# Supplementary material for: Photobiocatalytic benzylic C–H acylation enabled by the synergy of a thiamine-dependent enzyme, an organophotocatalyst and hydrogen-atom-transfer
Source: Research Square preprint supplement (doi:10.21203/rs.3.rs-5395757/v1), 2025-05-16
Supplement: Supplementary file 1 [file 1f2a7a19d8d1b6c6d3f02b1b.pdf]

Supplementary Materials for

**Photobiocatalytic benzylic C–H acylation enabled by the synergy of a  
thiamine-dependent enzyme, an organophotocatalyst and  
hydrogen-atom-transfer**

Xichao Peng<sup>#</sup>, Jianqiang Feng<sup>#</sup>, Fulu Liu<sup>#</sup>, Wenzheng Xie<sup>#</sup>, Hailong Sun, Yuanyuan Xu, Yang Ming,  
Zhongqiu Xing, Yu Zheng, Binju Wang\*, Yi-Tao Long\*, Xiaoqiang Huang\*

\*Corresponding author. Email: [huangx513@nju.edu.cn](mailto:huangx513@nju.edu.cn);

[yitaolong@nju.edu.cn](mailto:yitaolong@nju.edu.cn);

[wangbinju2018@xmu.edu.cn](mailto:wangbinju2018@xmu.edu.cn)

**This PDF file includes:**

|                                                                                      |            |
|--------------------------------------------------------------------------------------|------------|
| <b>Supplementary Figs. 1-11 .....</b>                                                | <b>3</b>   |
| <b>Supplementary Tables 1-25 .....</b>                                               | <b>14</b>  |
| <b>Supplementary Methods .....</b>                                                   | <b>44</b>  |
| <b>1. General Information .....</b>                                                  | <b>44</b>  |
| <b>2. Expression, Purification, and Concentration Determination of Enzymes .....</b> | <b>45</b>  |
| <b>3. Directed Evolution.....</b>                                                    | <b>51</b>  |
| 3.1 Materials and General Methods for Directed Evolution.....                        | 51         |
| 3.2 The Evolution Trajectory.....                                                    | 51         |
| 3.3 Mutant Creation.....                                                             | 52         |
| <b>4. Typical Procedure for Photobiocatalytic Reactions .....</b>                    | <b>53</b>  |
| <b>5. Preparation of Racemic References .....</b>                                    | <b>54</b>  |
| <b>6. Mechanistic Studies .....</b>                                                  | <b>56</b>  |
| 6.1 TEMPO Trapping Experiment .....                                                  | 56         |
| 6.2 Ethene-1,1-diylidibenzene Trapping Experiment.....                               | 58         |
| 6.3 BHT Trapping Experiment .....                                                    | 61         |
| 6.4 Kinetic Isotope Effect Experiments.....                                          | 63         |
| 6.5 Stern-Volmer Luminescence Quenching Studies .....                                | 67         |
| 6.6 Discussion on the Organophotoredox Catalysis.....                                | 68         |
| 6.7 UV-Visible Spectroelectrochemical Studies .....                                  | 69         |
| 6.8 Michaelis Menten Kinetics Measurement .....                                      | 70         |
| <b>7. Computational Studies .....</b>                                                | <b>73</b>  |
| 7.1 System Setup and Molecular Dynamics (MD) Simulations.....                        | 73         |
| 7.2 QM/MM Calculations for Enzymatic Reactions .....                                 | 74         |
| 7.3 QM Calculations for Radical Generation .....                                     | 75         |
| 7.4 Spectral Calculations .....                                                      | 76         |
| <b>8. Experimental and Characterization Data of Racemic Products.....</b>            | <b>77</b>  |
| <b>9. NMR Spectra of Racemic Standards .....</b>                                     | <b>144</b> |
| <b>10. References .....</b>                                                          | <b>220</b> |

## Supplementary Figs. 1-11

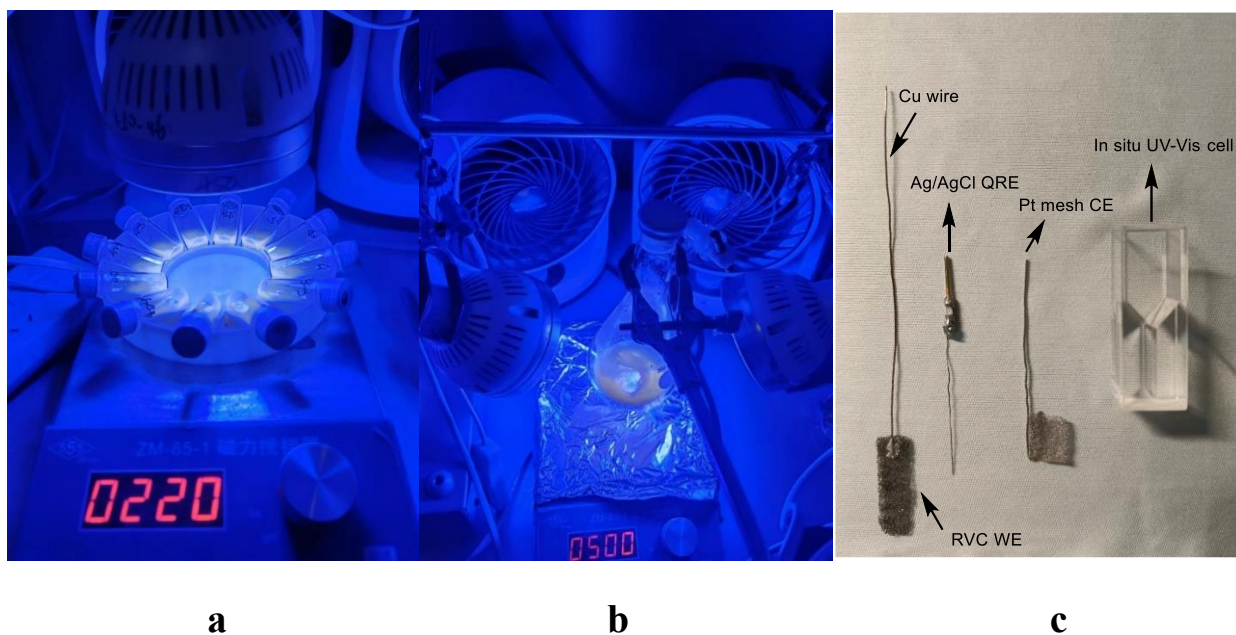

**Supplementary Fig. 1 | Photobiocatalytic reaction set-up.** **a**, Set-up for 0.004 mmol scale reactions, reaction vials were placed on the stir-plate, at a distance of  $\sim 10$  cm from a 450-460 nm LEDs lamp, with a cooling fan. **b**, Set-up for 0.1 mmol scale reactions, the reaction was carried out in a 200 mL Schlenk flask with two 450-460 nm LEDs lamps and two cooling fans; LED lamps were purchased from the Chinese Taobao branded as “JiaDeng”. Unless otherwise noted, the wavelength of the LEDs used is 450-460 nm. **c**, Devices for the spectroelectrochemical studies.

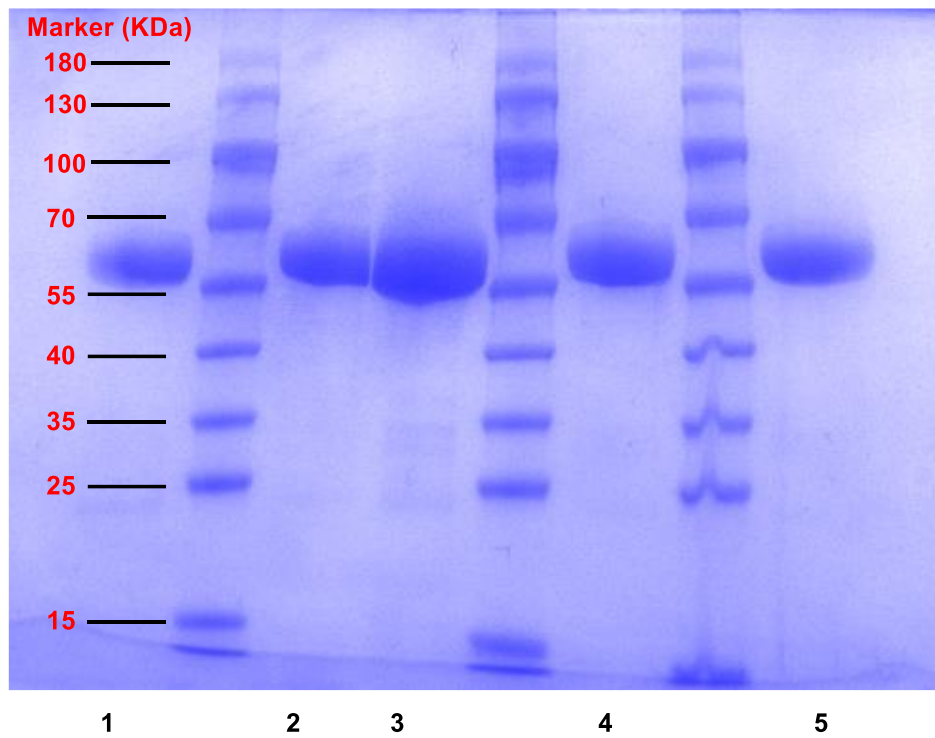

**Supplementary Fig. 2 | SDS-PAGE analysis showing the purity of the enzymes.** 1, *PfBAL*; 2, *PfBAL*\_T481L; 3, *PfBAL*\_T481L-A480G; 4, *PfBAL*\_T481L-A480G-Y397A; 5, *PfBAL*\_T481L-A480G-Y397A-W163C. Other lines are makers.



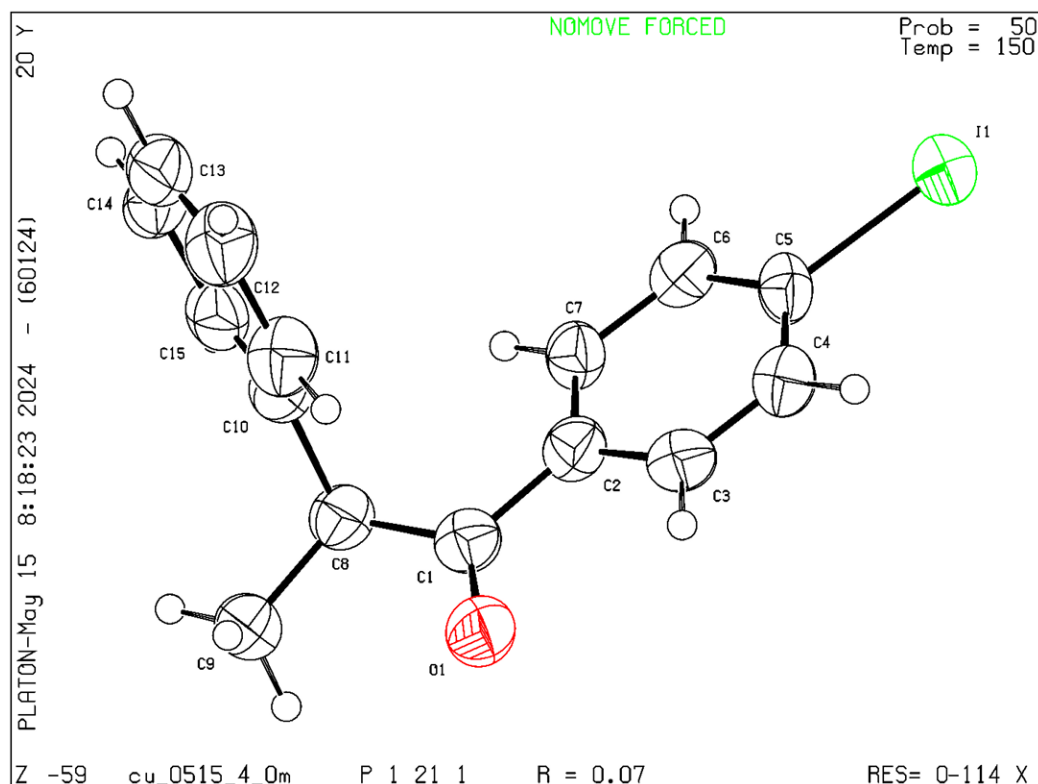

**Supplementary Fig. 3 | X-Ray diffraction data.** X-Ray diffraction data of (*S*)-**3g** (CCDC 2355842) obtained from the reactions catalysed by *Pf*BAL\_T481L-A480G-Y397A-W163C. See the Supplementary Table 21 for detailed discussion.

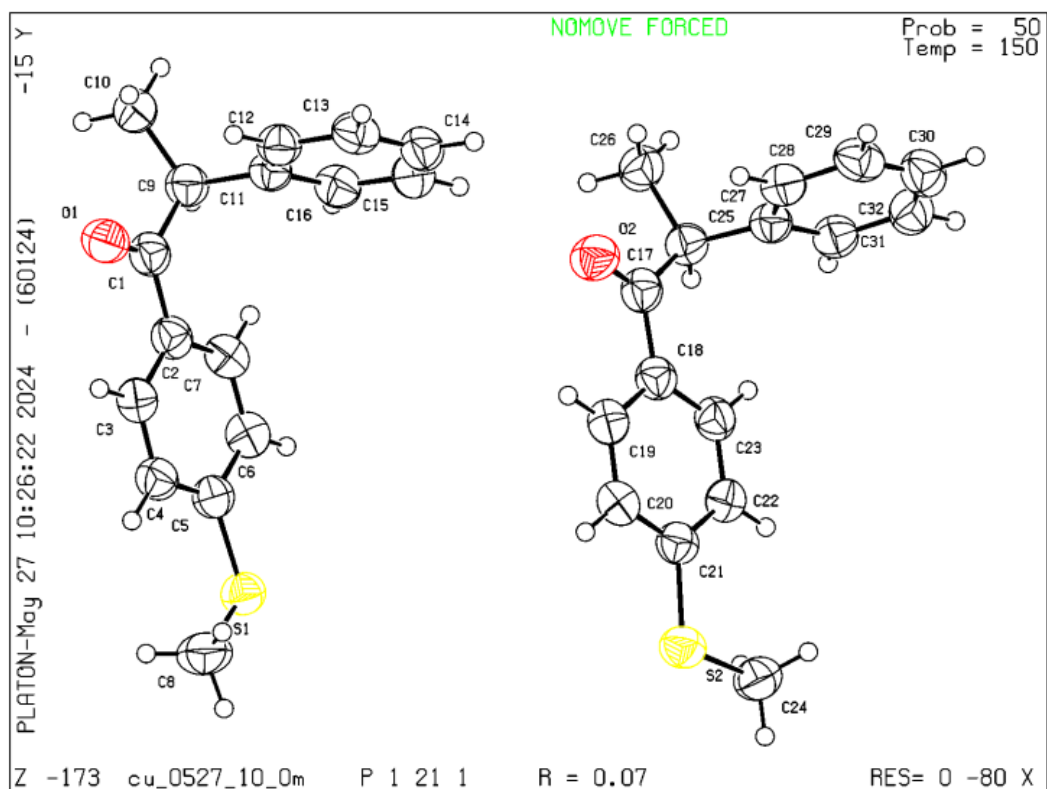

**Supplementary Fig. 4 | X-Ray diffraction data.** X-Ray diffraction data of (*S*)-**3k** (CCDC 2358465) obtained from the reactions catalysed by *Pf*BAL\_T481L-A480G-Y397A-W163C. See the Supplementary Table 22 for detailed discussion.

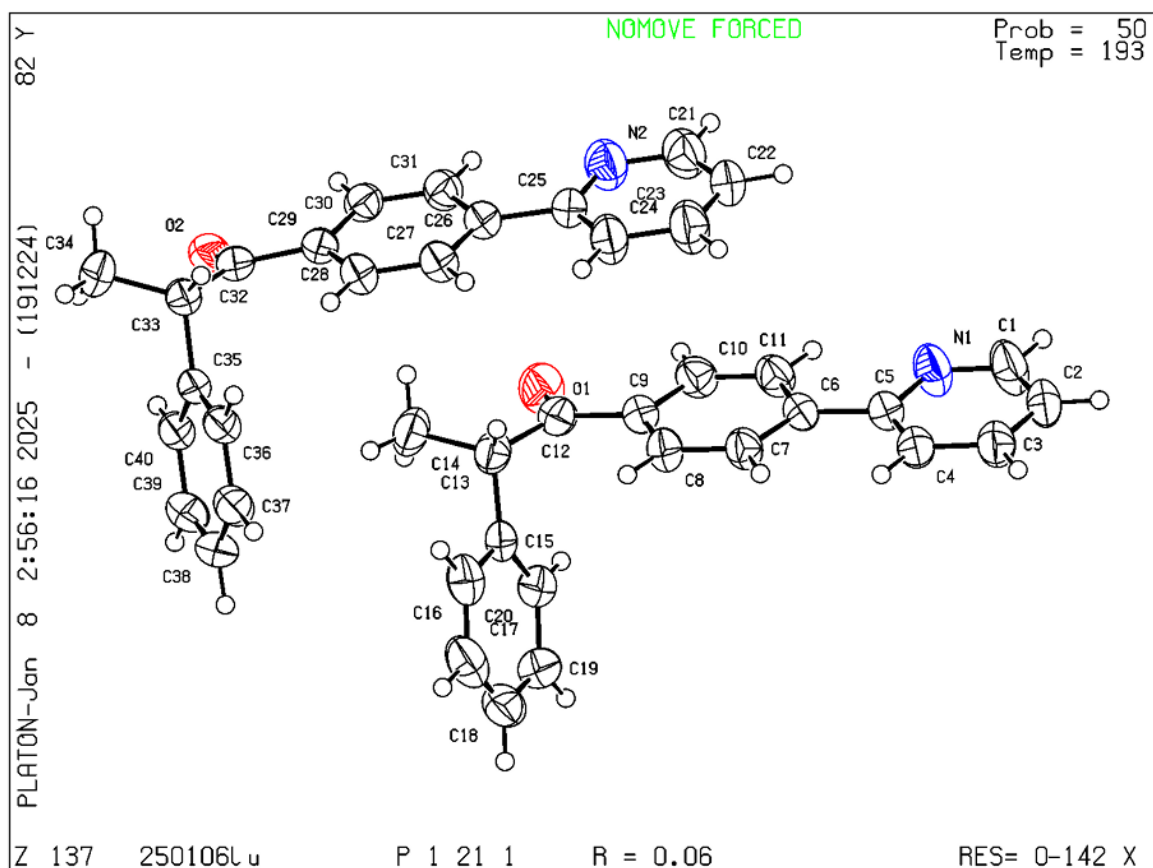

**Supplementary Fig. 5 | X-Ray diffraction data.** X-Ray diffraction data of (*S*)-**3q** (CCDC 2416063) obtained from the reactions catalysed by *Pf*BAL\_T481L-A480G-Y397A-W163C. See the Supplementary Table 23 for detailed discussion.

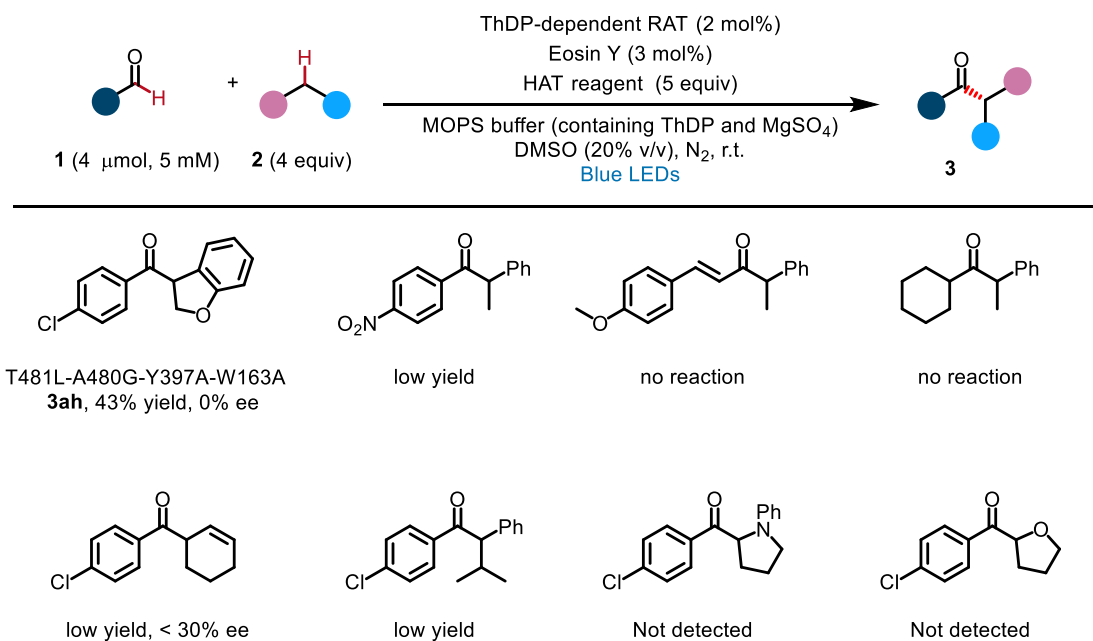

**Supplementary Fig. 6 | Unsuccessful examples.** Conditions: **1** (0.004 mmol), **2** (0.016 mmol), HAT reagent **2** (0.020 mmol), *PfBAL*\_T481L; *PfBAL*\_T481L-A480G or *PfBAL*\_T481L-A480G-Y397A-W163C (2 mol%) as biocatalysts, Eosin Y (3 mol%), 20 v/v % DMSO in 100 mM MOPS buffer (pH 8.0, containing 2.5 mM  $\text{MgSO}_4$  and 0.15 mM ThDP) were stirred for 14 h at room temperature under  $\text{N}_2$  atmosphere with the irradiation of 450-460 nm LEDs; total volume of the reaction is 0.8 mL. The reactions were detected by GC-MS.

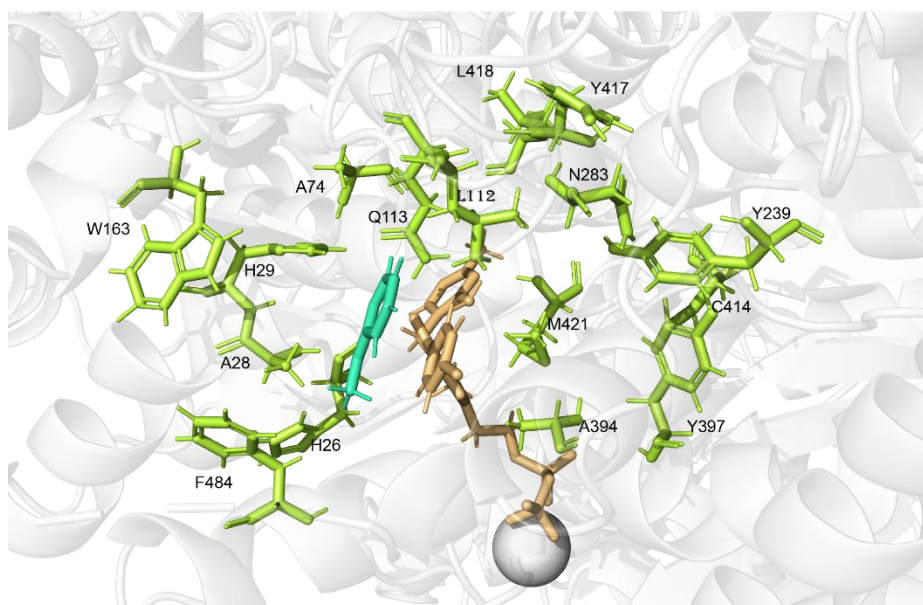

**Supplementary Fig. 7 | Sites selected for evolution.** Based on a MD-simulated benzylic radical within the active site of *PjBAL\_T481L-A480G* in the form of ThDP-**1a**-derived ketyl radical, sixteen residues were selected within 5 Å radius of the simulated benzylic radical intermediate.

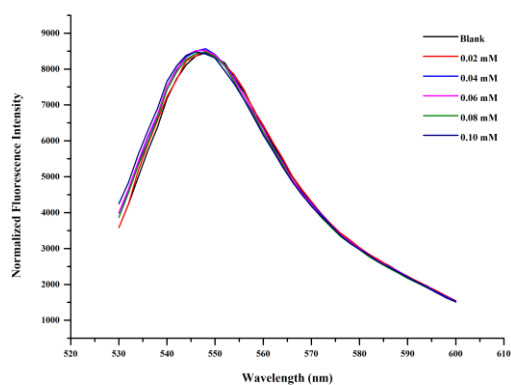

**a**

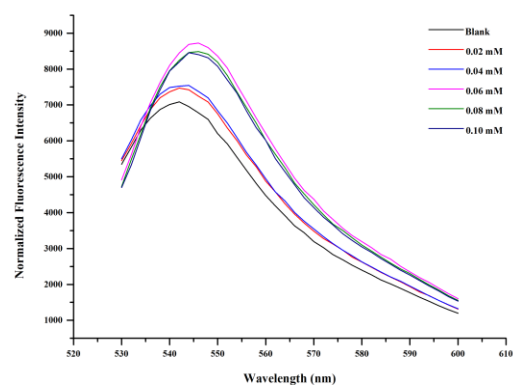

**b**

**Supplementary Fig. 8 | Stern-Volmer luminescence quenching studies with different quenchers.**  
**a**, HAT reagent 2 was used as the quencher. **b**, the mixture of **RAT<sub>CH</sub>** and **1a** was used as the quencher.  
 See the Method section, 6.5 Stern-Volmer Luminescence Quenching Studies, for detailed discussions.

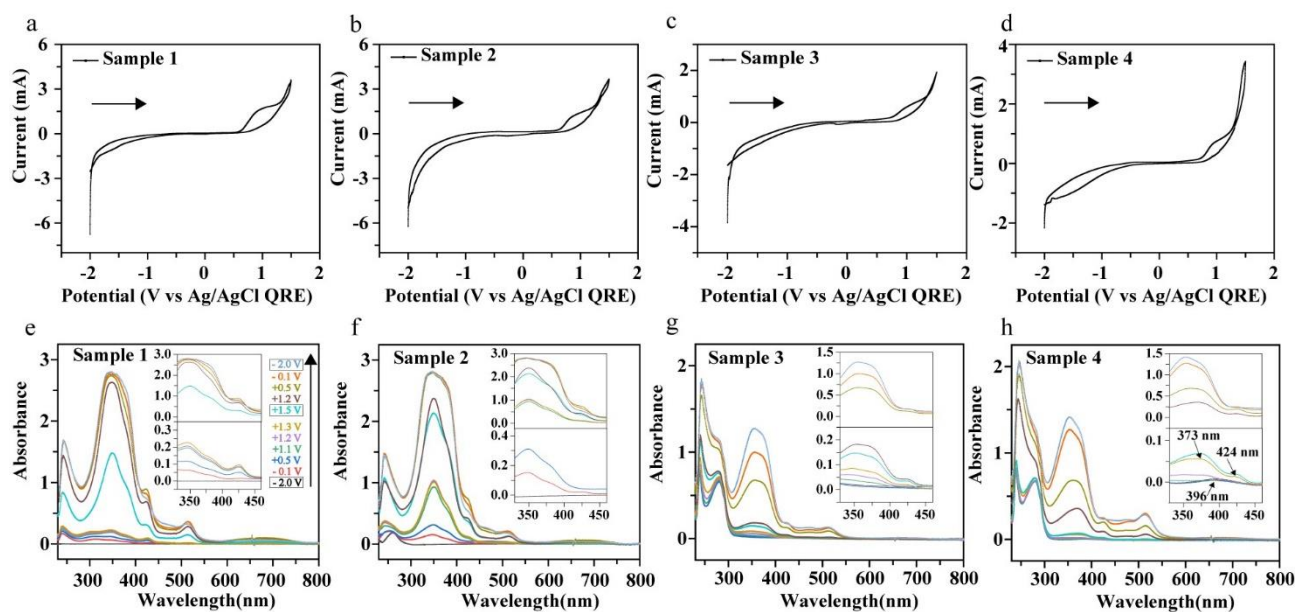

**Supplementary Fig. 9** | Cyclic voltammograms of **a**, Sample 1: MOPS buffer (100 mM, pH 8.0, containing 2.5 mM  $\text{MgSO}_4$  and 0.15 mM ThDP); **b**, Sample 2: MOPS buffer (100 mM, pH 8.0, containing 2.5 mM  $\text{MgSO}_4$  and 0.15 mM ThDP) + 0.1 mM **1a**; **c**, Sample 3: MOPS buffer (100 mM, pH 8.0, containing 2.5 mM  $\text{MgSO}_4$  and 0.15 mM ThDP) + 0.1 mM **RAT<sub>CH</sub>**; **d**, Sample 4: MOPS buffer (100 mM, pH 8.0, containing 2.5 mM  $\text{MgSO}_4$  and 0.15 mM ThDP) + 0.1 mM **1a** + 0.1 mM **RAT<sub>CH</sub>**. Each solution was with a total volume of 0.75 mL with 20 v/v % DMSO. UV-Visible spectra of **e**, Sample 1; **f**, Sample 2; **g**, Sample 3 and **h**, Sample 4 at various potentials during CV testing. In the insets the spectra correspond to the range of 400 nm to 450 nm.

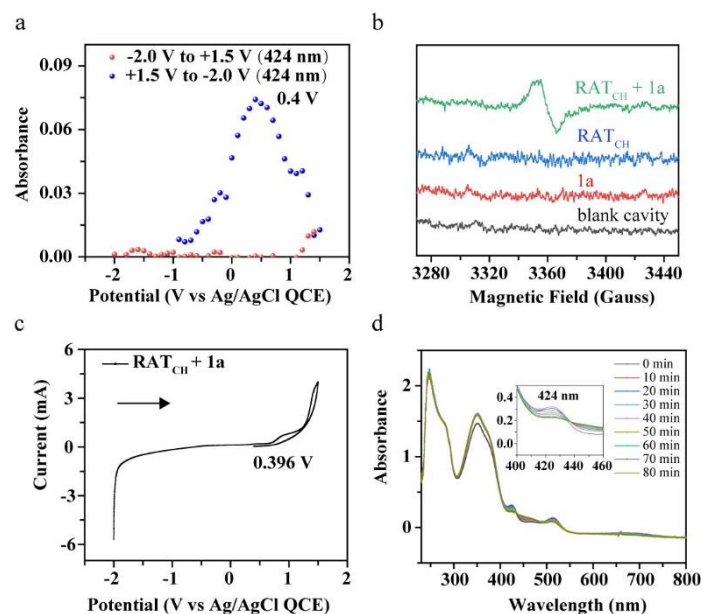

**Supplementary Fig. 10** | **a**, In-situ UV-Vis spectroelectrochemical testing shows the variation of the UV-Vis characteristic absorption peak of Sample 4 at 424 nm with changes in potential. **b**, Low-temperature electron paramagnetic resonance (EPR) experiments. EPR experimental conditions: microwave frequency, 9.44 GHz; microwave power, 20 mW; modulation amplitude, 1.0 G; temperature, 100 K. **c**, The CV test for Sample 4 was conducted with the voltage applied until +0.396 V was reached. **d**, After ceasing voltage application at +0.396 V, Sample 4 exhibited radical decay. In the insets the spectra correspond to the range of 400 nm to 450 nm.



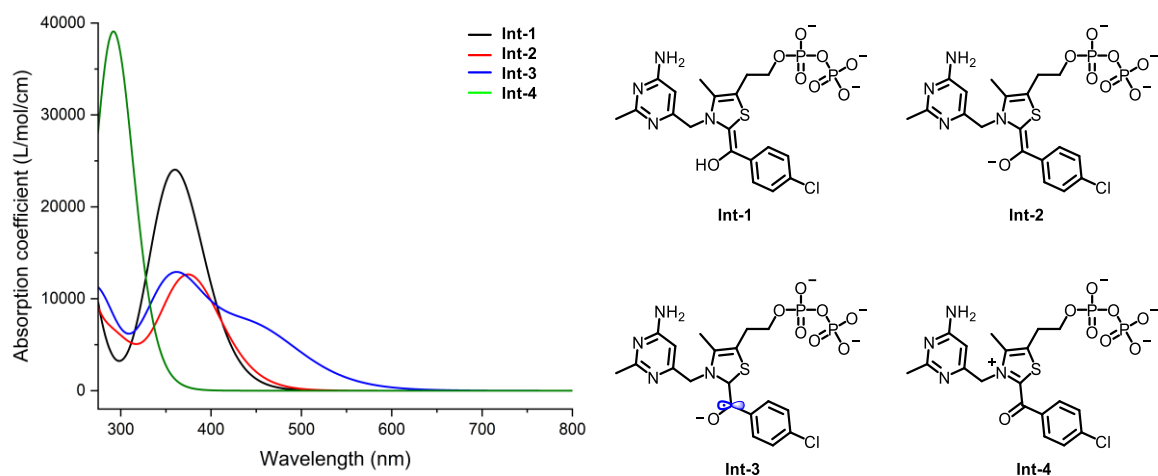

**Supplementary Fig. 11** | Calculated UV-vis absorption spectra of the key intermediates. See the Method section, 7.4 Spectral Calculations for Computational Studies.

## Supplementary Tables 1-25

**Supplementary Table 1 | ThDP-dependent enzymes screened for enantioselective C(sp<sup>3</sup>)-H bond radical acylation reaction.** Conditions: 4-chlorobenzaldehyde **1a** (0.004 mmol), ethylbenzene **2a** (0.016 mmol), HAT reagent 1 (0.020 mmol), biocatalysts (2 mol%), Eosin Y (3 mol%), 20 v/v % DMSO in 50 mM MOPS buffer (pH 7.5, containing 2.5 mM MgSO<sub>4</sub> and 0.15 mM ThDP) were stirred for 14 h at room temperature under N<sub>2</sub> atmosphere with the irradiation of 530-540 nm LEDs; total volume of the reaction is 0.8 mL. The yield was determined by GC. Enantiomeric excess was determined by HPLC analysis on a chiral stationary phase. n.d. = not determined. <sup>a</sup>Given in numbers are NCBI accession numbers. n.a. = not applicable.

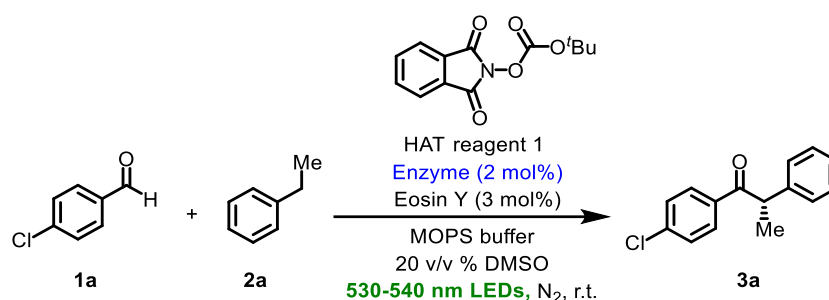

| biocatalyst                     | accession<br>number <sup>a</sup> | PDB code | yield (%)  | ee (%) |
|---------------------------------|----------------------------------|----------|------------|--------|
| <i>PfBAL</i>                    | 3D7K_A                           | 3D7K     | 1.1        | n.d.   |
| <i>PpBFD</i>                    | WP_016501746.1                   | 1MCZ     | 0.6        | n.d.   |
| <i>EcMenD</i>                   | WP_001295284.1                   | 5EJ8     | 0          | n.d.   |
| <i>EcTK</i>                     | 1QGD_A                           | 1QGD     | 0          | n.d.   |
| <i>PaBAL</i>                    | WP_135246357.1                   | n.a.     | 0.6        | n.d.   |
| CDH                             | WP_169259343.1                   | 2PGO     | 0          | n.d.   |
| <i>LlKdcA</i>                   | QII57472.1                       | 2VBG     | 0.4        | n.d.   |
| <i>PfBAL_T481L</i>              | n.a.                             | n.a.     | 2.2        | n.d.   |
| <b><i>PfBAL_T481L-A480G</i></b> | n.a.                             | n.a.     | <b>2.5</b> | n.d.   |

**Supplementary Table 2 | HAT reagents screened for enantioselective C(sp<sup>3</sup>)-H bond radical acylation reaction.** Conditions: 4-chlorobenzaldehyde **1a** (0.004 mmol), ethylbenzene **2a** (0.016 mmol), HAT reagent (0.020 mmol), *PfBAL*\_T481L-A480G (2 mol%), Eosin Y (3 mol%), 20 v/v % DMSO in 50 mM MOPS buffer (pH 7.5, containing 2.5 mM MgSO<sub>4</sub> and 0.15 mM ThDP) were stirred for 14 h at room temperature under N<sub>2</sub> atmosphere with the irradiation of 530-540 nm LEDs; total volume of the reaction is 0.8 mL. The yield was determined by GC. Enantiomeric excess was determined by HPLC analysis on a chiral stationary phase. n.d. = not determined.

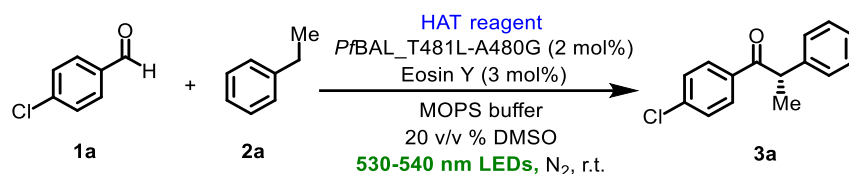

| biocatalyst          | yield (%) | ee (%)    |
|----------------------|-----------|-----------|
| HAT reagent 1        | 2.5       | n.d.      |
| <b>HAT reagent 2</b> | <b>24</b> | <b>92</b> |
| HAT reagent 3        | 15        | 90        |
| HAT reagent 4        | 0         | n.d.      |
| HAT reagent 5        | 4         | n.d.      |

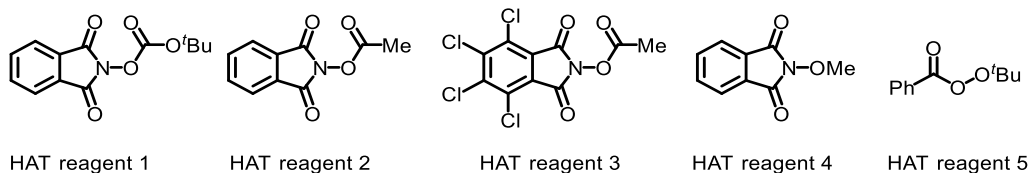

**Supplementary Table 3 | Photocatalysts screened for enantioselective C(sp<sup>3</sup>)-H bond radical acylation reaction.** Conditions: 4-chlorobenzaldehyde **1a** (0.004 mmol), ethylbenzene **2a** (0.016 mmol), HAT reagent **2** (0.020 mmol), *PfBAL\_T481L-A480G* (2 mol%), Photocatalysts (X mol%), 20 v/v % DMSO in 50 mM MOPS buffer (pH 7.5, containing 2.5 mM MgSO<sub>4</sub> and 0.15 mM ThDP) were stirred for 14 h at room temperature under N<sub>2</sub> atmosphere with the irradiation of LEDs (PC 1, 530-540 nm or 450-460 nm; PC 2, PC 5, PC 6, 450-460 nm; PC 3, PC 4, 420-430 nm); total volume of the reaction is 0.8 mL. The yield was determined by GC. Enantiomeric excess was determined by HPLC analysis on a chiral stationary phase. n.d. = not determined.

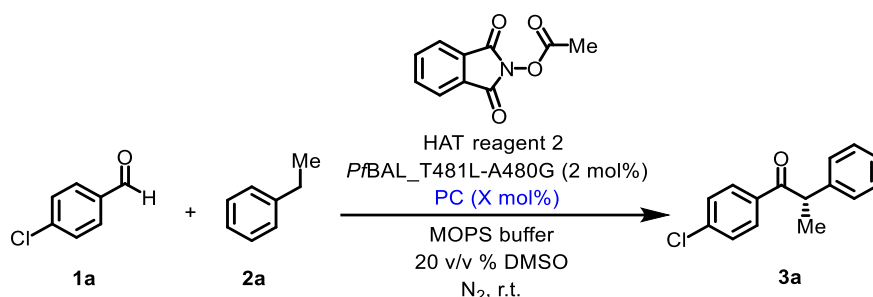

| photocatalysts       | LEDs wavelength   | yield (%) | ee (%)    |
|----------------------|-------------------|-----------|-----------|
| PC 1 (3 mol%)        | 530-540 nm        | 24        | 92        |
| <b>PC 1 (3 mol%)</b> | <b>450-460 nm</b> | <b>26</b> | <b>92</b> |
| PC 2 (1 mol%)        | 450-460 nm        | 11        | 88        |
| PC 3 (1 mol%)        | 420-430 nm        | 7         | 91        |
| PC 4 (1 mol%)        | 420-430 nm        | 10        | 87        |
| PC 5 (3 mol%)        | 450-460 nm        | 16        | 90        |
| PC 6 (3 mol%)        | 450-460 nm        | 1         | n.d.      |

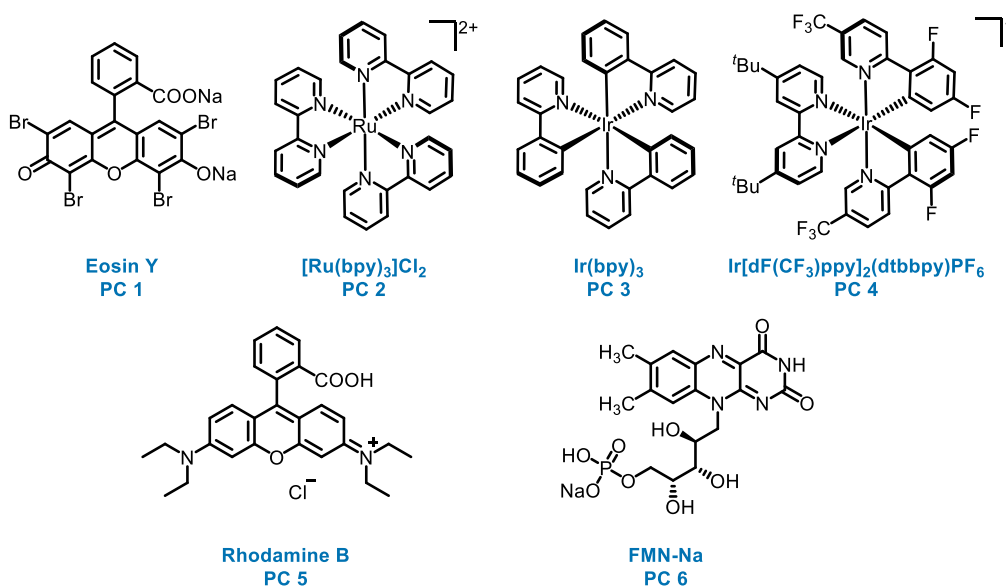

**Supplementary Table 4 | The results of glycine scanning.** Conditions: 4-chlorobenzaldehyde **1a** (0.004 mmol), ethylbenzene **2a** (0.016 mmol), HAT reagent **2** (0.020 mmol), mutants (2 mol%), Eosin Y (3 mol%), 20 v/v % DMSO in 50 mM MOPS buffer (pH 7.5, containing 2.5 mM MgSO<sub>4</sub> and 0.15 mM ThDP) were stirred for 14 h at room temperature under N<sub>2</sub> atmosphere with the irradiation of 450-460 nm LEDs; total volume of the reaction is 0.8 mL. The yield was determined by GC. Enantiomeric excess was determined by HPLC analysis on a chiral stationary phase. n.d. = not determined.

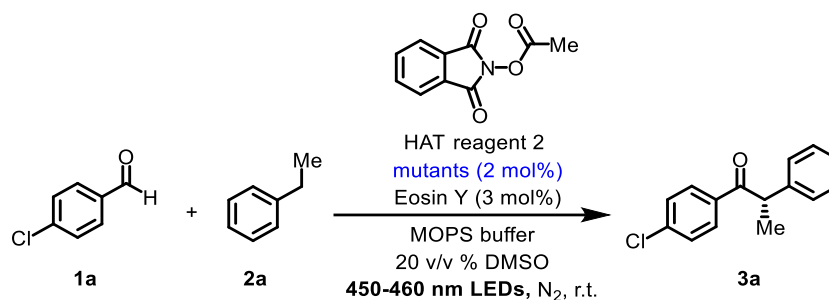

| mutants                        | yield (%) | ee (%) |
|--------------------------------|-----------|--------|
| <i>PfBAL_T481L-A480G-H26G</i>  | 2         | n.d.   |
| <i>PfBAL_T481L-A480G-A28G</i>  | 6         | 71     |
| <i>PfBAL_T481L-A480G-H29G</i>  | 1         | n.d.   |
| <i>PfBAL_T481L-A480G-A74G</i>  | 3         | n.d.   |
| <i>PfBAL_T481L-A480G-L112G</i> | 6         | 75     |
| <i>PfBAL_T481L-A480G-Q113G</i> | 4         | n.d.   |
| <i>PfBAL_T481L-A480G-W163G</i> | 10        | 90     |
| <i>PfBAL_T481L-A480G-Y239G</i> | 27        | 88     |
| <i>PfBAL_T481L-A480G-N283G</i> | 17        | 89     |
| <i>PfBAL_T481L-A480G-A394G</i> | 5         | n.d.   |
| <i>PfBAL_T481L-A480G-Y397G</i> | 36        | 89     |
| <i>PfBAL_T481L-A480G-C414G</i> | 18        | 88     |
| <i>PfBAL_T481L-A480G-Y417G</i> | 2         | n.d.   |
| <i>PfBAL_T481L-A480G-L418G</i> | 1         | n.d.   |
| <i>PfBAL_T481L-A480G-M421G</i> | 1         | n.d.   |
| <i>PfBAL_T481L-A480G-F484G</i> | 0         | n.d.   |

**Supplementary Table 5 | Saturation mutagenesis on site 397.** Conditions: 4-chlorobenzaldehyde **1a** (0.004 mmol), ethylbenzene **2a** (0.016 mmol), HAT reagent 2 (0.020 mmol), mutants (2 mol%), Eosin Y (3 mol%), 20 v/v % DMSO in 50 mM MOPS buffer (pH 7.5, containing 2.5 mM MgSO<sub>4</sub> and 0.15 mM ThDP) were stirred for 14 h at room temperature under N<sub>2</sub> atmosphere with the irradiation of 450-460 nm LEDs; total volume of the reaction is 0.8 mL. The yield was determined by GC. Enantiomeric excess was determined by HPLC analysis on a chiral stationary phase.

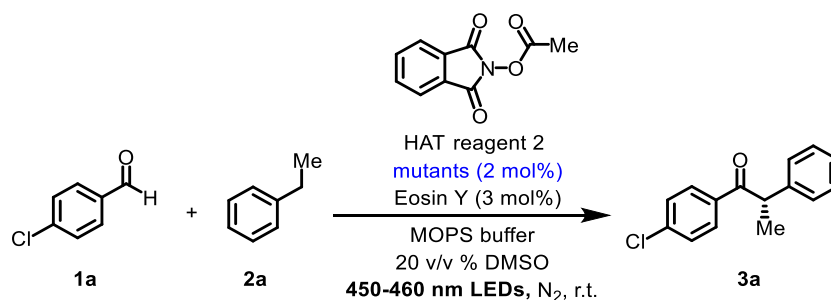

| mutants                               | yield (%) | ee (%)    |
|---------------------------------------|-----------|-----------|
| <i>PfBAL_T481L-A480G-Y397G</i>        | 36        | 89        |
| <b><i>PfBAL_T481L-A480G-Y397A</i></b> | <b>40</b> | <b>93</b> |
| <i>PfBAL_T481L-A480G-Y397V</i>        | 23        | 90        |
| <i>PfBAL_T481L-A480G-Y397I</i>        | 25        | 87        |
| <i>PfBAL_T481L-A480G-Y397T</i>        | 21        | 88        |
| <i>PfBAL_T481L-A480G-Y397L</i>        | 22        | 89        |
| <i>PfBAL_T481L-A480G-Y397P</i>        | 28        | 89        |
| <i>PfBAL_T481L-A480G-Y397K</i>        | 27        | 86        |
| <i>PfBAL_T481L-A480G-Y397F</i>        | 32        | 86        |
| <i>PfBAL_T481L-A480G-Y397W</i>        | 30        | 91        |
| <i>PfBAL_T481L-A480G-Y397D</i>        | 18        | 88        |
| <i>PfBAL_T481L-A480G-Y397N</i>        | 18        | 89        |
| <i>PfBAL_T481L-A480G-Y397R</i>        | 30        | 81        |
| <i>PfBAL_T481L-A480G-Y397E</i>        | 25        | 94        |
| <i>PfBAL_T481L-A480G-Y397Q</i>        | 17        | 92        |
| <i>PfBAL_T481L-A480G-Y397H</i>        | 24        | 91        |
| <i>PfBAL_T481L-A480G-Y397M</i>        | 24        | 89        |

**Supplementary Table 6 | Saturation mutagenesis on site 163.** Conditions: 4-chlorobenzaldehyde **1a** (0.004 mmol), ethylbenzene **2a** (0.016 mmol), HAT reagent 2 (0.020 mmol), mutants (2 mol%), Eosin Y (3 mol%), 20 v/v % DMSO in 50 mM MOPS buffer (pH 7.5, containing 2.5 mM MgSO<sub>4</sub> and 0.15 mM ThDP) were stirred for 14 h at room temperature under N<sub>2</sub> atmosphere with the irradiation of 450-460 nm LEDs; total volume of the reaction is 0.8 mL. The yield was determined by GC. Enantiomeric excess was determined by HPLC analysis on a chiral stationary phase. n.d. = not determined.



| mutants                        | yield (%) | ee (%) |
|--------------------------------|-----------|--------|
| <i>PfBAL_T481L-A480G-W163S</i> | 24        | 91     |
| <i>PfBAL_T481L-A480G-W163M</i> | 22        | 89     |
| <i>PfBAL_T481L-A480G-W163E</i> | 28        | 92     |
| <i>PfBAL_T481L-A480G-W163T</i> | 21        | 89     |
| <i>PfBAL_T481L-A480G-W163C</i> | 34        | 90     |
| <i>PfBAL_T481L-A480G-W163Q</i> | 23        | 91     |
| <i>PfBAL_T481L-A480G-W163P</i> | 17        | 87     |
| <i>PfBAL_T481L-A480G-W163D</i> | 2         | n.d.   |
| <i>PfBAL_T481L-A480G-W163K</i> | 23        | 90     |
| <i>PfBAL_T481L-A480G-W163N</i> | 23        | 92     |
| <i>PfBAL_T481L-A480G-W163A</i> | 41        | 90     |
| <i>PfBAL_T481L-A480G-W163L</i> | 32        | 84     |
| <i>PfBAL_T481L-A480G-W163V</i> | 39        | 92     |
| <i>PfBAL_T481L-A480G-W163F</i> | 21        | 93     |
| <i>PfBAL_T481L-A480G-W163Y</i> | 23        | 90     |
| <i>PfBAL_T481L-A480G-W163H</i> | 19        | 89     |

**Supplementary Table 7 | Mutagenesis on site 283.** Conditions: 4-chlorobenzaldehyde **1a** (0.004 mmol), ethylbenzene **2a** (0.016 mmol), HAT reagent 2 (0.020 mmol), mutants (2 mol%), Eosin Y (3 mol%), 20 v/v % DMSO in 50 mM MOPS buffer (pH 7.5, containing 2.5 mM MgSO<sub>4</sub> and 0.15 mM ThDP) were stirred for 14 h at room temperature under N<sub>2</sub> atmosphere with the irradiation of 450-460 nm LEDs; total volume of the reaction is 0.8 mL. The yield was determined by GC. Enantiomeric excess was determined by HPLC analysis on a chiral stationary phase. n.d. = not determined.

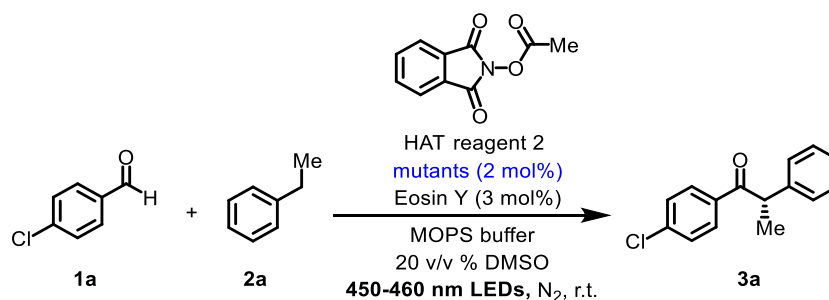

| mutants                        | yield (%) | ee (%) |
|--------------------------------|-----------|--------|
| <i>PfBAL_T481L-A480G-N283V</i> | 8         | n.d.   |
| <i>PfBAL_T481L-A480G-N283G</i> | 17        | 89     |
| <i>PfBAL_T481L-A480G-N283I</i> | 6         | n.d.   |
| <i>PfBAL_T481L-A480G-N283L</i> | 12        | 86     |
| <i>PfBAL_T481L-A480G-N283W</i> | 26        | 86     |
| <i>PfBAL_T481L-A480G-N283M</i> | 23        | 91     |
| <i>PfBAL_T481L-A480G-N283D</i> | 17        | 85     |
| <i>PfBAL_T481L-A480G-N283E</i> | 23        | 89     |
| <i>PfBAL_T481L-A480G-N283Q</i> | 17        | 89     |
| <i>PfBAL_T481L-A480G-N283H</i> | 16        | 84     |
| <i>PfBAL_T481L-A480G-N283C</i> | 22        | 88     |
| <i>PfBAL_T481L-A480G-N283T</i> | 20        | 88     |



**Supplementary Table 8 | Site-specific mutagenesis on sites 113/239/26/414.** Conditions: 4-chlorobenzaldehyde **1a** (0.004 mmol), ethylbenzene **2a** (0.016 mmol), HAT reagent 2 (0.020 mmol), mutants (2 mol%), Eosin Y (3 mol%), 20 v/v % DMSO in 50 mM MOPS buffer (pH 7.5, containing 2.5 mM MgSO<sub>4</sub> and 0.15 mM ThDP) were stirred for 14 h at room temperature under N<sub>2</sub> atmosphere with the irradiation of 450-460 nm LEDs; total volume of the reaction is 0.8 mL. The yield was determined by GC. Enantiomeric excess was determined by HPLC analysis on a chiral stationary phase. n.d. = not determined.



| mutants                        | yield (%) | ee (%) |
|--------------------------------|-----------|--------|
| <i>PfBAL_T481L-A480G-Q113I</i> | 0         | n.d.   |
| <i>PfBAL_T481L-A480G-Q113A</i> | 0         | n.d.   |
| <i>PfBAL_T481L-A480G-Q113V</i> | 0         | n.d.   |
| <i>PfBAL_T481L-A480G-Q113L</i> | 9         | 77     |
| <i>PfBAL_T481L-A480G-Y239L</i> | 7         | 80     |
| <i>PfBAL_T481L-A480G-Y239T</i> | 31        | 83     |
| <i>PfBAL_T481L-A480G-Y239C</i> | 16        | 79     |
| <i>PfBAL_T481L-A480G-Y239F</i> | 29        | 92     |
| <i>PfBAL_T481L-A480G-Y239V</i> | 17        | 88     |
| <i>PfBAL_T481L-A480G-H26A</i>  | 30        | 93     |
| <i>PfBAL_T481L-A480G-H26L</i>  | 25        | 92     |
| <i>PfBAL_T481L-A480G-H26F</i>  | 18        | 87     |
| <i>PfBAL_T481L-A480G-H26Q</i>  | 36        | 94     |
| <i>PfBAL_T481L-A480G-C414A</i> | 18        | 89     |
| <i>PfBAL_T481L-A480G-C414L</i> | 4         | n.d.   |
| <i>PfBAL_T481L-A480G-C414F</i> | 0         | n.d.   |
| <i>PfBAL_T481L-A480G-C414I</i> | 0         | n.d.   |

**Supplementary Table 9 | Saturation mutagenesis on site 26 using *Pf*BAL\_T481L-A480G-Y397A as the parent.** Conditions: 4-chlorobenzaldehyde **1a** (0.004 mmol), ethylbenzene **2a** (0.016 mmol), HAT reagent 2 (0.020 mmol), mutants (2 mol%), Eosin Y (3 mol%), 20 v/v % DMSO in 50 mM MOPS buffer (pH 7.5, containing 2.5 mM MgSO<sub>4</sub> and 0.15 mM ThDP) were stirred for 14 h at room temperature under N<sub>2</sub> atmosphere with the irradiation of 450-460 nm LEDs; total volume of the reaction is 0.8 mL. The yield was determined by GC. Enantiomeric excess was determined by HPLC analysis on a chiral stationary phase. n.d. = not determined.



| mutants                              | yield (%) | ee (%) |
|--------------------------------------|-----------|--------|
| <i>Pf</i> BAL_T481L-A480G-Y397A-H26T | 24        | 91     |
| <i>Pf</i> BAL_T481L-A480G-Y397A-H26E | 26        | 95     |
| <i>Pf</i> BAL_T481L-A480G-Y397A-H26R | 10        | 95     |
| <i>Pf</i> BAL_T481L-A480G-Y397A-H26N | 4         | n.d.   |
| <i>Pf</i> BAL_T481L-A480G-Y397A-H26L | 22        | 95     |
| <i>Pf</i> BAL_T481L-A480G-Y397A-H26A | 15        | 95     |
| <i>Pf</i> BAL_T481L-A480G-Y397A-H26Q | 33        | 68     |
| <i>Pf</i> BAL_T481L-A480G-Y397A-H26F | 11        | 92     |
| <i>Pf</i> BAL_T481L-A480G-Y397A-H26I | 17        | 92     |
| <i>Pf</i> BAL_T481L-A480G-Y397A-H26S | 23        | 95     |
| <i>Pf</i> BAL_T481L-A480G-Y397A-H26K | 5         | n.d.   |
| <i>Pf</i> BAL_T481L-A480G-Y397A-H26M | 2         | n.d.   |
| <i>Pf</i> BAL_T481L-A480G-Y397A-H26P | 9         | 91     |
| <i>Pf</i> BAL_T481L-A480G-Y397A-H26D | 2         | n.d.   |
| <i>Pf</i> BAL_T481L-A480G-Y397A-H26G | 5         | n.d.   |
| <i>Pf</i> BAL_T481L-A480G-Y397A-H26W | 2         | n.d.   |
| <i>Pf</i> BAL_T481L-A480G-Y397A-H26C | 15        | 93     |
| <i>Pf</i> BAL_T481L-A480G-Y397A-H26V | 13        | 94     |

**Supplementary Table 10 | Saturation mutagenesis on site 163 using *PfBAL\_T481L-A480G-Y397G* as the parent.** Conditions: 4-chlorobenzaldehyde **1a** (0.004 mmol), ethylbenzene **2a** (0.016 mmol), HAT reagent 2 (0.020 mmol), mutants (2 mol%), Eosin Y (3 mol%), 20 v/v % DMSO in 50 mM MOPS buffer (pH 7.5, containing 2.5 mM MgSO<sub>4</sub> and 0.15 mM ThDP) were stirred for 14 h at room temperature under N<sub>2</sub> atmosphere with the irradiation of 450-460 nm LEDs; total volume of the reaction is 0.8 mL. The yield was determined by GC. Enantiomeric excess was determined by HPLC analysis on a chiral stationary phase. n.d. = not determined.

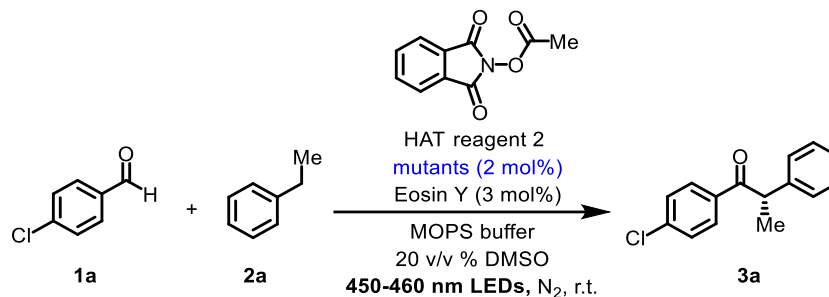

| mutants                              | yield (%) | ee (%) |
|--------------------------------------|-----------|--------|
| <i>PfBAL_T481L-A480G-Y397G-W163K</i> | 43        | 91     |
| <i>PfBAL_T481L-A480G-Y397G-W163A</i> | 44        | 91     |
| <i>PfBAL_T481L-A480G-Y397G-W163V</i> | 41        | 93     |
| <i>PfBAL_T481L-A480G-Y397G-W163F</i> | 41        | 93     |
| <i>PfBAL_T481L-A480G-Y397G-W163D</i> | 2         | n.d.   |
| <i>PfBAL_T481L-A480G-Y397G-W163N</i> | 27        | 90     |
| <i>PfBAL_T481L-A480G-Y397G-W163H</i> | 30        | 91     |
| <i>PfBAL_T481L-A480G-Y397G-W163S</i> | 29        | 87     |
| <i>PfBAL_T481L-A480G-Y397G-W163P</i> | 5         | n.d.   |
| <i>PfBAL_T481L-A480G-Y397G-W163I</i> | 32        | 91     |
| <i>PfBAL_T481L-A480G-Y397G-W163M</i> | 27        | 86     |
| <i>PfBAL_T481L-A480G-Y397G-W163C</i> | 27        | 86     |
| <i>PfBAL_T481L-A480G-Y397G-W163L</i> | 21        | 91     |
| <i>PfBAL_T481L-A480G-Y397G-W163Y</i> | 26        | 86     |
| <i>PfBAL_T481L-A480G-Y397G-W163G</i> | 25        | 89     |
| <i>PfBAL_T481L-A480G-Y397G-W163T</i> | 28        | 88     |
| <i>PfBAL_T481L-A480G-Y397G-W163Q</i> | 24        | 88     |

**Supplementary Table 11 | Saturation mutagenesis on site 163 using *PfBAL\_T481L-A480G-Y397A* as the parent.** Conditions: 4-chlorobenzaldehyde **1a** (0.004 mmol), ethylbenzene **2a** (0.016 mmol), HAT reagent 2 (0.020 mmol), mutants (2 mol%), Eosin Y (3 mol%), 20 v/v % DMSO in 50 mM MOPS buffer (pH 7.5, containing 2.5 mM MgSO<sub>4</sub> and 0.15 mM ThDP) were stirred for 14 h at room temperature under N<sub>2</sub> atmosphere with the irradiation of 450-460 nm LEDs; total volume of the reaction is 0.8 mL. The yield was determined by GC. Enantiomeric excess was determined by HPLC analysis on a chiral stationary phase.



| mutants                                     | yield (%) | ee (%)    |
|---------------------------------------------|-----------|-----------|
| <i>PfBAL_T481L-A480G-Y397A-W163K</i>        | 46        | 94        |
| <i>PfBAL_T481L-A480G-Y397A-W163M</i>        | 36        | 94        |
| <i>PfBAL_T481L-A480G-Y397A-W163E</i>        | 30        | 93        |
| <i>PfBAL_T481L-A480G-Y397A-W163R</i>        | 36        | 92        |
| <i>PfBAL_T481L-A480G-Y397A-W163N</i>        | 32        | 94        |
| <i>PfBAL_T481L-A480G-Y397A-W163Q</i>        | 37        | 93        |
| <i>PfBAL_T481L-A480G-Y397A-W163P</i>        | 21        | 90        |
| <i>PfBAL_T481L-A480G-Y397A-W163F</i>        | 38        | 94        |
| <i>PfBAL_T481L-A480G-Y397A-W163L</i>        | 40        | 95        |
| <i>PfBAL_T481L-A480G-Y397A-W163G</i>        | 36        | 93        |
| <i>PfBAL_T481L-A480G-Y397A-W163S</i>        | 36        | 94        |
| <i>PfBAL_T481L-A480G-Y397A-W163I</i>        | 35        | 93        |
| <i>PfBAL_T481L-A480G-Y397A-W163H</i>        | 34        | 93        |
| <b><i>PfBAL_T481L-A480G-Y397A-W163C</i></b> | <b>52</b> | <b>94</b> |
| <i>PfBAL_T481L-A480G-Y397A-W163A</i>        | 34        | 93        |
| <i>PfBAL_T481L-A480G-Y397A-W163V</i>        | 44        | 95        |

**Supplementary Table 12 | Optimization of the ratio of co-solvent DMSO.** Conditions: 4-chlorobenzaldehyde **1a** (0.004 mmol), ethylbenzene **2a** (0.016 mmol), HAT reagent 2 (0.020 mmol), *PfBAL\_T481L-A480G-Y397A-W163C* (2 mol%), Eosin Y (3 mol%), X v/v % DMSO in 50 mM MOPS buffer (pH 7.5, containing 2.5 mM MgSO<sub>4</sub> and 0.15 mM ThDP) were stirred for 14 h at room temperature under N<sub>2</sub> atmosphere with the irradiation of 450-460 nm LEDs; total volume of the reaction is 0.8 mL. The yield was determined by GC.

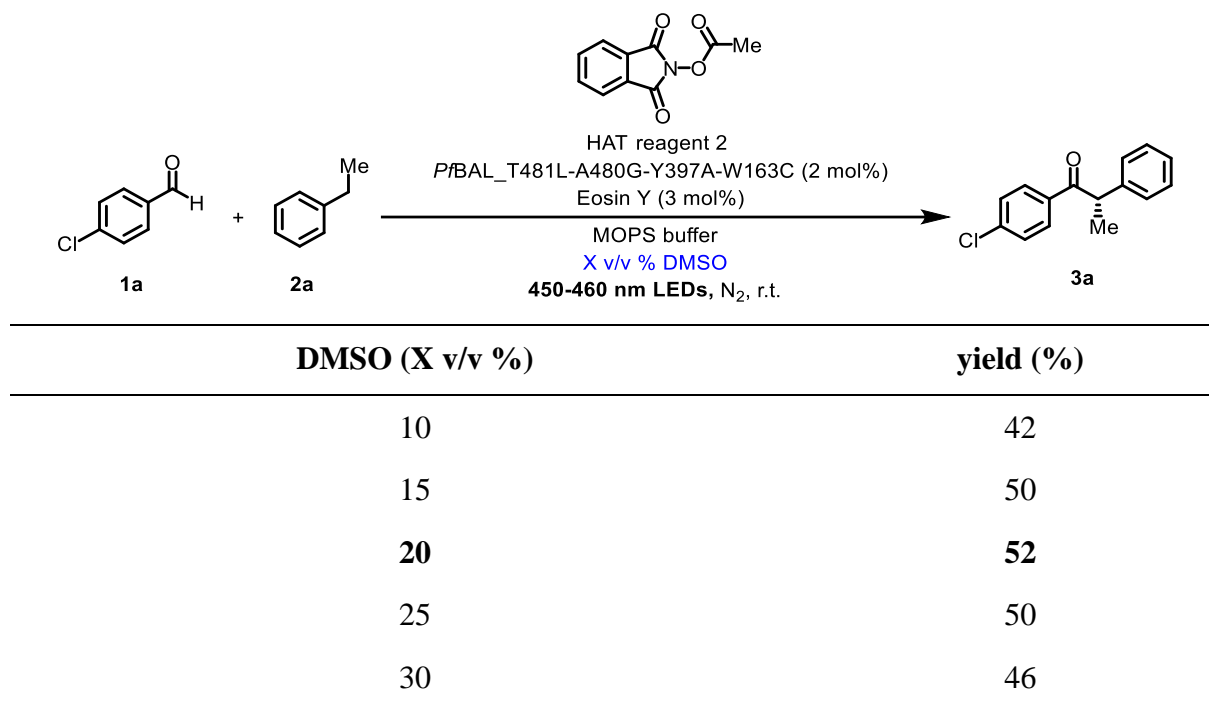

**Supplementary Table 13 | Optimization of MOPS concentration.** Conditions: 4-chlorobenzaldehyde **1a** (0.004 mmol), ethylbenzene **2a** (0.016 mmol), HAT reagent 2 (0.020 mmol), *PfBAL\_T481L-A480G-Y397A-W163C* (2 mol%), Eosin Y (3 mol%), 20 v/v % DMSO in MOPS buffer (pH 7.5, containing 2.5 mM MgSO<sub>4</sub> and 0.15 mM ThDP) were stirred for 14 h at room temperature under N<sub>2</sub> atmosphere with the irradiation of 450-460 nm LEDs; total volume of the reaction is 0.8 mL. The yield was determined by GC.

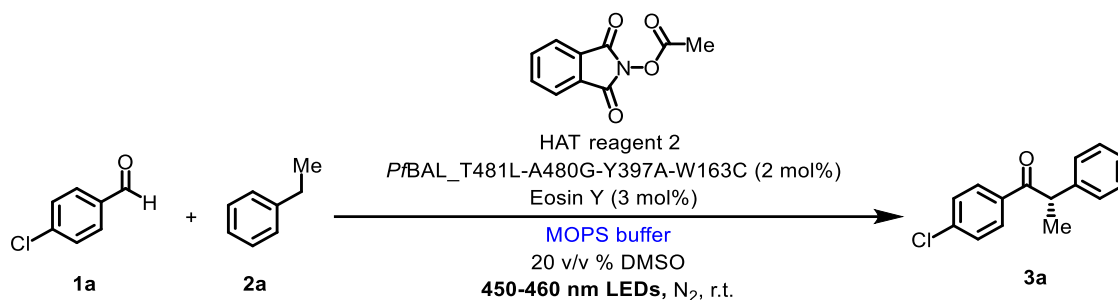

| MOPS (mM)  | yield (%) |
|------------|-----------|
| 25         | 46        |
| 50         | 52        |
| 75         | 53        |
| <b>100</b> | <b>56</b> |
| 125        | 54        |
| 150        | 43        |

**Supplementary Table 14 | Optimization of the amount of ThDP.** Conditions: 4-chlorobenzaldehyde **1a** (0.004 mmol), ethylbenzene **2a** (0.016 mmol), HAT reagent 2 (0.020 mmol), *PfBAL\_T481L-A480G-Y397A-W163C* (2 mol%), Eosin Y (3 mol%), 20 v/v % DMSO in 100 mM MOPS buffer (pH 7.5, containing 2.5 mM MgSO<sub>4</sub> and X mM ThDP) were stirred for 14 h at room temperature under N<sub>2</sub> atmosphere with the irradiation of 450-460 nm LEDs; total volume of the reaction is 0.8 mL. The yield was determined by GC.

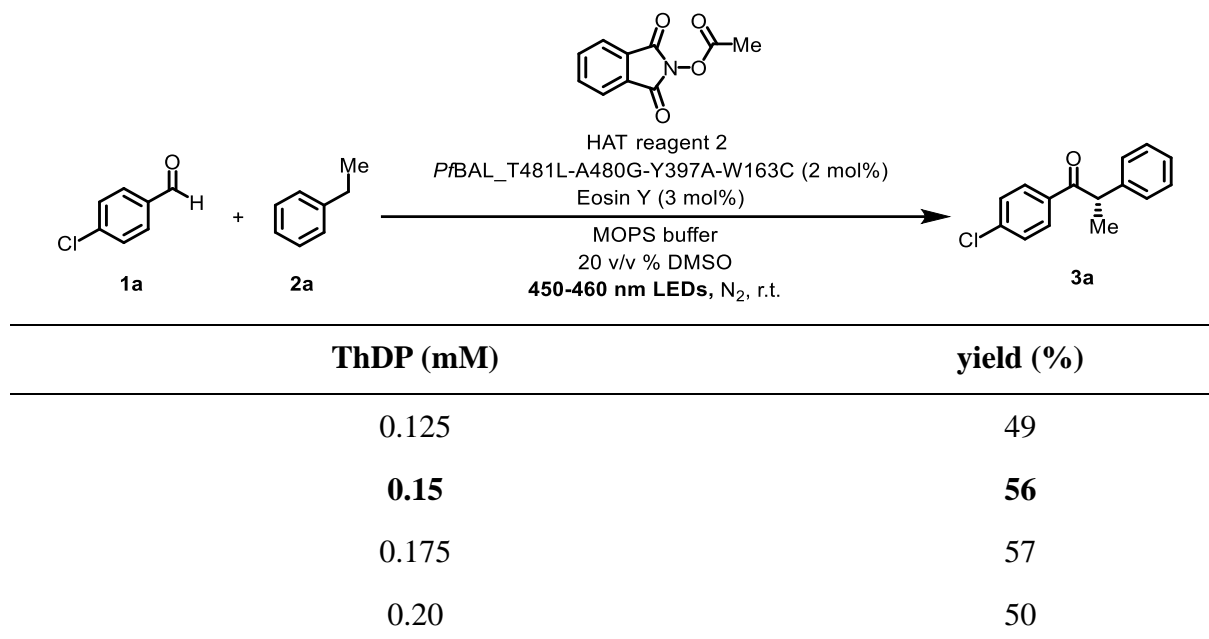

**Supplementary Table 15 | Optimization of the reaction volume.** Conditions: 4-chlorobenzaldehyde **1a** (0.004 mmol), ethylbenzene **2a** (0.016 mmol), HAT reagent 2 (0.020 mmol), *PfBAL\_T481L-A480G-Y397A-W163C* (2 mol%), Eosin Y (3 mol%), 20 v/v % DMSO in 100 mM MOPS buffer (pH 7.5, containing 2.5 mM MgSO<sub>4</sub> and 0.15 mM ThDP) were stirred for 14 h at room temperature under N<sub>2</sub> atmosphere with the irradiation of 450-460 nm LEDs; total volume of the reaction is X  $\mu$ L. The yield was determined by GC.

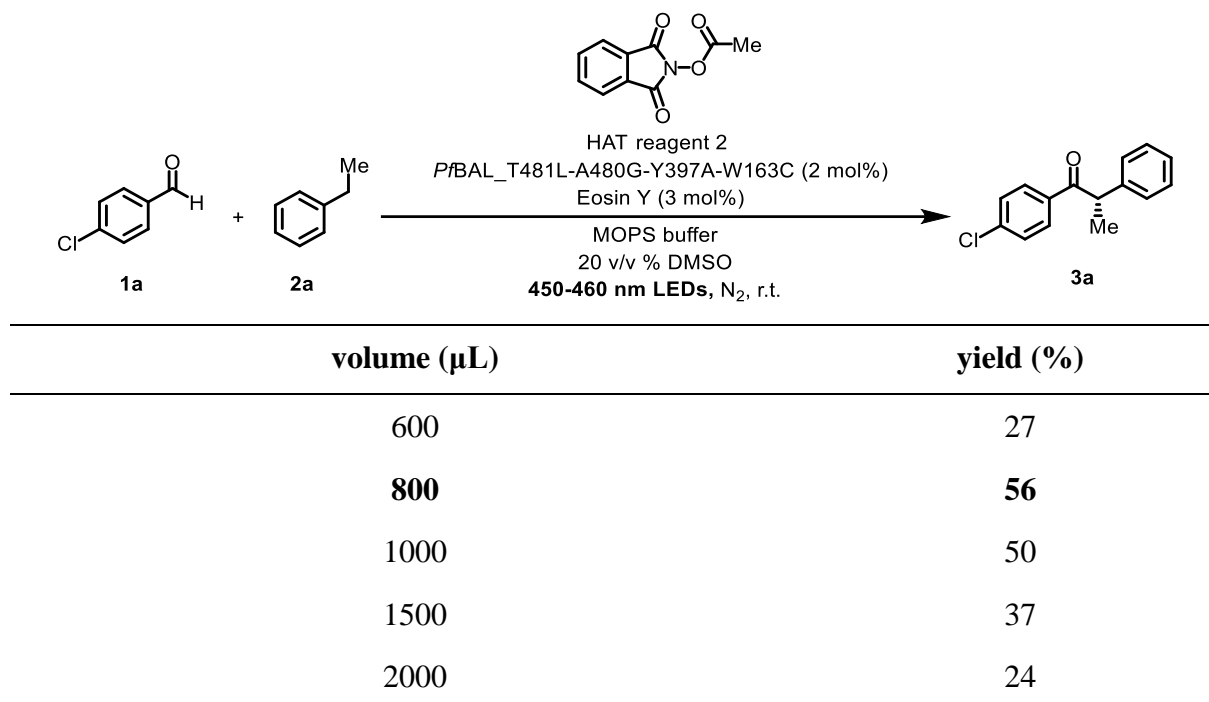



**Supplementary Table 16 | Optimization of the pH.** Conditions: 4-chlorobenzaldehyde **1a** (0.004 mmol), ethylbenzene **2a** (0.016 mmol), HAT reagent 2 (0.020 mmol), *PfBAL\_T481L-A480G-Y397A-W163C* (2 mol%), Eosin Y (3 mol%), 20 v/v % DMSO in 100 mM MOPS buffer (containing 2.5 mM MgSO<sub>4</sub> and 0.15 mM ThDP) were stirred for 14 h at room temperature under N<sub>2</sub> atmosphere with the irradiation of 450-460 nm LEDs; total volume of the reaction is 0.8 mL. The yield was determined by GC.

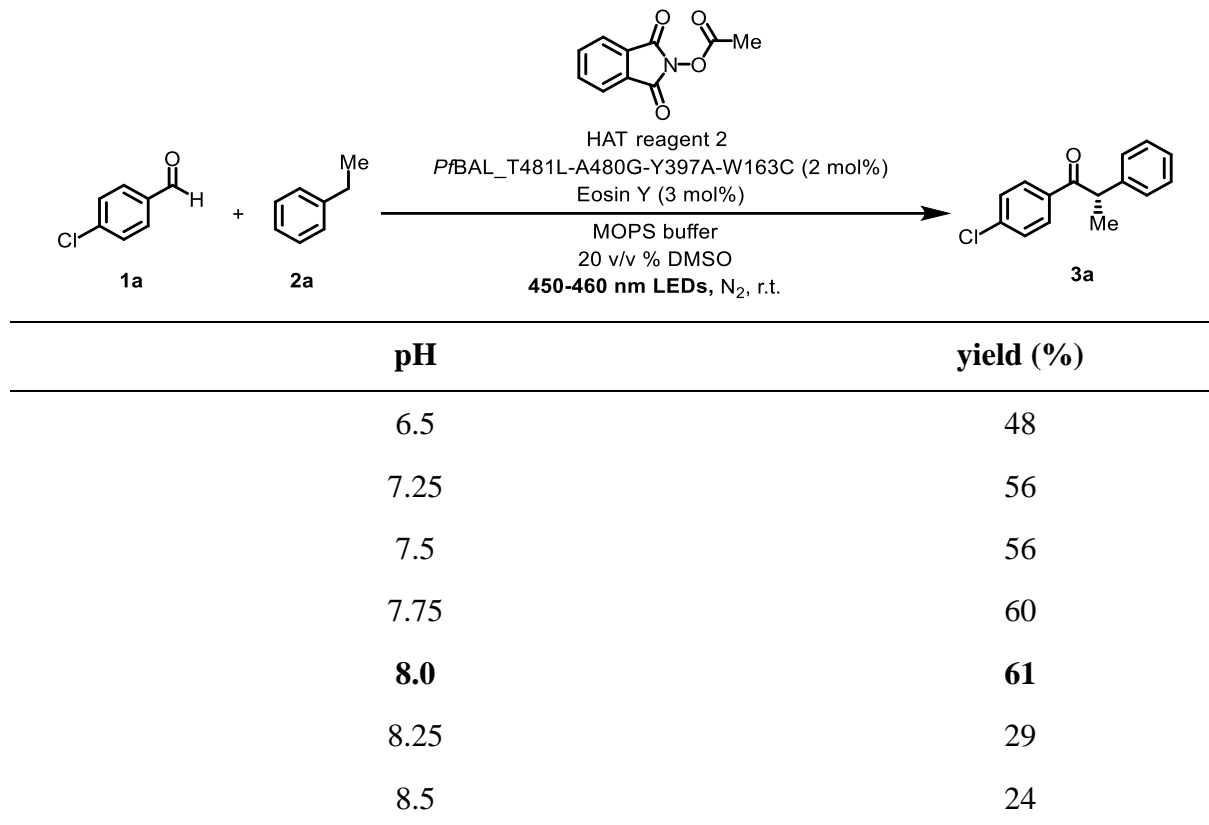

**Supplementary Table 17 | Optimization of the equiv of HAT reagent 2.** Conditions: 4-chlorobenzaldehyde **1a** (0.004 mmol), ethylbenzene **2a** (0.016 mmol), HAT reagent 2 (X equiv), *PfBAL\_T481L-A480G-Y397A-W163C* (2 mol%), Eosin Y (3 mol%), 20 v/v % DMSO in 100 mM MOPS buffer (containing 2.5 mM MgSO<sub>4</sub> and 0.15 mM ThDP) were stirred for 14 h at room temperature under N<sub>2</sub> atmosphere with the irradiation of 450-460 nm LEDs; total volume of the reaction is 0.8 mL. The yield was determined by GC.

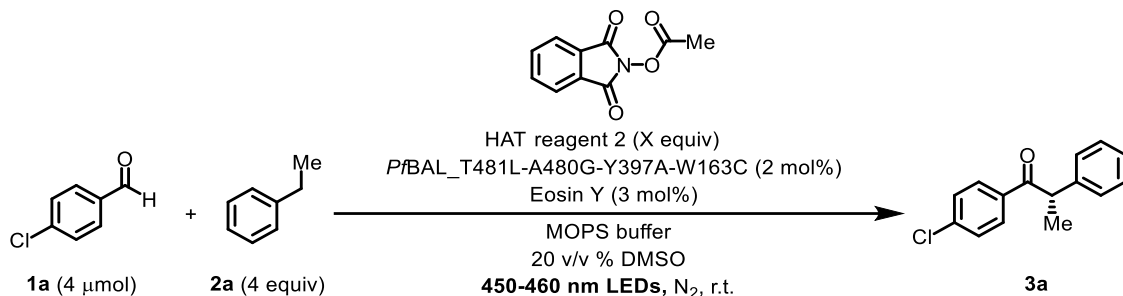

| HAT reagent 2 (equiv) | yield (%) |
|-----------------------|-----------|
| 1.0                   | 18        |
| 2.0                   | 41        |
| 3.0                   | 53        |
| 4.0                   | 55        |
| <b>5.0</b>            | <b>61</b> |

**Supplementary Table 18 | Optimization of the equiv of ethylbenzene.** Conditions: 4-chlorobenzaldehyde **1a** (0.004 mmol), ethylbenzene **2a** (X equiv), HAT reagent 2 (0.020 mmol), *PfBAL\_T481L-A480G-Y397A-W163C* (2 mol%), Eosin Y (3 mol%), 20 v/v % DMSO in 100 mM MOPS buffer (containing 2.5 mM MgSO<sub>4</sub> and 0.15 mM ThDP) were stirred for 14 h at room temperature under N<sub>2</sub> atmosphere with the irradiation of 450-460 nm LEDs; total volume of the reaction is 0.8 mL. The yield was determined by GC.

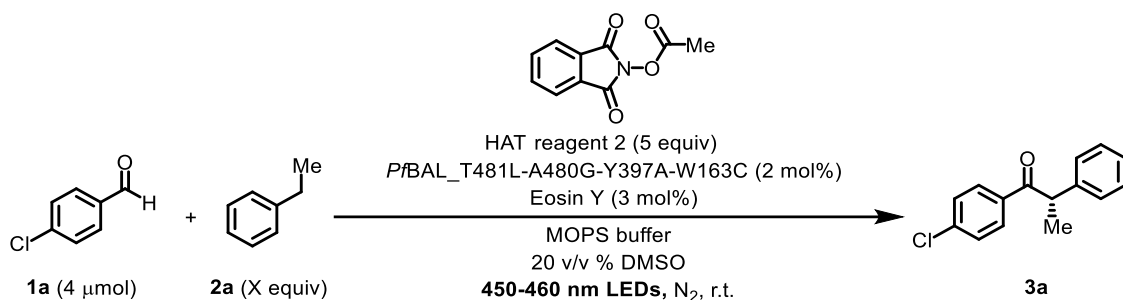

| <b>2a (equiv)</b> | <b>yield (%)</b> |
|-------------------|------------------|
| 1.0               | 10               |
| 2.0               | 45               |
| 3.0               | 52               |
| <b>4.0</b>        | <b>61</b>        |
| 5.0               | 53               |

**Supplementary Table 19 | The control experiments.** Standard conditions: 4-chlorobenzaldehyde **1a** (0.004 mmol), ethylbenzene **2a** (0.016 mmol), HAT reagent 2 (0.020 mmol), *PfBAL\_T481L-A480G-Y397A-W163C* (2 mol%), Eosin Y (3 mol%), 20 v/v % DMSO in 100 mM MOPS buffer (pH 8.0, containing 2.5 mM MgSO<sub>4</sub> and 0.15 mM ThDP) were stirred for 14 h at room temperature under N<sub>2</sub> atmosphere with the irradiation of 450-460 nm LEDs; total volume of the reaction is 0.8 mL. The yield was determined by GC. n.a. = not applicable; n.d. = not determined.

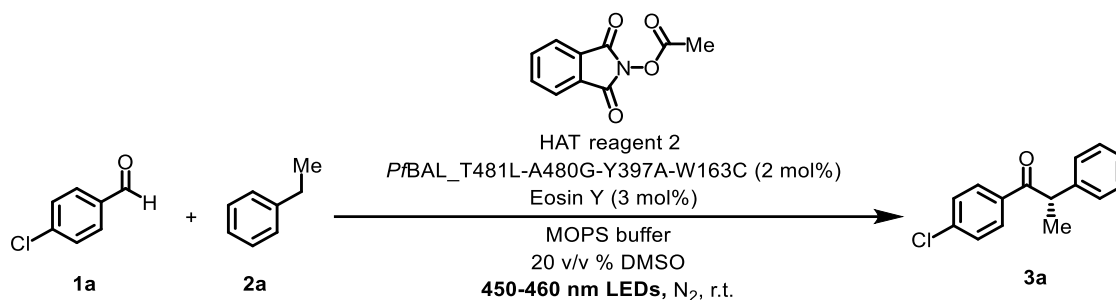

| control experiment                      | yield (%) | ee (%) |
|-----------------------------------------|-----------|--------|
| Standard                                | 61        | 94     |
| No light                                | 0         | n.a.   |
| No Eosin Y                              | 0         | n.a.   |
| No HAT reagent                          | 0         | n.a.   |
| Under air                               | 9         | n.d.   |
| No ThDP                                 | 0         | n.a.   |
| No <i>PfBAL_T481L-A480G-Y397A-W163C</i> | 0         | n.a.   |

**Supplementary Table 20 | Mass balance of the model reaction.** Standard conditions: 4-chlorobenzaldehyde **1a** (0.004 mmol), ethylbenzene **2a** (0.016 mmol), HAT reagent 2 (0.020 mmol), *PfBAL*\_T481L-A480G-Y397A-W163C (2 mol%), Eosin Y (3 mol%), 20 v/v % DMSO in 100 mM MOPS buffer (pH 8.0, containing 2.5 mM MgSO<sub>4</sub> and 0.15 mM ThDP) were stirred for 14 h at room temperature under N<sub>2</sub> atmosphere with the irradiation of 450-460 nm LEDs; total volume of the reaction is 0.8 mL. The yield was determined by LC and referred to **1a**.

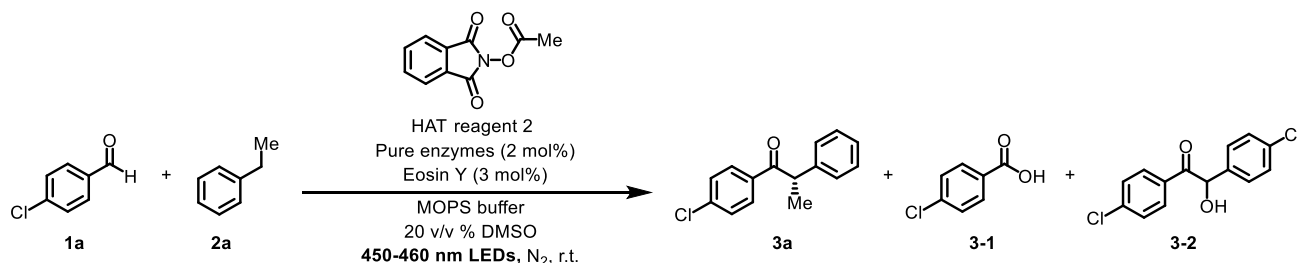

| Enzyme (2 mol%)                       | <b>1a</b> (%) | yield of <b>3a</b> (%)    | yield of <b>3-1</b> (%) | yield of <b>3-2</b> (%) |
|---------------------------------------|---------------|---------------------------|-------------------------|-------------------------|
|                                       | remained      | ee in parenthesis         |                         |                         |
| <i>PfBAL</i>                          | 11            | 13 (19% ee)               | 21                      | 51                      |
| <i>PfBAL</i> _T481L                   | 5             | 28 (78% ee)               | 34                      | 7                       |
| <i>PfBAL</i> _T481L-A480G             | 9             | 19 (92% ee)               | 26                      | 30                      |
| <i>PfBAL</i> _T481L-A480G-Y397A       | 3             | 40 (93% ee)               | 32                      | 11                      |
| <i>PfBAL</i> _T481L-A480G-Y397A-W163C | 3             | 63 (61% GC yield, 94% ee) | 27                      | 5                       |

LC calibration curve for **1a** is displayed below.

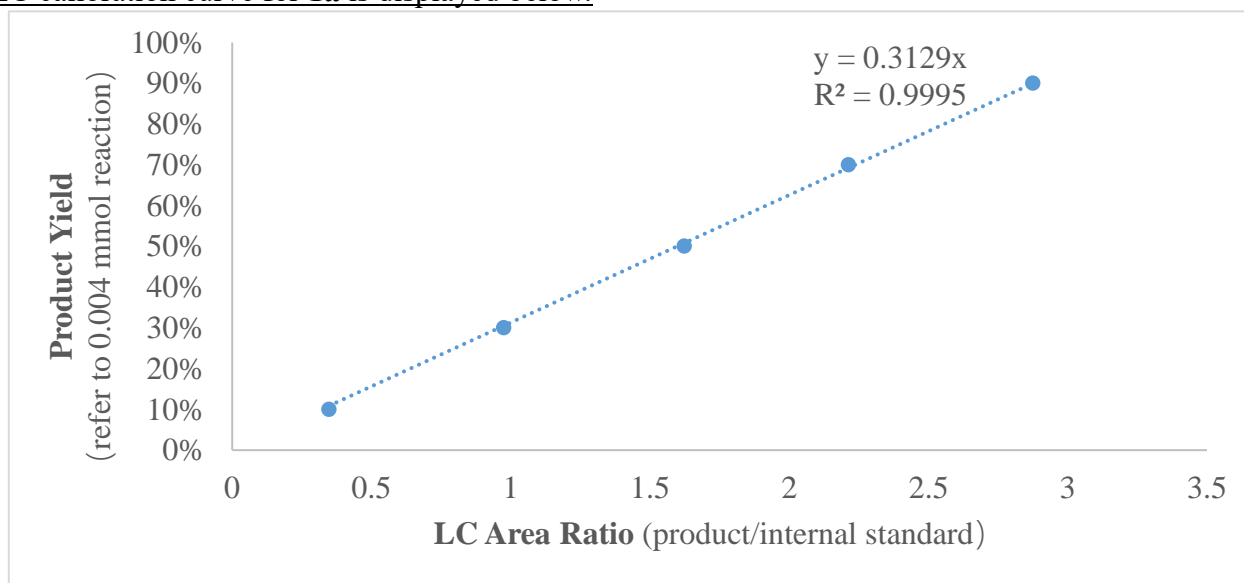

LC calibration curve for **3a** is displayed below.

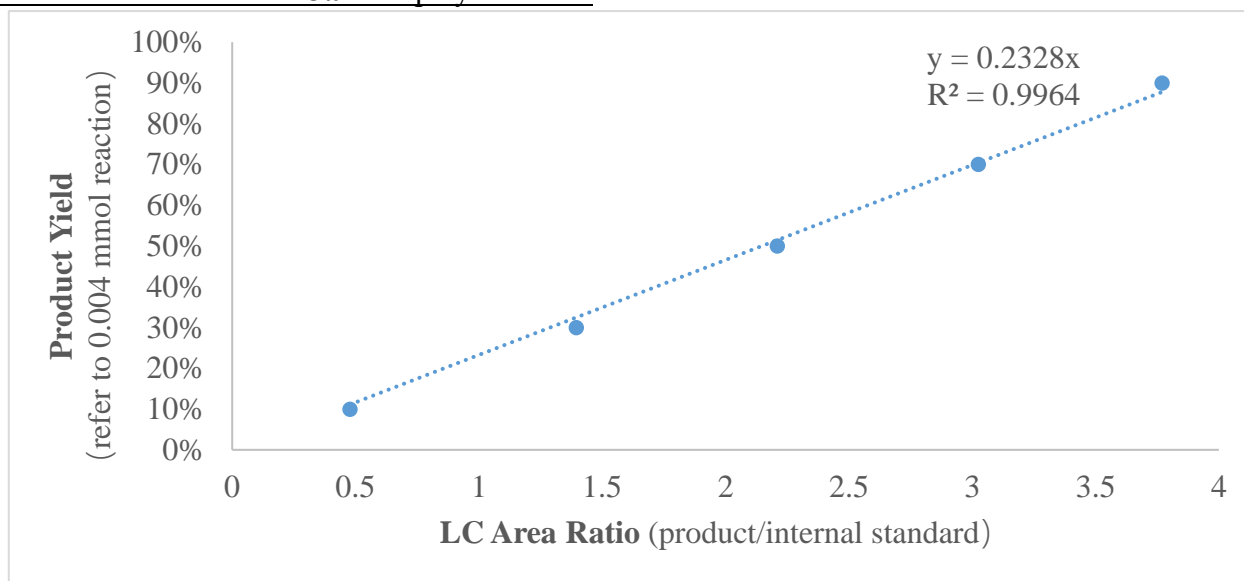

LC calibration curve for **3-1** is displayed below.

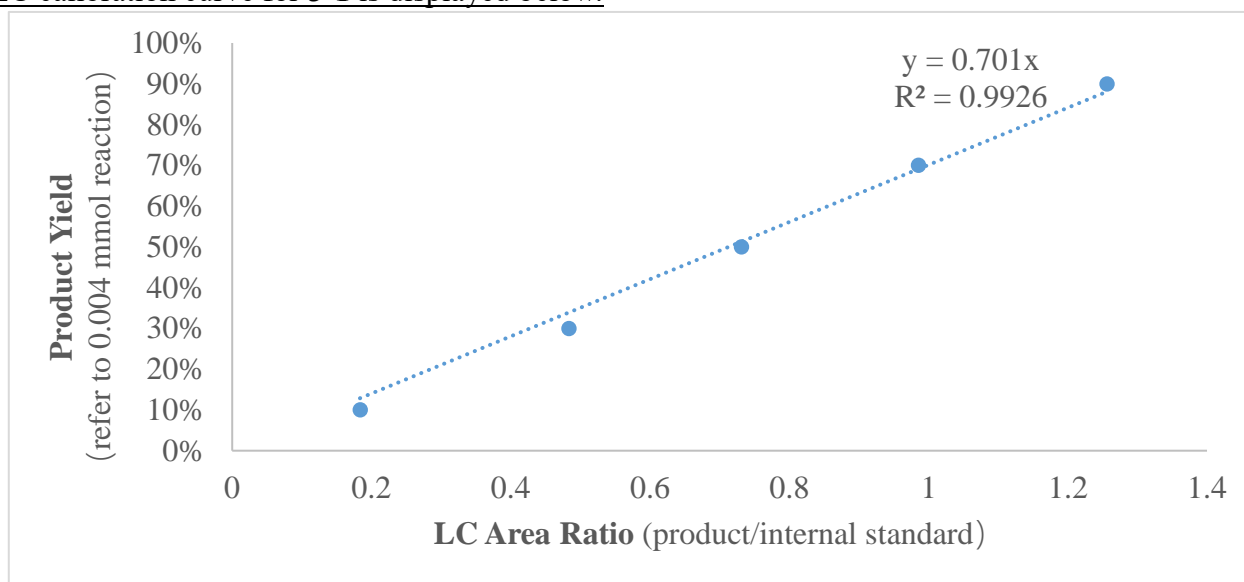

LC calibration curve for 3-2 is displayed below.

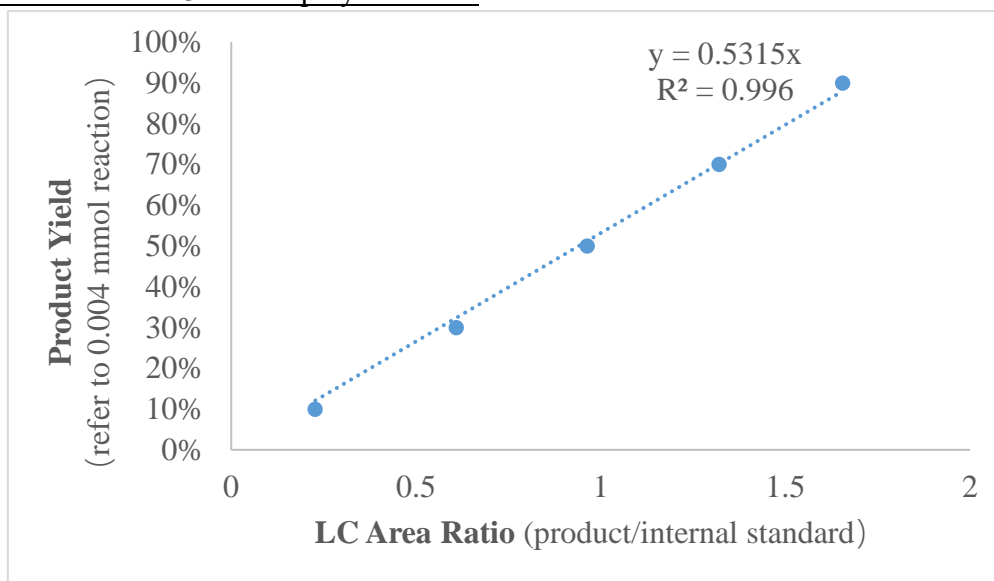

**Supplementary Table 21 | Crystal data and structure refinement for (S)-3g.**

|                                   |                                                                                              |
|-----------------------------------|----------------------------------------------------------------------------------------------|
| Identification code               | <b>3g</b> (CCDC: 2355842)                                                                    |
| Empirical formula                 | C <sub>15</sub> H <sub>13</sub> IO                                                           |
| Formula weight                    | 336.1725                                                                                     |
| Temperature                       | 150.00 K                                                                                     |
| Wavelength                        | 1.54178 Å                                                                                    |
| Crystal system                    | monoclinic                                                                                   |
| Space group                       | P2 <sub>1</sub>                                                                              |
| Unit cell dimensions              | a=6.8885 (2) Å    a = 90°<br>b=10.6012 (4) Å    b = 92.109° (2)<br>c=9.2373 (3) Å    g = 90° |
| Volume                            | 674.11 (4) Å <sup>3</sup>                                                                    |
| Z                                 | 2                                                                                            |
| Density (calculated)              | 1.656 mg/m <sup>3</sup>                                                                      |
| Absorption coefficient            | 18.505 mm <sup>-1</sup>                                                                      |
| F(000)                            | 329.2                                                                                        |
| Crystal size                      | 0.06×0.04×0.02 mm <sup>3</sup>                                                               |
| Theta range for data collection   | 9.58 to 133.14°                                                                              |
| Index ranges                      | -6 ≤ h ≤ 8, -13 ≤ k ≤ 13, -11 ≤ l ≤ 11                                                       |
| Reflections collected             | 4629                                                                                         |
| Independent reflections           | 2162 [R <sub>int</sub> = 0.0432, R <sub>sigma</sub> = 0.0775]                                |
| Completeness to theta = 133.1 °   | 99.1 %                                                                                       |
| Max. and min. transmission        | 0.0853 and 0.0061                                                                            |
| Data/restraints/parameters        | 2162/1/155                                                                                   |
| Goodness-of-fit on F <sup>2</sup> | 0.955                                                                                        |
| Final R indices [I>2σ(I)]         | R1 = 0.0653, wR2 = 0.1401                                                                    |
| R indices (all data)              | R1 = 0.0657, wR2 = 0.1408                                                                    |
| Flack parameters                  | 0.106 (12)                                                                                   |
| Largest diff. peak and hole       | 2.25/-0.88 e.Å <sup>-3</sup>                                                                 |



**Supplementary Table 22 | Crystal data and structure refinement for (S)-3k.**

|                                      |                                                                  |                         |
|--------------------------------------|------------------------------------------------------------------|-------------------------|
| Identification code                  | <b>3k</b> (CCDC: 2358465)                                        |                         |
| Empirical formula                    | $C_{16}H_{16}OS$                                                 |                         |
| Formula weight                       | 256.363                                                          |                         |
| Temperature                          | 150.00 K                                                         |                         |
| Wavelength                           | 1.54178 Å                                                        |                         |
| Crystal system                       | monoclinic                                                       |                         |
| Space group                          | $P2_1$                                                           |                         |
| Unit cell dimensions                 | $a=16.0453$ (4) Å                                                | $a = 90^\circ$          |
|                                      | $b=5.5611$ (1) Å                                                 | $b = 114.662^\circ$ (1) |
|                                      | $c=16.4961$ (3) Å                                                | $g = 90^\circ$          |
| Volume                               | 1337.68 (5) Å <sup>3</sup>                                       |                         |
| Z                                    | 4                                                                |                         |
| Density (calculated)                 | 1.273 mg/m <sup>3</sup>                                          |                         |
| Absorption coefficient               | 2.011 mm <sup>-1</sup>                                           |                         |
| F(000)                               | 546.8                                                            |                         |
| Crystal size                         | 0.3×0.2×0.1 mm <sup>3</sup>                                      |                         |
| Theta range for data collection      | 5.9 to 149.4°                                                    |                         |
| Index ranges                         | $-20 \leq h \leq 18$ , $-6 \leq k \leq 6$ , $-20 \leq l \leq 20$ |                         |
| Reflections collected                | 11980                                                            |                         |
| Independent reflections              | 5125 [ $R_{int} = 0.0313$ , $R_{sigma} = 0.0444$ ]               |                         |
| Completeness to theta = 135.4 °      | 99.8 %                                                           |                         |
| Max. and min. transmission           | 0.0872 and 0.0106                                                |                         |
| Data/restraints/parameters           | 5125/1/329                                                       |                         |
| Goodness-of-fit on F <sup>2</sup>    | 1.116                                                            |                         |
| Final R indices [ $I > 2\sigma(I)$ ] | $R1 = 0.0653$ , $wR2 = 0.1474$                                   |                         |
| R indices (all data)                 | $R1 = 0.0667$ , $wR2 = 0.1490$                                   |                         |
| Flack parameters                     | 0.045 (12)                                                       |                         |
| Largest diff. peak and hole          | 0.51/-0.20 e.Å <sup>-3</sup>                                     |                         |

**Supplementary Table 23 | Crystal data and structure refinement for (S)-3q.**

|                                   |                                                               |                 |  |
|-----------------------------------|---------------------------------------------------------------|-----------------|--|
| Identification code               | <b>3q</b> (CCDC: 2416063)                                     |                 |  |
| Empirical formula                 | C <sub>20</sub> H <sub>17</sub> NO                            |                 |  |
| Formula weight                    | 287.362                                                       |                 |  |
| Temperature                       | 193 K                                                         |                 |  |
| Wavelength                        | 1.54178 Å                                                     |                 |  |
| Crystal system                    | monoclinic                                                    |                 |  |
| Space group                       | P2 <sub>1</sub>                                               |                 |  |
| Unit cell dimensions              | a=5.6914 (2) Å                                                | a = 90°         |  |
|                                   | b=15.3437 (1) Å                                               | b = 98.867° (2) |  |
|                                   | c=17.7428 (5) Å                                               | g = 90°         |  |
| Volume                            | 1530.91 (9) Å <sup>3</sup>                                    |                 |  |
| Z                                 | 4                                                             |                 |  |
| Density (calculated)              | 1.247 mg/m <sup>3</sup>                                       |                 |  |
| Absorption coefficient            | 0.597 mm <sup>-1</sup>                                        |                 |  |
| F(000)                            | 608.0                                                         |                 |  |
| Crystal size                      | 0.13×0.12×0.1 mm <sup>3</sup>                                 |                 |  |
| Theta range for data collection   | 5.04° to 136.916°                                             |                 |  |
| Index ranges                      | -6 ≤ h ≤ 6, -18 ≤ k ≤ 17, -21 ≤ l ≤ 21                        |                 |  |
| Reflections collected             | 22456                                                         |                 |  |
| Independent reflections           | 5531 [R <sub>int</sub> = 0.0719, R <sub>sigma</sub> = 0.0556] |                 |  |
| Completeness to theta = 135.4 °   | 100 %                                                         |                 |  |
| Max. and min. transmission        | 0.753 and 0.678                                               |                 |  |
| Data/restraints/parameters        | 5531/1/400                                                    |                 |  |
| Goodness-of-fit on F <sup>2</sup> | 1.037                                                         |                 |  |
| Final R indices [I>2σ(I)]         | R1 = 0.0555, wR2 = 0.1344                                     |                 |  |
| R indices (all data)              | R1 = 0.0831, wR2 = 0.1622                                     |                 |  |
| Flack parameters                  | -0.2 (2)                                                      |                 |  |
| Largest diff. peak and hole       | 0.33/-3.4 e.Å <sup>-3</sup>                                   |                 |  |

**Supplementary Table 24 | List of primers used in the study.**

| <b>Sequence of primers using for Glycine Scan (Based on pET28a-T481L_A480G)</b> |                                       |
|---------------------------------------------------------------------------------|---------------------------------------|
| H26G_F                                                                          | TGTTTCGGCCTG <u>GGC</u> GGTGCGCATAT   |
| A28G_F                                                                          | GCCTGCACGGT <u>GGT</u> CATATTGATACC   |
| H29G_F                                                                          | TGCACGGTGCG <u>GGT</u> ATTGATACCATCT  |
| silent primer_R (H29, A28, H29)                                                 | ATCTGGACGCGCGCCGTGC                   |
| A74G_F                                                                          | TGGCGCTGGTGACG <u>GGT</u> TGGCGGCGGTT |
| silent primer_R (A74)                                                           | AAAACCGGCACGCCGGTAG                   |
| L112G_F                                                                         | AAACCAACACC <u>GGT</u> CAGGCGGGCATT   |
| Q113_F                                                                          | ACCAACACCTTAG <u>GGT</u> TGCGGGCATTGA |
| silent primer_R (L112, Q113)                                                    | TCAGCACCAGATCCGCGGGCGG                |
| W163_F                                                                          | TCATCAGGATGTC <u>GCCC</u> GGCAGATCC   |
| silent primer_R (W163)                                                          | TGGCAATGATCACCGGTGGT                  |
| Y239G_F                                                                         | AGACAGACCTTC <u>GCCG</u> TCCGCGAAAA   |
| silent primer_R (Y239)                                                          | GTTTTACCAACGCGGTGA                    |
| N283G_F                                                                         | ACCGTGACCGGT <u>GCCC</u> CAGGCCGAAA   |
| silent primer_R (N283)                                                          | TGCGATGGCGGCGCCTAT                    |
| A394G_F                                                                         | AGGTAGGTCAG <u>ACC</u> ACCATCCGCCA    |
| Y397G_F                                                                         | AGACAGCCACAG <u>GCCG</u> GTGAGAGCAC   |
| silent primer_R (A394, Y397)                                                    | CGTGCCGGTTTTTCGCGGA                   |
| C414G_F                                                                         | CAGGTAGCCGTG <u>GCCC</u> CAGGAAGCCACC |
| Y417G_F                                                                         | TGCTGCCCAG <u>ACCG</u> CCGTGGCAC      |
| L418G_F                                                                         | CCATGCTGCC <u>ACCG</u> TAGCCGTGG      |
| M421G_F                                                                         | AAACCAACGCC <u>ACCG</u> CTGCCCAGG     |
| silent primer_R (C414, Y417, L418, M421)                                        | CGGTCTGGTTCAGAACCTGTAC                |
| F484G_F                                                                         | CCAGCTGCTG <u>ACCG</u> TGCAGCAGA      |
| silent primer_R (F484)                                                          | GATGTTGGCGGCACCATCGAA                 |

| <b>Sequence of primers using for W163, N283, Y397, H26, Q113, Y239 and C414 mutagenesis (Based on pET28a-T481L-A480G)</b> |                                        |
|---------------------------------------------------------------------------------------------------------------------------|----------------------------------------|
| N283_ATG_F                                                                                                                | GTTTCGGCCTG <u>ATG</u> ACCGGTCACGGT    |
| N283_NDT_F                                                                                                                | GTTTCGGCCTG <u>NDT</u> ACCGGTCACGGT    |
| N283_TGG_F                                                                                                                | GTTTCGGCCTG <u>TGG</u> ACCGGTCACGGT    |
| N283_VMA_F                                                                                                                | GTTTCGGCCTG <u>VMA</u> ACCGGTCACGGT    |
| silent primer_R (N283)                                                                                                    | GTAACGAGGATGGTACGACGG                  |
| W163_ATG_F                                                                                                                | TGGATCTGCCG <u>ATG</u> GACATCCTGATG    |
| W163_NDT_F                                                                                                                | TGGATCTGCCG <u>NDT</u> GACATCCTGATG    |
| W163_VMA_F                                                                                                                | TGGATCTGCCG <u>VMA</u> GACATCCTGATG    |
| silent primer_R (W163)                                                                                                    | ATGGTGCCGCCAACATCC                     |
| Y397_ATG_F                                                                                                                | TGCTCTGACC <u>ATG</u> CTGTGGCTGTCTG    |
| Y397_NDT_F                                                                                                                | TGCTCTGACC <u>NDT</u> CTGTGGCTGTCTG    |
| Y397_TGG_F                                                                                                                | TGCTCTGACC <u>TGG</u> CTGTGGCTGTCTG    |
| Y397_VMA_F                                                                                                                | TGCTCTGACC <u>VMA</u> CTGTGGCTGTCTG    |
| silent primer_R (Y397)                                                                                                    | CCATACCGATCAGGATCAG                    |
| C414A_F                                                                                                                   | AGGTAGCCGTG <u>TGCC</u> CAGGAAGCCAC    |
| C414F_F                                                                                                                   | AGGTAGCCGTG <u>GAA</u> CAGGAAGCCAC     |
| C414I_F                                                                                                                   | AGGTAGCCGTG <u>GAT</u> CAGGAAGCCAC     |
| C414L_F                                                                                                                   | AGGTAGCCGTG <u>CAG</u> CAGGAAGCCAC     |
| C414V_F                                                                                                                   | AGGTAGCCGTG <u>AACC</u> CAGGAAGCCAC    |
| silent primer_R (C414)                                                                                                    | ATGCGTGCGGTCTGGTTC                     |
| H26A_F                                                                                                                    | TGTTTCGGCCTG <u>GCA</u> GGTGCGCATATTG  |
| H26F_F                                                                                                                    | TGTTTCGGCCTG <u>TTC</u> GGTGCGCATATTG  |
| H26I_F                                                                                                                    | TGTTTCGGCCTG <u>ATC</u> GGTGCGCATATTG  |
| H26L_F                                                                                                                    | TGTTTCGGCCTG <u>CTG</u> GGTGCGCATATTG  |
| H26V_F                                                                                                                    | TGTTTCGGCCTG <u>GTT</u> GGTGCGCATATTG  |
| silent primer_R (H26)                                                                                                     | ACGCGCGCCGTGCGCAG                      |
| Q113A_F                                                                                                                   | ACCAACACCTTAG <u>GCA</u> GCGGGCATTGATC |

|                                                                                                     |                                       |
|-----------------------------------------------------------------------------------------------------|---------------------------------------|
| Q113F_F                                                                                             | ACCAACACCTTA <u>TTC</u> GCGGGCATTGATC |
| Q113I_F                                                                                             | ACCAACACCTTA <u>ATC</u> GCGGGCATTGATC |
| Q113L_F                                                                                             | ACCAACACCTTA <u>CTG</u> GCGGGCATTGATC |
| Q113V_F                                                                                             | ACCAACACCTTA <u>GTT</u> GCGGGCATTGATC |
| silent primer_R (Q113)                                                                              | AGCATCAGCACCAGATCCG                   |
| Y239A_F                                                                                             | TTTTCGCGGAC <u>GCA</u> GAAGGTCTGTC    |
| Y239F_F                                                                                             | TTTTCGCGGAC <u>TTC</u> GAAGGTCTGTC    |
| Y239I_F                                                                                             | TTTTCGCGGAC <u>ATC</u> GAAGGTCTGTC    |
| Y239L_F                                                                                             | TTTTCGCGGAC <u>CTG</u> GAAGGTCTGTC    |
| Y239V_F                                                                                             | TTTTCGCGGAC <u>GTT</u> GAAGGTCTGTC    |
| silent primer_R (Y239)                                                                              | TCAGACAGCCACAGGTAGG                   |
| <b>Sequence of primers using for W163 and H26 mutagenesis (Based on pET28a-T481L_A480G_Y397A/G)</b> |                                       |
| H26_ATG_F                                                                                           | ATATGCGCACCC <u>CAT</u> CAGGCCGAAC    |
| H26_NDT_F                                                                                           | ATATGCGCACCC <u>AHN</u> CAGGCCGAAC    |
| H26_TGG_F                                                                                           | ATATGCGCACCC <u>CCAC</u> CAGGCCGAAC   |
| H26_VMA_F                                                                                           | ATATGCGCACCC <u>TKB</u> CAGGCCGAAC    |
| H26A_F                                                                                              | ATATGCGCACCC <u>CGC</u> CAGGCCGAAC    |
| H26E_F                                                                                              | ATATGCGCACCC <u>TTCC</u> CAGGCCGAAC   |
| H26R_F                                                                                              | ATATGCGCACCC <u>GCG</u> CAGGCCGAAC    |
| H26T_F                                                                                              | ATATGCGCACCC <u>GGT</u> CAGGCCGAAC    |
| H26Y_F                                                                                              | ATATGCGCACCC <u>GTAC</u> CAGGCCGAAC   |
| silent primer_R (H26)                                                                               | attcgatggtgtccggga                    |
| W163_ATG_F                                                                                          | TGGATCTGCCG <u>ATG</u> GACATCCTGATG   |
| W163_NDT_F                                                                                          | TGGATCTGCCG <u>NDT</u> GACATCCTGATG   |
| W163_VMA_F                                                                                          | TGGATCTGCCG <u>VMA</u> GACATCCTGATG   |
| W163N_F                                                                                             | GATCTGCCG <u>AAC</u> GACATCCTGA       |
| W163P_F                                                                                             | GATCTGCCG <u>CCG</u> GACATCCTGA       |
| W163Q_F                                                                                             | GATCTGCCG <u>CAG</u> GACATCCTGA       |

|                        |                                  |
|------------------------|----------------------------------|
| W163S_F                | GATCTGCCCG <u>TCC</u> GACATCCTGA |
| silent primer_R (W163) | GATGGTGCCGCCAACATC               |

**Supplementary Table 25 | Molecular dynamics trajectory clustering analysis.** Cluster: indicates the identifier of each cluster. Frames: represents the number of frames assigned to each cluster. Frac: shows the fraction of total frames that belong to each cluster. AvgDist: the average distance between frames and the centroid of the cluster. Stdev: the standard deviation of the distances between frames and the cluster centroid. Centroid: the position of the cluster centroid, representing the average state of all frames in the cluster. AvgCDist: the average distance between the centroid of the current cluster and the centroids of all other clusters.

| Cluster | Frames | Frac  | AvgDist | Stdev | Centroid | AvgCDist |
|---------|--------|-------|---------|-------|----------|----------|
| 0       | 2280   | 0.456 | 1.862   | 0.203 | 4033     | 1.359    |
| 1       | 1380   | 0.276 | 1.837   | 0.191 | 2197     | 1.183    |
| 2       | 1340   | 0.268 | 1.949   | 0.249 | 672      | 1.246    |

## Supplementary Methods

### 1. General Information

0.004 mmol (or 0.1 mmol) catalytic reactions were performed in a 4 mL clear glass vial (or a 200 mL Schlenk flask) with a magnetic stirring, illuminated with one (or two) 450-460 nm LEDs, stirred for 14 h with one (or two) cooling fan (Supplementary Fig. 1).

Unless otherwise noted, reagents were purchased from commercial suppliers, such as Energy Chemical and Aladdin, and used without further purification. Flash column chromatography was performed with ultrapure silica gel SiliaFlash<sup>®</sup> P60 (irregularly shaped, 200-300 mesh). <sup>1</sup>H NMR, and proton decoupled <sup>13</sup>C NMR spectra were recorded on a BRUKER AVANCE III 400 MHz NMR spectrometer at ambient temperature. NMR standards were used as follows: <sup>1</sup>H NMR spectroscopy:  $\delta$  = 0.00 ppm (tetramethylsilane, TMS), <sup>13</sup>C NMR spectroscopy:  $\delta$  = 77.0 ppm (CDCl<sub>3</sub>). <sup>1</sup>H NMR coupling constants were reported in Hz, and multiplicity was indicated as follows: s (singlet); d (doublet); t (triplet); q (quartet); m (multiplet); dd (doublet of doublets); td (triplet of doublets). High-resolution mass spectra (HRMS) were conducted at Thermo Fisher Micromass instrument with an electrospray ionization time-of-flight (ESI-TOF) detector. The GC-MS system is consisted of an Agilent 8860 (Agilent Inc, Palo Alto, CA, USA) gas chromatograph (unless noted DB-5MS UI column was used, length 30 m, inner diameter 0.25 mm, film thickness 0.25  $\mu$ m) and an Agilent 5977B mass selective detector (positive electron impact mode, EI). An Agilent 8860 gas chromatograph (HP-5 column, length 30 m, inner diameter 0.32 mm, film thickness 0.25  $\mu$ m) with a FID detector was used for yield determination. Enantiomeric purities of the enzymatic products were determined with a 25 cm Daicel Chiralpak AS-H column, a 25 cm Daicel Chiralpak AD-3 column, a 25 cm Daicel Chiralcel OJ-H column or a 25 cm Daicel Chiralcel OJ-3 column on an Agilent 1290 Infinity II system using *n*-hexane/isopropanol as the mobile phase.

*E. coli* DH5 $\alpha$  cells, and *E. coli* BL21 (DE3) strains were purchased from GenScript Biotech Co., Ltd (Nanjing, China). Restriction enzymes were purchased from Beyotime Biotech. (Shanghai, China). Kanamycin, isopropyl- $\beta$ -D-thiogalactoside (IPTG), tryptone and yeast extract were obtained from Sangon Biotech Co., Ltd (Shanghai, China).

All genes were synthesized by Sangon Biotech Co., Ltd (Shanghai, China). *PpBFD*, *PfBAL*, *CDH*, *EcMenD*, *EcTK*, *LKdcA* and *PaBAL* were cloned into pET28a (+) vector with the *NcoI* and *XhoI* restriction sites and C-terminal 6xHis tag.



## 2. Expression, Purification, and Concentration Determination of Enzymes

For the expression of *PfBAL*, an *E. coli* BL21 (DE3) single colony harbouring pET28a-*PfBAL* was inoculated in 6 mL LB medium containing 50 µg/mL kanamycin and grown at 37 °C, 250 rpm, for 12-14 h. The overnight culture was transferred into 600 mL TB medium containing 50 µg/mL kanamycin, which was then grown at 37 °C until OD<sub>600</sub> = 0.6-0.8. Isopropyl-β-D-thiogalactoside (IPTG) was added into the culture to a final concentration of 0.5 mM. The cells were induced at 25 °C for 16 h, then harvested by centrifugation (8000 rpm, 4 °C, 15 min) and the supernatant was removed and resuspended in binding buffer (50 mM Tris-HCl, 300 mM NaCl, pH 7.5) at 2.5 mL per gram wet cells. Subsequently, the cells were sonicated for 40 min (10 sec on, 10 sec off) and centrifuged (12000 rpm, 1 h, 4 °C). Purification of the soluble his6-tagged fusion protein from supernatant was performed by using HisTrap column fitted to an ÄKTExpress FPLC system (GE Health Life Sciences, Pittsburgh, PA). The fractions containing target proteins were collected and buffer exchanged with Kpi buffer (50 mM, pH 7.5) with an Amicon Ultra concentration tube with 50 kDa cut-off. After that, the proteins were stored in 10 v/v % glycerol as 100 µL aliquots at -80 °C. The concentration of enzymes was determined by the absorption at 280 nm.

The DNA sequence of wild-type *PfBAL*

ATGGCAATGATCACCGGTGGTGAACCTGGTTGTTTCGTACCCTGATCAAAGCTGGTGTGGA  
ACACCTGTTTCGGCCTGCACGGTGCGCATATTGATACCATCTTCCAGGCGTGCCTGGATCA  
CGATGTGCCGATCATCGATACTCGCCATGAAGCTGCGGGCGGGCCACGCGGCTGAAGGTT  
ACGCTCGTGCGGGTGCTAAACTGGGTGTGGCGCTGGTGACGGCGGGCGGCGGTTTAC  
CAACGCGGTGACCCCGATCGCGAACGCGTGGCTGGATCGTACCCCGGTTCTGTTCTGA  
CCGGTAGCGGTGCCCTGCGCGATGATGAAACCAACACCTTACAGGCGGGCATTGATCAG  
GTTGCGATGGCGGCGCCTATTACTAAATGGGCGCACCGCGTGATGGCTACCGAACACAT  
CCCGCGTCTGGTGATGCAGGCGATCCGCGCAGCTCTGAGCGCGCCGCGCGGCCCGGTTTC  
TGCTGGATCTGCCGTGGGACATCCTGATGAACCAGATCGATGAAGATTCCGTGATCATTC  
CAGATCTGGTTCTGTCTGCGCACGGCGCGCGTCCAGATCCGGCGGACCTGGATCAGGCG  
CTGGCTCTGCTGCGCAAAGCGGAACGCCCGGTTATCGTGCTGGGTTCTGAAGCGTCCCG  
TACCGCCCGTAAAACCGCGCTGTCCGCGTTCGTGGCGGCTACCGGCGTGCCGGTTTTTCG  
CGGACTACGAAGGTCTGTCTATGCTGAGCGGCCTGCCGGATGCAATGCGTGGCGGTCTG  
GTTTCAGAACCTGTACAGCTTCGCTAAAGCAGACGCCGCCCGGATCTGGTGCTGATGCT  
GGGCGCACGTTTCGGCCTGAACACCGGTACCGTTCCGGCCAGCTGATCCCGCACTCTG  
CGCAGGTGATCCAGGTTGATCCGGACGCATGTGAACTGGGCCGCTTACAGGGCATCGCT  
CTGGGCATCGTGCGGATGTTGGCGGCACCATCGAAGCACTGGCTCAGGCAACCGCTC  
AGGATGCGGCGTGGCCGGATCGTGGCGATTGGTGCGCGAAAGTGACCGATCTGGCCCA  
GGAACGCTACGCGTCGATCGCGGCTAAAAGCAGCTCCGAACACGCGCTGCACCCGTTTC  
CACGCAAGCCAGGTTATTGCAAACACGTTGATGCTGGTGTACCGTGGTGGCGGATGG  
TGCTCTGACCTACCTGTGGCTGTCTGAAGTGATGAGCCGTGTTAAACCGGGTGGCTTCC  
TGTGCCACGGCTACCTGGGCAGCATGGGCGTTGGTTTTGGCACCGCCCTGGGCGCGCAG  
GTTGCAGACCTGGAAGCTGGCCGTCGTACCATCCTCGTTACCGGCGACGGCTCCGTTGG  
CTACAGCATCGGCGAATTTGACACCCTGGTGCGTAAACAGCTGCCGCTGATCGTTATCAT  
CATGAACAACCAGAGCTGGGGTGCGACCCTGCACTTCCAGCAGCTGGCGGTTGGTCCG  
AACCGCGTGACCGGCACCCGTCTGGAAAACGGCTCTTACCACGGCGTGGCGGCGGCGT  
TCGGTGCTGATGGTTACCACGTGGATAGCGTTGAATCCTTCTCTGCGGCGCTGGCTCAGG  
CTCTGGCACACAACCGTCCGGCTTGCATCAACGTTGCGGTTGCGCTGGACCCGATCCCG  
CCGGAAGAACTGATCCTGATCGGTATGGACCCGTTTCGCGGctcgagcaccaccaccaccactga

The protein sequence of wild-type *PfBAL*

MAMITGGELVVRTLKAGVEHLFGLHGAHIDTIFQACLDHDVPIIDTRHEAAAGHAAEGYA  
RAGAKLGVALVTAGGGFTNAVTPIANAWLDRTPVLFLTGSGALRDETNLQAGIDQVAM  
AAPITKWAHRVMATEHIPRLVMQAIRAALSAPRGPVLLDLPWDILMNQIDEDSVIIPDLVLS  
AHGARPD PADLDQALALLRKAERPVIVLGSEASRTARKTALS AFVAATGVPVFADYEGLSM  
LSGLPDAMRGGVLVQNLVSFAKADAAPDLVLM LGARFGLNTGHGSGQLIPHS AQVIQVDPD  
ACELGRLQGIALGIVADVGGTIEALAQAQDAAWPDRGDWCAKVTDLAQERYASIAAKS  
SSEHALHPFHASQVIAKHVDAGVTVVADGALTYLWLSEVMSRVKPGGFLCHGYLGSMGV  
GFGTALGAQVADLEAGRRTILVTGDGSVGYSIGFDTLVRKQLPLIVIIMNNQSWGATLHFQ  
QLAVGPNRVTGTRLENGSYHGVAAAFGADGYHVD SVESFSAALAQALAHNRPACINVAVA  
LDPIPEELILIGMDPFALEHHHHHH

The DNA sequence of *PfBAL* T481L

ATGGCAATGATCACCGGTGGTGAACCTGGTTGTTTCGTACCCTGATCAAAGCTGGTGTGGA

ACACCTGTTCGGCCTGCACGGTGCGCATATTGATAACCATCTTCCAGGCGTGCCTGGATCA  
CGATGTGCCGATCATCGATACTCGCCATGAAGCTGCGGCGGGCCACGCGGCTGAAGGTT  
ACGCTCGTGCGGGTGCTAAACTGGGTGTGGCGCTGGTGACGGCGGGCGGCGGTTTTAC  
CAACGCGGTGACCCCGATCGCGAACGCGTGGCTGGATCGTACCCCGGTTCTGTTCTCTGA  
CCGGTAGCGGTGCCCTGCGCGATGATGAAACCAACACCTTACAGGCGGGCATTGATCAG  
GTTGCGATGGCGGCGCCTATTACTAAATGGGCGCACCGCGTGATGGCTACCGAACACAT  
CCCGCGTCTGGTGATGCAGGCGATCCGCGCAGCTCTGAGCGCGCCGCGCGGCCCCGGTTC  
TGCTGGATCTGCCGTGGGACATCCTGATGAACCAGATCGATGAAGATTCCGTGATCATTC  
CAGATCTGGTTCTGTCTGCGCACGGCGCGCGTCCAGATCCGGCGGACCTGGATCAGGCG  
CTGGCTCTGCTGCGCAAAGCGGAACGCCCCGGTTATCGTGCTGGGTTCTGAAGCGTCCCG  
TACCGCCCGTAAAACCGCGCTGTCCGCGTTCGTGGCGGCTACCGGCGTGCCGGTTTTTCG  
CGGACTACGAAGGTCTGTCTATGCTGAGCGGCCTGCCGGATGCAATGCGTGGCGGTCTG  
GTTCAGAACCTGTACAGCTTCGCTAAAGCAGACGCCGCCCGGATCTGGTGCTGATGCT  
GGGCGCACGTTTCGGCCTGAACACCGGTACCGTTCCGGCCAGCTGATCCCGCACTCTG  
CGCAGGTGATCCAGGTTGATCCGGACGCATGTGAACTGGGCCGCTTACAGGGCATCGCT  
CTGGGCATCGTGGCGGATGTTGGCGGCACCATCGAAGCACTGGCTCAGGCAACCGCTC  
AGGATGCGGCGTGGCCGGATCGTGGCGATTGGTGCGCGAAAGTGACCGATCTGGCCCA  
GGAACGCTACGCGTCGATCGCGGCTAAAAGCAGCTCCGAACACGCGCTGCACCCGTTTC  
CACGCAAGCCAGGTTATTGCAAAACACGTTGATGCTGGTGTTACCGTGGTGGCGGATGG  
TGCTCTGACCTACCTGTGGCTGTCTGAAGTGATGAGCCGTGTTAAACCGGGTGGCTTCC  
TGTGCCACGGCTACCTGGGCAGCATGGGCGTTGGTTTTGGCACCGCCCTGGGCGCGCAG  
GTTGCAGACCTGGAAGCTGGCCGTCGTACCATCCTCGTTACCGGCGACGGCTCCGTTGG  
CTACAGCATCGGCGAATTTGACACCCTGGTGCGTAAACAGCTGCCGCTGATCGTTATCAT  
CATGAACAACCAGAGCTGGGGTGCG**CTG**CTGCACTTCCAGCAGCTGGCGGTTGGTCCG  
AACCGCGTGACCGGCACCCGTCTGGAAAACGGCTCTTACCACGGCGTGGCGGCGGCGT  
TCGGTGCTGATGGTTACCACGTGGATAGCGTTGAATCCTTCTCTGCGGCGCTGGCTCAGG  
CTCTGGCACACAACCGTCCGGCTTGCATCAACGTTGCGGTTGCGCTGGACCCGATCCCG  
CCGGAAGAACTGATCCTGATCGGTATGGACCCGTTTCGCGGctcgagcaccaccaccaccactga

The protein sequence of *PfBAL* T481L

MAMITGGELVVRTLKAGVEHLFGLHGAHIDTIFQACLDHDVPIIDTRHEAAAGHAAEGYA  
RAGAKLGVALVTAGGGFTNAVTPIANAWLDRTPVLFLTGSGALRDETNLTQAGIDQVAM  
AAPITKWAHRVMATEHIPRLVMQAIRAALSAPRGPVLLDLPWDILMNQIDEDSVIIPDLVLS  
AHGARPD PADLDQALALLRKAERPVI VLGSEASRTARKTALS AFVAATGVPVFADYEGLSM  
LSGLPDAMRGGLVQONLYSFAKADAAPDLVLM LGARFGLNTGHGSGQLIPHS AQVIQVDPD  
ACELGRLQGIALGIVADVGGTIEALAQAQDAAWPDRGDWCAKVTDLAQERYASIAAKS  
SSEHALHPFHASQVIAKHVDAGVTVVADGALTYLWLSEVMSRVKPGGFLCHGYLGSMGV  
GFGTALGAQVADLEAGRRTILVTGDGSVGYSIGFDTLVRKQLPLIVIIMNNQSWGALLHFQ  
QLAVGPNRVTGTRLENGSYHGVAAAFGADGYHVDSVESFSAALAQALAHNRPACINVAVA  
LDPIPPEELILIGMDPFALEHHHHHH

The DNA sequence of *PfBAL* T481L-A480G

ATGGCAATGATCACCGGTGGTGAACCTGGTTGTTTCGTACCCTGATCAAAGCTGGTGTTGA  
ACACCTGTTCGGCCTGCACGGTGCGCATATTGATAACCATCTTCCAGGCGTGCCTGGATCA  
CGATGTGCCGATCATCGATACTCGCCATGAAGCTGCGGCGGGCCACGCGGCTGAAGGTT

ACGCTCGTGCGGGTGCTAAACTGGGTGTGGCGCTGGTGACGGCGGGCGGCGGTTTTAC  
CAACGCGGTGACCCCGATCGCGAACGCGTGGCTGGATCGTACCCCGGTTCTGTTTCCTGA  
CCGGTAGCGGTGCCCTGCGCGATGATGAAACCAACACCTTACAGGCGGGCATTGATCAG  
GTTGCGATGGCGGCGCCTATTACTAAATGGGCGCACCGCGTGATGGCTACCGAACACAT  
CCCGCGTCTGGTGATGCAGGCGATCCGCGCAGCTCTGAGCGCGCCGCGCGGGCCCGGTTTC  
TGCTGGATCTGCCGTGGGACATCCTGATGAACCAGATCGATGAAGATTCCGTGATCATTC  
CAGATCTGGTTCTGTCTGCGCACGGCGCGCGTCCAGATCCGGCGGACCTGGATCAGGCG  
CTGGCTCTGCTGCGCAAAGCGGAACGCCCGGTTATCGTGCTGGGTTCTGAAGCGTCCCG  
TACCGCCCGTAAAACCGCGCTGTCCGCGTTCGTGGCGGCTACCGGCGTGCCGGTTTTTCG  
CGGACTACGAAGGTCTGTCTATGCTGAGCGGCCTGCCGGATGCAATGCGTGCGGGTCTG  
GTTTCAGAACCTGTACAGCTTCGCTAAAGCAGACGCCGCCCGGATCTGGTGCTGATGCT  
GGGCGCACGTTTCGGCCTGAACACCGGTCACGGTTCGGGCCAGCTGATCCCGCACTCTG  
CGCAGGTGATCCAGGTTGATCCGGACGCATGTGAACTGGGCCGCTTACAGGGCATCGCT  
CTGGGCATCGTGCGGATGTTGGCGGCACCATCGAAGCACTGGCTCAGGCAACCGCTC  
AGGATGCGGCGTGCCGGATCGTGCGGATTGGTGCGCGAAAGTGACCGATCTGGCCCA  
GGAACGCTACGCGTCGATCGCGGCTAAAAGCAGCTCCGAACACGCGCTGCACCCGTTTC  
CACGCAAGCCAGGTTATTGCAAAACAGTTGATGCTGGTGTTACCGTGGTGCGGATGG  
TGCTCTGACCTACCTGTGGCTGTCTGAAGTGATGAGCCGTGTTAAACCGGGTGGCTTCC  
TGTGCCACGGCTACCTGGGCAGCATGGGCGTTGGTTTTGGCACCGCCCTGGGCGCGCAG  
GTTGCAGACCTGGAAGCTGGCCGTCGTACCATCCTCGTTACCGGCGACGGCTCCGTTGG  
CTACAGCATCGGCGAATTTGACACCCTGGTGCGTAAACAGCTGCCGCTGATCGTTATCAT  
CATGAACAACCAGAGCTGGGGTGGTCTGCACTTCCAGCAGCTGGCGGTTGGTCCG  
AACCGCGTGACCGGCACCCGTCTGGAAAACGGCTCTTACCACGGCGTGCGGGCGGCGT  
TCGGTGCTGATGGTTACCACGTGGATAGCGTTGAATCCTTCTCTGCGGCGCTGGCTCAGG  
CTCTGGCACACAACCGTCCGGCTTGATCAACGTTGCGGTTGCGCTGGACCCGATCCCG  
CCGGAAGAACTGATCCTGATCGGTATGGACCCGTTTCGCGGctcgagcaccaccaccaccactga

The protein sequence of *PfBAL* T481L-A480G

MAMITGGELVVRTLIKAGVEHLFGLHGAHIDTIFQACLDHDVPIIDTRHEAAAGHAAEGYA  
RAGAKLGVALVTAGGGFTNAVTPIANAWLDRTPVLFLTGSGALRDETNLTQAGIDQVAM  
AAPITKWAHRVMATEHIPRLVMQAIRAALSAPRGPVLLDLPWDILMNQIDEDSVIIPDLVLS  
AHGARPD PADLDQALALLRKAERPVIVLGSEASRTARKTALS AFVAATGVPVFADYEGLSM  
LSGLPDAMRGGLVQNLVSFAKADAAPDLVLM LGARFGLNTGHGSGQLIPHS AQVIQVDPD  
ACELGRLQGIALGIVADVGGTIEALA QATAQDAAWPDRGDWCAKVTDLAQERYASIAAKS  
SSEHALHPFHASQVIAKHVDAGVTVVADGALTYLWLSEVMSRVKPGGFLCHGYLGSMGV  
GFGTALGAQVADLEAGRRTILVTGDGSVGYSIGEFDTLVRKQLPLIVIIMNNQSWGGLLHFQ  
QLAVGPNRVTGTRLENGSYHGVAAAFGADGYHVDSVESFSAALAQALAHNRPACINVAVA  
LDPIPEELILIGMDPFALEHHHHHH

The DNA sequence of *PfBAL* T481L-A480G-Y397A

ATGGCAATGATCACCGGTGGTGAACCTGGTTGTTTCGTACCCTGATCAAAGCTGGTGTTGA  
ACACCTGTTTCGGCCTGCACGGTGCGCATATTGATACCATCTTCCAGGCGTGCTGGATCA  
CGATGTGCCGATCATCGATACTCGCCATGAAGCTGCGGCGGGCCACGCGGCTGAAGGTT  
ACGCTCGTGCGGGTGCTAAACTGGGTGTGGCGCTGGTGACGGCGGGCGGCGGTTTTAC  
CAACGCGGTGACCCCGATCGCGAACGCGTGGCTGGATCGTACCCCGGTTCTGTTTCCTGA

CCGGTAGCGGTGCCCTGCGCGATGATGAAACCAACACCTTACAGGCGGGCATTGATCAG  
GTTGCGATGGCGGCGCCTATTACTAAATGGGCGCACCGCGTGATGGCTACCGAACACAT  
CCCGCGTCTGGTGATGCAGGCGATCCGCGCAGCTCTGAGCGCGCCGCGCGGGCCCGGTTTC  
TGCTGGATCTGCCGTGGGACATCCTGATGAACCAGATCGATGAAGATTCCGTGATCATTC  
CAGATCTGGTTCTGTCTGCGCACGGCGCGCGTCCAGATCCGGCGGACCTGGATCAGGCG  
CTGGCTCTGCTGCGCAAAGCGGAACGCCCCGGTTATCGTGCTGGGTCTGAAGCGTCCCCG  
TACCGCCCCGTAAAACCGCGCTGTCCGCGTTCGTGGCGGCTACCGGCGTGCCGGTTTTTCG  
CGGACTACGAAGGTCTGTCTATGCTGAGCGGCCTGCCGGATGCAATGCGTGCGGGTCTG  
GTTCAGAACCTGTACAGCTTCGCTAAAGCAGACGCCGCCCGGATCTGGTGCTGATGCT  
GGGCGCACGTTTCGGCCTGAACACCGGTCACGGTTCGGGCCAGCTGATCCCGCACTCTG  
CGCAGGTGATCCAGGTTGATCCGGACGCATGTGAACTGGGCCGCTTACAGGGCATCGCT  
CTGGGCATCGTGCGGATGTTGGCGGCACCATCGAAGCACTGGCTCAGGCAACCGCTC  
AGGATGCGGCGTGCCCGGATCGTGCGGATTGGTGCGCGAAAGTGACCGATCTGGCCCA  
GGAACGCTACGCGTCGATCGCGGCTAAAAGCAGCTCCGAACACGCGCTGCACCCGTTTC  
CACGCAAGCCAGGTTATTGCAAAACACGTTGATGCTGGTGTTACCGTGGTGCGGATGG  
TGCTCTGACC**GCA**CTGTGGCTGTCTGAAGTGATGAGCCGTGTTAAACCGGGTGGCTTCC  
TGTGCCACGGCTACCTGGGCAGCATGGGCGTTGGTTTTGGCACCGCCCTGGGCGCGCAG  
GTTGCAGACCTGGAAGCTGGCCGTCGTACCATCCTCGTTACCGGCGACGGCTCCGTTGG  
CTACAGCATCGGCGAATTTGACACCCTGGTGCGTAAACAGCTGCCGCTGATCGTTATCAT  
CATGAACAACCAGAGCTGGGGT**GGTCTG**CTGCACTTCCAGCAGCTGGCGGTTGGTCCG  
AACCGCGTGACCGGCACCCGTCTGGAAAACGGCTCTTACCACGGCGTGCGGCGGCGGT  
TCGGTGCTGATGGTTACCACGTGGATAGCGTTGAATCCTTCTCTGCGGCGCTGGCTCAGG  
CTCTGGCACACAACCGTCCGGCTTGCAATCAACGTTGCGGTTGCGCTGGACCCGATCCCG  
CCGGAAGAACTGATCCTGATCGGTATGGACCCGTTTCGC**Gctc**gagcaccaccaccaccactga

The protein sequence of *PfBAL* T481L-A480G-Y397A

MAMITGGELVVRTLKAGVEHLFGLHGAHIDTIFQACLDHDVPIIDTRHEAAAGHAAEGYA  
RAGAKLGVALVTAGGGFTNAVTPIANAWLDRTPVLFLTGSGALRDDETNTLQAGIDQVAM  
AAPITKWAHRVMATEHIPRLVMQAIRAALSAPRGPVLLDLPWDILMNQIDEDSVIIPDLVLS  
AHGARPD PADLDQALALLRKAERP VIVLGSEASRTARKTALS AFVAATGVPVFADYEGLSM  
LSGLPDAMRGLVQNLVSFAKADAAPDLVLM LGARFGLNTGHGSGQLIPHS AQVIQVDPD  
ACELGRLQGIALGIVADVGGTIEALAQAQDAAWPDRGDWCAKVTDLAQERYASIAAKS  
SSEHALHPFHASQVIAKHVDAGVTVVADGALT**AL**WLSEVMSRVKPGGFLCHGYLGSMGV  
GFGTALGAQVADLEAGRRTILVTGDGSVGYSIGFDTLVRKQLPLIVIIMNNQSWG**LL**LHFQ  
QLAVGPNRVTGTRLENGSYHGVAAAFGADGYHVDSVESFSAALA QALAHNRPACIN VAVA  
LDPIPEELILIGMDPFALEHHHHHH

The DNA sequence of *PfBAL* T481L-A480G-Y397A-W163C

ATGGCAATGATCACCGGTGGTGAACCTGGTTGTTCTGATACCCTGATCAAAGCTGGTGTTGA  
ACACCTGTTTCGGCCTGCACGGTGCGCATATTGATACCATCTTCCAGGCGTGCTGGATCA  
CGATGTGCCGATCATCGATACTCGCCATGAAGCTGCGGCGGGCCACGCGGCTGAAGGTT  
ACGCTCGTGCGGGTGCTAAACTGGGTGTGGCGCTGGTGACGGCGGGCGGCGGTTTTAC  
CAACGCGGTGACCCCGATCGCGAACGCGTGGCTGGATCGTACCCCGGTTCTGTTCTGA  
CCGGTAGCGGTGCCCTGCGCGATGATGAAACCAACACCTTACAGGCGGGCATTGATCAG  
GTTGCGATGGCGGCGCCTATTACTAAATGGGCGCACCGCGTGATGGCTACCGAACACAT

CCCGCGTCTGGTGATGCAGGCGATCCGCGCAGCTCTGAGCGCGCCGCGCGGGCCCGGTTCTGCTGGATCTGCCG**TGC**GACATCCTGATGAACCAGATCGATGAAGATTCCGTGATCATTCAGATCTGGTTCTGTCTGCGCACGGCGCGCGTCCAGATCCGGCGGACCTGGATCAGGCGCTGGCTCTGCTGCGCAAAGCGGAACGCCCGGTTATCGTGCTGGGTTCTGAAGCGTCCCCGTACCGCCCGTAAAACCGCGCTGTCCGCGTTCGTGGCGGCTACCGGCGTGCCGGTTTTTCGCGGACTACGAAGGTCTGTCTATGCTGAGCGGCCTGCCGGATGCAATGCGTGGCGGTCTGGTTCAGAACCTGTACAGCTTCGCTAAAGCAGACGCCGCCCGGATCTGGTGCTGATGCTGGGCGCACGTTTCGGCCTGAACACCGGTCACGGTTCGGGCCAGCTGATCCCGCACTCTGCGCAGGTGATCCAGGTTGATCCGGACGCATGTGAACTGGGCCGCTTACAGGGCATCGCTCTGGGCATCGTGGCGGATGTTGGCGGCACCATCGAAGCACTGGCTCAGGCAACCGCTCAGGATGCGGCGTGCCCGGATCGTGGCGATTGGTGCGCGAAAGTGACCGATCTGGCCCAAGAACGCTACGCGTCGATCGCGGCTAAAAGCAGCTCCGAACACGCGCTGCACCCGTTCCACGCAAGCCAGGTTATTGCAAAACACGTTGATGCTGGTGTTACCGTGGTGGCGGATGGTGCTCTGACC**GCA**CTGTGGCTGTCTGAAGTGATGAGCCGTGTTAAACCGGGTGGCTTCCGTGTCACGGCTACCTGGGCAGCATGGGCGTTGGTTTTGGCACCGCCCTGGGCGCGCAGGTTGCAGACCTGGAAGCTGGCCGTCGTACCATCCTCGTTACCGGCGACGGCTCCGTTGGCTACAGCATCGGCGAATTTGACACCCTGGTGCGTAAACAGCTGCCGCTGATCGTTATCATCATGAACAACCAGAGCTGGGGT**GGTCTG**CTGCACTGGCAGCAGCTGGCGGTTGGTCCGAACCGCGTGACCGGCACCCGTCTGGAAAACGGCTCTTACCACGGCGTGGCGGCGGCGTTCGGTGCTGATGGTTACCACGTGGATAGCGTTGAATCCTTCTCTGCGGCGCTGGCTCAGGCTCTGGCACACAACCGTCCGGCTTGCATCAACGTTGCGGTTGCGCTGGACCCGATCCCGCCGGAAGAACTGATCCTGATCGGTATGGACCCGTTTCGC

Gctcgagcaccaccaccaccaccactga

The protein sequence of *PfBAL* T481L-A480G-Y397A-W163C

MAMITGGELVVRTLKAGVEHLFGLHGAHIDTIFQACLDHDPVIDTRHEAAAGHAAEGYARAGAKLGVALVTAGGGFTNAVTPIANAWLDRTPVLFLTGSGALRDDETNTLQAGIDQVAMAAPITKWAHRVMATEHIPRLVMQAIRAALSAPRGPVLLDLP**CD**ILMNQIDEDSVIIPDLVLSAHGARPD PADLDQALALLRKAERPVIVLGSEASRTARKTALS AFVAATGVPVFADYEGLSMLSGLPDAMRGGLVQNLVSFAKADAAPDLVLM LGARFGLNTGHGSGQLIPHS AQVIQVDPDACELGRLQGIALGIVADVGGTIEALAQATAQDAAWPDRGDWCAKVTDLAQERYASIAAKSSSEHALHPFHASQVIAKHVDAGVTVVADGALT**AL**WLSEVMSRVKPGGFLCHGYLGSMGVGFGTALGAQVADLEAGRRTILVTGDGSVGYSIGEFDTLVRKQLPLIVIIMNNQSWG**GLL**HWQQLAVGPNRVTGTRLENGSYHGVA AAFGADGYHVDSVESFSAALAQALAHNR PACINVAVALDPIPEELILIGMDPFALEHHHHHH

### 3. Directed Evolution

#### 3.1 Materials and General Methods for Directed Evolution

Molecular biology reagents and chemicals were purchased from Vazyme Biotech Co., Ltd, Beyotime Biotech, Inc., if not specifically noted. Primers were ordered from Beijing Tsingke Biotech Co., Ltd. and listed in Supplementary Table 24.

#### 3.2 The Evolution Trajectory

The variants library based on wild-type *PfBAL* built by our prior work<sup>1</sup> was screened for enantioselective C(*sp*<sup>3</sup>)-H bond radical acylation reaction at first, and variants *PfBAL*\_T481L, *PfBAL*\_T481L-A480G were identified to be the best catalyst (Supplementary Table 1). Then, the crystal structure of *PfBAL*\_T481L-A480G was simulated by Molecular Dynamics Simulation (MD) and used as the acceptor, Breslow intermediate radical cation formed by ThDP and **1a** complex and the benzylic radical was used as the ligand for docking. Accordingly, sixteen amino acid residues within 5 Å of the ketyl radical were selected for glycine scanning (Supplementary Fig. 7). According to the results of glycine scanning (Supplementary Table 4), seven amino acid residues were selected for further mutagenesis. Four residues (H26, Q113, Y239, C414) were substituted with amino acids of different sizes: alanine (A), leucine (L), phenylalanine (F), Isoleucine (I), Valine (V); the other three residues (W163, N283, Y397) were performed by site-saturation mutagenesis using the "Tang and 22c-trick" method<sup>2</sup>. According to the protocol, four primers containing codons NDT, VMA, ATG and TGG, respectively, (NDT encodes I, N, S, G, D, V, R, H, L, F, Y, and C, VMA encodes E, A, Q, P, K, and L, ATG encodes M, and TGG encodes W, thereby including all 20 natural amino acids) were used for a given site of mutagenesis. These four primers were mixed in a ratio of 12:6:1:1. Analysis of the results of the reactions (Supplementary Tables 4-8), *PfBAL*\_T481L-A480G-Y397A (41% yield, 93% ee) and *PfBAL*\_T481L-A480G-Y397G (43% yield, 89% ee) were identified to be the best catalysts, and some mutagenesis of 26 and 163 sites were also proved to have improvement on yield and enantioselectivity. Then we conducted iterative site-saturation mutagenesis at positions H26, and W163 using *PfBAL*\_T481L-A480G-Y397G/A as template, respectively. Finally, analysis of the reaction outcomes of the variants (Supplementary Tables 9-11), mutant **RAT<sub>CH</sub>** (*PfBAL*\_T481L-A480G-Y397A-W163C) was identified as the best catalyst for the model reaction.

### 3.3 Mutant Creation

The primers were designed by using a two-step PCR method in which one primer containing mutagenic sites and one silent primer were used to generate a short DNA fragment, which was recovered and then employed as a megaprimer to amplify the whole plasmid<sup>3</sup>. The PCR product of the second step was digested by *DpnI* restriction enzyme, and 5 µL of the resulting mixture was transformed into chemically-competent *E. coli* BL21 (DE3) cells. The single colonies from the transformation plates were picked and cultured overnight at 37 °C with kanamycin (50 µg/mL). Then the overnight cultures were pelleted and mini-prepped by Sangon Plasmid Miniprep Kit and further sequenced to confirm the mutations (Supplementary Table 24).



## 4. Typical Procedure for Photobiocatalytic Reactions

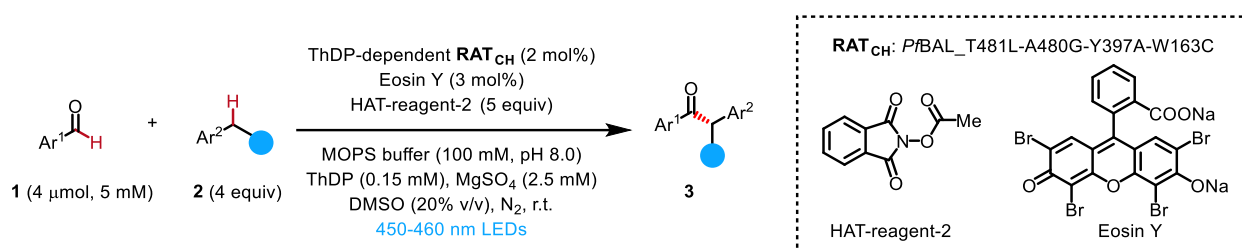

All enzymatic reactions were assembled in a Vigor glove box with an O<sub>2</sub> concentration below 3 ppm. Taking **1a** + **2a** → **3a** as an example, in the glove box, to a 4 mL vial containing a magnetic stir bar, solutions of PfBAL\_T481L-A480G-Y397A-W163C (**RAT<sub>CH</sub>**), 4-chlorobenzaldehyde **1a** (40 μL of a 100 mM DMSO stock, 0.004 mmol), ethylbenzene **2a** (40 μL of a 400 mM DMSO stock, 0.016 mmol), HAT reagent 2 (80 μL of a 250 mM DMSO stock, 0.020 mmol) and Eosin Y (20 μL of a 6 mM stock in MOPS buffer, 3 mol%) were added to ~ 620 μL of MOPS buffer (100 mM, containing 2.5 mM MgSO<sub>4</sub>, 0.15 mM ThDP, pH 8.0). The total volume of the reaction mixture was 0.8 mL and the final concentration for DMSO was 20 v/v %. The vial was sealed with a screw cap and then sealed tightly with a sealing film, removed from the glove box, illuminated with 450-460 nm LEDs, and stirred for 14 h at room temperature with a cooling fan.

For reaction work-up, ethyl acetate (1.0 mL) and 20.0 μL of an internal standard stock (2 v/v % of *n*-dodecane in ethyl acetate) were added and mixed thoroughly. The organic phase was separated and then analysed by GC, GC-MS and chiral HPLC. The product formation was confirmed by comparing MS spectra and the retention times in GC and HPLC with the racemic standards. GC yields were determined relative to the *n*-dodecane according to calibration curves. Enantioselectivity was determined by chiral HPLC. LC yields were determined using a ZORBAX SB-C18 column (2.1 x 50 mm, 1.8 μm) against an internal standard 1-benzyl-4-chlorobenzene at 210 nm.

All the 0.004 mmol reactions were repeated at least twice independently using different batches of the enzyme. Selected examples were reproduced by another person from the same group. GC yields were typically within 10% error among each run. Ee values were typically within 3% error among each run.

Substrates (**3g**, **3k**, **3q** and **3af**) were selected to be performed on a 0.1-mmol scale. Accordingly, 200 mL Schlenk flask was used. After irradiation for 14 h, the mixture was transferred into 50 mL centrifuge tubes and centrifuged at 6000 rpm for 15 min, the supernatant was extracted with ethyl acetate five times, and the precipitate was washed with ethyl acetate five times. Then, the combined organic phase was concentrated and purified by flash chromatography on silica gel (petroleum ether/ethyl acetate = 100:1) to afford isolated yield.

Unless otherwise noted, *Conditions C* were applied: aldehyde **1** (0.004 mmol), ethylbenzene **2** (0.016 mmol), HAT reagent 2 (0.020 mmol), **RAT<sub>CH</sub>** (2 mol%), Eosin Y (3 mol%), 20 v/v % DMSO in 100 mM MOPS buffer (pH 8.0, containing 2.5 mM MgSO<sub>4</sub> and 0.15 mM ThDP) were stirred for 14 h at room temperature under N<sub>2</sub> atmosphere with the irradiation of 450-460 nm LEDs; total volume of the reaction is 0.8 mL; the yield was determined by GC and based on **1**; enantiomeric excess (ee) was determined by HPLC analysis on a chiral stationary phase.

## 5. Preparation of Racemic References

### Method A:

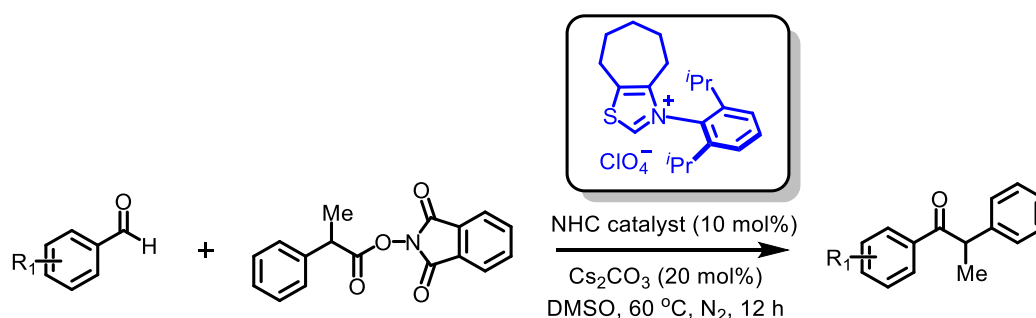

Arylaldehyde (1 mmol), *N*-(acyloxy)phthalimide (2 mmol), NHC catalyst (10 mol%) and Cs<sub>2</sub>CO<sub>3</sub> (20 mol%) were added to a dry Schlenk tube equipped with a stirring bar. The mixture was evacuated and backfilled with N<sub>2</sub> for three times. Then, anhydrous DMSO (4 mL) was added by syringe under N<sub>2</sub> atmosphere. The reaction mixture was stirred at 60 °C for 12 h. The reaction was quenched by adding 10 mL water and extracted with ethyl acetate for three times. The organic layers were combined and dried with anhydrous Na<sub>2</sub>SO<sub>4</sub>. After concentration under reduced pressure, the crude residue was purified by flash chromatography on silica gel (petroleum ether/ethyl acetate = 100:1 to 20:1) to afford the racemic references. **Method A** was used for synthesizing racemic references **3q** and **3r**.

### Method B:

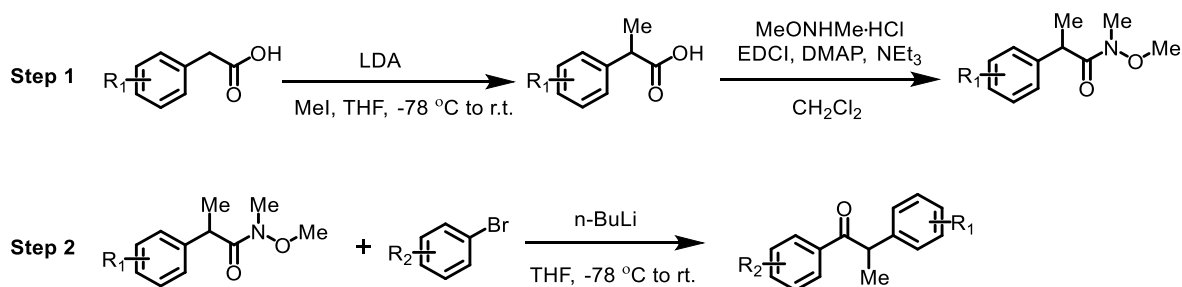

**Step 1:** To a solution of LDA (6 mmol, 2 eq) in anhydrous THF (15 mL) was added phenylacetic acid (3 mmol, 1 eq, in 5 mL THF) at -78 °C. The mixture was stirred at -78 °C for 1 h. Iodomethane (4.5 mmol, 1.5 eq) was added in one portion and then the mixture was allowed to warm to room temperature and stirred overnight. The reaction mixture was acidified with HCl (1.0 N), and extracted with ethyl acetate three times. The organic layers were combined and dried over anhydrous Na<sub>2</sub>SO<sub>4</sub>, then concentrated under reduced pressure. The crude product was used directly for the next step without further purification. The crude mixture of the 2-phenylpropionic acid (1.0 eq), *N*, *O*-dimethylhydroxylamine hydrochloride (1.3 eq) and DMAP (10 mol%) were added into a flask with CH<sub>2</sub>Cl<sub>2</sub> (0.2 M) at 0 °C, NEt<sub>3</sub> (1.33 eq) and EDCI (1.3 eq) were added successively. The reaction mixture was stirred at 0 °C for 1 h, then allowed to warm to room temperature and stirred overnight. The organic layer was washed with 1.0 N HCl (3×10 mL), aqueous saturated NaHCO<sub>3</sub> (3×10 mL),

and brine (20 mL). The combined organic layers were dried over anhydrous Na<sub>2</sub>SO<sub>4</sub>, and concentrated under reduced pressure. The crude mixture was purified by flash chromatography on silica gel (petroleum ether/ethyl acetate = 30:1 to 10:1) to give the pure Weinreb amide.

**Step 2:** The aryl bromide (1.5 eq) was dissolved in THF, *n*BuLi (1.5 eq) was added dropwise at -78 °C under a N<sub>2</sub> atmosphere. The reaction was stirred at -78 °C for 1 h. The corresponding Weinreb amide (1.0 eq in THF) was added dropwise to the flask. The reaction was allowed to warm to room temperature and stirred overnight. The reaction was quenched with a saturated aqueous NH<sub>4</sub>Cl solution at room temperature and extracted with ethyl acetate. After drying with anhydrous Na<sub>2</sub>SO<sub>4</sub>, filtration and concentration under reduced pressure, the crude residue was purified by flash chromatography on silica gel (petroleum ether/ethyl acetate = 100:1 to 5:1) to afford the racemic references. **Method B** was used for synthesizing the rest of the racemic references.

## 6. Mechanistic Studies

### 6.1 TEMPO Trapping Experiment

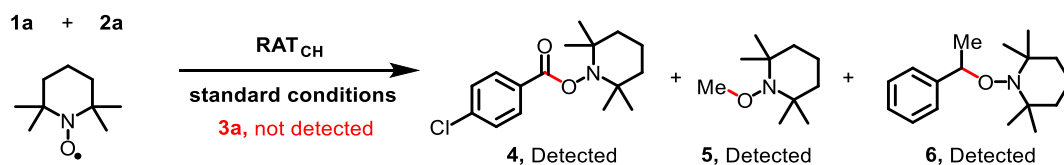

To probe the radical intermediate in our enantioselective  $\text{C}(\text{sp}^3)\text{--H}$  bond radical acylation reaction, a TEMPO trapping experiment was designed and performed. Radical trapping reagent TEMPO (5.0 eq) was added to the model reaction under *Conditions C* by using  $\text{RAT}_{\text{CH}}$  as a catalyst. The reaction mixture was analysed by GC and HRMS. We found that the formation of product **3a** was completely inhibited and products **4**, **5** and **6** were detected by HRMS which indicated the formation of the ketyl radical (**Int. C** in Fig. 2a), methyl radical (**Int. D** in Fig. 2a) and benzyl radical (**Int. E** in Fig. 2a).

PXC-398-1 #124 RT: 0.66 AV: 1 NL: 7.64E5  
T: FTMS + p ESI Full ms [50.0000-750.0000]

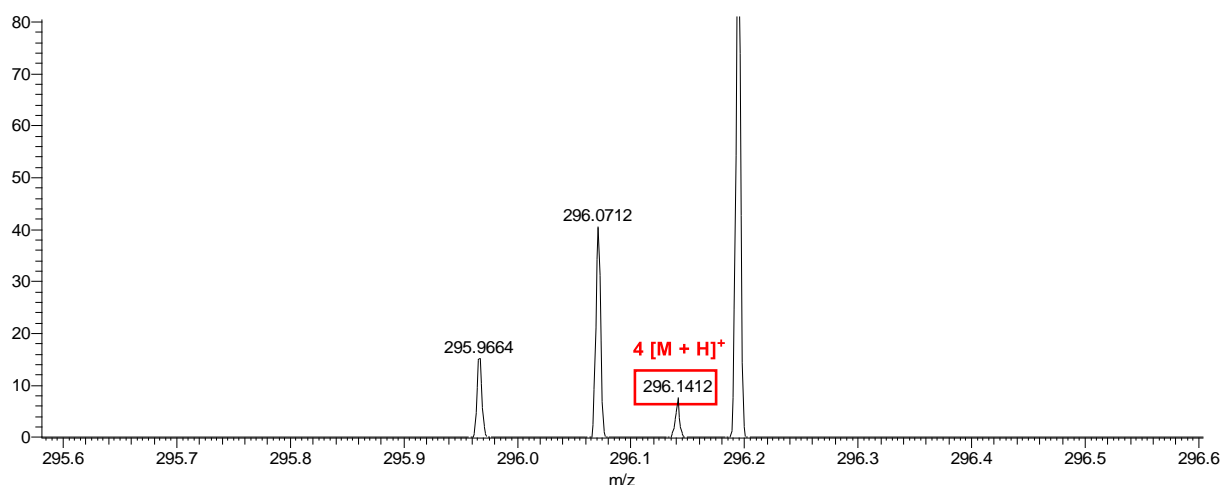

PXC-398-1 #346 RT: 1.86 AV: 1 NL: 5.16E6  
T: FTMS + p ESI Full ms [50.0000-750.0000]

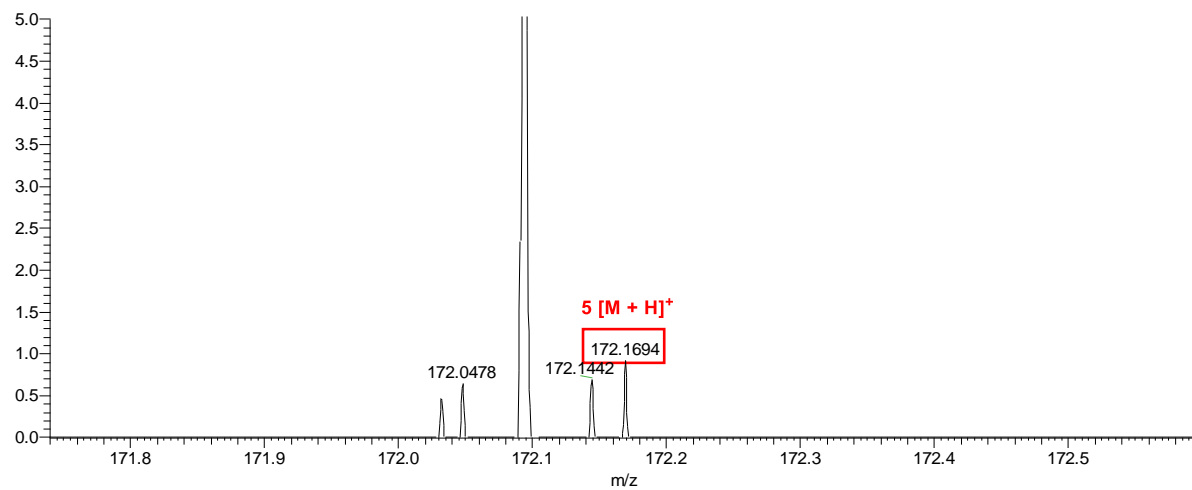

PXC-398-1 #76 RT: 0.40 AV: 1 NL: 4.31E5  
T: FTMS + p ESI Full ms [50.0000-750.0000]

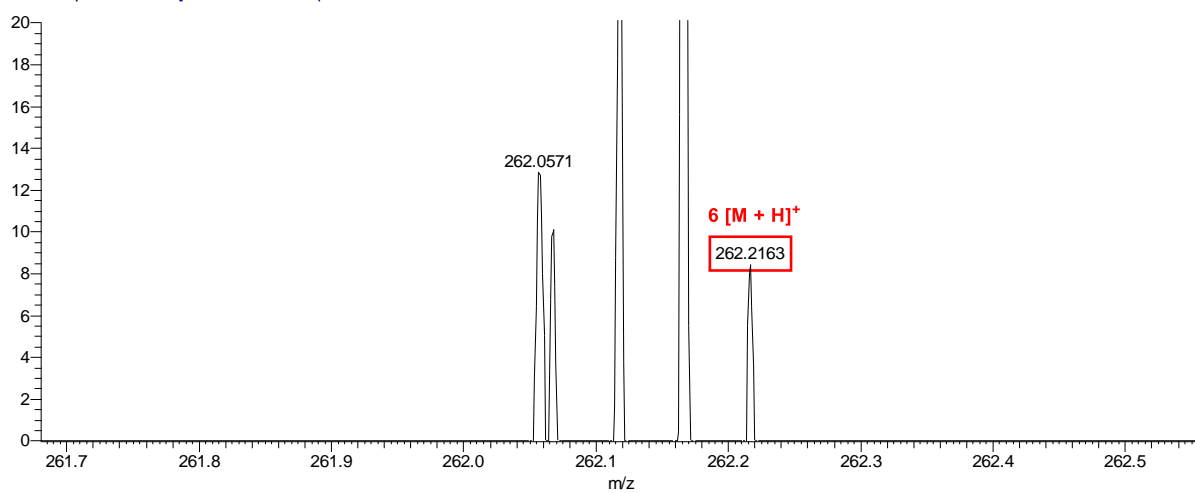

## 6.2 Ethene-1,1-diylidibenzene Trapping Experiment

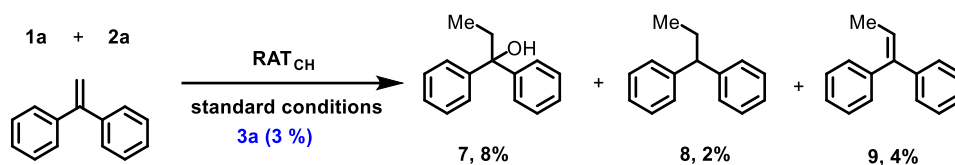

To probe the methyl radical intermediate in our enantioselective  $\text{C}(\text{sp}^3)\text{-H}$  bond radical acylation reaction, an ethene-1,1-diylidibenzene trapping experiment was designed and performed. Radical trapping reagent ethene-1,1-diylidibenzene (5.0 eq) was added to the model reaction under the standard conditions by using  $\text{RAT}_{\text{CH}}$  as a catalyst. The reaction result was analysed by GC, which showed that product **3a** formed in 3% yield. According to the comparisons with standard references, formations of **7**, **8** and **9** were confirmed. Based on the GC calibration curves, the yields referring to ethene-1,1-diylidibenzene are 8%, 2%, 4%, respectively, for compounds **7-9**. These results indicated the formation of methyl radical intermediate.

GC calibration curve for **7** is displayed below.

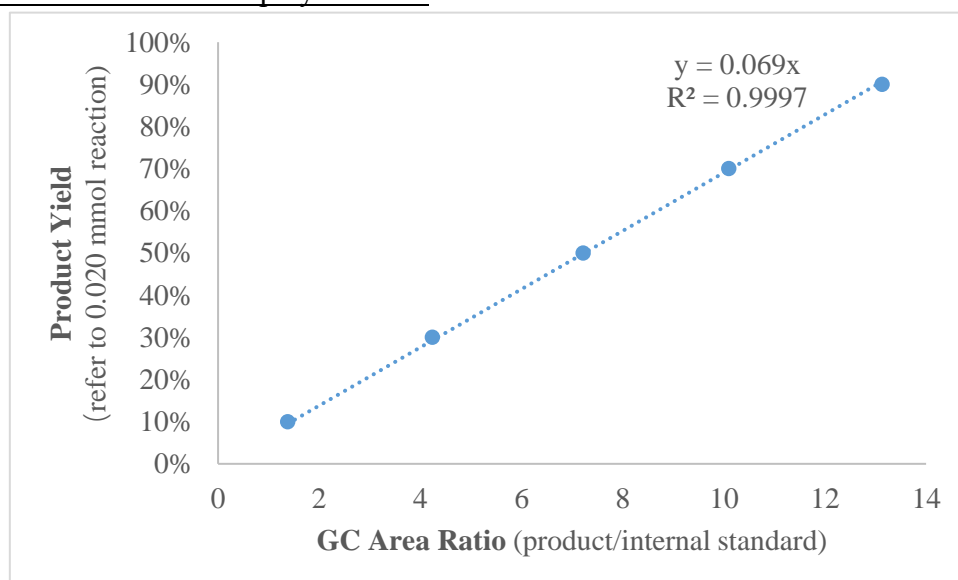

### 1,1-Diphenylpropan-1-ol (**7**)

**7** is a white solid (144 mg, 68% yield) and the NMR spectra of **7** match the one previously reported in the literature<sup>4</sup>.

$^1\text{H}$  NMR (400 MHz,  $\text{CDCl}_3$ )  $\delta$  7.44-7.37 (m, 4H), 7.35-7.26 (m, 4H), 7.25-7.17 (m, 2H), 2.32 (q,  $J$  = 7.3 Hz, 2H), 2.06 (s, 1H), 0.88 (t,  $J$  = 7.3 Hz, 3H).

$^{13}\text{C}$  NMR (100 MHz,  $\text{CDCl}_3$ )  $\delta$  146.9, 128.1, 126.7, 126.1, 78.4, 34.4, 8.1.

HRMS (ESI,  $m/z$ ) calcd. for  $\text{C}_{15}\text{H}_{17}\text{O}$   $[\text{M}+\text{H}-\text{H}_2\text{O}]^+$  195.1168, found: 195.1168.

GC calibration curve for **8** is displayed below.

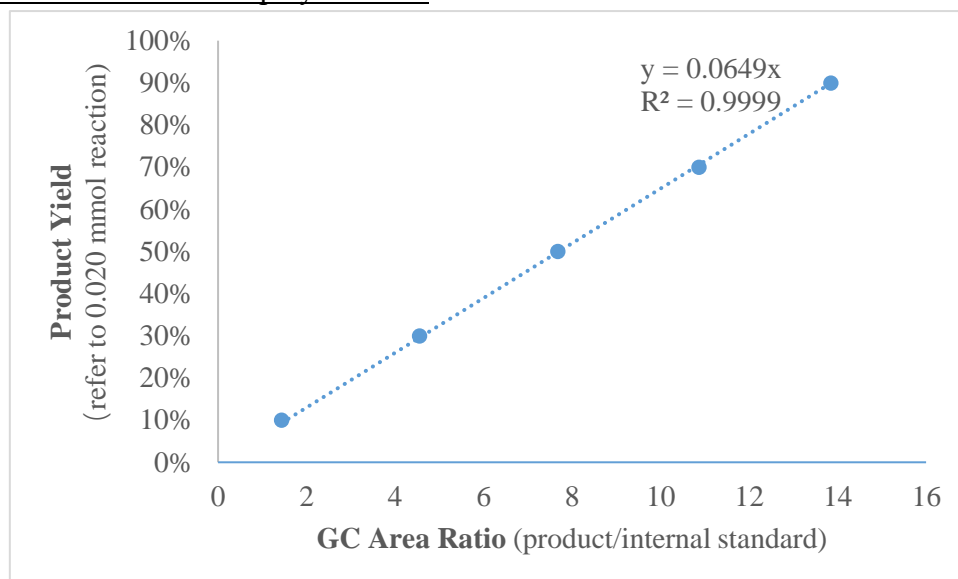

#### Propane-1,1-diylidibenzene (**8**)

**8** is a colorless liquid (178 mg, 91% yield) and the NMR spectra of **8** match the one previously reported in the literature<sup>5</sup>.

<sup>1</sup>H NMR (400 MHz, CDCl<sub>3</sub>)  $\delta$  7.31-7.20 (m, 8H), 7.21-7.12 (m, 2H), 3.79 (t,  $J = 7.8$  Hz, 1H), 2.07 (p,  $J = 7.4$  Hz, 3H), 0.90 (t,  $J = 7.3$  Hz, 3H).

<sup>13</sup>C NMR (100 MHz, CDCl<sub>3</sub>)  $\delta$  145.1, 128.3, 127.9, 126.0, 53.2, 28.6, 12.8.

MS (EI,  $m/z$ ) calcd. for C<sub>15</sub>H<sub>16</sub> [M]<sup>+</sup> 196.1, found: 196.1.

GC calibration curve for **9** is displayed below.

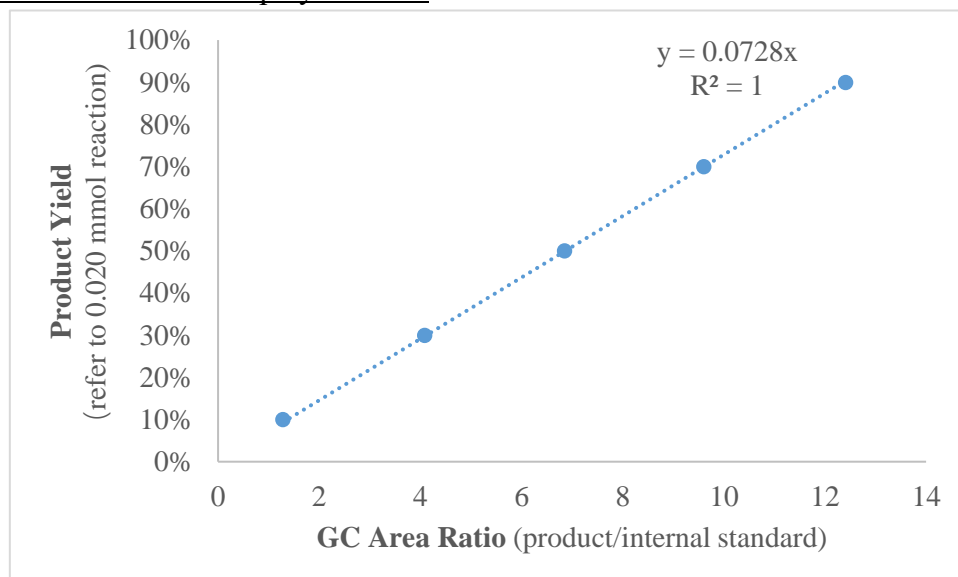

#### Prop-1-ene-1,1-diylidibenzene (**9**)

**9** is a colorless liquid (413 mg, 85% yield) and the NMR spectra of **9** match the one previously reported in the literature<sup>6</sup>.

**<sup>1</sup>H NMR (400 MHz, CDCl<sub>3</sub>)**  $\delta$  7.40-7.32 (m, 2H), 7.33-7.26 (m, 1H), 7.29-7.15 (m, 7H), 6.17 (q,  $J$  = 7.0 Hz, 1H), 1.75 (d,  $J$  = 7.0 Hz, 3H).

**<sup>13</sup>C NMR (100 MHz, CDCl<sub>3</sub>)**  $\delta$  142.9, 142.4, 140.0, 130.0, 128.1, 128.0, 127.2, 126.8, 126.7, 124.1, 15.7.

**MS** (EI,  $m/z$ ) calcd. for C<sub>15</sub>H<sub>14</sub> [M]<sup>+</sup> 194.1, found: 194.1.



## 6.3 BHT Trapping Experiment

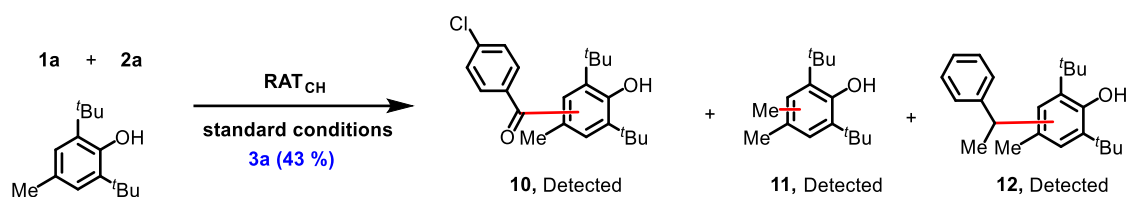

To probe the radical intermediate in our enantioselective  $\text{C}(sp^3)\text{--H}$  bond radical acylation reaction, a BHT (butylated hydroxytoluene) trapping experiment was designed and performed. Radical trapping reagent BHT (5.0 eq) was added to the model reaction under *Conditions C* by using  $\text{RAT}_{\text{CH}}$  as a catalyst. The reaction result was analysed by GC, HRMS. We found that product **3a** formed in 43% yield. Products **10**, **11** and **12** were detected by HRMS which indicated the formation of the ketyl radical (**Int. C** in Fig. 2a), methyl radical (**Int. D** in Fig. 2a) and benzyl radical (**Int. E** in Fig. 2a).

PXC-399-1 #292 RT: 1.55 AV: 1 NL: 9.48E5  
T: FTMS + p ESI Full ms [50.0000-750.000<sup>m/z</sup>]

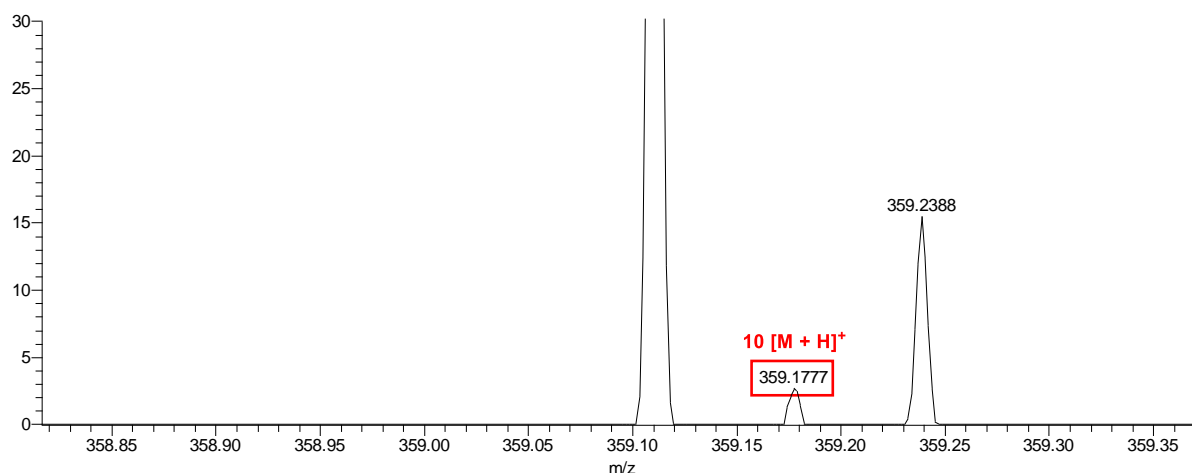

PXC-399-1 #34 RT: 0.18 AV: 1 NL: 6.90E5  
T: FTMS + p ESI Full ms [50.0000-750.000<sup>+</sup>]

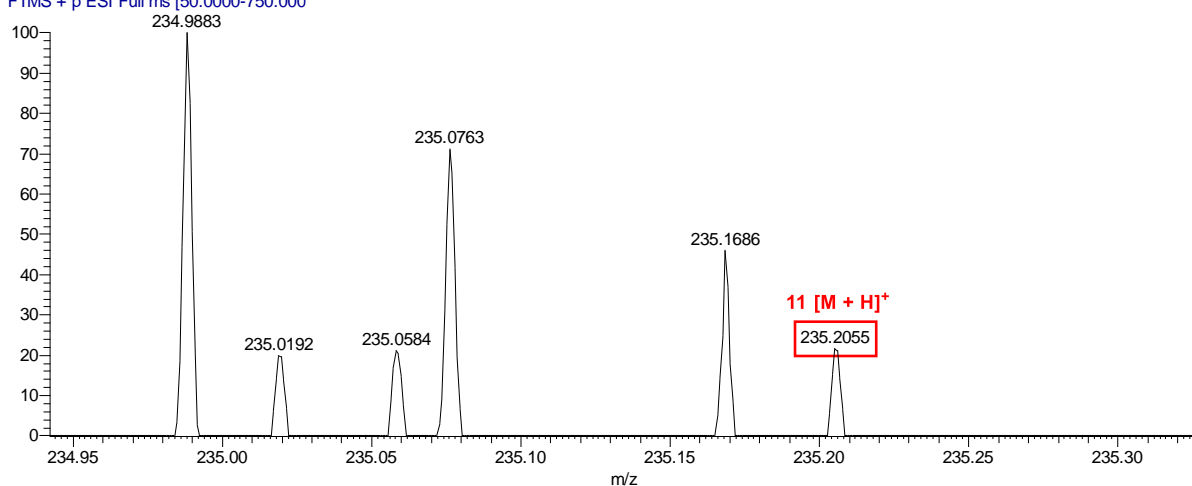

PXC-399-1 #155 RT: 0.82 AV: 1 NL: 3.53E4  
T: FTMS + p ESI Full ms [50.0000-750.000<sup>+</sup>]

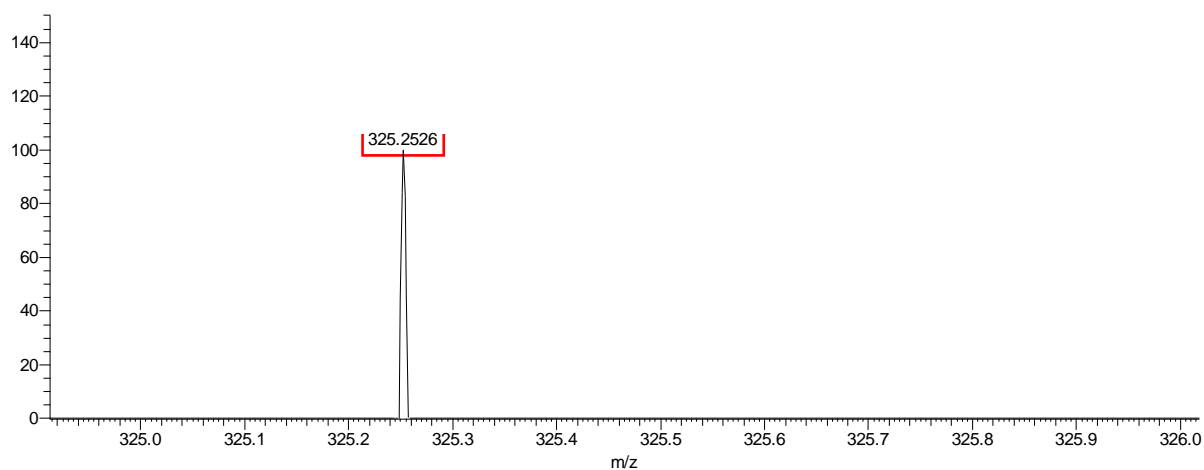

## 6.4 Kinetic Isotope Effect Experiments

4-(Propan-2-yl-2-d)-1,1'-biphenyl (**2l-d<sub>2</sub>**) was prepared as a white solid (164 mg, 89%) following previously reported procedure<sup>7</sup>. Almost 100% deuteration ratio was achieved according to the <sup>1</sup>H NMR spectrum.

<sup>1</sup>H NMR (400 MHz, CDCl<sub>3</sub>) δ 7.61-7.55 (m, 2H), 7.55-7.49 (m, 2H), 7.46-7.38 (m, 2H), 7.36-7.24 (m, 3H), 1.26 (s, 3H).

<sup>13</sup>C NMR (100 MHz, CDCl<sub>3</sub>) δ 143.3, 141.2, 138.6, 128.7, 128.3, 127.1, 127.0, 126.9, 27.8 (t, *J* = 19.6 Hz), 15.4.

MS (EI, *m/z*) calcd. for C<sub>14</sub>H<sub>12</sub>D<sub>2</sub> [M]<sup>+</sup> 184.1, found: 184.2.

### Parallel reactions:

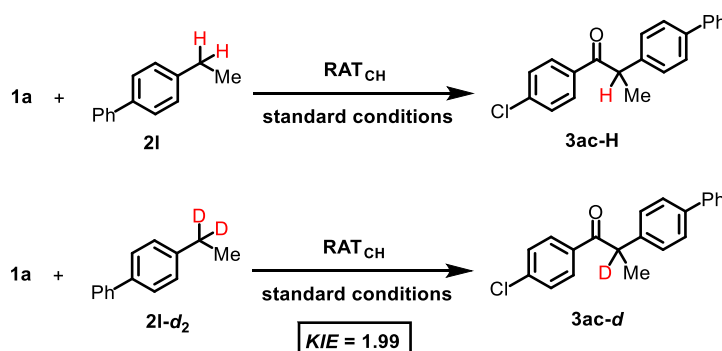

Five vials in parallel, were added 4-chlorobenzaldehyde **1a** (0.004 mmol), 4-ethyl-1,1'-biphenyl (0.016 mmol), HAT reagent **2** (0.020 mmol), RAT<sub>CH</sub> (2 mol%), Eosin Y (3 mol%), 20 v/v % DMSO in 100 mM MOPS buffer (pH 8.0, containing 2.5 mM MgSO<sub>4</sub> and 0.15 mM ThDP); total volume of the reaction mixture was 0.8 mL each. The vials were stirred for 10 min, 20 min, 30 min, 40 min, 50 min, respectively, at room temperature under N<sub>2</sub> atmosphere with the irradiation of 450-460 nm LEDs. Then the mixtures were analysed by GC for the determination of yields at different time. These results were repeated twice, to get average yields for yield-time curves.

Following the same steps but using 4-(propan-2-yl-2-d)-1,1'-biphenyl instead, an initial rate for deuterated substrate was therefore determined.

| Time (min) | <b>3ac-H</b> (GC yield)<br>(average of duplicate runs) | <b>3ac-d</b> (GC yield)<br>(average of duplicate runs) |
|------------|--------------------------------------------------------|--------------------------------------------------------|
| 10         | 6.42                                                   | 3.11                                                   |
| 20         | 10.64                                                  | 6.39                                                   |
| 30         | 16.44                                                  | 8.65                                                   |
| 40         | 20.27                                                  | 9.23                                                   |
| 50         | 22.65                                                  | 11.54                                                  |

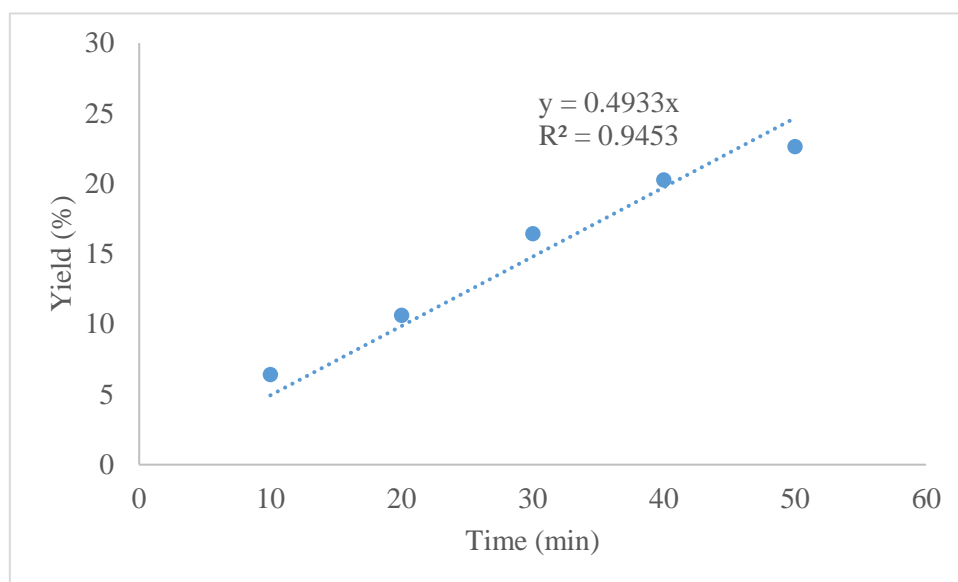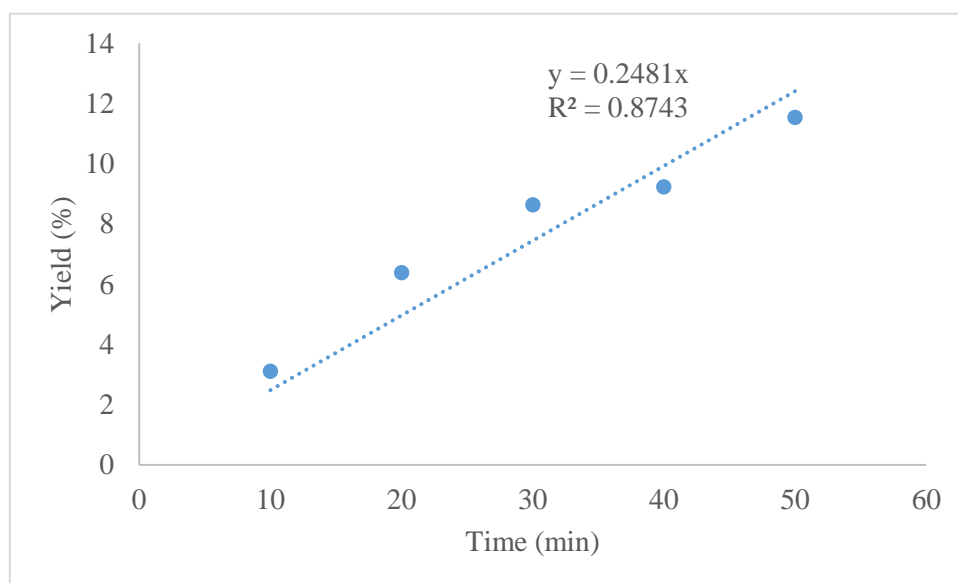

GC calibration curve for **3ac** is displayed below.

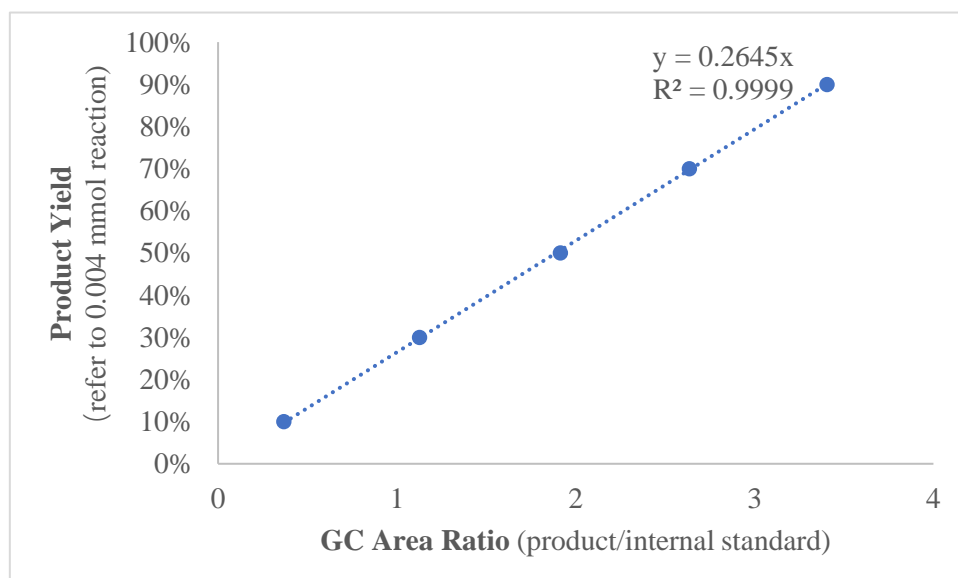

## Competition reactions:

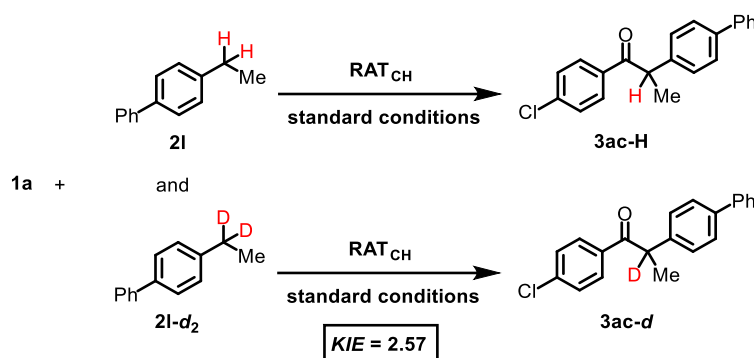

### Ratio of the Product

| Run | Total GC yield | Ratio of <b>3ac-H</b> ,<br><b>3ac-d</b> in <sup>1</sup> H NMR | <i>k<sub>H</sub></i> / <i>k<sub>d</sub></i> |
|-----|----------------|---------------------------------------------------------------|---------------------------------------------|
| 1   | 14.59 %        | 0.72 : 0.28                                                   | 2.57                                        |
| 2   | 15.78 %        | 0.72 : 0.28                                                   | 2.57                                        |

Conditions: 4-chlorobenzaldehyde **1a** (0.004 mmol), 4-ethyl-1,1'-biphenyl (0.008 mmol) and 4-(propan-2-yl-2-*d*)-1,1'-biphenyl (0.008 mmol), HAT reagent **2** (0.020 mmol), **RAT<sub>CH</sub>** (2 mol%), Eosin Y (3 mol%), 20 v/v % DMSO in 100 mM MOPS buffer (pH 8.0, containing 2.5 mM MgSO<sub>4</sub> and 0.15 mM ThDP) were stirred for **3 h** at room temperature under N<sub>2</sub> atmosphere with the irradiation of 450-460 nm LEDs; total volume of the reaction is 0.8 mL. Running six reactions in parallel. After 3 h, two for GC yield determination, while the rest of reactions mixture was combined and then extracted by ethyl acetate and purified by TLC. The resultant pure **3ac** was subjected to <sup>1</sup>H NMR. The KIE ratio was therefore determined by quantitative <sup>1</sup>H NMR spectroscopy.

First run: KIE = 2.57; second run: KIE = 2.57; average: KIE = 2.57.

Note: we have not considered the pH effect of deuterium on the KIE. In our reaction scheme, the hydrogen atom transfer (HAT) pathway, occurring between the methyl radical and ethylbenzene, is responsible for the C-H/D cleavage. Thus, the pH effect of deuterium is expected to play minor roles in this radical pathway.

<sup>1</sup>H NMR (400 MHz, CDCl<sub>3</sub>) spectra of pure **3ac** for the two runs were showed as follows:

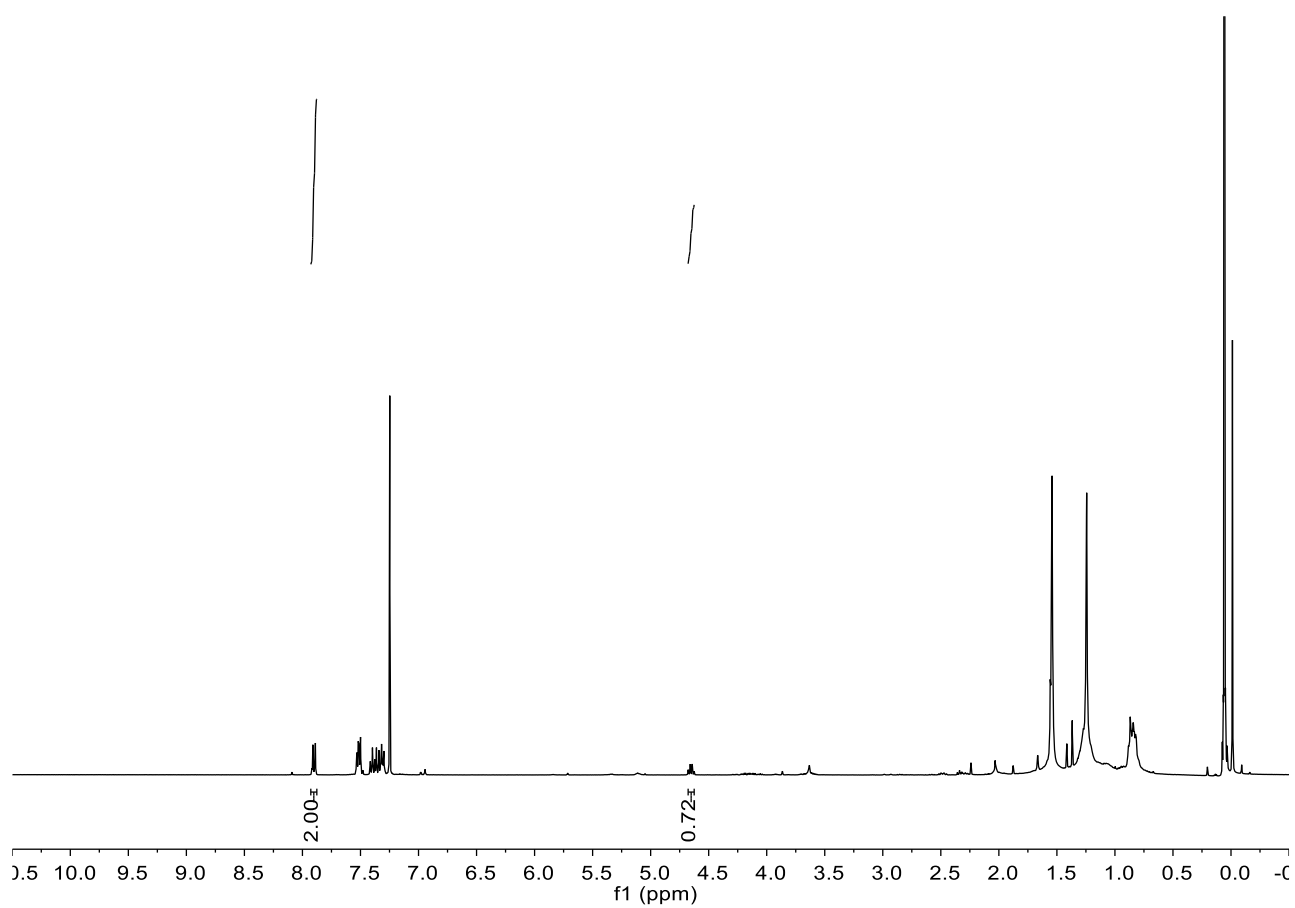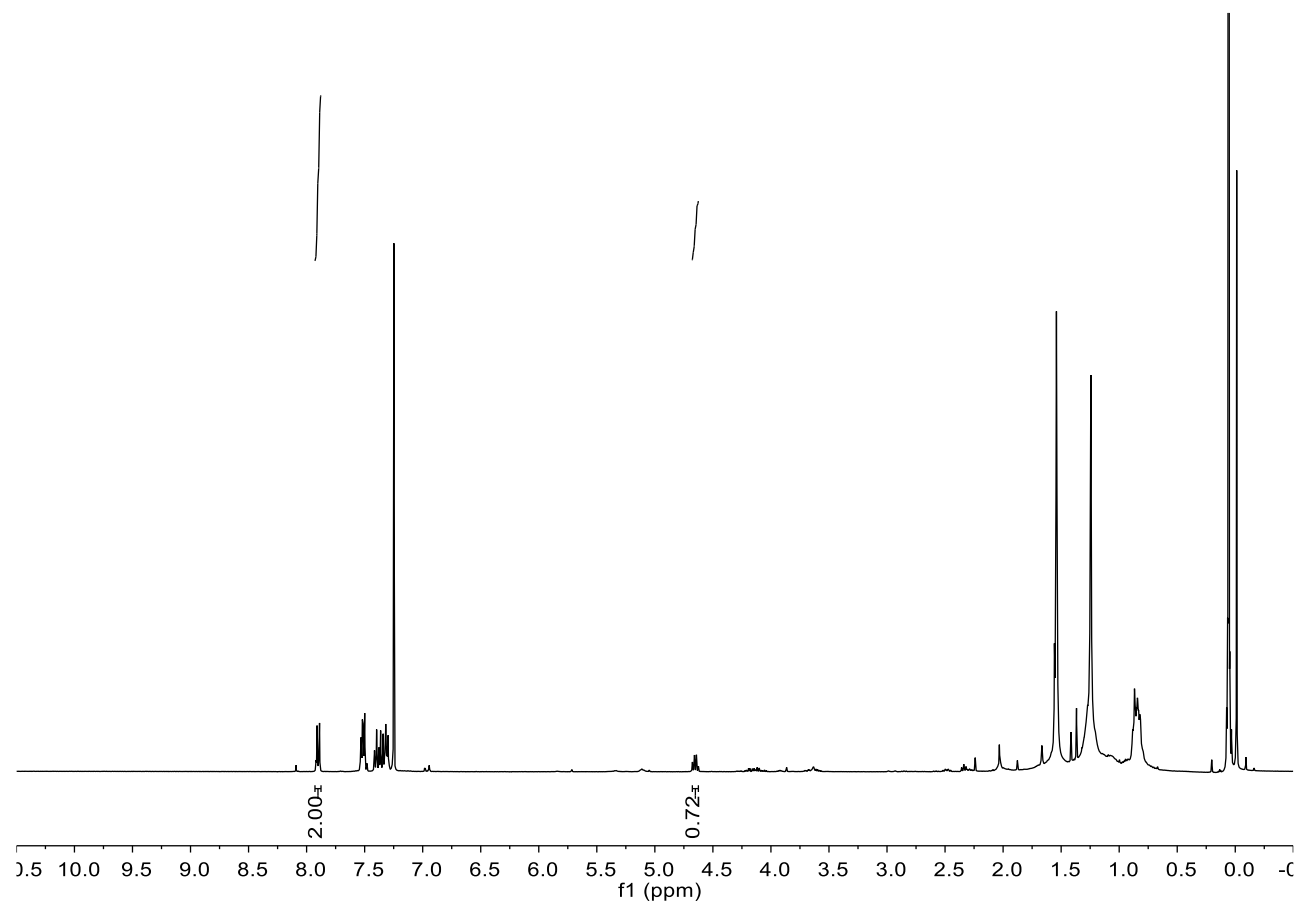

## 6.5 Stern-Volmer Luminescence Quenching Studies

To identify the key species that interacts with the excited Eosin Y, Stern-Volmer luminescence quenching experiments were designed and conducted.

Emission intensities were recorded on a MolecularDevice SpectraMax M3 reader. Samples for the quenching experiments were prepared in a 4 mL screw-top quartz cuvette under a N<sub>2</sub> atmosphere. Solutions of different quenchers in degassed DMSO were prepared. Conditions: different amounts (0.02 mM, 0.04 mM, 0.06 mM, 0.08 mM, 0.10 mM) of quencher solution were added to a solution of the photocatalyst Eosin Y (0.02 mM) in MOPS buffer (100 mM, pH 8.0, containing 2.5 mM MgSO<sub>4</sub> and 0.15 mM ThDP). Each solution was with a total volume of 2 mL with 20 v/v % DMSO. Excitation of the sample was irradiated at 455 nm and emission was measured at 548 nm. As shown in Supplementary Fig. 8a, excited Eosin Y couldn't be quenched by HAT reagent 2. On the other hand, the quenching of the excited Eosin Y by the mixture of **RAT**<sub>CH</sub> and **1a** were recorded although not that efficient (Supplementary Fig. 8b).

These results exclude an oxidative quenching pathway that excited Eosin Y was single electron oxidized by HAT reagent 2.

## 6.6 Discussion on the Organophotoredox Catalysis

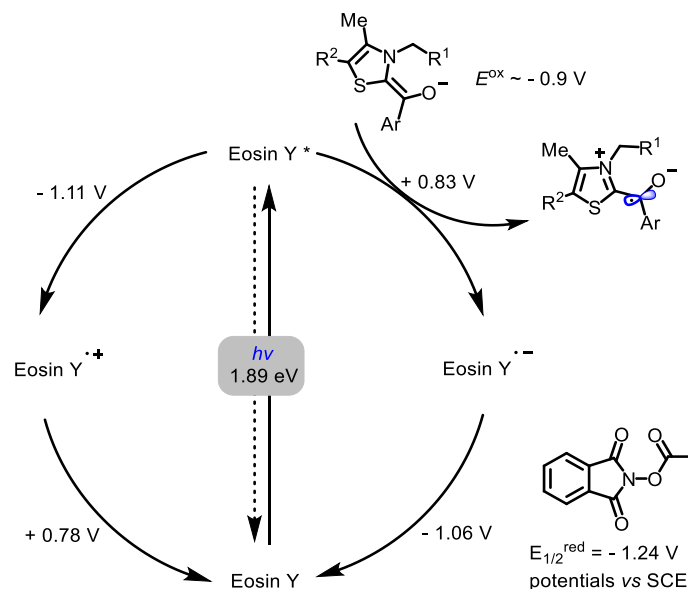

According to the literature, the oxidative potential of Breslow intermediate derivative (**Int. B** derivative) is around  $-0.9$  V vs SCE<sup>8</sup> which is easily single electron oxidized by Eosin Y\* ( $E_{1/2}$  (Eosin Y\* / Eosin Y<sup>•-</sup>) =  $+0.83$  V vs SCE)<sup>9</sup>. Additionally, our spectroelectrochemical studies indicated the enzymatic Breslow intermediate is prone to oxidation (Supplementary Fig. 10). The reduction potential of HAT reagent 2 is around  $-1.24$  V vs SCE<sup>10</sup> and it may be reduced by Eosin Y<sup>•-</sup> ( $E_{1/2}$  (Eosin Y<sup>•-</sup> / Eosin Y) =  $-1.06$  V). These means the proposed reductive quenching photoredox cycle is possible.

In the alternative oxidative quenching photoredox cycle, HAT reagent 2 was single electron reduced by ( $E_{1/2}$  (Eosin Y\* / Eosin Y<sup>•+</sup>) =  $-1.11$  V vs SCE) and then Breslow intermediate derivative (**Int. B**) was single electron oxidized by Eosin Y<sup>•+</sup> ( $E_{1/2}$  (Eosin Y<sup>•+</sup> / Eosin Y) =  $+0.78$  V). This pathway was excluded by Stern-Volmer luminescence quenching studies between Eosin Y\* and HAT reagent 2.

Breslow intermediate derivatives were considered as strong reductive species (Supplementary method section 6.7). But direct single electron transfer between HAT reagent 2 and Breslow intermediate **Int. B** was excluded by the control experiment in which no product was formed without Eosin Y (Supplementary Table 19).

The analysis of redox potentials suggests a reductive quenching pathway of the organophotoredox catalysis.



## 6.7 UV-Visible Spectroelectrochemical Studies

To investigate the transformation of the enzymatic Breslow intermediate formation between **1a** and **RAT<sub>CH</sub>** in the MOPS buffer, in situ UV-visible spectroelectrochemical techniques was employed. Supplementary Fig. 9a-9d shows the cyclic voltammograms of the four samples, the compositions of which are MOPS buffer only, MOPS buffer + **1a**, MOPS buffer + **RAT<sub>CH</sub>**, and MOPS buffer + **1a** + **RAT<sub>CH</sub>**, respectively, for the samples 1, 2, 3, 4.

The experiment employed a three-electrode system comprising a reticulated vitreous carbon (RVC) working electrode, a platinum mesh counter electrode, and an Ag/AgCl quasi-reference electrode (QRE) (Supplementary Fig. 1c). The scan potential ranged from  $-2.0\text{ V} \rightarrow +1.5\text{ V} \rightarrow -2.0\text{ V}$ , with a minimum scan rate of  $1\text{ mV/s}$  due to the use of a thin-layer electrochemical cell. In the optical transparent thin-layer electrochemical cell (with a path length of  $0.2\text{ mm}$ ), using sample 1 as the background, UV-Vis spectra during the electrochemical reaction process were recorded for the four samples (Supplementary Fig. 9e-9h). As shown in Supplementary Fig. 9h, prior to applying the potential, sample 4 exhibited characteristic absorption peaks of protein at  $280\text{ nm}$ . As the potential was gradually decreased from  $+1.5\text{ V}$  to  $-2.0\text{ V}$ , a new broad absorption band at  $424\text{ nm}$  first appeared and then disappeared in the sample 4, as depicted in the magnified view of Supplementary Fig. 9h. This band may be characteristic of the enzymatic Breslow-int.-derived ketyl radical (**Int. C**) as no comparable changes were observed in the control.

Careful analysis of the characteristic absorption peak at  $424\text{ nm}$  for sample 4 (Supplementary Fig. 10), we can see: (1) During the potential ramp from  $-2.0\text{ V}$  to  $+1.5\text{ V}$ , no significant sign observed. At  $+1.5\text{ V}$ , the corresponding enzyme/ThDP-**1a** complex is supposed to be the Breslow-int.-derived cation intermediate, which according to literature<sup>11</sup> and calculated UV-vis absorption spectra (Supplementary Fig. 11), exhibits no visible light absorption band. (2) During the potential ramp from  $+1.5\text{ V}$  to  $-2.0\text{ V}$ , the absorption band at  $424\text{ nm}$  was observed at  $+1.2\text{ V}$ , suggesting the SET reduction of the Breslow-int.-derived cation intermediate to the ketyl radical. At  $+0.4\text{ V}$ , the absorption band at  $424\text{ nm}$  reached its maximum, indicating peak generation of the ketyl radical. Under negative potential  $-2.0\text{ V}$  (ranging from  $+1.5\text{ V}$  to  $-2.0\text{ V}$ ), the reverse electrochemical conditions likely resulted in reduction the ketyl radical back to the initial Breslow-int. intermediate (**Int. B**), leading to the disappearance of the absorption peak at  $424\text{ nm}$ . Again, the visible-light absorption spectrum of the Breslow int. aligns to the literature report<sup>11</sup> and the calculated UV-Vis absorption spectra.

To further probe the ketyl radical intermediates at  $\sim +0.4\text{ V}$ , samples-2, 3, 4 were taken during CV scanning at a reverse potential of  $-0.1\text{ V}$  (ranging from  $+1.5\text{ V}$  to  $-2.0\text{ V}$ ), followed by characterization using EPR (Supplementary Fig. 10b). A characteristic EPR signal was detected for Sample 4 (at  $-0.1\text{ V}$ ). Based on our previous report<sup>1</sup>, this signal could be assigned to be the indicator of the enzymatic Breslow-int.-derived ketyl radical (**Int. C**). Furthermore, time-dependent decay process of the UV-vis characteristic absorption peak at  $424\text{ nm}$  after the cessation of applying a potential of  $+0.396\text{ V}$  was depicted in Supplementary Fig. 10c-d. After 80 minutes, the intensity of the absorption peak gradually decreases until it nearly disappears, which is consistent with the quenching process of a radical intermediate.

## 6.8 Michaelis Menten Kinetics Measurement

Steady-state kinetic studies were carried out using purified enzyme *PfBAL* and **RAT<sub>CH</sub>**, respectively, with the concentration of 4-chlorobenzaldehyde **1a** ranging from 0.5 mM to 30 mM. To determine the initial reaction rates, we measured the amount of **3a** formed at different time points: 10 min, 15 min, 20 min, 25 min, and 30 min for the *PfBAL*-catalysed reactions, and 2 min, 4 min, 6 min, 8 min, and 10 min for the **RAT<sub>CH</sub>**-catalysed reactions. Then, the initial rates were calculated based on the **3a**-concentration-time curves. Rates were repeated twice. Michaelis Menten curves were thereby obtained based on kinetic studies.

**Experimental procedure:** Stock solutions of **1a** in DMSO with varying concentrations were prepared by serial dilution (1200 mM, 800 mM, 600 mM, 400 mM, 320 mM, 240 mM, 160 mM, 80 mM, 40 mM and 20 mM; this corresponded to a final concentration of 30 mM, 20 mM, 15 mM, 10 mM, 8 mM, 6 mM, 4 mM, 2 mM, 1 mM and 0.5 mM, respectively, when 20  $\mu$ L of the stock solution was used for each reaction). The initial rate measurements using *PfBAL* or **RAT<sub>CH</sub>** (0.05 mM) were performed in  $\sim$  620  $\mu$ L MOPS buffer (100 mM, 2.5 mM MgSO<sub>4</sub>, 0.15 mM ThDP, pH 8.0) and 20  $\mu$ L Eosin Y (150  $\mu$ M final concentration), 140  $\mu$ L DMSO containing ethylbenzene **2a** (300 mM final concentration) and HAT reagent 2 (400 mM final concentration); substrate **1a** (20  $\mu$ L, 0.5 mM to 20 mM final concentration) in a 4 mL clear glass vial containing a stir bar, illuminated with a 450-460 nm LEDs. Accordingly, after illumination with stirring, ethyl acetate (1.0 mL) and 20.0  $\mu$ L of an internal standard stock (2 v/v % of *n*-dodecane in ethyl acetate) were added to the reaction mixture and mixed thoroughly. The organic phase was separated and then analysed by GC to determine the amount of **3a** formed.

Initial rates under different concentrations of **1a** catalysed by *Pf*BAL:

| <b>1a</b> (mM) | First test: $v_1$ (mM/s) | Second test: $v_2$ (mM/s) |
|----------------|--------------------------|---------------------------|
| 0.5            | 0.000012221              | 0.0000048671              |
| 1              | 0.000011275              | 0.0000094348              |
| 2              | 0.000012638              | 0.000015099               |
| 4              | 0.000030771              | 0.000029311               |
| 6              | 0.000033136              | 0.000029404               |
| 8              | 0.000044347              | 0.000038148               |
| 10             | 0.000048971              | 0.000048494               |
| 15             | 0.000047546              | 0.000058118               |
| 20             | 0.000050455              | 0.000048137               |
| 30             | 0.000061991              | 0.00005983                |

Michaelis Menten curves for *Pf*BAL:

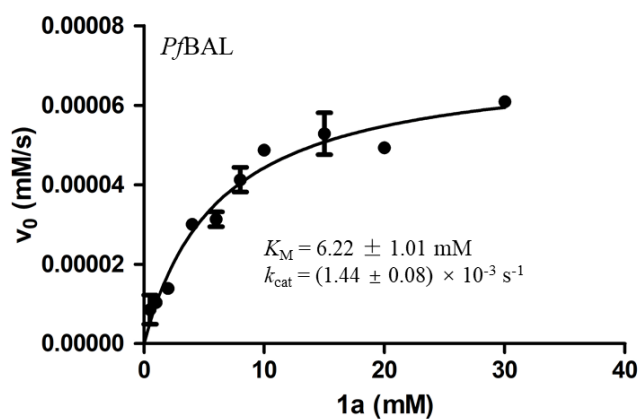

Initial rates under different concentrations of **1a** catalysed by **RAT<sub>CH</sub>**:

| <b>1a</b> (mM) | First test: $v_1$ (mM/s) | Second test: $v_2$ (mM/s) |
|----------------|--------------------------|---------------------------|
| 0.5            | 0.000033236              | 0.000050165               |
| 1              | 0.00012037               | 0.00019191                |
| 2              | 0.00029106               | 0.0002392                 |
| 4              | 0.00048471               | 0.00058282                |
| 6              | 0.00060597               | 0.00064264                |
| 8              | 0.00082953               | 0.00077988                |
| 10             | 0.00085366               | 0.00089468                |
| 15             | 0.00098636               | 0.00092937                |
| 20             | 0.00096786               | 0.0011296                 |
| 30             | 0.0011138                | 0.0011399                 |

Michaelis Menten curves for **RAT<sub>CH</sub>**:

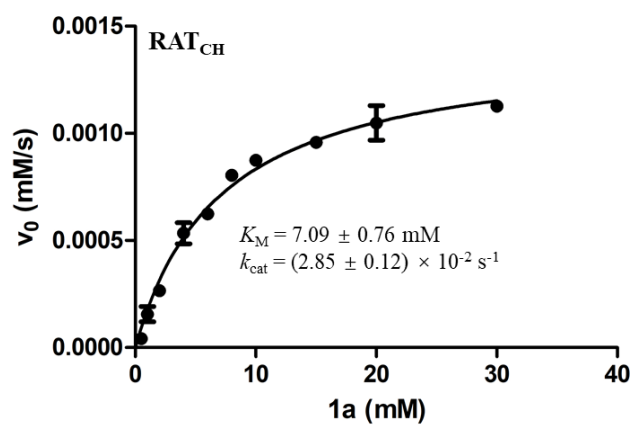

## 7. Computational Studies

### 7.1 System Setup and Molecular Dynamics (MD) Simulations

The structures of mutants (W163C/Y397A/A480G/T481L) were built based on SWISS-MODEL<sup>12</sup> homology modelling, the template was their wild-type structure (PDB code: 3D7K). **2a** radical (**Int. E**) was docked using AutoDock Vina<sup>13</sup>. It is worth noting that when **Int. E** was docked into the vacated position, two different binding modes were obtained (H-forward & H-backward, see Fig. 4f). We assigned the protonation status of titratable residues (His, Glu, Asp) based on the pKa values from the PROPKA software<sup>14</sup> in combination with a careful visual inspection of local hydrogen-bonded networks. His21, His29, His40, His49, His113, His130, His137, His185, His294, His318, His371, His374, and His280 were protonated at the  $\epsilon$  position, His55, His286 and His 483 were protonated at the  $\delta$  position, while all the Glu and Asp residues were deprotonated. The Amber ff14SB<sup>15</sup> force field was employed for the protein residues, while the general AMBER GAFF<sup>16</sup> was used for substrates. The partial atomic charges of substrates were obtained from the RESP<sup>17</sup> at the B3LYP/6-31G(d) level of theory. Sodium ions were added to the protein surface to neutralize the total charge of the systems. Finally, the resulting system was solvated in a rectangular box of TIP3P waters extending up to a minimum distance of 16 Å from the protein surface. After proper setup, the whole system was fully minimized using combined steepest descent and conjugate gradient method. Then, the system was gently annealed from 0 to 300 K under NVT ensemble for 50 ps with a weak restraint of 25 kcal/mol/Å on protein. To achieve a uniform density after heating dynamics, 1 ns of density equilibration was performed under the NPT ensemble at the target temperature of 300 K and target pressure of 1.0 atm. Afterward, further equilibrated the system for 4 ns under the NPT ensemble to get the well-settled pressure and temperature. Finally, a 200 ns productive MD simulation was performed under the NPT ensemble. During all MD simulations, the covalent bonds containing hydrogen were constrained using SHAKE<sup>18</sup> and an integration step of 2 fs was used. All MD simulations were performed with GPU version of Amber 20<sup>19</sup> package.

## 7.2 QM/MM Calculations for Enzymatic Reactions

All QM/MM<sup>20</sup> calculations were performed using ChemShell<sup>21</sup> combining Turbomole<sup>22</sup> for the QM region and DL\_POLY<sup>23</sup> for the MM region. The electronic embedding scheme was used to account for the polarizing effect of the enzyme environment on the QM region. Hydrogen link atoms with the charge-shift model were applied to treat the QM/MM boundary. For radical cross-coupling reactions, the QM region consists of the Int. C and Int. E complex (Fig. 4f). During QM/MM geometry optimizations, the QM region was studied with the B3LYP density functional with two levels of theory. For geometry optimization, the double- $\zeta$  basis set def2-SVP, collectively labeled as B1, was used. The energies were further corrected with the larger basis set def2-TZVP for all atoms, labeled as B2. Dispersion corrections computed with Grimme's D3 method were included in all QM calculations.

### 7.3 QM Calculations for Radical Generation

All DFT calculations were performed with the Gaussian 16, Revision A.03 software<sup>24</sup>. All geometry optimizations are conducted in conjunction with the SMD<sup>25</sup> continuum solvation model at the B3LYP-D3/def2-SVP level of theory. The energies were further refined with the larger basis set def2-TZVP for all atoms. The solvent of chlorobenzene ( $\epsilon = 5.6$ ) was used to simulate the protein environment effects. Harmonic frequency calculations were performed at the same level of theory as the optimizations to estimate the Gibbs free energies corrections.

## 7.4 Spectral Calculations

The possible key intermediates (see Supplementary Fig. 11) were first optimized at wB97XD/6-31+G(d) level. Then, the single-point TDDFT calculations at wB97XD/6-31+G(d) levels were performed to compute the UV-Vis spectrum. All TDDFT calculations were performed with Gaussian 16, Revision A.03.

Note: Based on our mechanistic studies, it is suggested that the photoinduced generation of the prochiral radical (**Int. E**) occurs outside the active site, with minimal influence from the protein environment. Therefore, we simplified the computational model by using a QM model for the calculations related to the formation of **Int. E** (Fig. 4c and 4f). Regarding the radical cross-coupling step (**Int. E** + **Int. C**  $\rightarrow$  **Int. F**), this must occur within the active site. Consequently, we used a QM/MM model for the calculations associated with this step.

Additionally, we used the B3LYP-D3/def2-SVP level to optimize the structure of key species (such as, Fig. 4f & h) in the ground state. For the excited-state properties calculations, we have applied the wB97XD/6-31+G(d) level to calculate the key excited-state species (see, Fig 4c & Supplementary Fig. 11). The function of wB97XD has been demonstrated to be practical for studying the excited properties according to extensive work from our group and other groups<sup>26,27</sup>.



## 8. Experimental and Characterization Data of Racemic Products

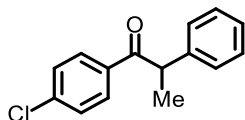

### 1-(4-Chlorophenyl)-2-phenylpropan-1-one (**3a**)

By using the typical procedure described in Section 4, the reaction of 4-chlorobenzaldehyde **1a** (0.004 mmol) and ethylbenzene **2a** (0.016 mmol) catalysed by **RAT<sub>CH</sub>** (2 mol%) afforded **3a** in 61% **GC yield** (average of duplicate runs), with a 94% ee.

GC calibration curve for **3a** is displayed below.

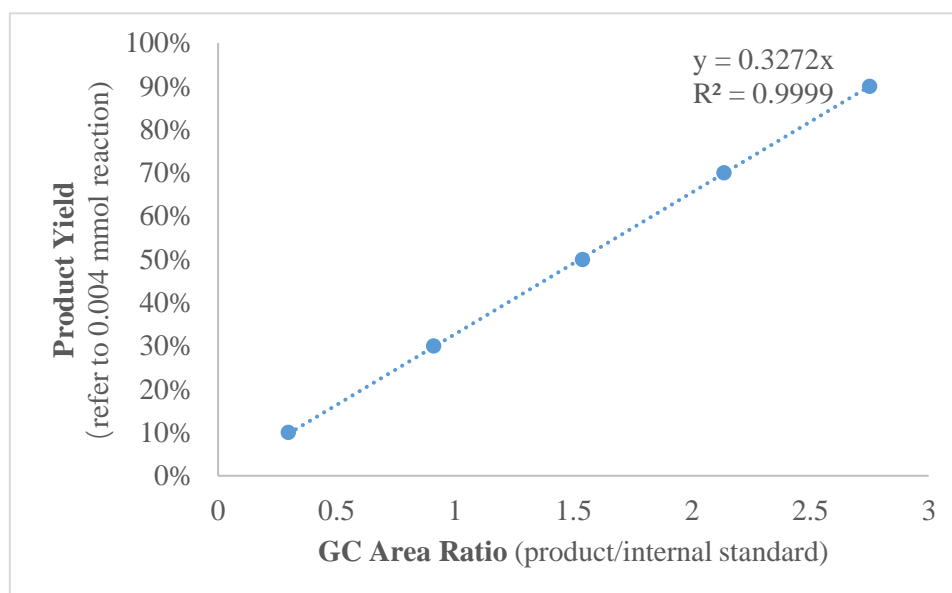

**Enantiomeric excess** was established by HPLC analysis using a Chiralpak AS-H column (HPLC: AS-H, 254 nm, *n*-hexane/isopropanol = 95:5, flow rate 0.5 mL/min, 30 °C, *t<sub>r</sub>* (major) = 9.27 min, *t<sub>r</sub>* (minor) = 10.23 min).

HPLC trace of *rac*-**3a**:

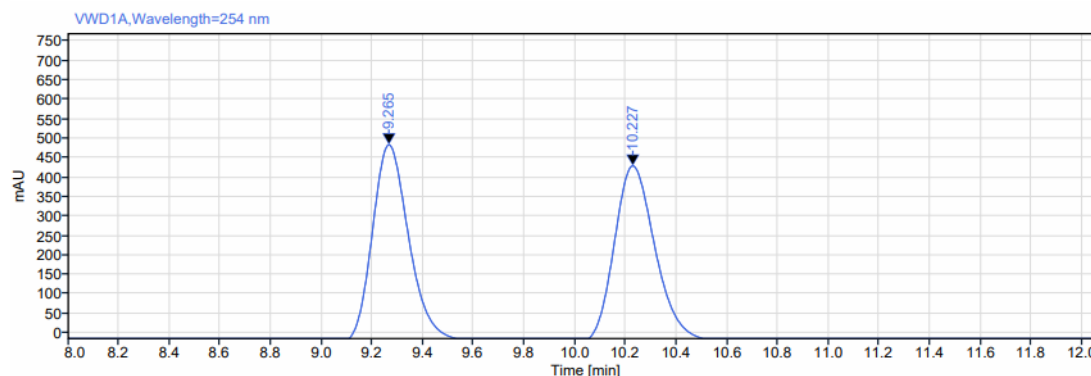

Signal: VWD1A,Wavelength=254 nm

| RT [min] | Type | Area     | Height | Area% |
|----------|------|----------|--------|-------|
| 9.265    | BB   | 5268.10  | 512.00 | 49.99 |
| 10.227   | BB   | 5270.10  | 457.42 | 50.01 |
|          | Sum  | 10538.19 |        |       |

HPLC trace of enantioenriched-**3a** obtained in a 0.004 mmol reaction:

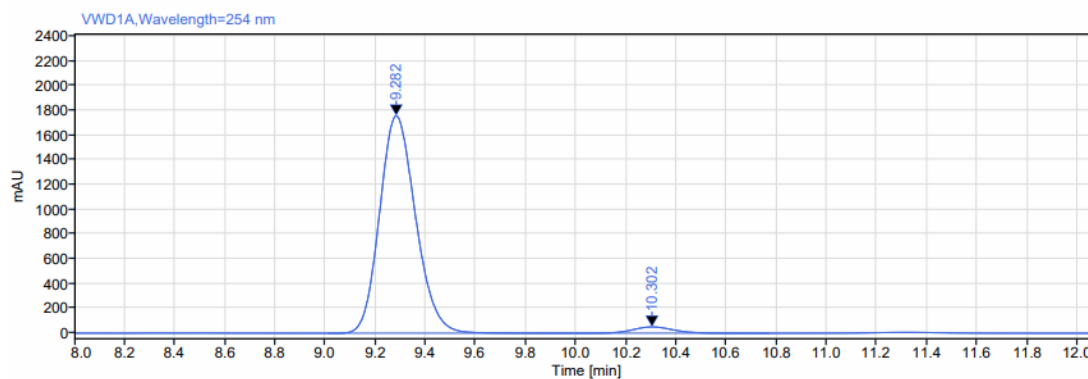

Signal: VWD1A,Wavelength=254 nm

| RT [min] | Type | Area     | Height  | Area% |
|----------|------|----------|---------|-------|
| 9.282    | BB   | 17545.98 | 1758.64 | 96.86 |
| 10.302   | BB   | 568.61   | 50.77   | 3.14  |
|          | Sum  | 18114.59 |         |       |

*Rac*-**3a** is a colorless oil (1.22 g, 84%). The NMR spectra of *rac*-**3a** match the one previously reported<sup>28</sup>.

<sup>1</sup>H NMR (400 MHz, CDCl<sub>3</sub>)  $\delta$  7.91-7.83 (m, 2H), 7.37-7.30 (m, 2H), 7.31-7.16 (m, 5H), 4.61 (q, *J* = 6.8 Hz, 1H), 1.52 (d, *J* = 6.8 Hz, 3H).

<sup>13</sup>C NMR (100 MHz, CDCl<sub>3</sub>)  $\delta$  199.0, 141.2, 139.1, 134.7, 130.2, 129.1, 128.8, 127.7, 127.0, 48.1, 19.4.

MS (EI, *m/z*) calcd. for C<sub>15</sub>H<sub>13</sub>ClO [M]<sup>+</sup> 244.1, found: 244.0.

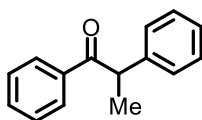

### 1,2-Diphenylpropan-1-one (**3b**)

By using the typical procedure described in Section 4, the reaction of benzaldehyde **1b** (0.004 mmol) and ethylbenzene **2a** (0.016 mmol) catalysed by **RAT<sub>CH</sub>** (2 mol%) afforded **3b** in 59% GC yield (average of duplicate runs), with a 88% ee.

GC calibration curve for **3b** is displayed below.

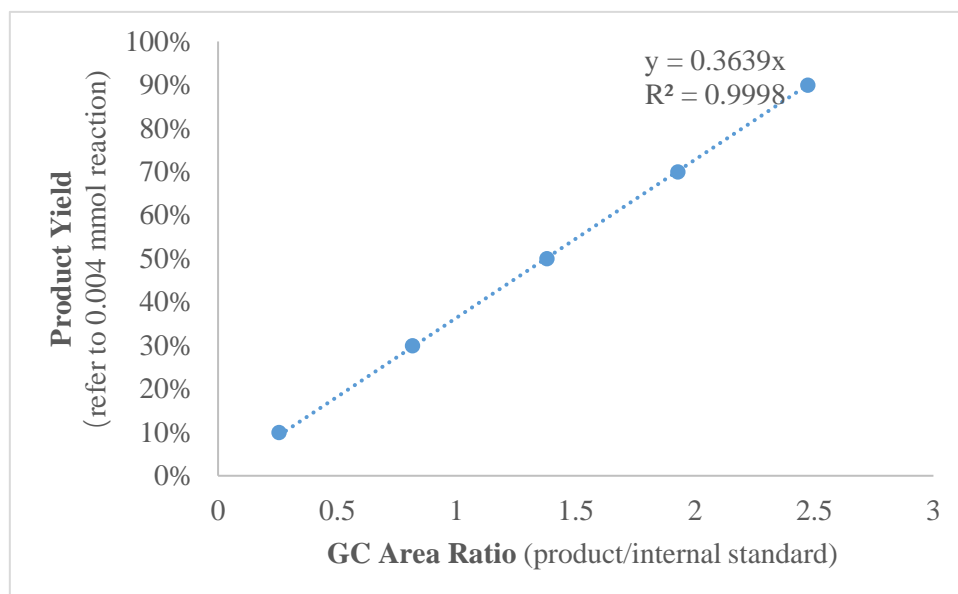

**Enantiomeric excess** was established by HPLC analysis using a Chiralpak AS-H column (HPLC: AS-H, 254 nm, *n*-hexane/isopropanol = 95:5, flow rate 0.5 mL/min, 30 °C,  $t_r$  (major) = 9.07 min,  $t_r$  (minor) = 9.77 min).

HPLC trace of *rac*-**3b**:

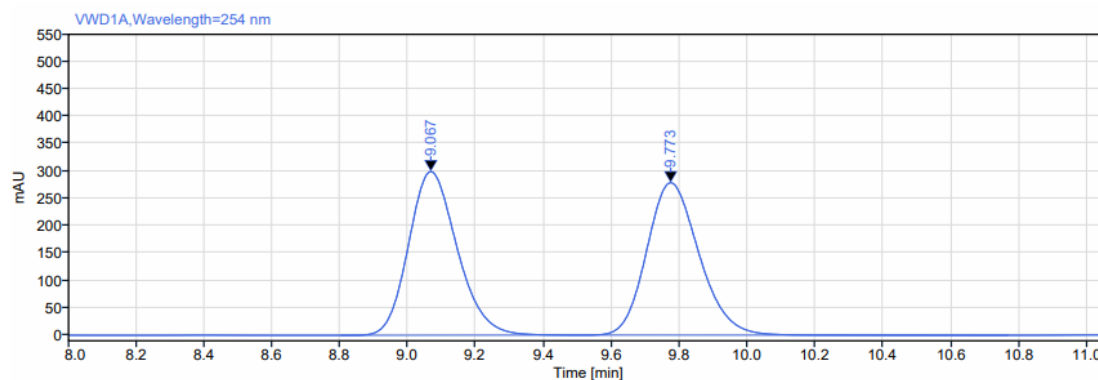

Signal: VWD1A, Wavelength=254 nm

| RT [min] | Type | Area    | Height | Area% |
|----------|------|---------|--------|-------|
| 9.067    | BB   | 2976.54 | 299.11 | 49.94 |
| 9.773    | BB   | 2983.20 | 278.59 | 50.06 |
|          | Sum  | 5959.74 |        |       |

HPLC trace of enantioenriched-**3b** obtained in a 0.004 mmol reaction:

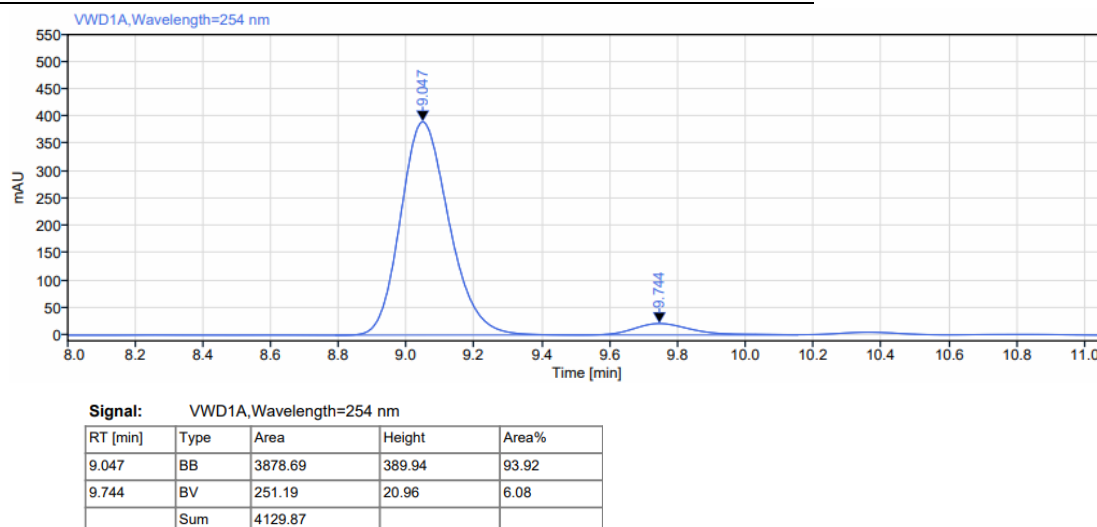

*Rac-3b* is a colorless oil (862 mg, 82%). The NMR spectra of *rac-3b* match the one previously reported<sup>29</sup>.

**<sup>1</sup>H NMR (400 MHz, CDCl<sub>3</sub>)**  $\delta$  7.98-7.93 (m, 2H), 7.51-7.42 (m, 1H), 7.41-7.33 (m, 2H), 7.31-7.26 (m, 4H), 7.24-7.15 (m, 1H), 4.67 (q,  $J$  = 6.8 Hz, 1H), 1.53 (d,  $J$  = 6.8 Hz, 3H).

**<sup>13</sup>C NMR (100 MHz, CDCl<sub>3</sub>)**  $\delta$  200.3, 141.4, 136.5, 132.7, 128.9, 128.7, 128.4, 127.7, 126.9, 47.9, 19.5.

**MS** (EI,  $m/z$ ) calcd. for C<sub>15</sub>H<sub>14</sub>O [M]<sup>+</sup> 210.1, found: 210.1.

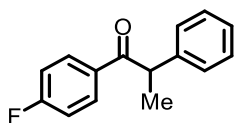

**1-(4-Fluorophenyl)-2-phenylpropan-1-one (3c)**

By using the typical procedure described in Section 4, the reaction of 4-fluorobenzaldehyde **1c** (0.004 mmol) and ethylbenzene **2a** (0.016 mmol) catalysed by **RAT<sub>CH</sub>** (2 mol%) afforded **3c** in 66% **GC yield** (average of duplicate runs), with a 94% ee.

GC calibration curve for **3c** is displayed below.

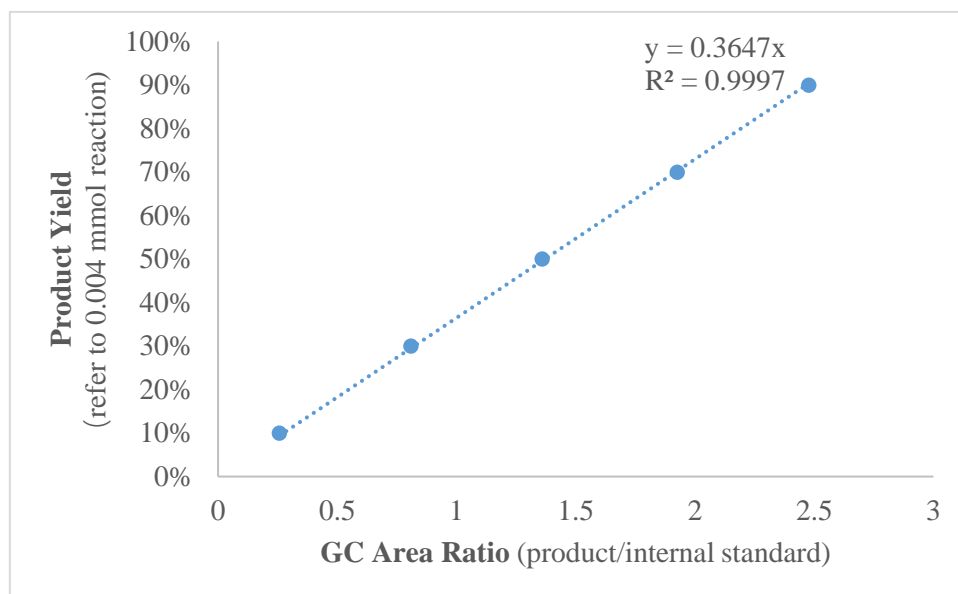

**Enantiomeric excess** was established by HPLC analysis using a Chiralpak AS-H column (HPLC: AS-H, 254 nm, *n*-hexane/isopropanol = 95:5, flow rate 0.5 mL/min, 30 °C,  $t_r$  (major) = 9.21 min,  $t_r$  (minor) = 10.21 min).

HPLC trace of *rac*-**3c**:

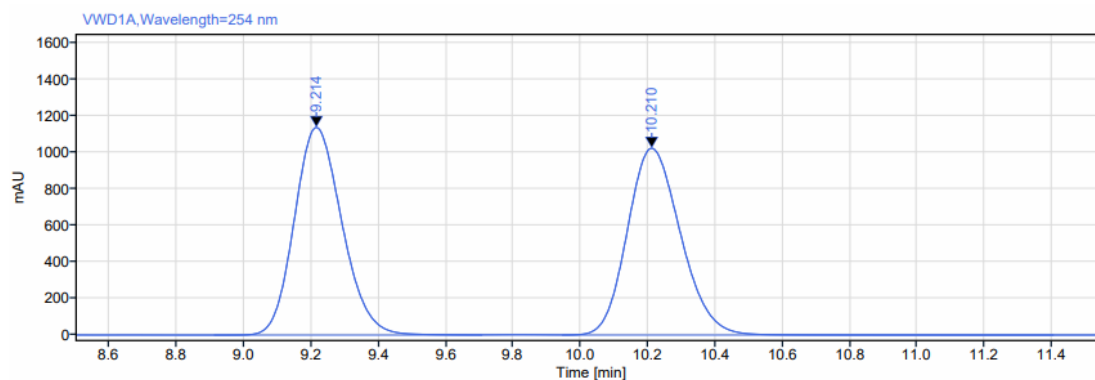

Signal: VWD1A, Wavelength=254 nm

| RT [min] | Type | Area     | Height  | Area% |
|----------|------|----------|---------|-------|
| 9.214    | BV   | 11221.34 | 1139.83 | 49.89 |
| 10.210   | VB   | 11272.59 | 1025.48 | 50.11 |
|          | Sum  | 22493.92 |         |       |

HPLC trace of enantioenriched-**3c** obtained in a 0.004 mmol reaction:

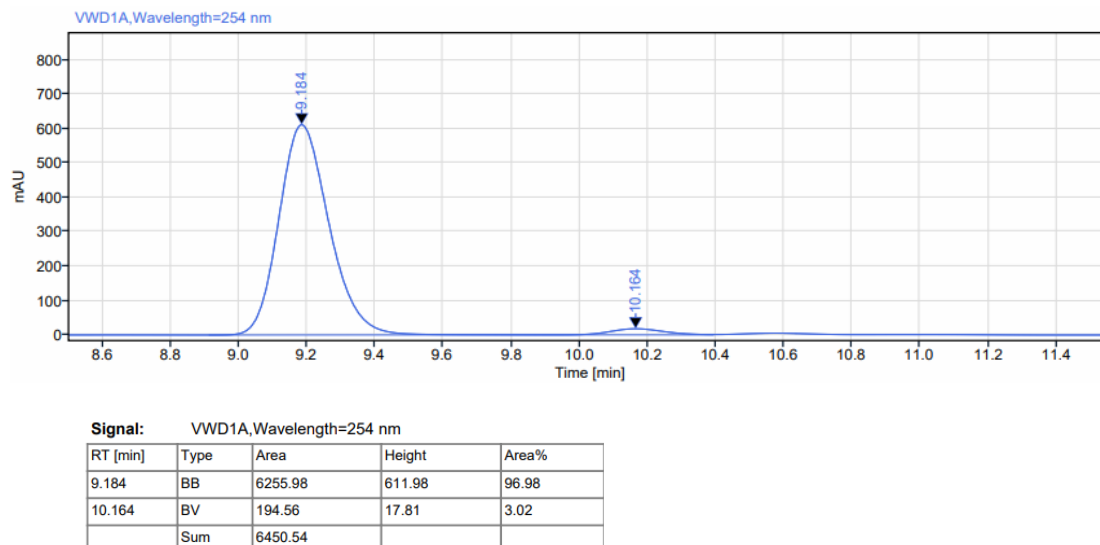

*Rac*-**3c** is a colorless oil (256 mg, 78%). The NMR spectra of *rac*-**3c** match the one previously reported<sup>28</sup>.

**<sup>1</sup>H NMR (400 MHz, CDCl<sub>3</sub>)**  $\delta$  8.01-7.92 (m, 2H), 7.33-7.22 (m, 4H), 7.24-7.16 (m, 1H), 7.08-6.98 (m, 2H), 4.62 (q,  $J$  = 6.8 Hz, 1H), 1.52 (d,  $J$  = 6.8 Hz, 3H).

**<sup>13</sup>C NMR (100 MHz, CDCl<sub>3</sub>)**  $\delta$  198.6, 165.4 (d,  $J$  = 252.8 Hz), 141.3, 132.8, 131.4 (d,  $J$  = 9.4 Hz), 129.0, 127.6, 127.0, 115.5 (d,  $J$  = 21.7 Hz), 48.0, 19.5.

**MS** (EI,  $m/z$ ) calcd. for C<sub>15</sub>H<sub>13</sub>FO [M]<sup>+</sup> 228.1, found: 228.1.

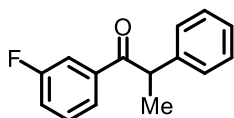

### 1-(3-Fluorophenyl)-2-phenylpropan-1-one (**3d**)

By using the typical procedure described in Section 4, the reaction of 3-fluorobenzaldehyde **1d** (0.004 mmol) and ethylbenzene **2a** (0.016 mmol) catalysed by **RAT<sub>CH</sub>** (2 mol%) afforded **3d** in 51% **GC yield** (average of duplicate runs), with a 87% ee.

GC calibration curve for **3d** is displayed below.

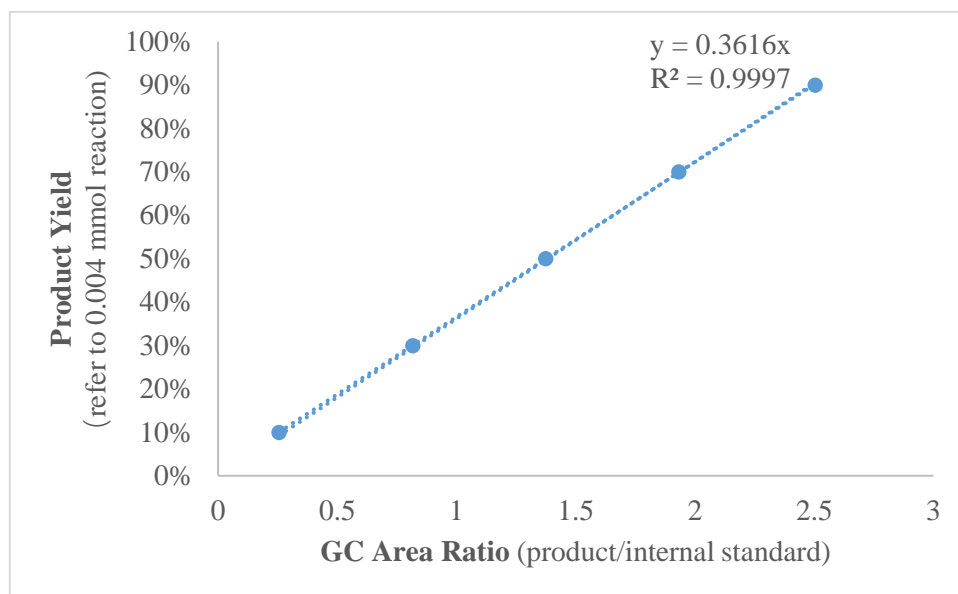

**Enantiomeric excess** was established by HPLC analysis using a Chiralpak AS-H column (HPLC: AS-H, 254 nm, *n*-hexane/isopropanol = 95:5, flow rate 0.5 mL/min, 30 °C,  $t_r$  (major) = 8.58 min,  $t_r$  (minor) = 9.13 min).

HPLC trace of *rac*-**3d**:

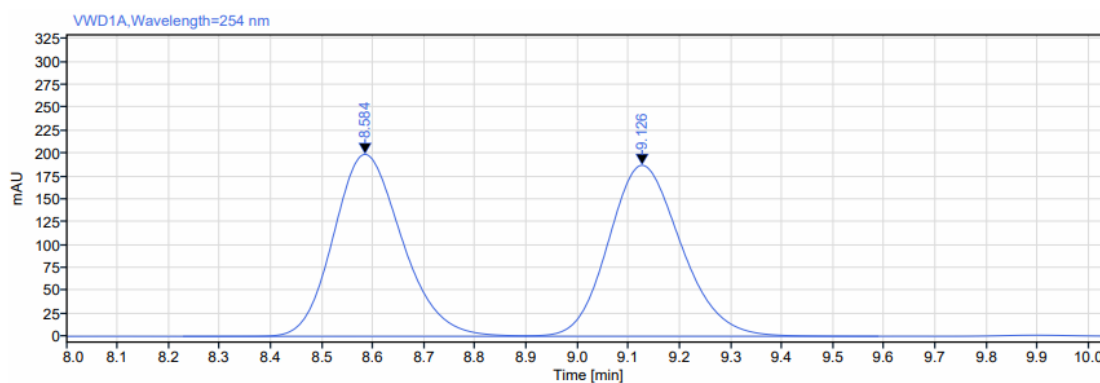

Signal: VWD1A, Wavelength=254 nm

| RT [min] | Type | Area    | Height | Area% |
|----------|------|---------|--------|-------|
| 8.584    | BV   | 1859.35 | 199.10 | 50.08 |
| 9.126    | VB   | 1853.56 | 187.06 | 49.92 |
|          | Sum  | 3712.91 |        |       |

HPLC trace of enantioenriched-**3d** obtained in a 0.004 mmol reaction:

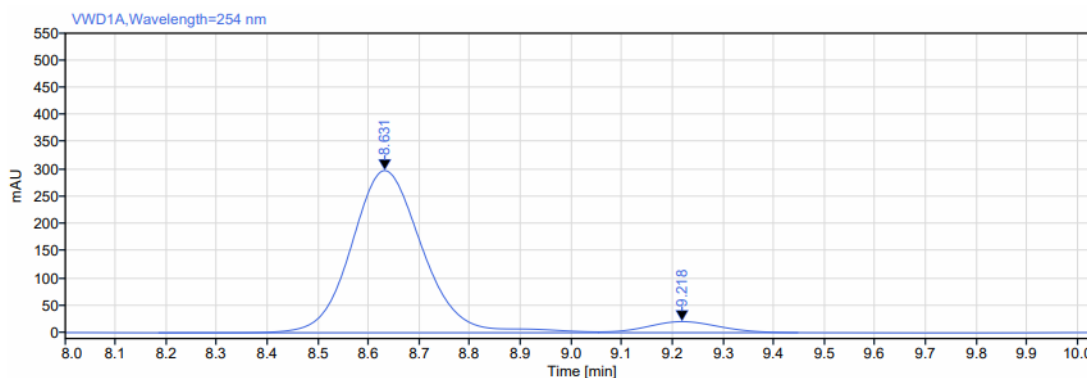

Signal: VWD1A, Wavelength=254 nm

| RT [min] | Type | Area    | Height | Area% |
|----------|------|---------|--------|-------|
| 8.631    | BM m | 2904.05 | 297.56 | 93.49 |
| 9.218    | MM m | 202.10  | 20.42  | 6.51  |
|          | Sum  | 3106.15 |        |       |

*Rac-3d* is a colorless oil (104 mg, 85%). The NMR spectra of *rac-3d* match the one previously reported<sup>30</sup>.

**<sup>1</sup>H NMR (400 MHz, CDCl<sub>3</sub>)**  $\delta$  7.74-7.68 (m, 1H), 7.66-7.58 (m, 1H), 7.37-7.23 (m, 5H), 7.24-7.16 (m, 1H), 7.19-7.10 (m, 1H), 4.61 (q,  $J$  = 6.8 Hz, 1H), 1.53 (d,  $J$  = 6.8 Hz, 3H).

**<sup>13</sup>C NMR (100 MHz, CDCl<sub>3</sub>)**  $\delta$  198.9 (d,  $J$  = 2.2 Hz), 162.7 (d,  $J$  = 246.3 Hz), 141.0, 138.6 (d,  $J$  = 6.1 Hz), 130.0 (d,  $J$  = 7.6 Hz), 129.1, 127.7, 127.0, 124.4 (d,  $J$  = 3 Hz), 119.7 (d,  $J$  = 21.2 Hz), 115.4 (d,  $J$  = 22.2 Hz), 48.2, 19.4.

**MS** (EI,  $m/z$ ) calcd. for C<sub>15</sub>H<sub>13</sub>FO [M]<sup>+</sup> 228.1, found: 228.1.

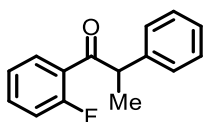

### 1-(2-Fluorophenyl)-2-phenylpropan-1-one (**3e**)

By using the typical procedure described in Section 4, the reaction of 2-fluorobenzaldehyde **1e** (0.004 mmol) and ethylbenzene **2a** (0.016 mmol) catalysed by **RAT<sub>CH</sub>** (2 mol%) afforded **3e** in 38% **GC yield** (average of duplicate runs), with a 70% ee.



GC calibration curve for **3e** is displayed below.

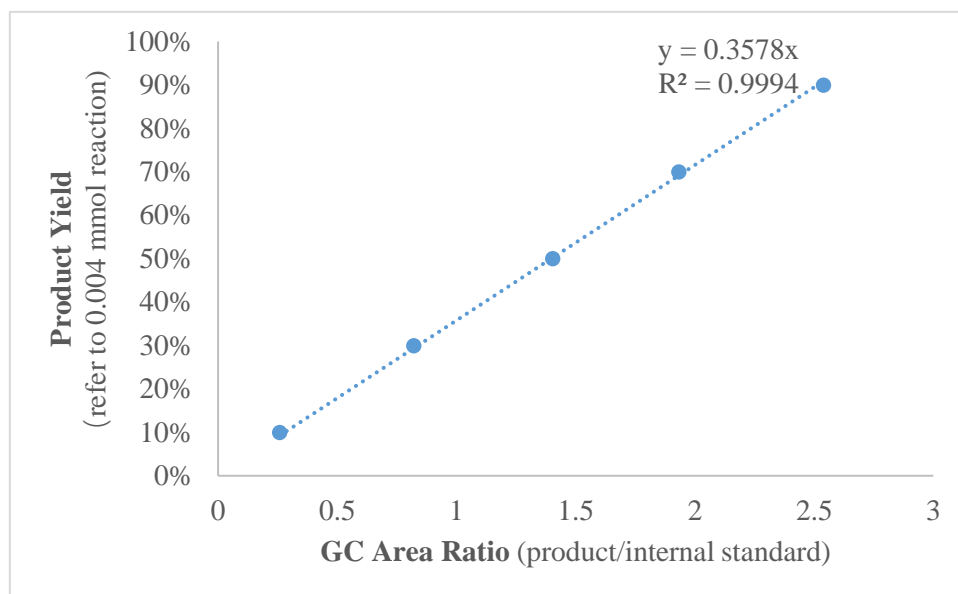

**Enantiomeric excess** was established by HPLC analysis using a Chiralpak AS-H column (HPLC: AS-H, 254 nm, *n*-hexane/isopropanol = 95:5, flow rate 0.5 mL/min, 30 °C,  $t_r$  (major) = 8.83 min,  $t_r$  (minor) = 9.26 min).

HPLC trace of *rac*-**3e**:

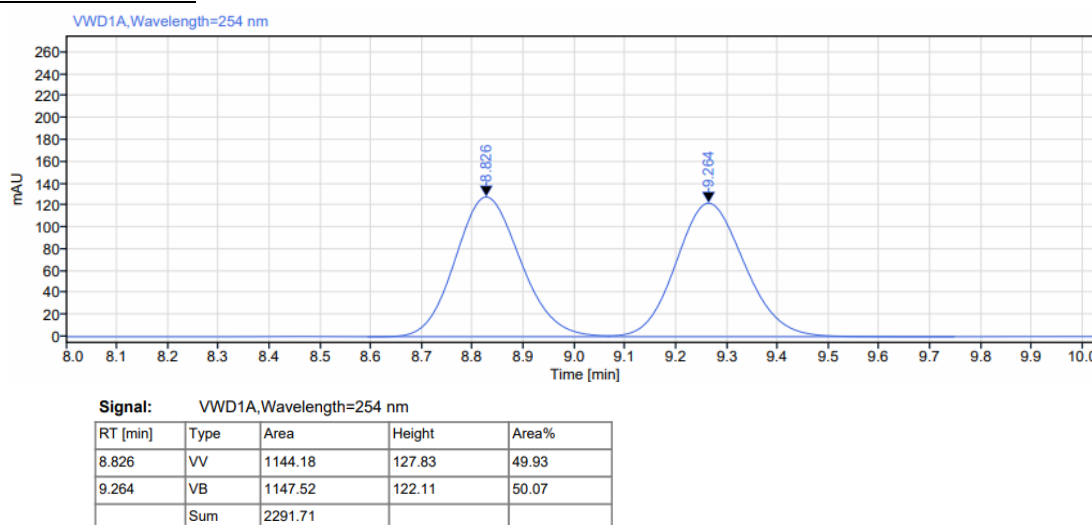

HPLC trace of enantioenriched-**3e** obtained in a 0.004 mmol reaction:

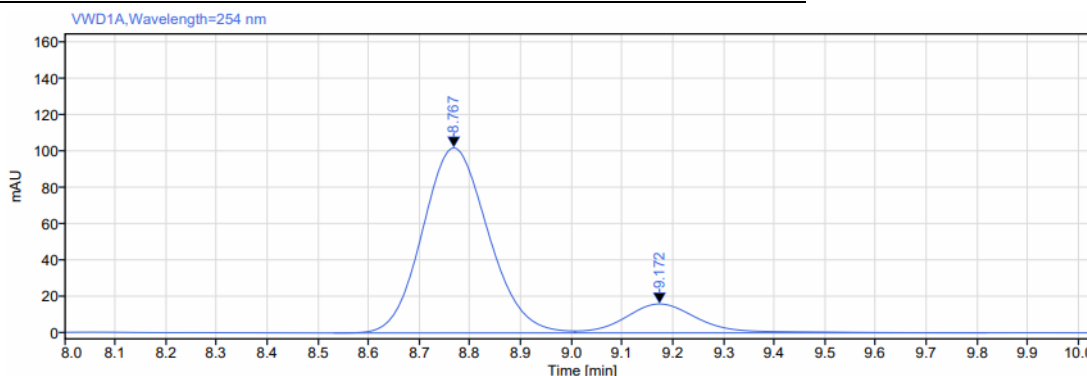

Signal: VWD1A,Wavelength=254 nm

| RT [min] | Type | Area    | Height | Area% |
|----------|------|---------|--------|-------|
| 8.767    | BV   | 917.70  | 101.96 | 85.05 |
| 9.172    | VB   | 161.33  | 15.96  | 14.95 |
|          | Sum  | 1079.03 |        |       |

*Rac-3e* is a colorless oil (123 mg, 65%). The NMR spectra of *rac-3e* match the one previously reported<sup>31</sup>.

**<sup>1</sup>H NMR (400 MHz, CDCl<sub>3</sub>)**  $\delta$  7.71 (td,  $J$  = 7.6, 1.9 Hz, 1H), 7.45-7.35 (m, 1H), 7.29 -7.22 (m, 4H), 7.22-7.14 (m, 1H), 7.17-7.09 (m, 1H), 7.07-6.97 (m, 1H), 4.60 (q,  $J$  = 6.9 Hz, 1H), 1.53 (d,  $J$  = 6.9 Hz, 3H).

**<sup>13</sup>C NMR (100 MHz, CDCl<sub>3</sub>)**  $\delta$  199.7 (d,  $J$  = 4.3 Hz), 160.9 (d,  $J$  = 252.0 Hz), 140.5, 134.0 (d,  $J$  = 9.0 Hz), 131.0 (d,  $J$  = 2.8 Hz), 128.7, 128.1, 126.9, 126.1 (d,  $J$  = 13.2 Hz), 124.4 (d,  $J$  = 3.3 Hz), 116.5 (d,  $J$  = 23.8 Hz), 51.9 (d,  $J$  = 6.3 Hz), 18.9.

MS (EI,  $m/z$ ) calcd. for C<sub>15</sub>H<sub>13</sub>FO [M]<sup>+</sup> 228.1, found: 228.1.

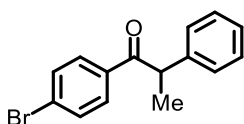

### 1-(4-Bromophenyl)-2-phenylpropan-1-one (3f)

By using the typical procedure described in Section 4, the reaction of 4-bromobenzaldehyde **1f** (0.004 mmol) and ethylbenzene **2a** (0.016 mmol) catalysed by RAT<sub>CH</sub> (2 mol%) afforded **3f** in 59% GC yield (average of duplicate runs), with a 94% ee.

GC calibration curve for **3f** is displayed below.

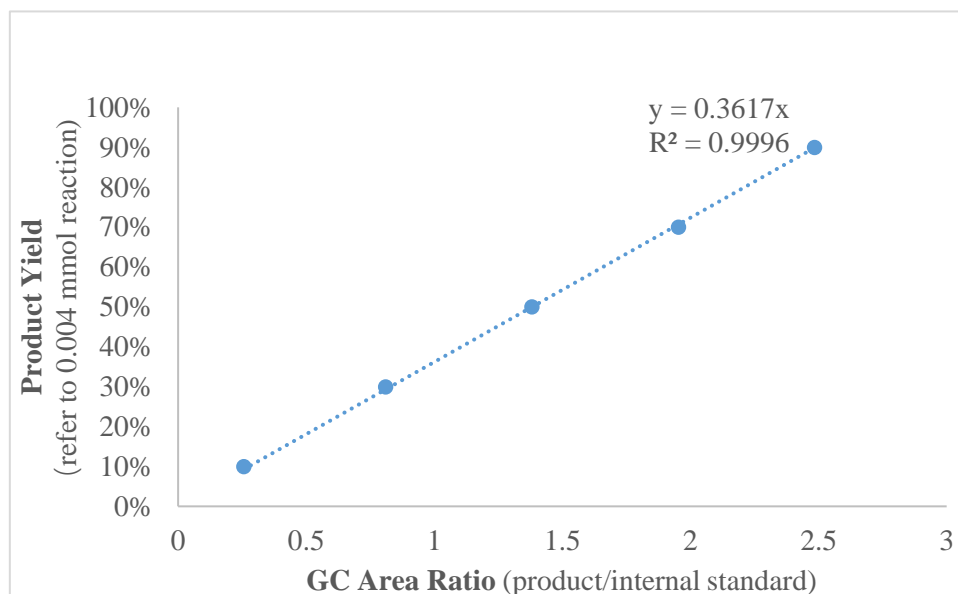

**Enantiomeric excess** was established by HPLC analysis using a Chiralpak AS-H column (HPLC: AS-H, 254 nm, *n*-hexane/isopropanol = 95:5, flow rate 0.5 mL/min, 30 °C,  $t_r$  (major) = 9.88 min,  $t_r$  (minor) = 10.88 min).

### HPLC trace of *rac*-**3f**:

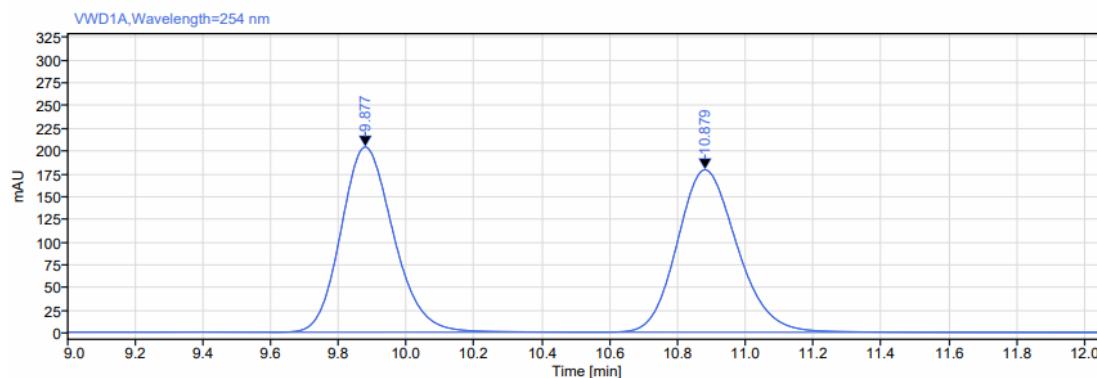

| Signal: VWD1A, Wavelength=254 nm |      |         |        |       |
|----------------------------------|------|---------|--------|-------|
| RT [min]                         | Type | Area    | Height | Area% |
| 9.877                            | BB   | 2185.86 | 203.53 | 49.99 |
| 10.879                           | BB   | 2186.41 | 178.51 | 50.01 |
|                                  | Sum  | 4372.27 |        |       |

### HPLC trace of enantioenriched-**3f** obtained in a 0.004 mmol reaction:

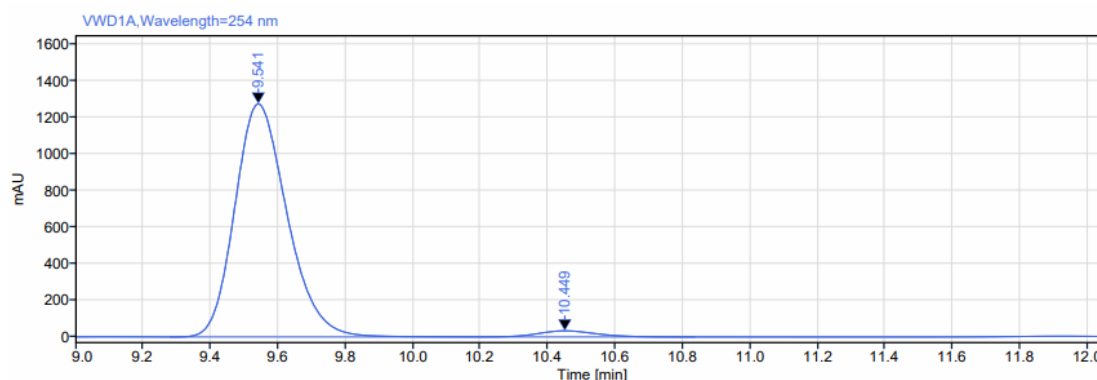

| Signal: VWD1A, Wavelength=254 nm |      |          |         |       |
|----------------------------------|------|----------|---------|-------|
| RT [min]                         | Type | Area     | Height  | Area% |
| 9.541                            | BM m | 13761.25 | 1276.49 | 97.13 |
| 10.449                           | MM m | 406.21   | 33.55   | 2.87  |
|                                  | Sum  | 14167.46 |         |       |

*Rac*-**3f** is a colorless oil (1.11 g, 77%). The NMR spectra of *rac*-**3f** match the one previously reported<sup>32</sup>. <sup>1</sup>H NMR (400 MHz, CDCl<sub>3</sub>)  $\delta$  7.83-7.75 (m, 2H), 7.53-7.46 (m, 2H), 7.33-7.16 (m, 5H), 4.60 (q,  $J$  = 6.8 Hz, 1H), 1.52 (d,  $J$  = 7.2 Hz, 3H).

<sup>13</sup>C NMR (100 MHz, CDCl<sub>3</sub>)  $\delta$  199.2, 141.1, 135.1, 131.8, 130.3, 129.1, 127.9, 127.6, 127.0, 48.1, 19.4.

MS (EI,  $m/z$ ) calcd. for C<sub>15</sub>H<sub>13</sub>BrO [M]<sup>+</sup> 288.0, found: 288.0.

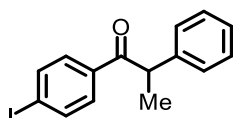

### 1-(4-Iodophenyl)-2-phenylpropan-1-one (**3g**)

By using the typical procedure described in Section 4, the reaction of 4-iodobenzaldehyde **1g** (0.004 mmol) and ethylbenzene **2a** (0.016 mmol) catalysed by RAT<sub>CH</sub> (2 mol%) afforded **3g** in 54% GC yield (average of duplicate runs), with a 94% ee.

GC calibration curve for **3g** is displayed below.

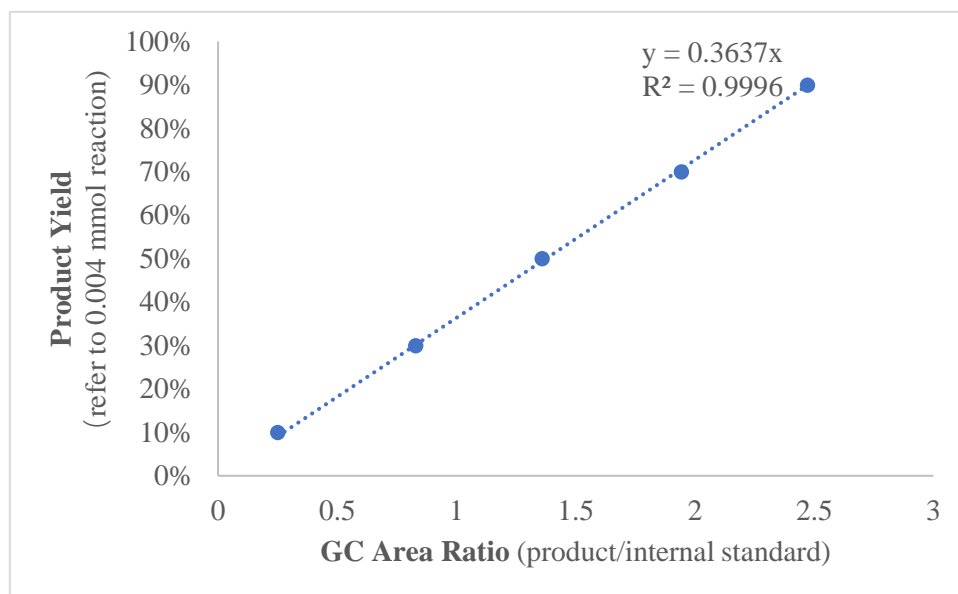

**Enantiomeric excess** was established by HPLC analysis using a Chiralpak AS-H column (HPLC: AS-H, 254 nm, *n*-hexane/isopropanol = 95:5, flow rate 0.5 mL/min, 30 °C,  $t_r$  (major) = 10.29 min,  $t_r$  (minor) = 11.07 min).

HPLC trace of *rac*-**3g**:

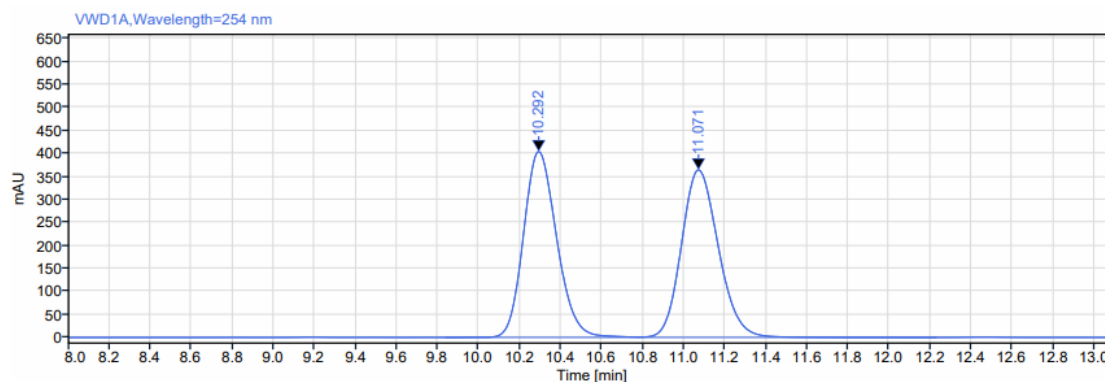

Signal: VWD1A, Wavelength=254 nm

| RT [min] | Type | Area    | Height | Area% |
|----------|------|---------|--------|-------|
| 10.292   | BV   | 4544.01 | 404.60 | 49.89 |
| 11.071   | VB   | 4564.59 | 364.79 | 50.11 |
|          | Sum  | 9108.61 |        |       |

HPLC trace of enantioenriched-**3g** obtained in a 0.004 mmol reaction:

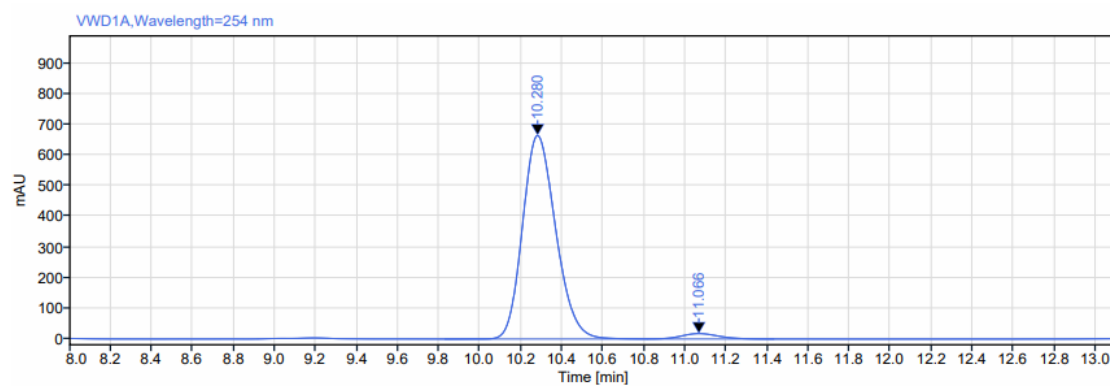

Signal: VWD1A,Wavelength=254 nm

| RT [min] | Type | Area    | Height | Area% |
|----------|------|---------|--------|-------|
| 10.280   | BM m | 7486.52 | 664.11 | 97.06 |
| 11.066   | MM m | 227.08  | 17.84  | 2.94  |
|          | Sum  | 7713.60 |        |       |

The reaction was scaled up to 0.1 mmol, which afforded 16.1 mg **3g**, corresponding to a 48% isolated yield with a 93% ee.

**$^1\text{H}$  NMR (400 MHz,  $\text{CDCl}_3$ ) of enantioenriched-**3g** obtained in a 0.1 mmol reaction:**

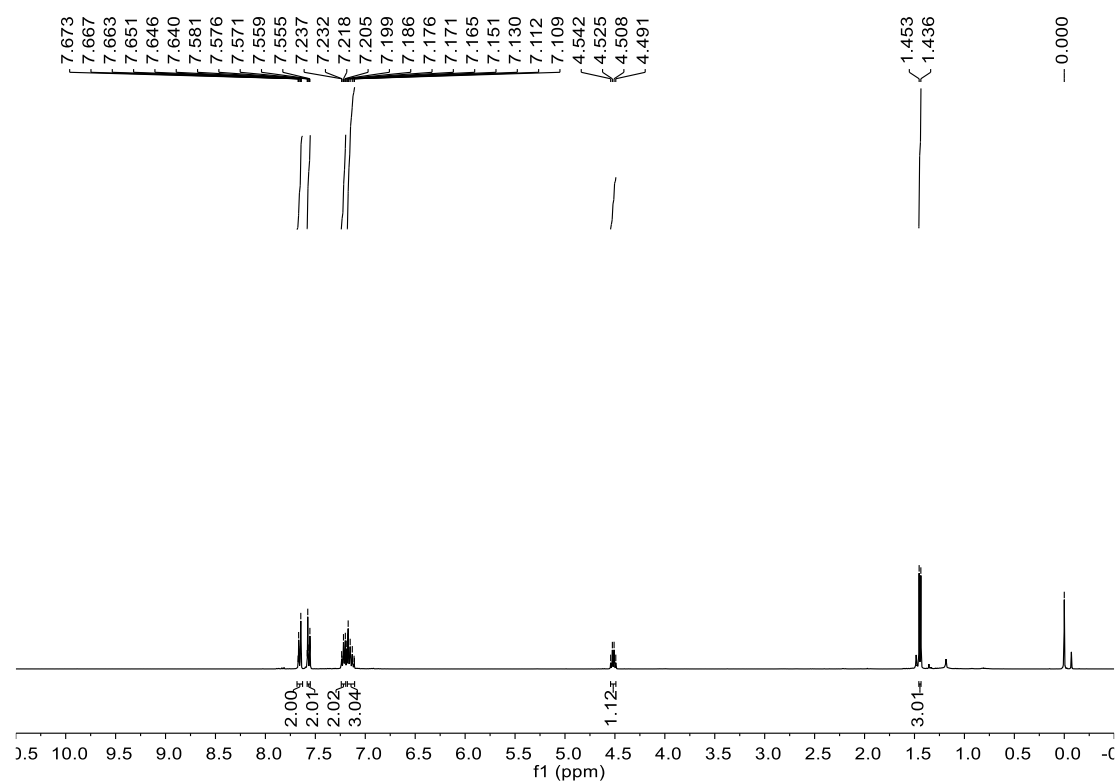

**Enantiomeric excess** was established by HPLC analysis using a Chiralpak AS-H column (HPLC: AS-H, 254 nm, *n*-hexane/isopropanol = 95:5, flow rate 0.5 mL/min, 30 °C,  $t_r$  (major) = 10.07 min,  $t_r$  (minor) = 10.72 min).

**HPLC trace of *rac*-**3g**:**

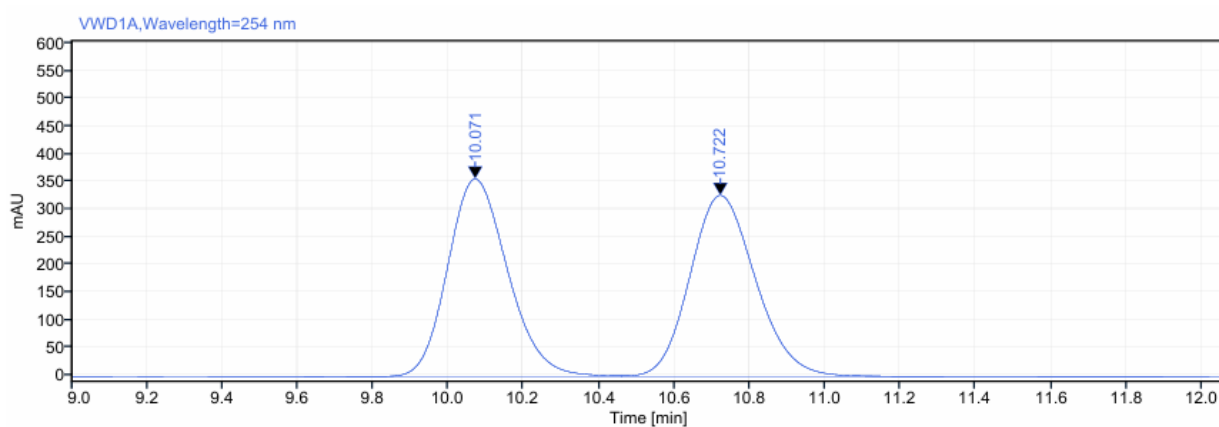

| Signal: VWD1A, Wavelength=254 nm |      |         |        |       |
|----------------------------------|------|---------|--------|-------|
| RT [min]                         | Type | Area    | Height | Area% |
| 10.071                           | BV   | 3974.13 | 357.66 | 49.90 |
| 10.722                           | VB   | 3989.41 | 327.92 | 50.10 |
|                                  | Sum  | 7963.54 |        |       |

**HPLC trace of **3g** obtained in a 0.1 mmol reaction:**

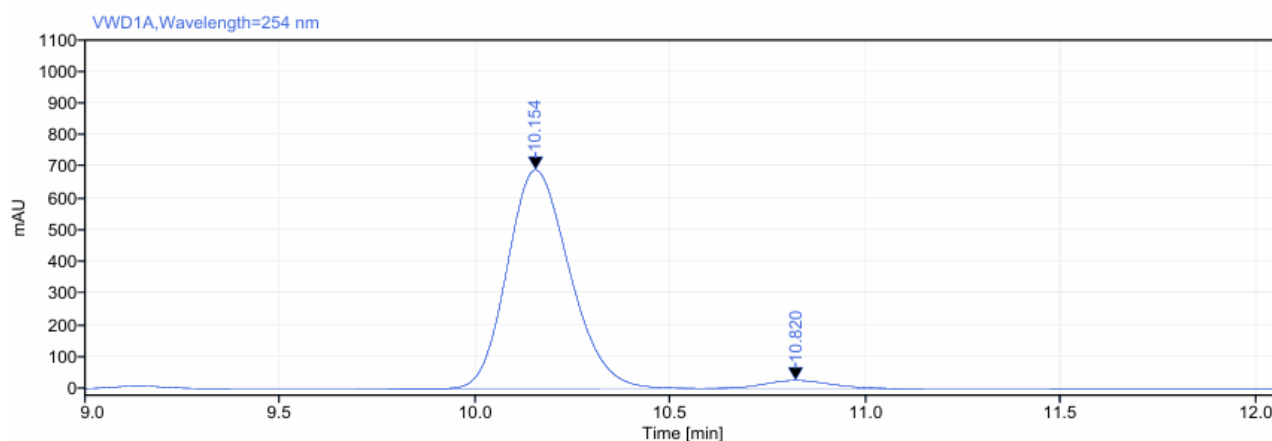

Signal: VWD1A,Wavelength=254 nm

| RT [min] | Type | Area    | Height | Area% |
|----------|------|---------|--------|-------|
| 10.154   | BM m | 7631.10 | 689.80 | 96.35 |
| 10.820   | MM m | 289.41  | 25.09  | 3.65  |
|          | Sum  | 7920.51 |        |       |

*Rac-3g* is a white solid (424 mg, 84%). The NMR spectra of *rac-3g* match the one previously reported<sup>1</sup>.

<sup>1</sup>H NMR (400 MHz, CDCl<sub>3</sub>)  $\delta$  7.76-7.69 (m, 2H), 7.67-7.60 (m, 2H), 7.33-7.25 (m, 2H), 7.25-7.16 (m, 3H), 4.59 (q,  $J$  = 6.8 Hz, 1H), 1.51 (d,  $J$  = 6.8 Hz, 3H).

<sup>13</sup>C NMR (100 MHz, CDCl<sub>3</sub>)  $\delta$  199.5, 141.1, 137.8, 135.7, 130.2, 129.1, 127.6, 127.0, 100.7, 48.0, 19.4.

MS (EI,  $m/z$ ) calcd. for C<sub>15</sub>H<sub>13</sub>IO [M]<sup>+</sup> 336.0, found: 336.0.

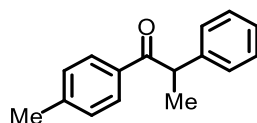

### 2-Phenyl-1-(*p*-tolyl)propan-1-one (**3h**)

By using the typical procedure described in Section 4, the reaction of 4-methylbenzaldehyde **1h** (0.004 mmol) and ethylbenzene **2a** (0.016 mmol) catalysed by **RAT<sub>CH</sub>** (2 mol%) afforded **3h** in 48% GC yield (average of duplicate runs), with a 95% ee.

GC calibration curve for **3h** is displayed below.

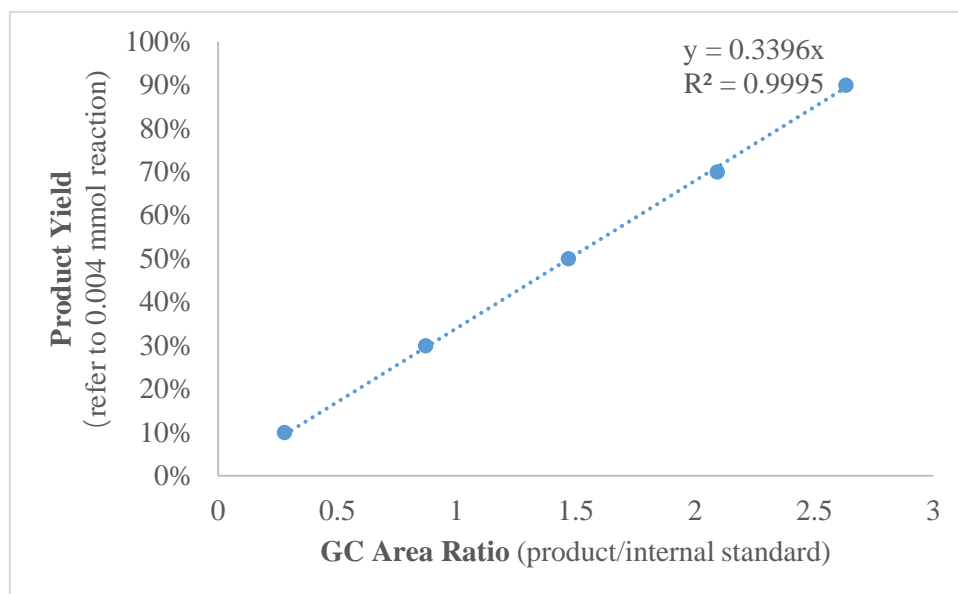

**Enantiomeric excess** was established by HPLC analysis using a Chiralpak AS-H column (HPLC: AS-H, 254 nm, *n*-hexane/isopropanol = 95:5, flow rate 0.5 mL/min, 30 °C,  $t_r$  (major) = 9.28 min,  $t_r$  (minor) = 10.44 min).

HPLC trace of *rac*-**3h**:

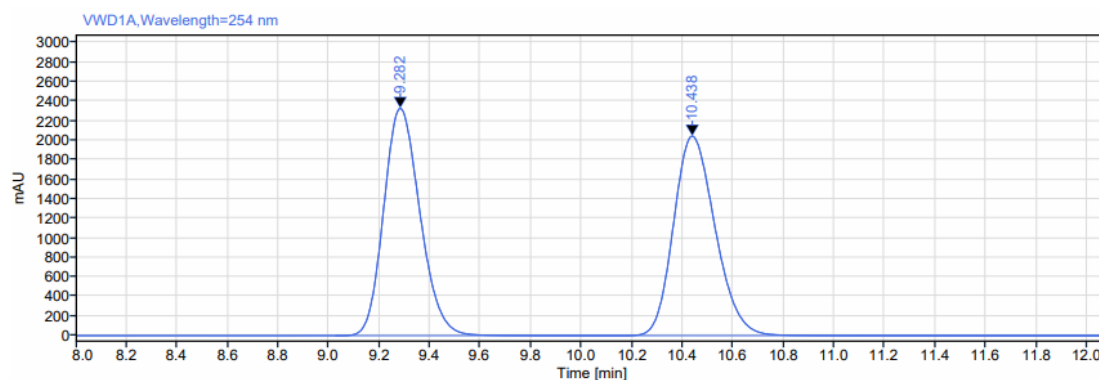

Signal: VWD1A, Wavelength=254 nm

| RT [min] | Type | Area     | Height  | Area% |
|----------|------|----------|---------|-------|
| 9.282    | VB   | 23262.79 | 2329.87 | 49.88 |
| 10.438   | BB   | 23371.18 | 2044.62 | 50.12 |
| Sum      |      | 46633.97 |         |       |

HPLC trace of enantioenriched-**3h** obtained in a 0.004 mmol reaction:

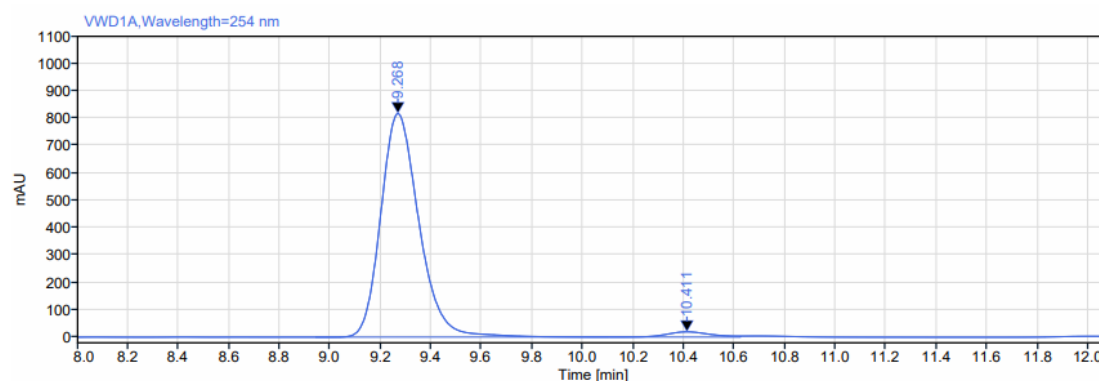



Signal: VWD1A,Wavelength=254 nm

| RT [min] | Type | Area    | Height | Area% |
|----------|------|---------|--------|-------|
| 9.268    | BB   | 8569.41 | 817.16 | 97.40 |
| 10.411   | BV   | 228.82  | 19.11  | 2.60  |
|          | Sum  | 8798.23 |        |       |

*Rac-3h* is a colorless oil (195 mg, 87%). The NMR spectra of *rac-3h* match the one previously reported<sup>28</sup>.

**<sup>1</sup>H NMR (400 MHz, CDCl<sub>3</sub>)**  $\delta$  7.88-7.82 (m, 2H), 7.30-7.24 (m, 4H), 7.21-7.12 (m, 3H), 4.66 (q,  $J$  = 6.8 Hz, 1H), 2.32 (s, 3H), 1.52 (d,  $J$  = 6.8 Hz, 3H).

**<sup>13</sup>C NMR (100 MHz, CDCl<sub>3</sub>)**  $\delta$  199.9, 143.5, 141.7, 133.9, 129.1, 128.9, 128.8, 127.7, 126.7, 47.7, 21.5, 19.4.

**MS** (EI,  $m/z$ ) calcd. for C<sub>16</sub>H<sub>16</sub>O [M]<sup>+</sup> 224.1, found: 224.1.

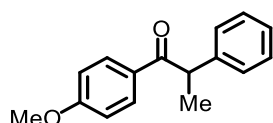

### 1-(4-Methoxyphenyl)-2-phenylpropan-1-one (**3i**)

By using the typical procedure described in Section 4, the reaction of 4-methoxybenzaldehyde **1i** (0.004 mmol) and ethylbenzene **2a** (0.016 mmol) catalysed by **RAT<sub>CH</sub>** (2 mol%) afforded **3i** in 40% **GC yield** (average of duplicate runs), with a 96% ee.

GC calibration curve for **3i** is displayed below.

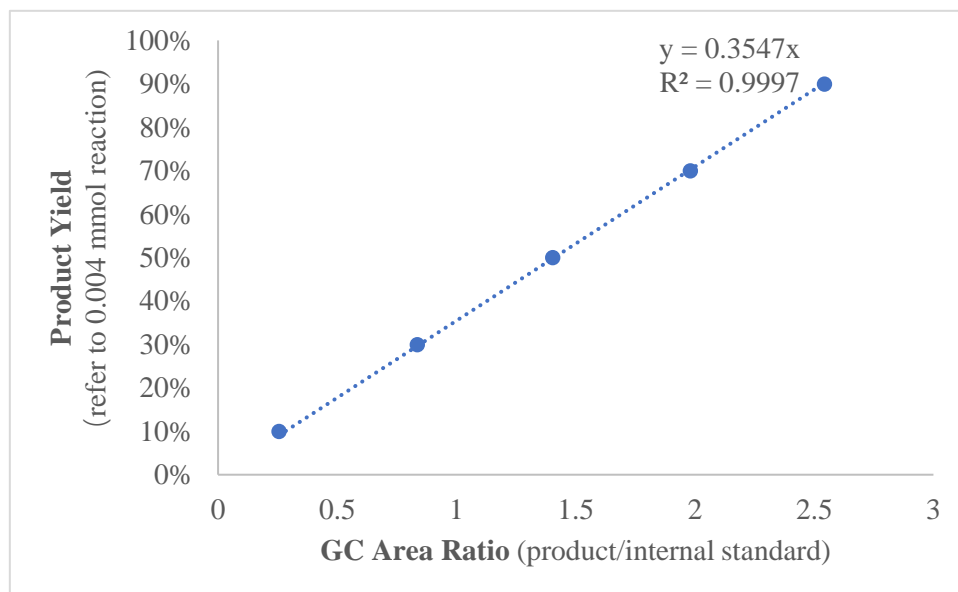

**Enantiomeric excess** was established by HPLC analysis using a Chiralpak AS-H column (HPLC: AS-H, 254 nm, *n*-hexane/isopropanol = 95:5, flow rate 0.5 mL/min, 30 °C,  $t_r$  (major) = 14.99 min,  $t_r$  (minor) = 16.61 min).

### HPLC trace of *rac*-**3i**:

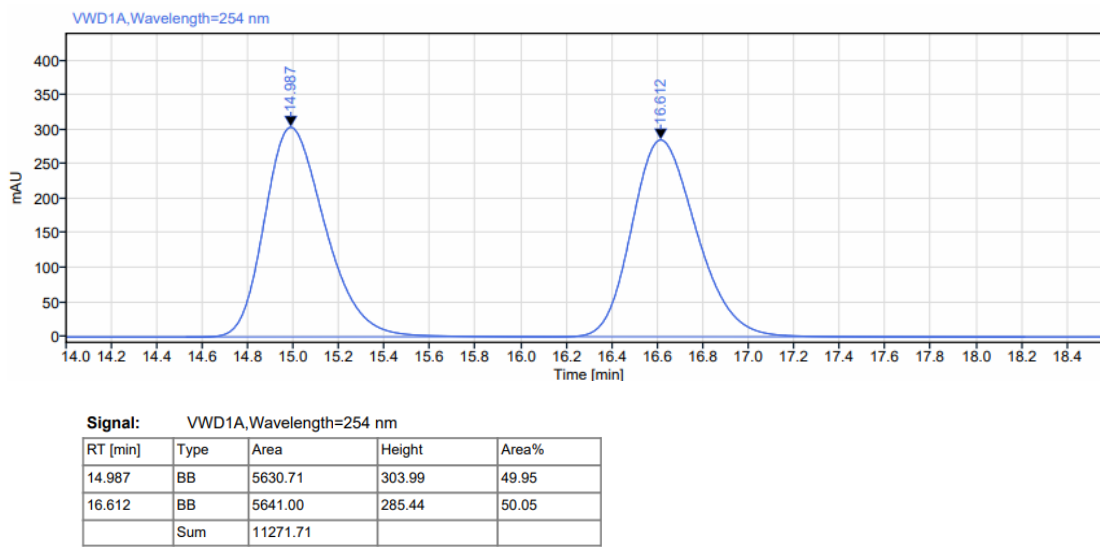

### HPLC trace of enantioenriched-**3i** obtained in a 0.004 mmol reaction:

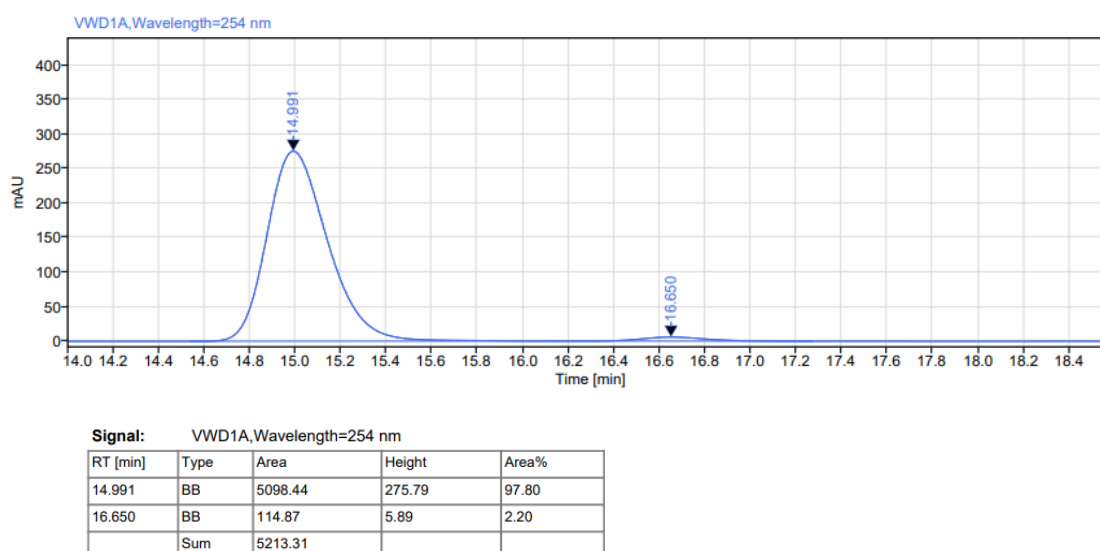

*Rac*-**3i** is a colorless oil (178 mg, 78%). The NMR spectra of *rac*-**3i** match the one previously reported<sup>28</sup>.

**<sup>1</sup>H NMR (400 MHz, CDCl<sub>3</sub>)**  $\delta$  7.98-7.90 (m, 2H), 7.31-7.25 (m, 4H), 7.23-7.14 (m, 1H), 6.89-6.81 (m, 2H), 4.64 (q,  $J$  = 6.9 Hz, 1H), 3.80 (s, 3H), 1.51 (d,  $J$  = 6.8 Hz, 3H).

**<sup>13</sup>C NMR (100 MHz, CDCl<sub>3</sub>)**  $\delta$  198.8, 163.2, 141.9, 131.0, 129.4, 128.9, 127.7, 126.7, 113.6, 55.4, 47.5, 19.5.

**MS** (EI,  $m/z$ ) calcd. for C<sub>16</sub>H<sub>16</sub>O<sub>2</sub> [M]<sup>+</sup> 240.1, found: 240.1.

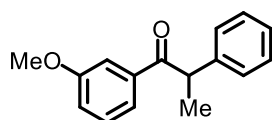

### 1-(3-Methoxyphenyl)-2-phenylpropan-1-one (**3j**)

By using the typical procedure described in Section 4, the reaction of 3-methoxybenzaldehyde **1j** (0.004 mmol) and ethylbenzene **2a** (0.016 mmol) catalysed by **RAT<sub>CH</sub>** (2 mol%) afforded **3j** in 51%

**GC yield** (average of duplicate runs), with a 78% ee.

GC calibration curve for **3j** is displayed below.

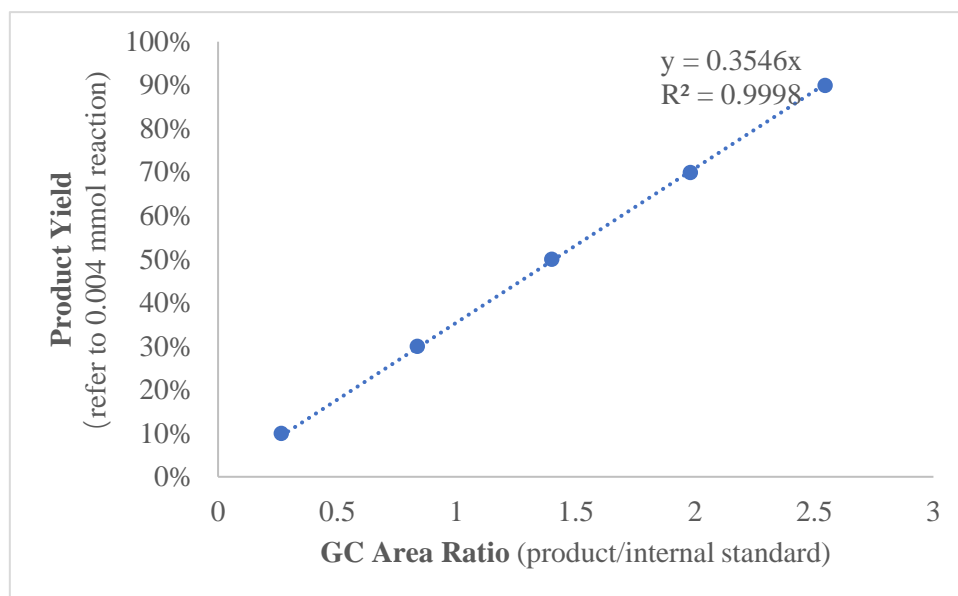

**Enantiomeric excess** was established by HPLC analysis using a Chiralpak AS-H column (HPLC: AS-H, 254 nm, *n*-hexane/isopropanol = 95:5, flow rate 0.5 mL/min, 30 °C,  $t_r$  (major) = 10.75 min,  $t_r$  (minor) = 12.93 min).

HPLC trace of *rac*-**3j**:

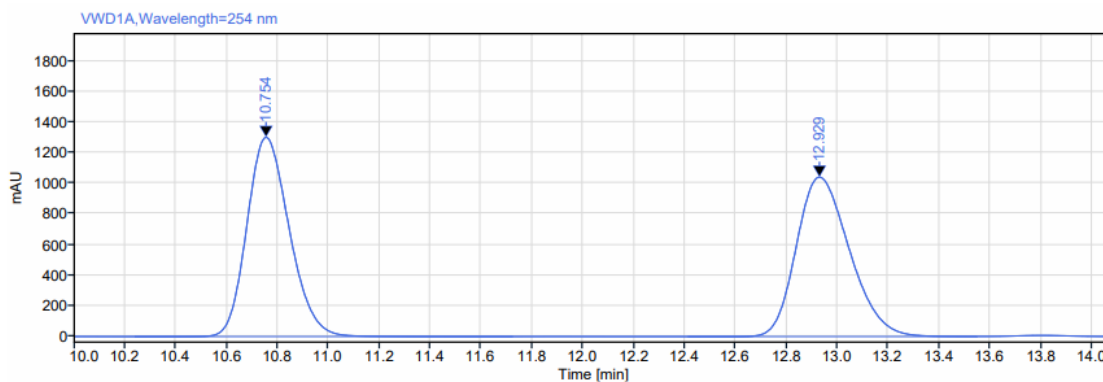

Signal: VWD1A, Wavelength=254 nm

| RT [min] | Type | Area     | Height  | Area% |
|----------|------|----------|---------|-------|
| 10.754   | BB   | 15070.98 | 1302.36 | 49.89 |
| 12.929   | BV   | 15140.30 | 1042.15 | 50.11 |
|          | Sum  | 30211.28 |         |       |

HPLC trace of enantioenriched-**3j** obtained in a 0.004 mmol reaction:

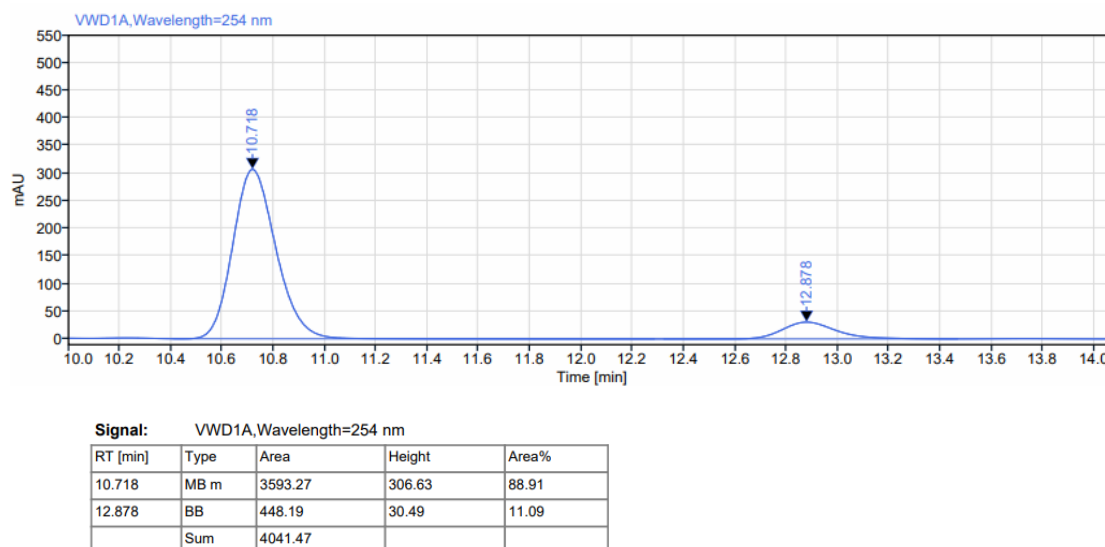

*Rac-3j* is a colorless oil (164 mg, 68%). The NMR spectra of *rac-3j* match the one previously reported<sup>33</sup>.

**<sup>1</sup>H NMR (400 MHz, CDCl<sub>3</sub>)**  $\delta$  7.56-7.49 (m, 1H), 7.51-7.45 (m, 1H), 7.31-7.24 (m, 5H), 7.23-7.15 (m, 1H), 7.04-6.97 (m, 1H), 4.66 (q,  $J$  = 6.8 Hz, 1H), 3.78 (s, 3H), 1.53 (d,  $J$  = 6.9 Hz, 3H).

**<sup>13</sup>C NMR (100 MHz, CDCl<sub>3</sub>)**  $\delta$  200.1, 159.7, 141.5, 137.8, 129.4, 128.9, 127.7, 126.9, 121.3, 119.2, 113.1, 55.3, 48.0, 19.5.

**MS** (EI,  $m/z$ ) calcd. for C<sub>16</sub>H<sub>16</sub>O<sub>2</sub> [M]<sup>+</sup> 240.1, found: 240.1.

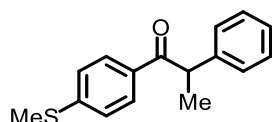

**1-(4-(Methylthio)phenyl)-2-phenylpropan-1-one (**3k**)**

By using the typical procedure described in Section 4, the reaction of 4-(methylthio)benzaldehyde **1k** (0.004 mmol) and ethylbenzene **2a** (0.016 mmol) catalysed by **RAT<sub>CH</sub>** (2 mol%) afforded **3k** in 47% **GC yield** (average of duplicate runs), with a 97% ee.

GC calibration curve for **3k** is displayed below.

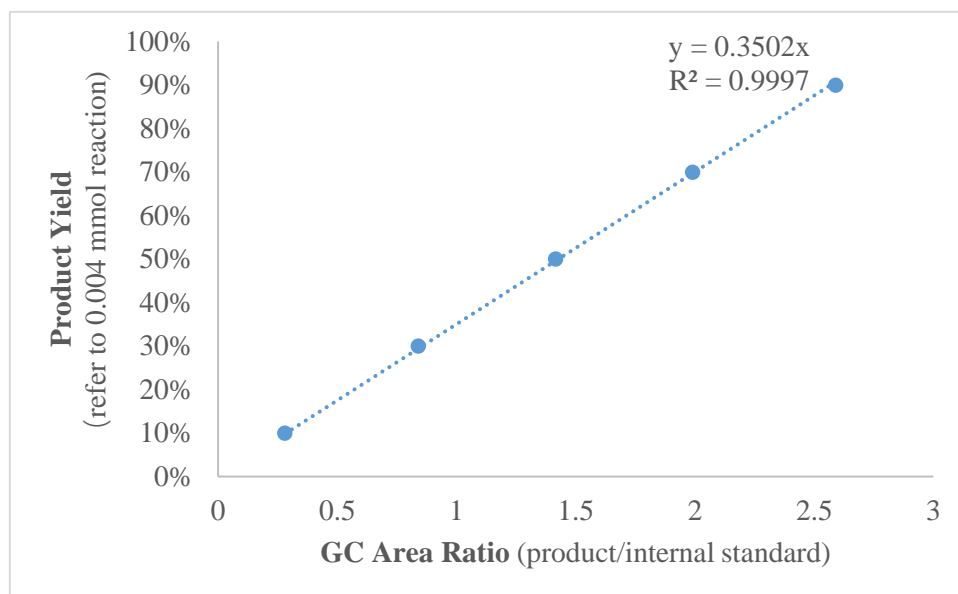

**Enantiomeric excess** was established by HPLC analysis using a Chiralpak AS-H column (HPLC: AS-H, 254 nm, *n*-hexane/isopropanol = 95:5, flow rate 0.5 mL/min, 30 °C,  $t_r$  (major) = 15.25 min,  $t_r$  (minor) = 16.18 min).

HPLC trace of *rac*-**3k**:

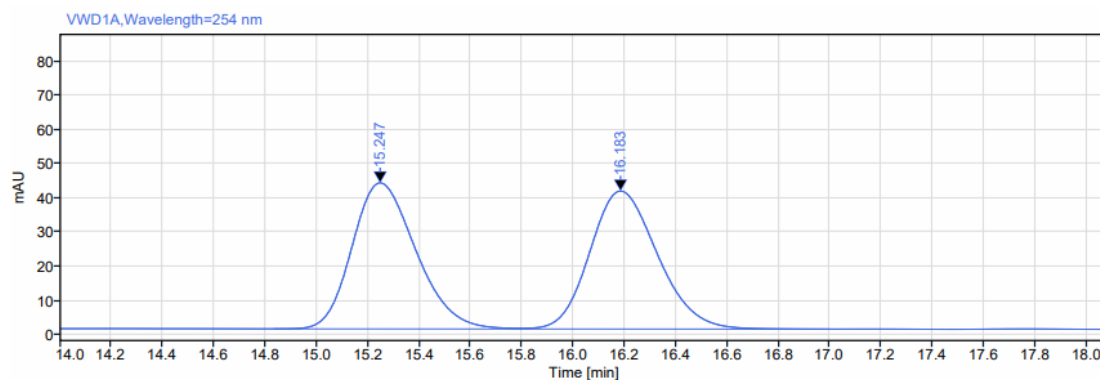

Signal: VWD1A,Wavelength=254 nm

| RT [min] | Type | Area    | Height | Area% |
|----------|------|---------|--------|-------|
| 15.247   | BV   | 739.16  | 42.75  | 49.93 |
| 16.183   | VB   | 741.11  | 40.39  | 50.07 |
|          | Sum  | 1480.27 |        |       |

HPLC trace of enantioenriched-**3k** obtained in a 0.004 mmol reaction:

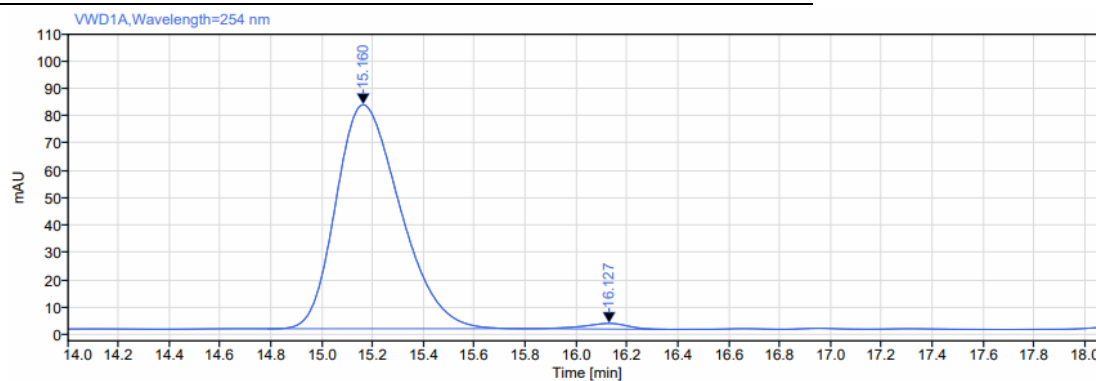



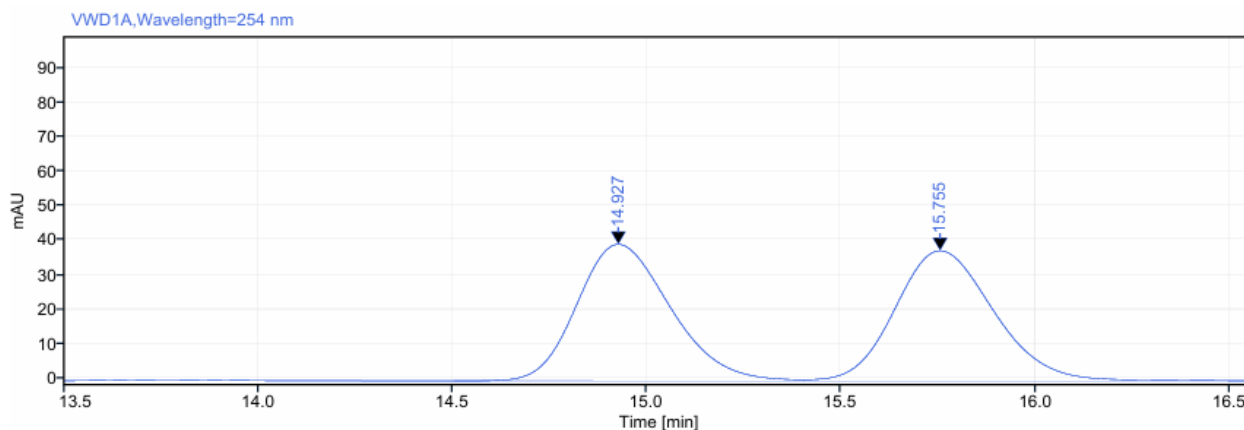

Signal: VWD1A,Wavelength=254 nm

| RT [min] | Type | Area    | Height | Area% |
|----------|------|---------|--------|-------|
| 14.927   | BV   | 662.01  | 39.59  | 49.77 |
| 15.755   | VB   | 668.07  | 37.76  | 50.23 |
|          | Sum  | 1330.08 |        |       |

HPLC trace of **3k** obtained in a 0.1 mmol reaction:

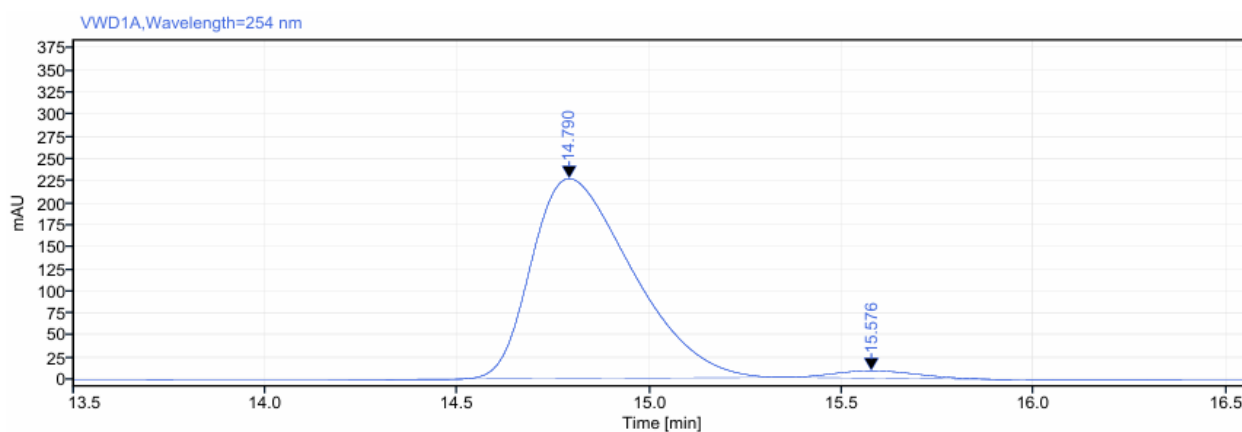

Signal: VWD1A,Wavelength=254 nm

| RT [min] | Type | Area    | Height | Area% |
|----------|------|---------|--------|-------|
| 14.790   | BM m | 4104.22 | 226.42 | 97.03 |
| 15.576   | MM m | 125.52  | 8.29   | 2.97  |
|          | Sum  | 4229.73 |        |       |

*Rac-3k* is a white solid (101 mg, 66%). The NMR spectra of *rac-3k* match the one previously reported<sup>34</sup>.

<sup>1</sup>H NMR (400 MHz, CDCl<sub>3</sub>)  $\delta$  7.90-7.82 (m, 2H), 7.32-7.23 (m, 4H), 7.23-7.14 (m, 3H), 4.62 (q,  $J$  = 6.8 Hz, 1H), 2.46 (s, 3H), 1.52 (d,  $J$  = 6.8 Hz, 3H).

<sup>13</sup>C NMR (100 MHz, CDCl<sub>3</sub>)  $\delta$  199.2, 145.5, 141.6, 132.7, 129.2, 129.0, 127.7, 126.8, 124.9, 47.7, 19.5, 14.7.

MS (EI,  $m/z$ ) calcd. for C<sub>16</sub>H<sub>16</sub>OS [M]<sup>+</sup> 256.1, found: 256.1.

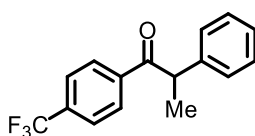

### 2-Phenyl-1-(4-(trifluoromethyl)phenyl)propan-1-one (**3l**)

By using the typical procedure described in Section 4, the reaction of 4-

(trifluoromethyl)benzaldehyde **1l** (0.004 mmol) and ethylbenzene **2a** (0.016 mmol) catalysed by **RAT<sub>CH</sub>** (2 mol%) afforded **3l** in 47% **GC yield** (average of duplicate runs), with a 83% ee.

GC calibration curve for **3l** is displayed below.

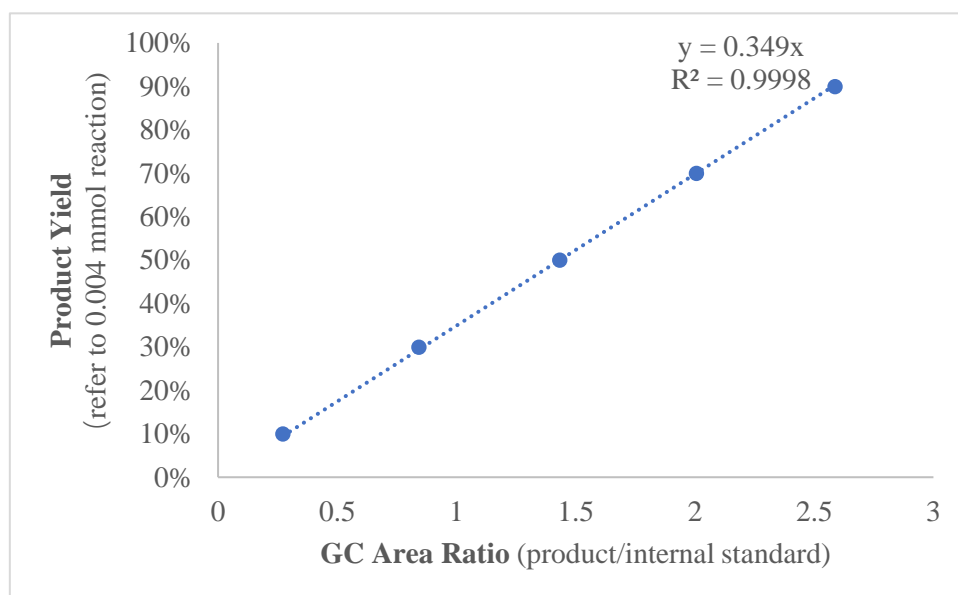

**Enantiomeric excess** was established by HPLC analysis using a Chiralpak AS-H column (HPLC: AS-H, 254 nm, *n*-hexane/isopropanol = 95:5, flow rate 0.5 mL/min, 30 °C, *t<sub>r</sub>* (major) = 7.78 min, *t<sub>r</sub>* (minor) = 8.27 min).

HPLC trace of *rac*-**3l**:

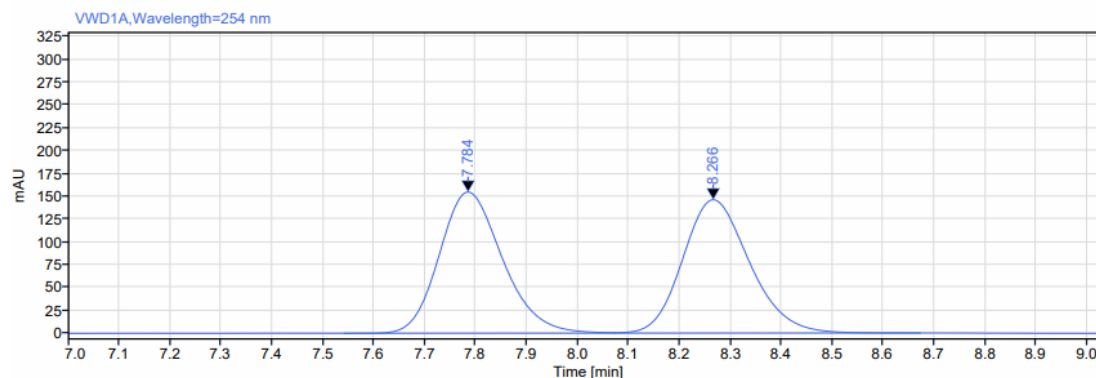

**Signal:** VWD1A,Wavelength=254 nm

| RT [min] | Type | Area    | Height | Area% |
|----------|------|---------|--------|-------|
| 7.784    | BM m | 1336.45 | 154.88 | 50.05 |
| 8.266    | MM m | 1333.57 | 146.27 | 49.95 |
|          | Sum  | 2670.02 |        |       |



HPLC trace of enantioenriched-**3l** obtained in a 0.004 mmol reaction:

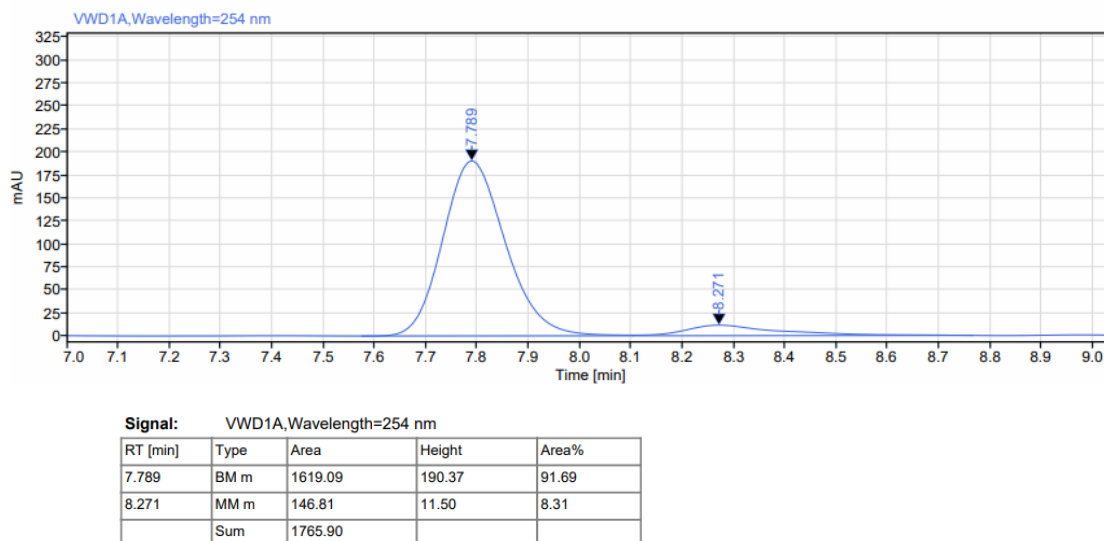

*Rac*-**3l** is a colorless oil (248 mg, 81%). The NMR spectra of *rac*-**3l** match the one previously reported<sup>35</sup>.

**<sup>1</sup>H NMR (400 MHz, CDCl<sub>3</sub>)**  $\delta$  8.02 (d,  $J$  = 8.1 Hz, 2H), 7.62 (d,  $J$  = 8.2 Hz, 2H), 7.34-7.17 (m, 5H), 4.65 (q,  $J$  = 6.8 Hz, 1H), 1.55 (d,  $J$  = 6.8 Hz, 3H).

**<sup>13</sup>C NMR (100 MHz, CDCl<sub>3</sub>)**  $\delta$  199.2, 140.8, 139.2, 134.0 (q,  $J$  = 32.4 Hz), 129.2, 129.0, 127.7, 127.2, 125.5 (q,  $J$  = 3.7 Hz), 123.5 (q,  $J$  = 270.9 Hz), 48.5, 19.3.

**MS** (EI,  $m/z$ ) calcd. for C<sub>16</sub>H<sub>13</sub>F<sub>3</sub>O [M]<sup>+</sup> 278.1, found: 278.1.

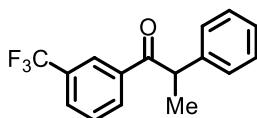

**2-Phenyl-1-(3-(trifluoromethyl)phenyl)propan-1-one (**3m**)**

By using the typical procedure described in Section 4, the reaction of 3-(trifluoromethyl)benzaldehyde **1m** (0.004 mmol) and ethylbenzene **2a** (0.016 mmol) catalysed by **RAT<sub>CH</sub>** (2 mol%) afforded **3m** in 65% **GC yield** (average of duplicate runs), with a 71% ee.

GC calibration curve for **3m** is displayed below.

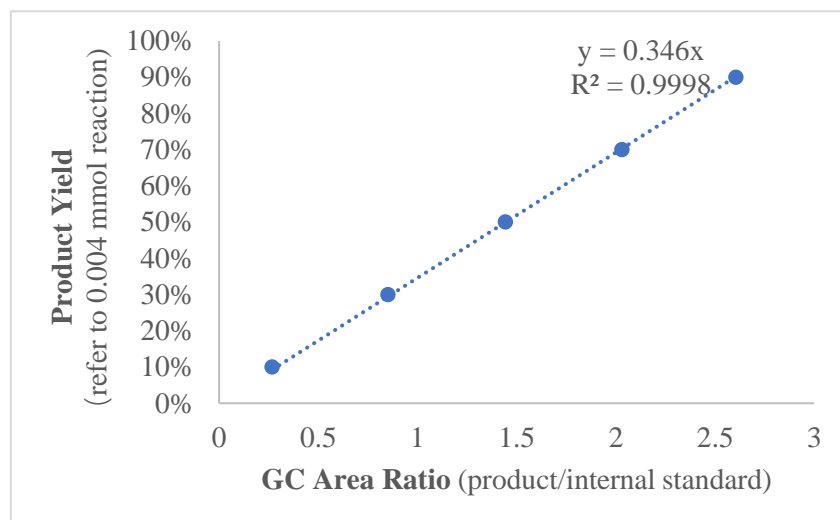

**Enantiomeric excess** was established by HPLC analysis using a Chiralpak AS-H column (HPLC: AS-H, 254 nm, *n*-hexane/isopropanol = 95:5, flow rate 0.5 mL/min, 30 °C,  $t_r$  (major) = 7.69 min,  $t_r$  (minor) = 8.19 min).

HPLC trace of *rac*-**3m**:

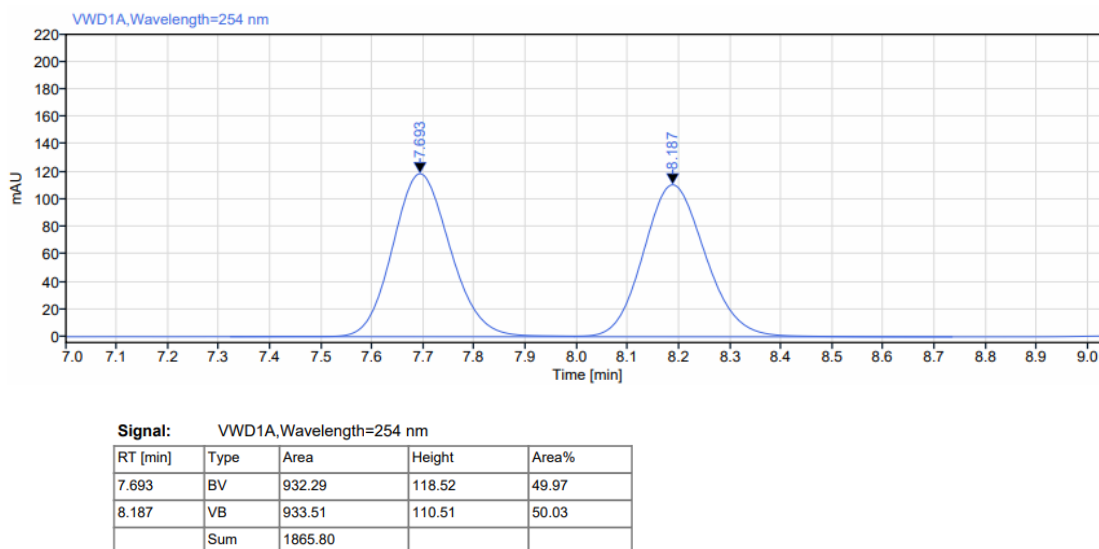

HPLC trace of enantioenriched-**3m** obtained in a 0.004 mmol reaction:

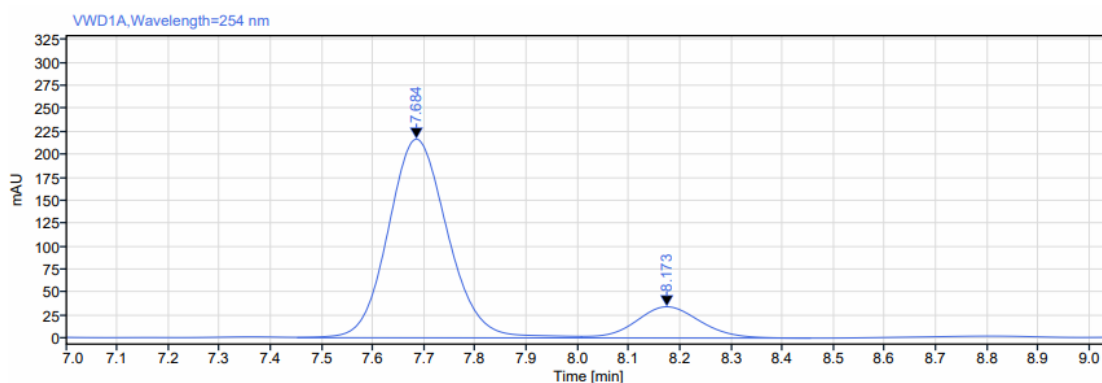

Signal: VWD1A,Wavelength=254 nm

| RT [min] | Type | Area    | Height | Area% |
|----------|------|---------|--------|-------|
| 7.684    | VV   | 1744.50 | 216.47 | 85.45 |
| 8.173    | VB   | 297.06  | 34.05  | 14.55 |
|          | Sum  | 2041.56 |        |       |

*Rac-3m* is a colorless oil (170 mg, 61%). The NMR spectra of *rac-3m* match the one previously reported<sup>36</sup>.

**<sup>1</sup>H NMR (400 MHz, CDCl<sub>3</sub>)**  $\delta$  8.22 (s, 1H), 8.09 (d,  $J$  = 7.9 Hz, 1H), 7.70 (d,  $J$  = 7.8 Hz, 1H), 7.49 (t,  $J$  = 7.8 Hz, 1H), 7.34-7.23 (m, 4H), 7.25-7.16 (m, 1H), 4.66 (q,  $J$  = 6.8 Hz, 1H), 1.55 (d,  $J$  = 6.8 Hz, 3H).

**<sup>13</sup>C NMR (100 MHz, CDCl<sub>3</sub>)**  $\delta$  198.8, 140.7, 136.9, 131.9 (q,  $J$  = 0.6 Hz), 131.1 (q,  $J$  = 32.5 Hz), 129.2, 129.11 (q,  $J$  = 3.7 Hz), 129.09, 127.7, 127.2, 125.6 (q,  $J$  = 3.9 Hz), 123.6 (q,  $J$  = 270.8 Hz), 48.3, 19.3.

**MS** (EI,  $m/z$ ) calcd. for C<sub>16</sub>H<sub>13</sub>F<sub>3</sub>O [M]<sup>+</sup> 278.1, found: 278.1.

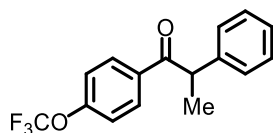

### 2-Phenyl-1-(4-(trifluoromethoxy)phenyl)propan-1-one (**3n**)

By using the typical procedure described in Section 4, the reaction of 4-(trifluoromethoxy)benzaldehyde **1n** (0.004 mmol) and ethylbenzene **2a** (0.016 mmol) catalysed by **RAT<sub>CH</sub>** (2 mol%) afforded **3n** in 48% **GC yield** (average of duplicate runs), with a 90% ee.

GC calibration curve for **3n** is displayed below.

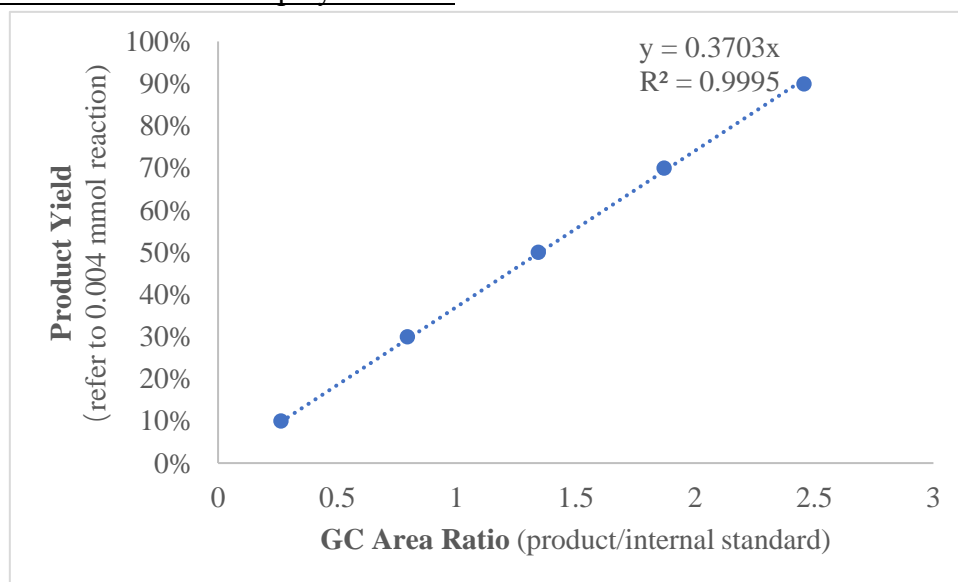

**Enantiomeric excess** was established by HPLC analysis using a Chiralpak AS-H column (HPLC: AS-H, 254 nm, *n*-hexane/isopropanol = 95:5, flow rate 0.5 mL/min, 30 °C,  $t_r$  (major) = 7.38 min,  $t_r$  (minor) = 7.70 min).

### HPLC trace of *rac*-**3n**:

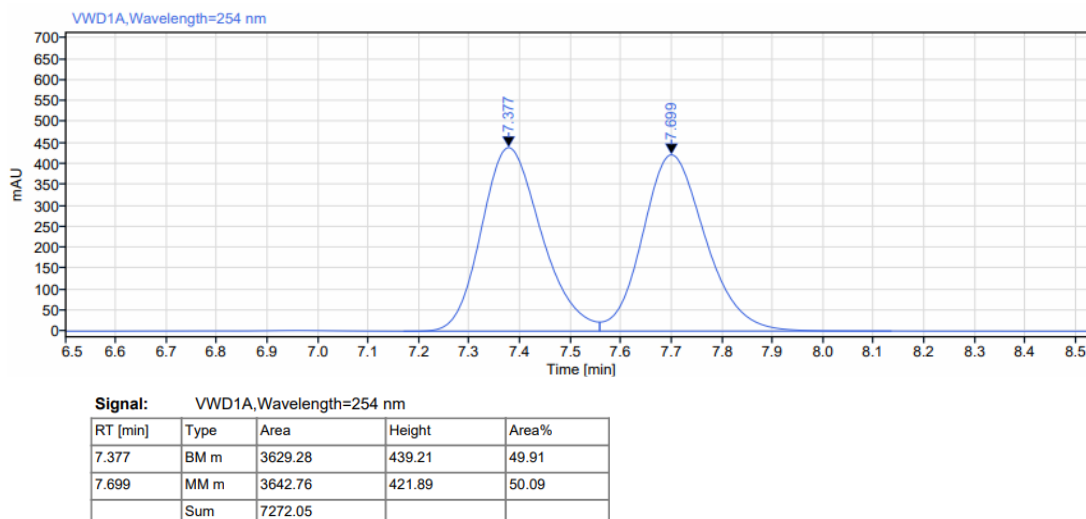

### HPLC trace of enantioenriched-**3n** obtained in a 0.004 mmol reaction:

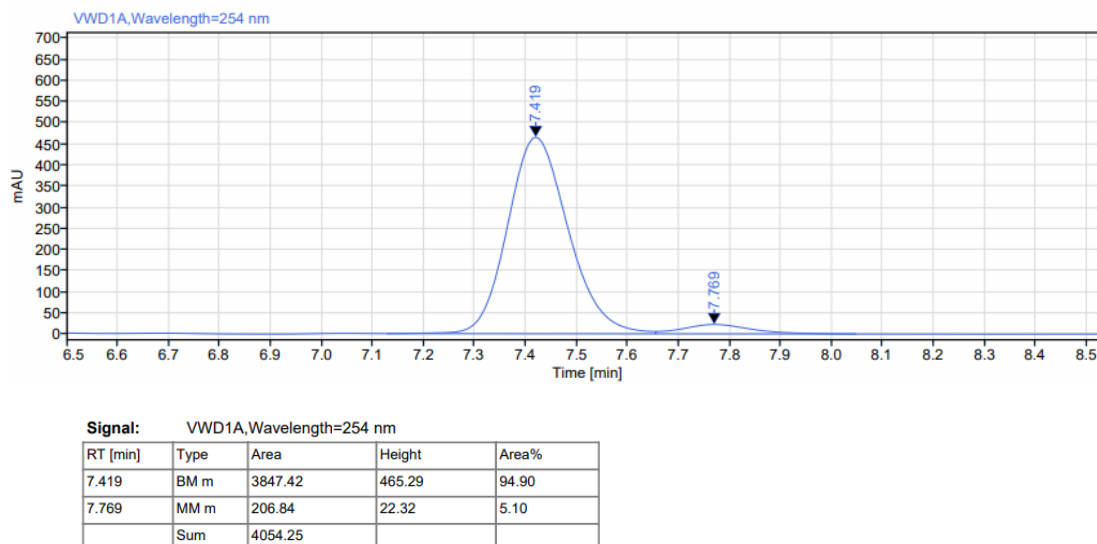

*Rac*-**3n** is a colorless oil (217 mg, 86%). The NMR spectra of *rac*-**3n** match the one previously reported<sup>1</sup>.

<sup>1</sup>H NMR (400 MHz, CDCl<sub>3</sub>)  $\delta$  8.03-7.95 (m, 2H), 7.34-7.23 (m, 4H), 7.25-7.16 (m, 3H), 4.62 (q,  $J$  = 6.8 Hz, 1H), 1.53 (d,  $J$  = 6.8 Hz, 3H).

<sup>13</sup>C NMR (100 MHz, CDCl<sub>3</sub>)  $\delta$  198.6, 152.3, 141.1, 134.6, 130.8, 129.1, 127.7, 127.1, 120.19, 120.22 (q,  $J$  = 257.2 Hz), 48.2, 19.4.

MS (EI,  $m/z$ ) calcd. for C<sub>16</sub>H<sub>13</sub>F<sub>3</sub>O<sub>2</sub> [M]<sup>+</sup> 294.1, found: 294.1.

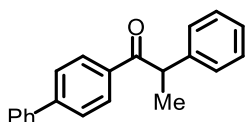

### 1-([1,1'-Biphenyl]-4-yl)-2-phenylpropan-1-one (**3o**)

By using the typical procedure described in Section 4, the reaction of [1,1'-biphenyl]-4-carbaldehyde **1o** (0.004 mmol) and ethylbenzene **2a** (0.016 mmol) catalysed by RAT<sub>CH</sub> (2 mol%) afforded **3o** in 38% GC yield (average of duplicate runs), with a 97% ee.

GC calibration curve for **3o** is displayed below.

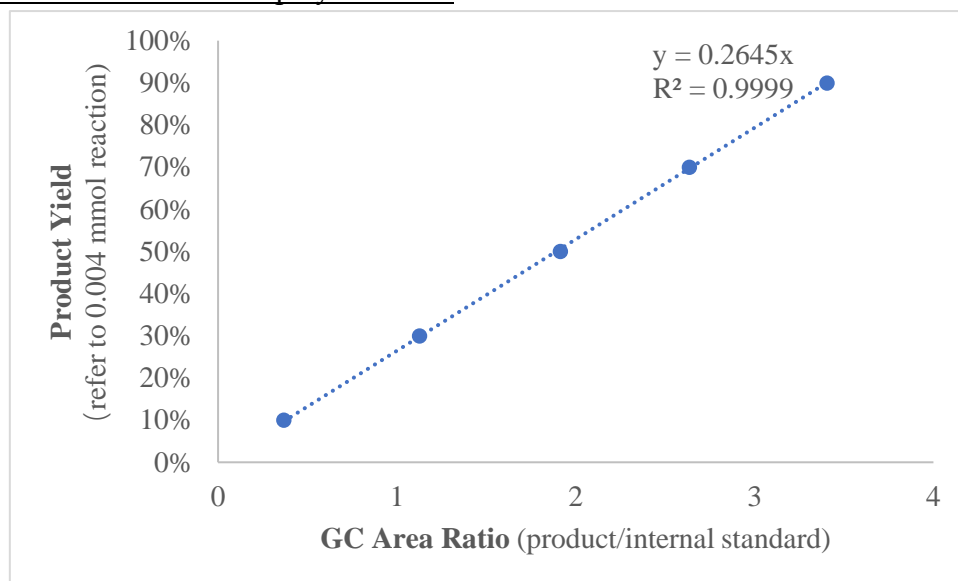

**Enantiomeric excess** was established by HPLC analysis using a Chiralpak AS-H column (HPLC: AS-H, 254 nm, *n*-hexane/isopropanol = 95:5, flow rate 0.5 mL/min, 30 °C,  $t_r$  (major) = 24.34 min,  $t_r$  (minor) = 22.13 min).

HPLC trace of *rac*-**3o**:

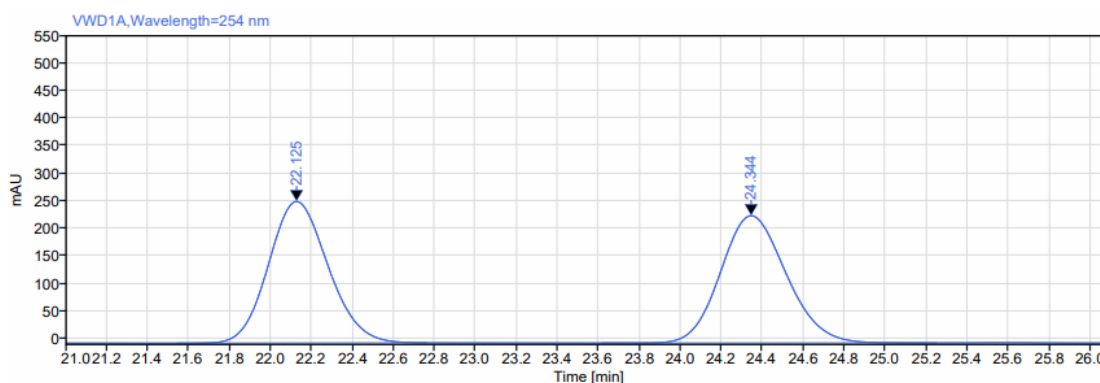

Signal: VWD1A, Wavelength=254 nm

| RT [min] | Type | Area     | Height | Area% |
|----------|------|----------|--------|-------|
| 22.125   | BM m | 5188.25  | 256.74 | 50.20 |
| 24.344   | BB   | 5146.18  | 230.89 | 49.80 |
|          | Sum  | 10334.43 |        |       |

HPLC trace of enantioenriched-**3o** obtained in a 0.004 mmol reaction:

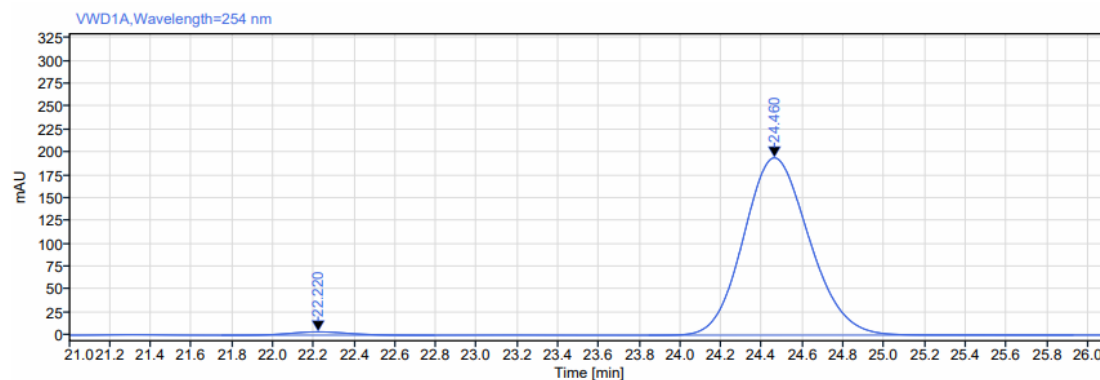

Signal: VWD1A, Wavelength=254 nm

| RT [min] | Type | Area    | Height | Area% |
|----------|------|---------|--------|-------|
| 22.220   | BB   | 74.45   | 3.69   | 1.68  |
| 24.460   | BB   | 4354.86 | 194.16 | 98.32 |
|          | Sum  | 4429.31 |        |       |

*Rac*-**3o** is a white solid (316 mg, 84%). The NMR spectra of *rac*-**3o** match the one previously reported<sup>29</sup>.

**<sup>1</sup>H NMR (400 MHz, CDCl<sub>3</sub>)**  $\delta$  8.05-7.99 (m, 2H), 7.63-7.54 (m, 4H), 7.48-7.40 (m, 2H), 7.41-7.32 (m, 1H), 7.35-7.26 (m, 4H), 7.26-7.17 (m, 1H), 4.71 (q,  $J$  = 6.8 Hz, 1H), 1.55 (d,  $J$  = 6.9 Hz, 3H).

**<sup>13</sup>C NMR (100 MHz, CDCl<sub>3</sub>)**  $\delta$  199.8, 145.4, 141.5, 139.8, 135.1, 129.4, 129.0, 128.9, 128.1, 127.8, 127.2, 127.1, 126.9, 47.9, 19.5.

**MS (EI,  $m/z$ )** calcd. for C<sub>21</sub>H<sub>18</sub>O [M]<sup>+</sup> 286.1, found: 286.1.

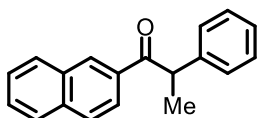

### 1-(Naphthalen-2-yl)-2-phenylpropan-1-one (**3p**)

By using the typical procedure described in Section 4, the reaction of 2-naphthaldehyde **1p** (0.004 mmol) and ethylbenzene **2a** (0.016 mmol) catalysed by **RAT<sub>CH</sub>** (2 mol%) afforded **3p** in 30% **GC yield** (average of duplicate runs), with a 85% ee.

GC calibration curve for **3p** is displayed below.

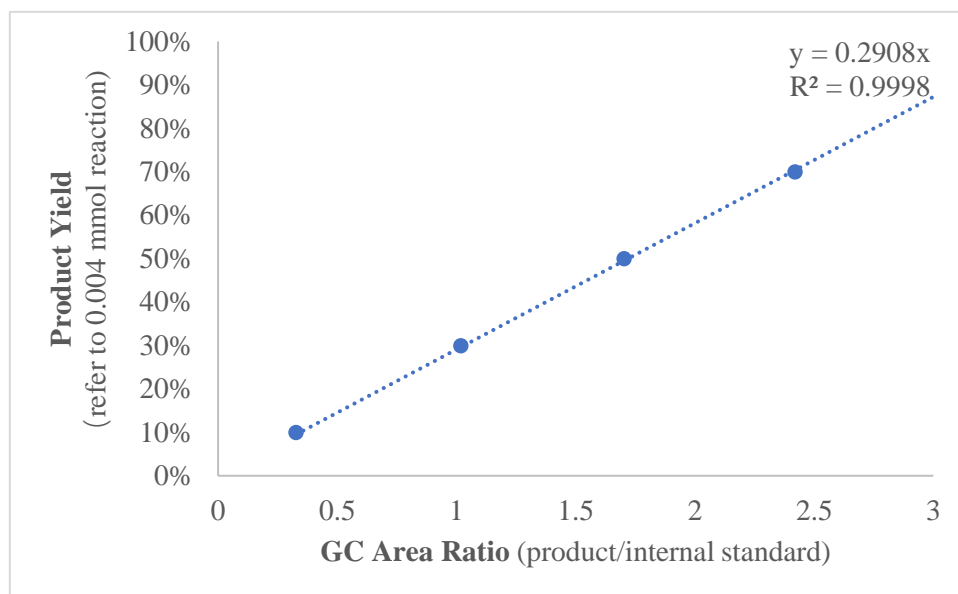

**Enantiomeric excess** was established by HPLC analysis using a Chiralpak AS-H column (HPLC: AS-H, 254 nm, *n*-hexane/isopropanol = 95:5, flow rate 0.5 mL/min, 30 °C,  $t_r$  (major) = 10.61 min,  $t_r$  (minor) = 12.40 min).

HPLC trace of *rac*-**3p**:

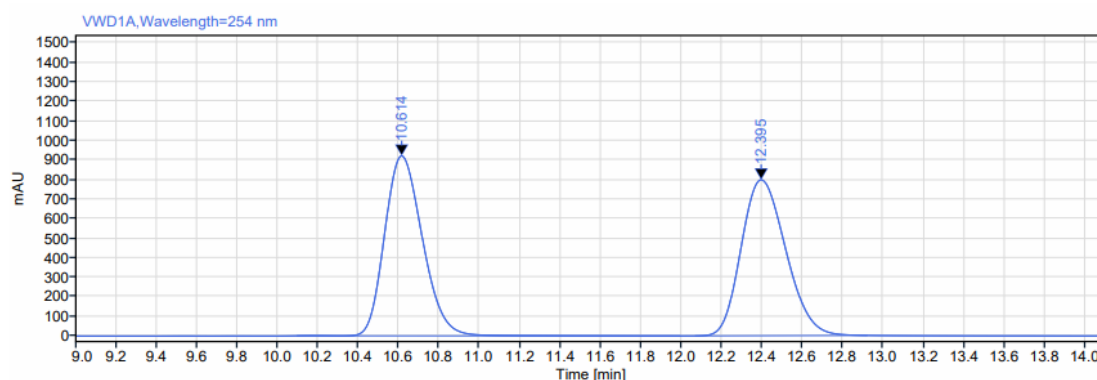

Signal: VWD1A, Wavelength=254 nm

| RT [min] | Type | Area     | Height | Area% |
|----------|------|----------|--------|-------|
| 10.614   | MB m | 11994.93 | 921.80 | 49.50 |
| 12.395   | MM m | 12234.95 | 798.74 | 50.50 |
|          | Sum  | 24229.88 |        |       |

HPLC trace of enantioenriched-**3p** obtained in a 0.004 mmol reaction:

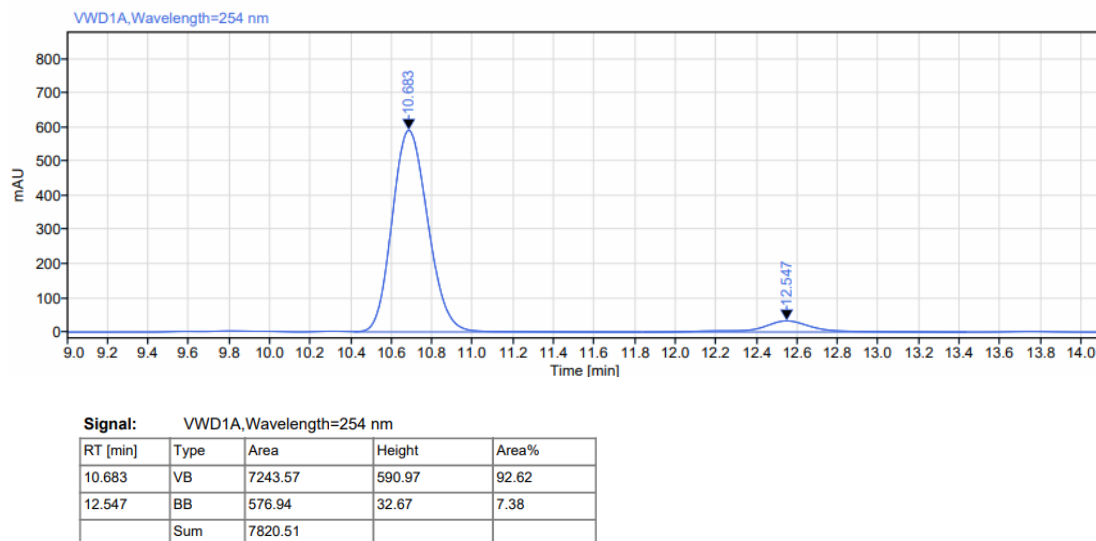

*Rac-3p* is a white solid (195 mg, 75%). The NMR spectra of *rac-3p* match the one previously reported<sup>28</sup>.

**<sup>1</sup>H NMR (400 MHz, CDCl<sub>3</sub>)**  $\delta$  8.47 (s, 1H), 8.00 (dd,  $J$  = 8.6, 1.8 Hz, 1H), 7.88 (d,  $J$  = 8.0 Hz, 1H), 7.80 (dd,  $J$  = 8.5, 2.0 Hz, 2H), 7.57-7.44 (m, 2H), 7.37-7.31 (m, 2H), 7.32-7.24 (m, 2H), 7.22-7.13 (m, 1H), 4.84 (q,  $J$  = 6.8 Hz, 1H), 1.59 (d,  $J$  = 6.8 Hz, 3H).

**<sup>13</sup>C NMR (100 MHz, CDCl<sub>3</sub>)**  $\delta$  200.2, 141.5, 135.3, 133.8, 132.4, 130.4, 129.6, 129.0, 128.3, 128.3, 127.7, 127.6, 126.9, 126.6, 124.5, 47.9, 19.5.

**MS** (EI,  $m/z$ ) calcd. for C<sub>19</sub>H<sub>16</sub>O [M]<sup>+</sup> 260.1, found: 260.1.

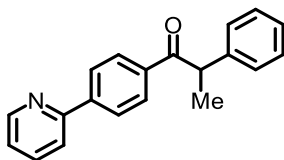

### 2-Phenyl-1-(4-(pyridin-2-yl)phenyl)propan-1-one (**3q**)

By using the typical procedure described in Section 4, the reaction of 4-(pyridin-2-yl)benzaldehyde **1q** (0.004 mmol) and ethylbenzene **2a** (0.016 mmol) catalysed by **RAT<sub>CH</sub>** (2 mol%) afforded **3q** in 58% **GC yield** (average of duplicate runs), with a 95% ee.



GC calibration curve for **3q** is displayed below.

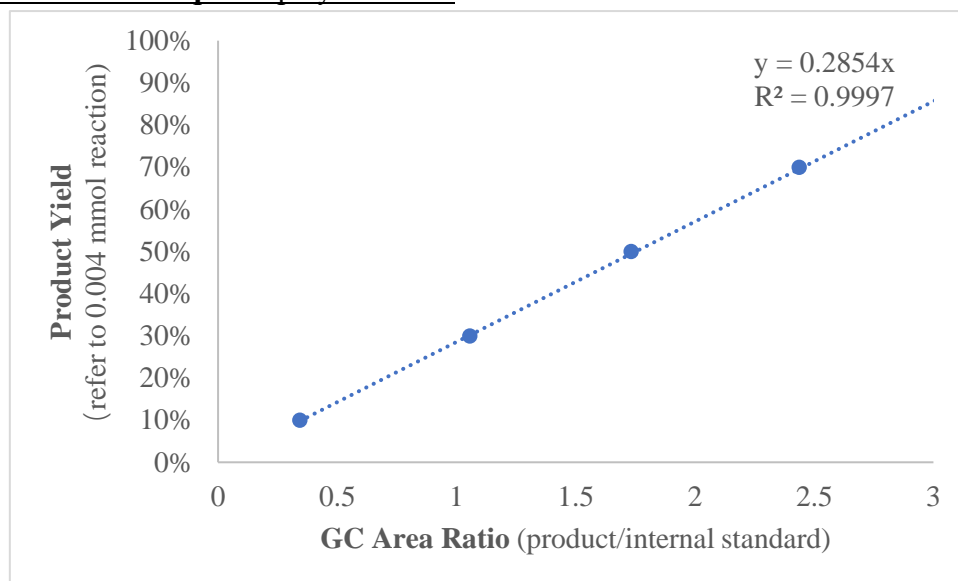

**Enantiomeric excess** was established by HPLC analysis using a Chiralpak AS-H column (HPLC: AS-H, 254 nm, *n*-hexane/isopropanol =85:15, flow rate 1.0 mL/min, 30 °C,  $t_r$  (major) = 13.59 min,  $t_r$  (minor) = 8.30 min).

HPLC trace of *rac*-**3q**:

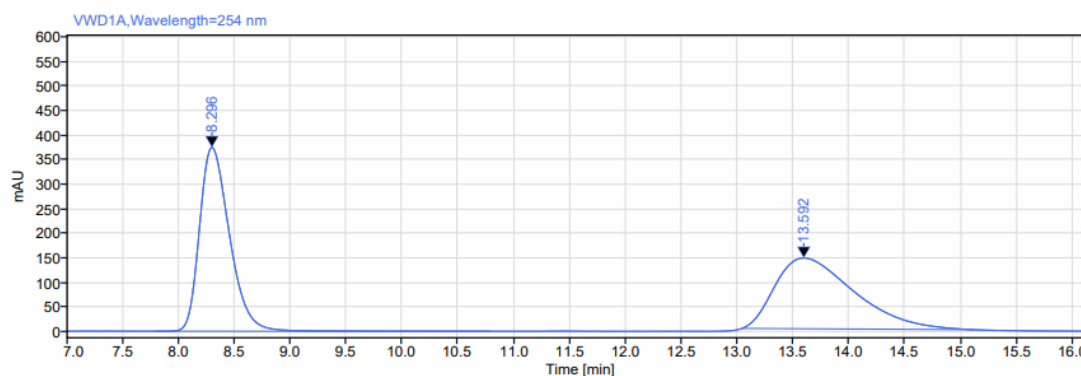

Signal: VWD1A,Wavelength=254 nm

| RT [min] | Type | Area     | Height | Area% |
|----------|------|----------|--------|-------|
| 8.296    | BB   | 6971.98  | 374.32 | 49.64 |
| 13.592   | MM m | 7074.35  | 144.03 | 50.36 |
|          | Sum  | 14046.33 |        |       |

HPLC trace of enantioenriched-**3q** obtained in a 0.004 mmol reaction:

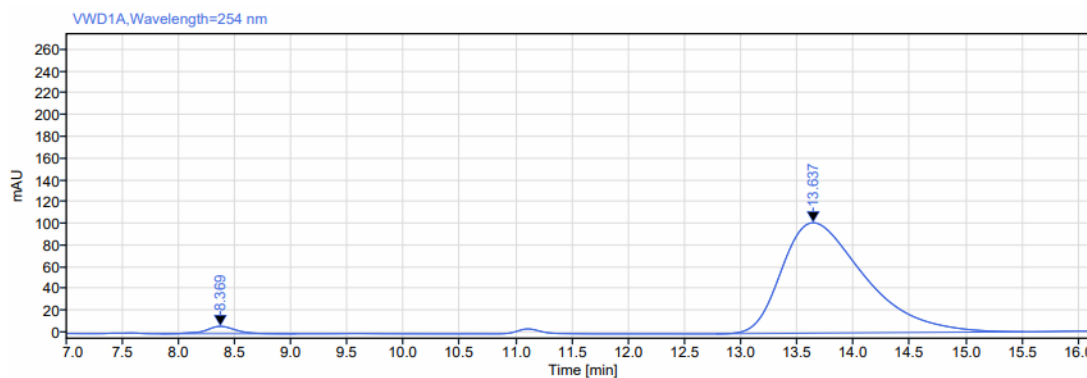

Signal: VWD1A,Wavelength=254 nm

| RT [min] | Type | Area    | Height | Area% |
|----------|------|---------|--------|-------|
| 8.369    | BB   | 124.94  | 6.83   | 2.35  |
| 13.637   | BB   | 5181.00 | 101.60 | 97.65 |
|          | Sum  | 5305.95 |        |       |

The reaction was scaled up to 0.1 mmol, which afforded 15.5 mg **3q**, corresponding to a 54% isolated yield with a 96% ee.

<sup>1</sup>H NMR (400 MHz, CDCl<sub>3</sub>) of enantioenriched-**3q** obtained in a 0.1 mmol reaction:

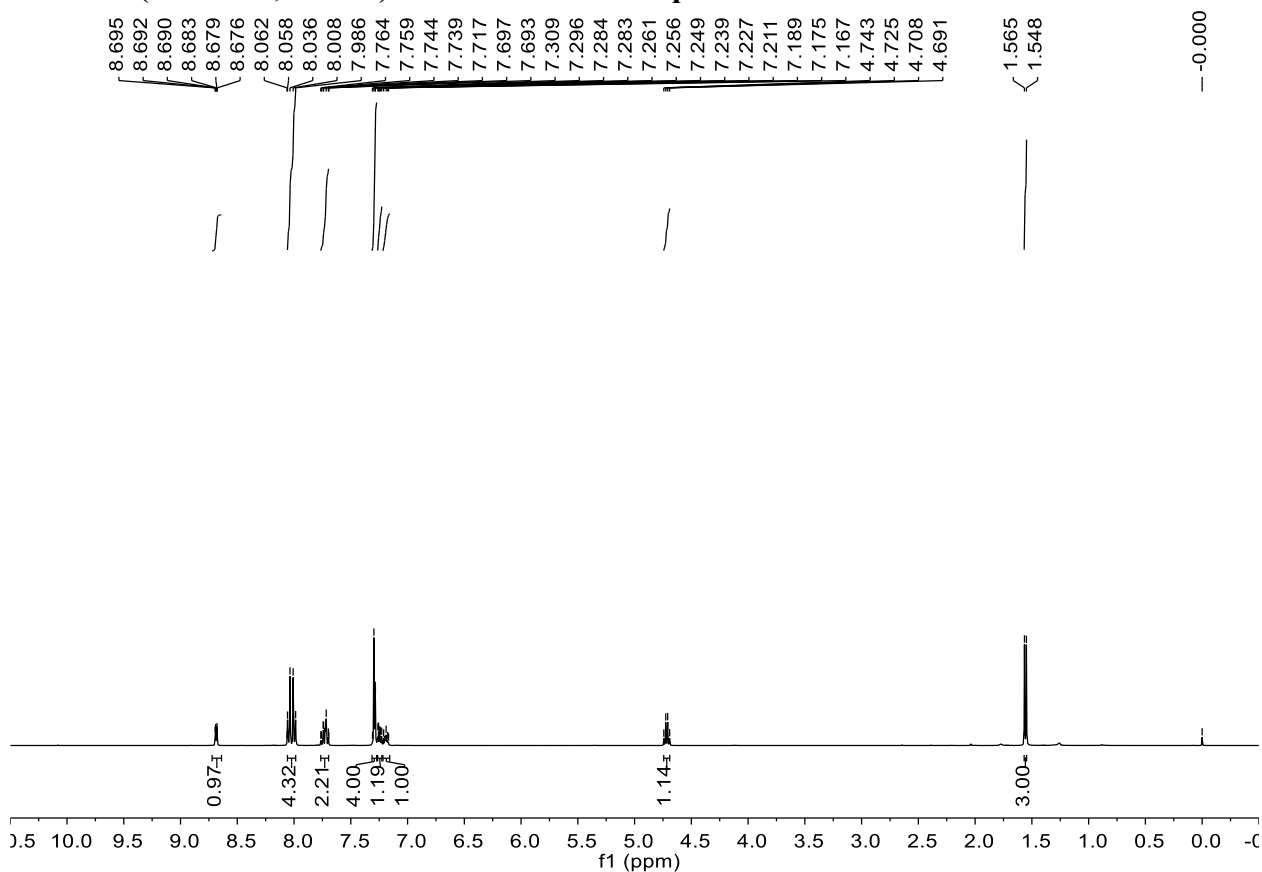

**Enantiomeric excess** was established by HPLC analysis using a Chiralpak AS-H column (HPLC: AS-H, 254 nm, *n*-hexane/isopropanol = 85:15, flow rate 1.0 mL/min, 30 °C, *t<sub>r</sub>* (major) = 14.16 min, *t<sub>r</sub>* (minor) = 8.43 min).

HPLC trace of *rac*-**3q**:

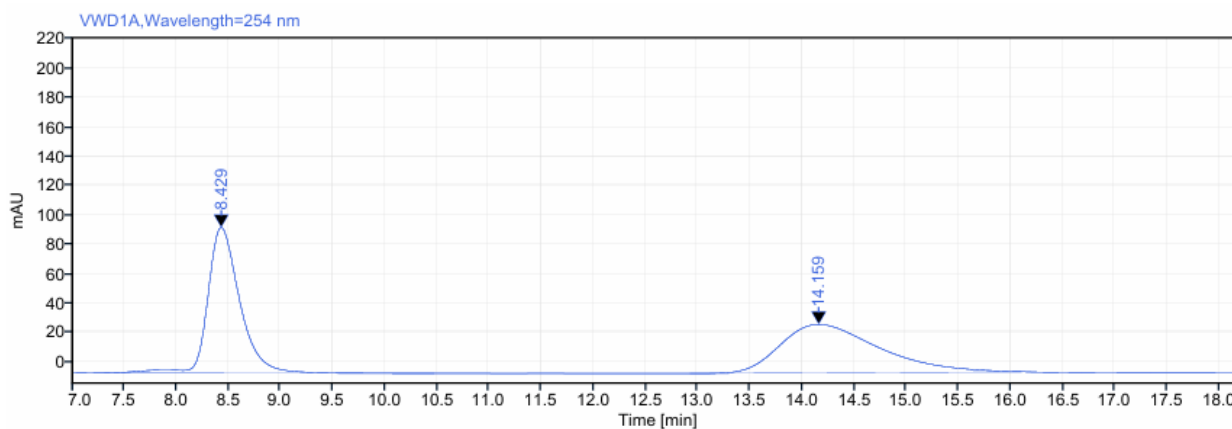

Signal: VWD1A,Wavelength=254 nm

| RT [min] | Type | Area    | Height | Area% |
|----------|------|---------|--------|-------|
| 8.429    | MB m | 2128.08 | 99.20  | 49.60 |
| 14.159   | BM m | 2162.02 | 33.00  | 50.40 |
|          | Sum  | 4290.10 |        |       |

HPLC trace of **3q** obtained in a 0.1 mmol reaction:

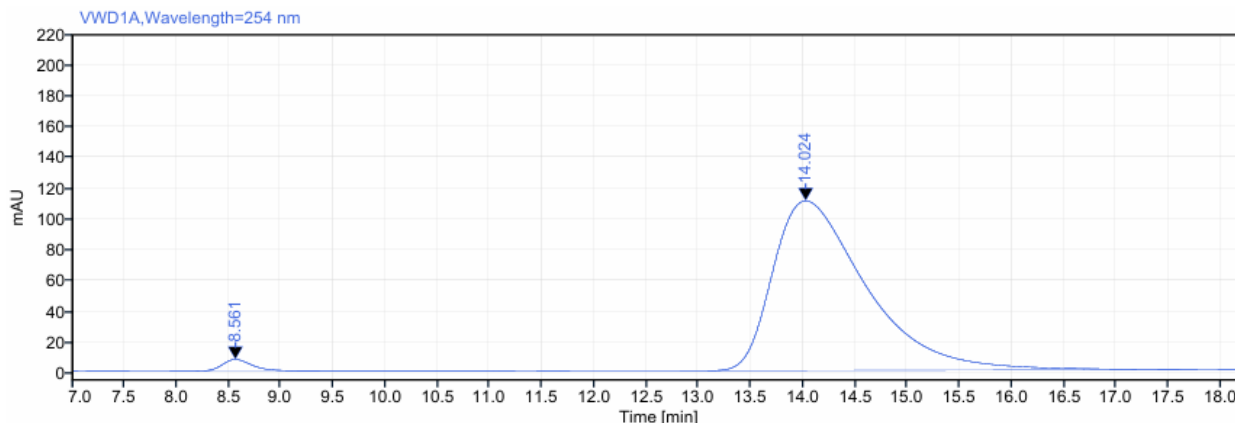

Signal: VWD1A,Wavelength=254 nm

| RT [min] | Type | Area    | Height | Area% |
|----------|------|---------|--------|-------|
| 8.561    | BB   | 142.67  | 7.41   | 2.04  |
| 14.024   | BM m | 6855.24 | 110.14 | 97.96 |
|          | Sum  | 6997.91 |        |       |

*Rac*-**3q** is a white solid (82 mg, 29%).

**<sup>1</sup>H NMR (400 MHz, CDCl<sub>3</sub>)**  $\delta$  8.72-8.66 (m, 1H), 8.08-8.02 (m, 2H), 8.03-7.97 (m, 2H), 7.79-7.68 (m, 2H), 7.32-7.27 (m, 4H), 7.28-7.22 (m, 1H), 7.23-7.15 (m, 1H), 4.72 (q, *J* = 6.8 Hz, 1H), 1.56 (d, *J* = 6.8 Hz, 3H).

**<sup>13</sup>C NMR (100 MHz, CDCl<sub>3</sub>)**  $\delta$  199.9, 156.1, 149.8, 143.2, 141.4, 136.8, 136.5, 129.3, 129.0, 127.8, 126.91, 126.89, 122.8, 120.9, 48.1, 19.4.

**HRMS** (ESI, *m/z*) calcd. for C<sub>20</sub>H<sub>18</sub>NO [M+H]<sup>+</sup> 288.1383, found: 288.1380.

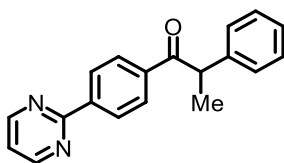

### 2-Phenyl-1-(4-(pyrimidin-2-yl)phenyl)propan-1-one (**3r**)

By using the typical procedure described in Section 4, the reaction of 4-(pyrimidin-2-yl)benzaldehyde **1r** (0.004 mmol) and ethylbenzene **2a** (0.016 mmol) catalysed by **RAT<sub>CH</sub>** (2 mol%) afforded **3r** in 58% **GC yield** (average of duplicate runs), with a 92% ee.

GC calibration curve for **3r** is displayed below.

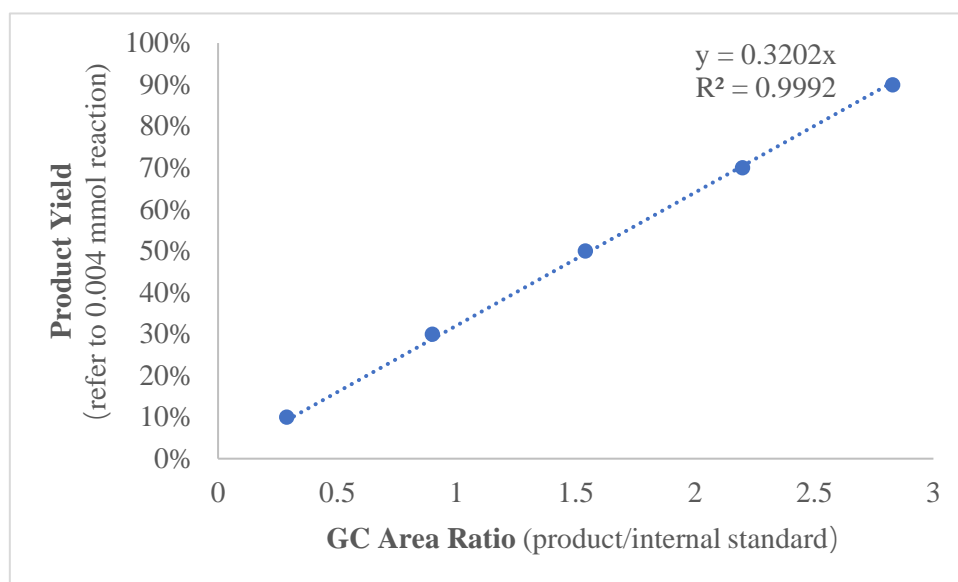

**Enantiomeric excess** was established by HPLC analysis using a Chiralpak AS-H column (HPLC: AS-H, 254 nm, *n*-hexane/isopropanol = 95:5, flow rate 0.5 mL/min, 30 °C,  $t_r$  (major) = 26.21 min,  $t_r$  (minor) = 23.11 min).

### HPLC trace of *rac*-**3r**:

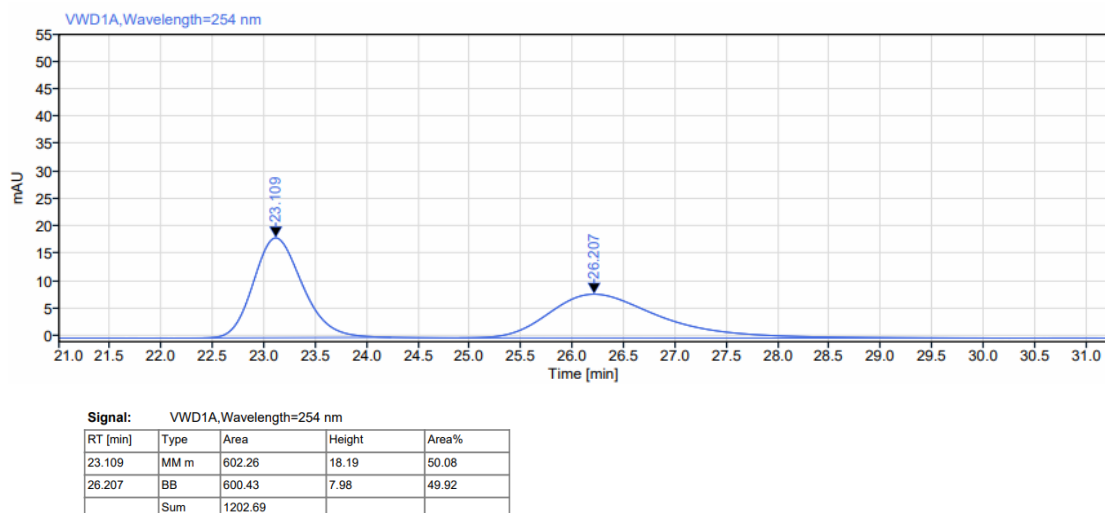

### HPLC trace of enantioenriched-**3r** obtained in a 0.004 mmol reaction:

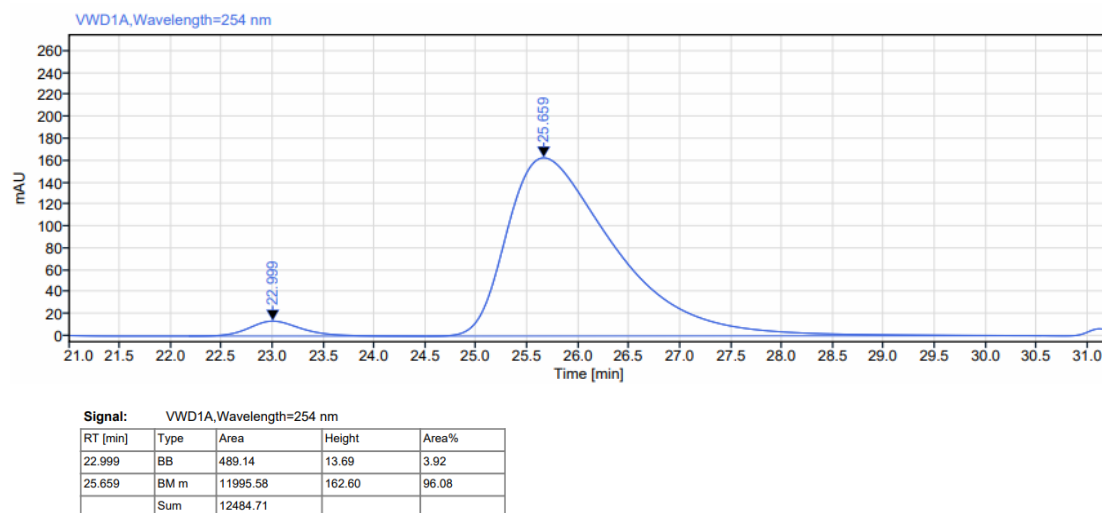

*Rac*-**3r** is a white solid (150 mg, 52%).

**<sup>1</sup>H NMR (400 MHz, CDCl<sub>3</sub>)**  $\delta$  8.80 (d,  $J$  = 4.8 Hz, 2H), 8.48-8.41 (m, 2H), 8.09-8.02 (m, 2H), 7.32-7.26 (m, 4H), 7.23-7.17 (m, 2H), 4.73 (q,  $J$  = 6.8 Hz, 1H), 1.56 (d,  $J$  = 6.9 Hz, 3H).

**<sup>13</sup>C NMR (100 MHz, CDCl<sub>3</sub>)**  $\delta$  200.1, 163.7, 157.3, 141.3, 138.0, 129.0, 128.98, 128.2, 127.8, 126.9, 119.6, 48.2, 19.4.

**HRMS** (ESI,  $m/z$ ) calcd. for C<sub>19</sub>H<sub>17</sub>N<sub>2</sub>O [M+H]<sup>+</sup> 289.1335, found: 289.1332.

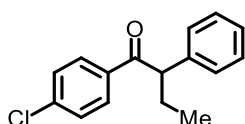

### **1-(4-Chlorophenyl)-2-phenylbutan-1-one (3s)**

By using the typical procedure described in Section 4, the reaction of 4-chlorobenzaldehyde **1a** (0.004 mmol) and propylbenzene **2b** (0.016 mmol) catalysed by **RAT<sub>CH</sub>** (2 mol%) afforded **3s** in 23% **GC yield** (average of duplicate runs), with a 92% ee.

GC calibration curve for **3s** is displayed below.

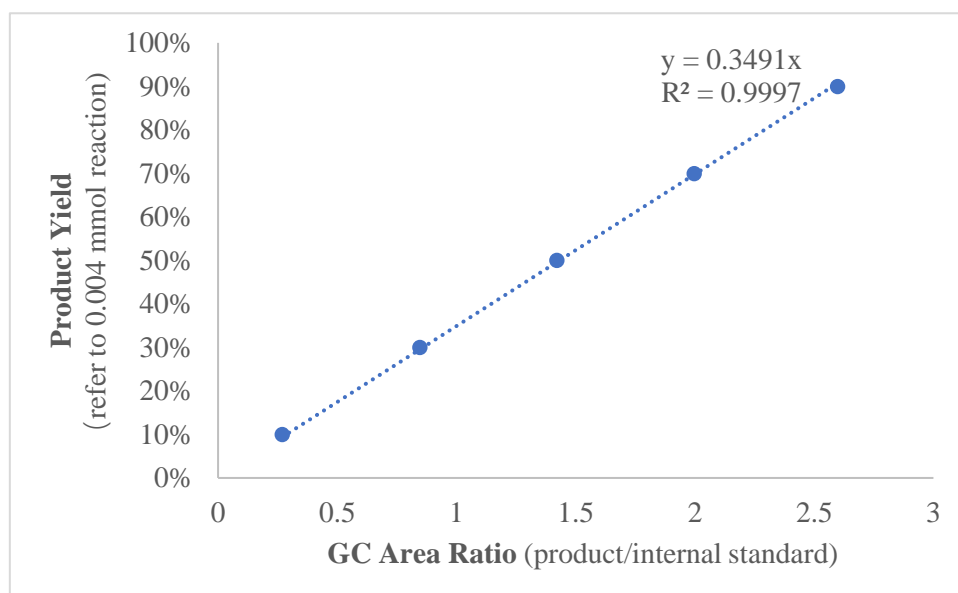

**Enantiomeric excess** was established by HPLC analysis using a Chiralcel OJ-H column (HPLC: OJ-H, 254 nm, *n*-hexane/isopropanol = 95:5, flow rate 0.5 mL/min, 30 °C,  $t_r$  (major) = 14.44 min,  $t_r$  (minor) = 16.42 min).

HPLC trace of *rac*-**3s**:

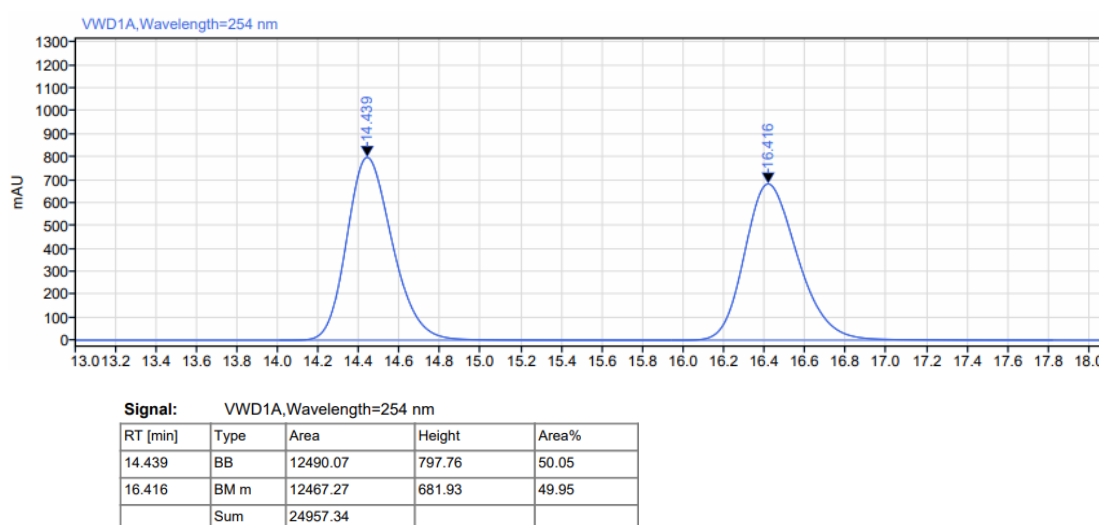

HPLC trace of enantioenriched-**3s** obtained in a 0.004 mmol reaction:

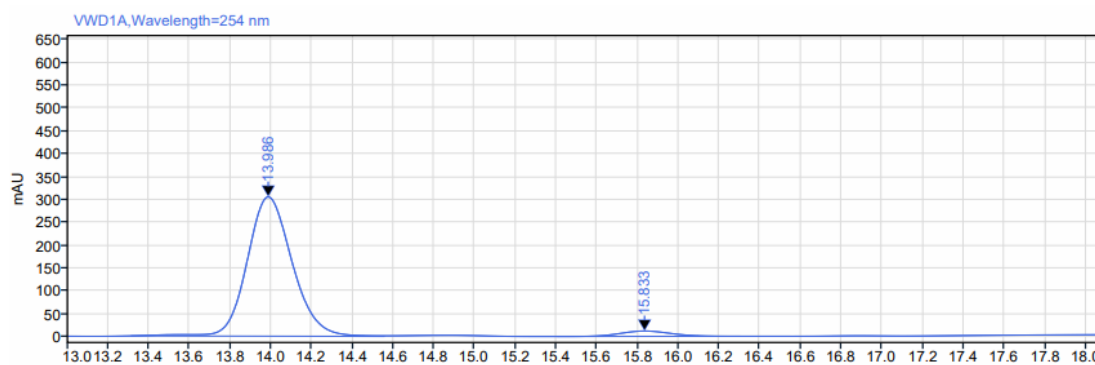

Signal: VWD1A,Wavelength=254 nm

| RT [min] | Type | Area    | Height | Area% |
|----------|------|---------|--------|-------|
| 13.986   | MV m | 4696.42 | 304.85 | 95.90 |
| 15.833   | BB   | 200.85  | 11.74  | 4.10  |
|          | Sum  | 4897.27 |        |       |

*Rac-3s* is a colorless oil (514 mg, 62%). The NMR spectra of *rac-3s* match the one previously reported<sup>28</sup>.

**<sup>1</sup>H NMR (400 MHz, CDCl<sub>3</sub>)**  $\delta$  7.92-7.85 (m, 2H), 7.37-7.28 (m, 2H), 7.27-7.25 (m, 3H), 7.20-7.16 (m, 1H), 4.36 (t, *J* = 7.2 Hz, 1H), 2.26-2.11 (m, 1H), 1.92-1.78 (m, 1H), 0.90 (t, *J* = 7.3 Hz, 3H).

**<sup>13</sup>C NMR (100 MHz, CDCl<sub>3</sub>)**  $\delta$  198.7, 139.3, 139.1, 135.2, 130.0, 128.9, 128.7, 128.1, 127.1, 55.6, 27.0, 12.2.

**MS** (EI, *m/z*) calcd. for C<sub>16</sub>H<sub>15</sub>ClO [M]<sup>+</sup> 258.1, found: 258.1.

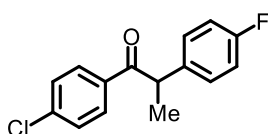

### 1-(4-Chlorophenyl)-2-(4-fluorophenyl)propan-1-one (**3t**)

By using the typical procedure described in Section 4, the reaction of 4-chlorobenzaldehyde **1a** (0.004 mmol) and 1-ethyl-4-fluorobenzene **2c** (0.016 mmol) catalysed by **RAT<sub>CH</sub>** (2 mol%) afforded **3t** in 58% GC yield (average of duplicate runs), with a 93% ee.

GC calibration curve for **3t** is displayed below.

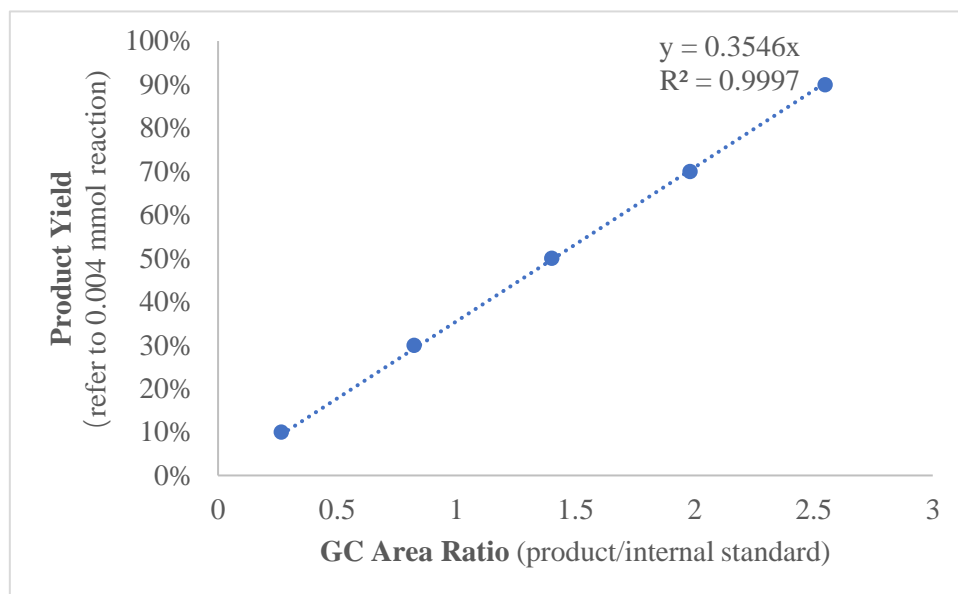

**Enantiomeric excess** was established by HPLC analysis using a Chiralpak AS-H column (HPLC: AS-H, 254 nm, *n*-hexane/isopropanol = 95:5, flow rate 0.5 mL/min, 30 °C, *t<sub>r</sub>* (major) = 10.58 min, *t<sub>r</sub>* (minor) = 14.41 min).

### HPLC trace of *rac*-**3t**:

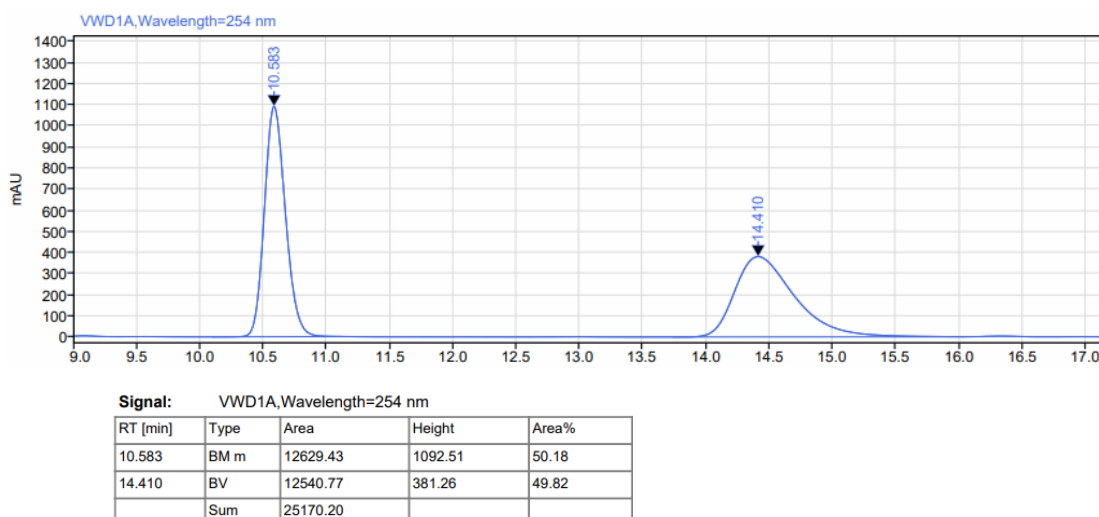

### HPLC trace of enantioenriched-**3t** obtained in a 0.004 mmol reaction:

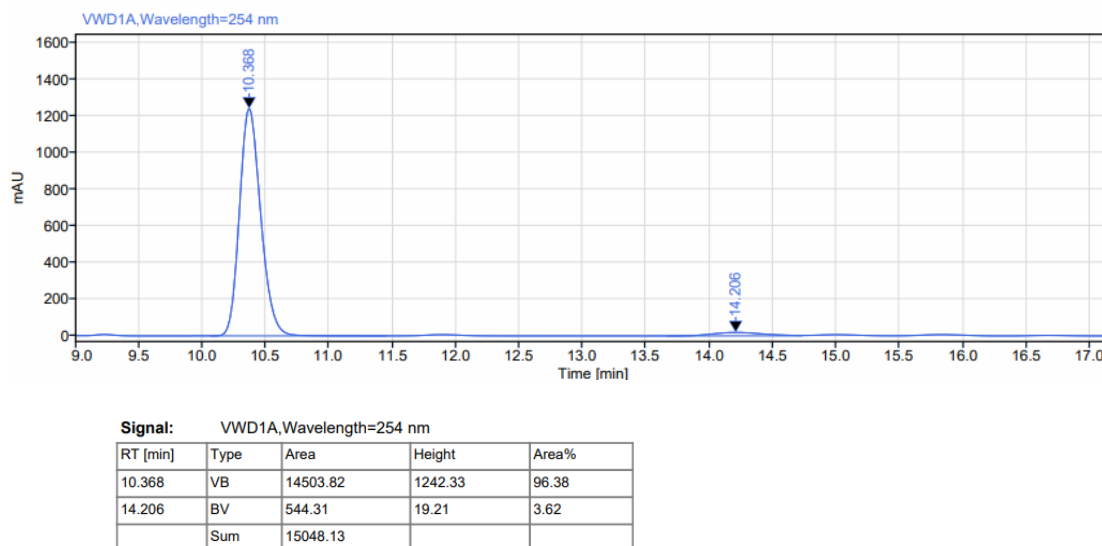

*Rac*-**3t** is a colorless oil (264 mg, 60%).

<sup>1</sup>H NMR (400 MHz, CDCl<sub>3</sub>) δ 7.90-7.82 (m, 2H), 7.39-7.32 (m, 2H), 7.28-7.17 (m, 2H), 7.03-6.93 (m, 2H), 4.61 (q, *J* = 6.8 Hz, 1H), 1.51 (d, *J* = 6.9 Hz, 3H).

<sup>13</sup>C NMR (100 MHz, CDCl<sub>3</sub>) δ 198.9, 161.8 (d, *J* = 244.2 Hz), 139.3, 136.8 (d, *J* = 3.2 Hz), 134.5, 130.1, 129.2 (d, *J* = 8.1 Hz), 128.8, 116.0 (d, *J* = 21.3 Hz), 47.1, 19.5.

HRMS (ESI, *m/z*) calcd. for C<sub>15</sub>H<sub>13</sub>ClFO [M+H]<sup>+</sup> 263.0633, found: 263.0631.

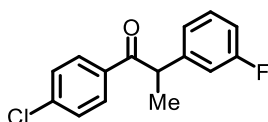

### 1-(4-Chlorophenyl)-2-(3-fluorophenyl)propan-1-one (**3u**)

By using the typical procedure described in Section 4, the reaction of 4-chlorobenzaldehyde **1a** (0.004 mmol) and 1-ethyl-3-fluorobenzene **2d** (0.016 mmol) catalysed by **RAT<sub>CH</sub>** (2 mol%) afforded **3u** in 59% GC yield (average of duplicate runs), with a 93% ee.

GC calibration curve for **3u** is displayed below.



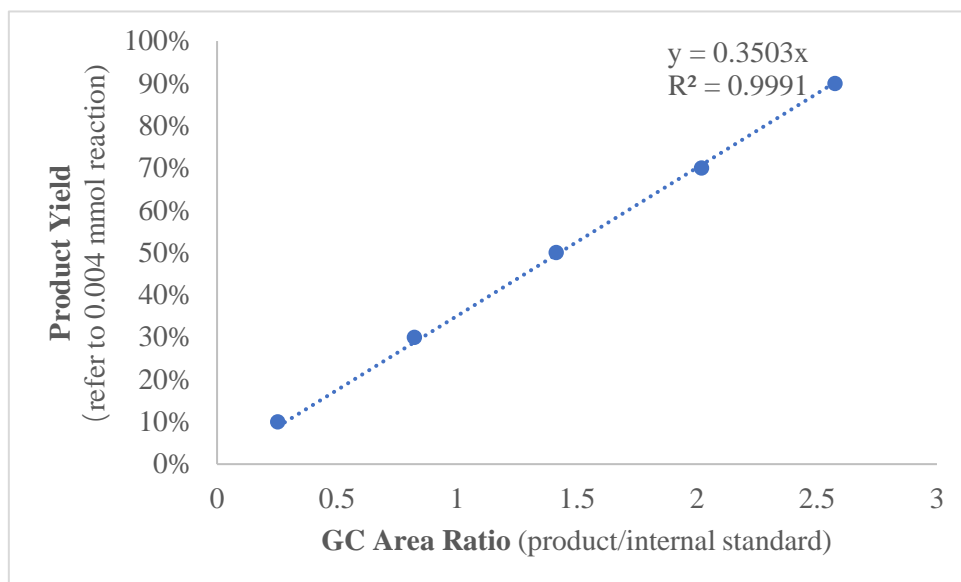

**Enantiomeric excess** was established by HPLC analysis using a Chiralpak AS-H column (HPLC: AS-H, 254 nm, *n*-hexane/isopropanol = 95:5, flow rate 0.5 mL/min, 30 °C,  $t_r$  (major) = 10.51 min,  $t_r$  (minor) = 11.91 min).

HPLC trace of *rac*-**3u**:

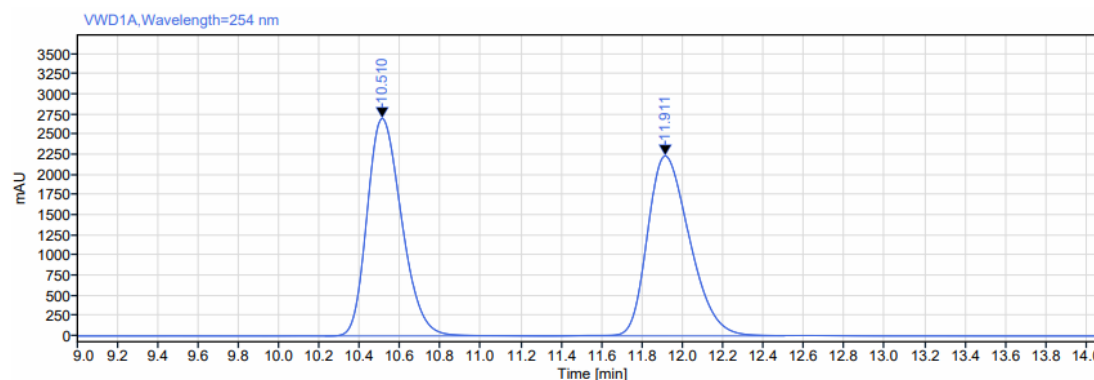

Signal: VWD1A, Wavelength=254 nm

| RT [min] | Type | Area     | Height  | Area% |
|----------|------|----------|---------|-------|
| 10.510   | VB   | 32062.43 | 2698.96 | 49.72 |
| 11.911   | BV   | 32422.80 | 2233.36 | 50.28 |
|          | Sum  | 64485.23 |         |       |

HPLC trace of enantioenriched-**3u** obtained in a 0.004 mmol reaction:

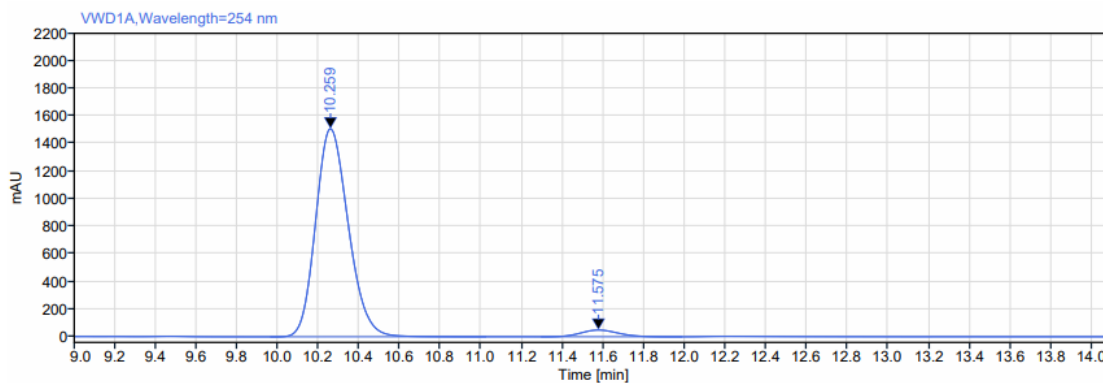

Signal: VWD1A, Wavelength=254 nm

| RT [min] | Type | Area     | Height  | Area% |
|----------|------|----------|---------|-------|
| 10.259   | BB   | 16812.98 | 1507.67 | 96.43 |
| 11.575   | BB   | 623.03   | 48.77   | 3.57  |
|          | Sum  | 17436.00 |         |       |

*Rac-3u* is a colorless oil (168 mg, 64%).

**<sup>1</sup>H NMR (400 MHz, CDCl<sub>3</sub>)**  $\delta$  7.90-7.83 (m, 2H), 7.38-7.31 (m, 2H), 7.30-7.20 (m, 1H), 7.07-7.00 (m, 1H), 7.01-6.94 (m, 1H), 6.94-6.85 (m, 1H), 4.62 (q, *J* = 6.8 Hz, 1H), 1.52 (d, *J* = 6.8 Hz, 3H).

**<sup>13</sup>C NMR (100 MHz, CDCl<sub>3</sub>)**  $\delta$  198.4, 163.0 (d, *J* = 245.4 Hz), 143.5 (d, *J* = 7.2 Hz), 139.4, 134.5, 130.5 (d, *J* = 8.1 Hz), 130.1, 128.8, 123.4 (d, *J* = 2.9 Hz), 114.6 (d, *J* = 21.5 Hz), 114.0 (d, *J* = 21.1 Hz), 47.5 (d, *J* = 1.7 Hz), 19.2.

**HRMS** (ESI, *m/z*) calcd. for C<sub>15</sub>H<sub>13</sub>ClFO [M+H]<sup>+</sup> 263.0633, found: 263.0630.

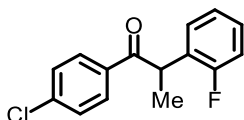

### 1-(4-Chlorophenyl)-2-(2-fluorophenyl)propan-1-one (**3v**)

By using the typical procedure described in Section 4, the reaction of 4-chlorobenzaldehyde **1a** (0.004 mmol) and 1-ethyl-2-fluorobenzene **2e** (0.016 mmol) catalysed by **RAT<sub>CH</sub>** (2 mol%) afforded **3v** in 43% GC yield (average of duplicate runs), with a 95% ee.

GC calibration curve for **3v** is displayed below.

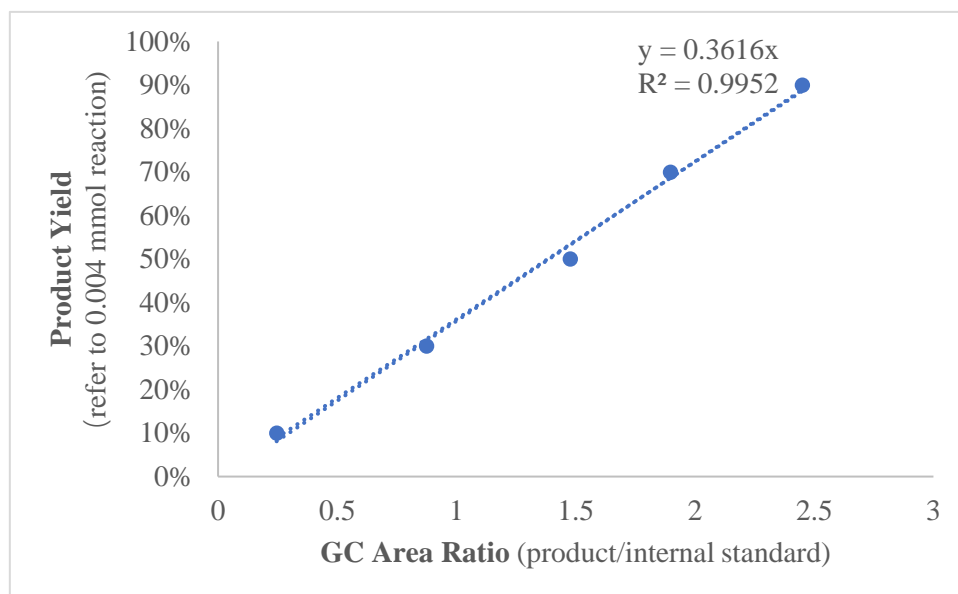

**Enantiomeric excess** was established by HPLC analysis using a Chiralpak AS-H column (HPLC: AS-H, 254 nm, *n*-hexane/isopropanol = 95:5, flow rate 0.5 mL/min, 30 °C,  $t_r$  (major) = 8.32 min,  $t_r$  (minor) = 9.30 min).

HPLC trace of *rac*-**3v**:

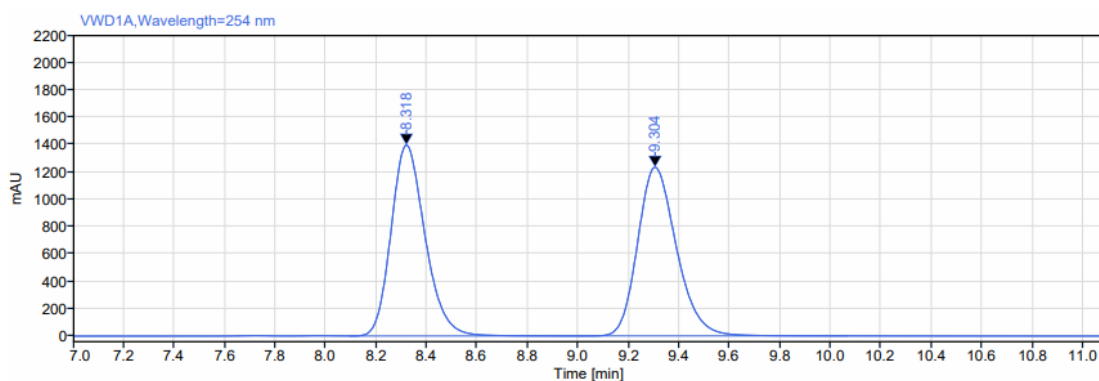

Signal: VWD1A, Wavelength=254 nm

| RT [min] | Type | Area     | Height  | Area% |
|----------|------|----------|---------|-------|
| 8.318    | VB   | 13102.53 | 1397.38 | 49.82 |
| 9.304    | BM m | 13199.38 | 1234.44 | 50.18 |
|          | Sum  | 26301.91 |         |       |

HPLC trace of enantioenriched-**3v** obtained in a 0.004 mmol reaction:

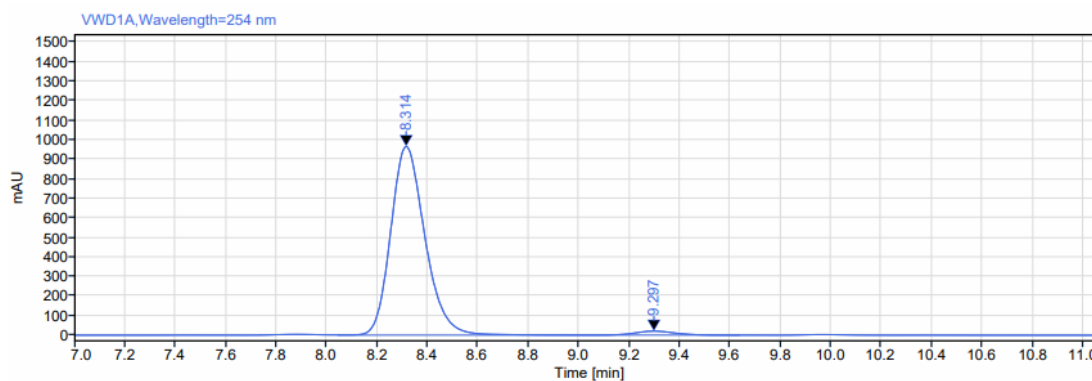

Signal: VWD1A, Wavelength=254 nm

| RT [min] | Type | Area    | Height | Area% |
|----------|------|---------|--------|-------|
| 8.314    | VV   | 9131.47 | 966.92 | 97.56 |
| 9.297    | VB   | 227.94  | 20.59  | 2.44  |
|          | Sum  | 9359.41 |        |       |

*Rac*-**3v** is a colorless oil (121 mg, 77%).

**<sup>1</sup>H NMR (400 MHz, CDCl<sub>3</sub>)**  $\delta$  7.92-7.85 (m, 2H), 7.39-7.32 (m, 2H), 7.24-7.12 (m, 2H), 7.10-7.01 (m, 2H), 4.96 (q, *J* = 6.8 Hz, 1H), 1.51 (d, *J* = 6.8 Hz, 3H).

**<sup>13</sup>C NMR (100 MHz, CDCl<sub>3</sub>)**  $\delta$  198.6, 159.6 (d, *J* = 243.4 Hz), 139.4, 134.3, 129.9, 128.9, 128.8 (d, *J* = 8.3 Hz), 128.7 (d, *J* = 3.8 Hz), 128.0 (d, *J* = 15.3 Hz), 124.7 (d, *J* = 3.5 Hz), 115.7 (d, *J* = 22.4 Hz), 39.6 (d, *J* = 2.3 Hz), 17.9.

**HRMS** (ESI, *m/z*) calcd. for C<sub>15</sub>H<sub>13</sub>ClFO [M+H]<sup>+</sup> 263.0633, found: 263.0631.

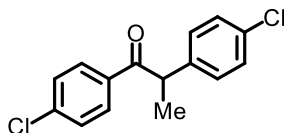

### 1,2-Bis(4-chlorophenyl)propan-1-one (**3w**)

By using the typical procedure described in Section 4, the reaction of 4-chlorobenzaldehyde **1a** (0.004 mmol) and 1-chloro-4-ethylbenzene **2f** (0.016 mmol) catalysed by **RAT<sub>CH</sub>** (2 mol%) afforded **3w** in 54% GC yield (average of duplicate runs), with a 94% ee.

GC calibration curve for **3w** is displayed below.

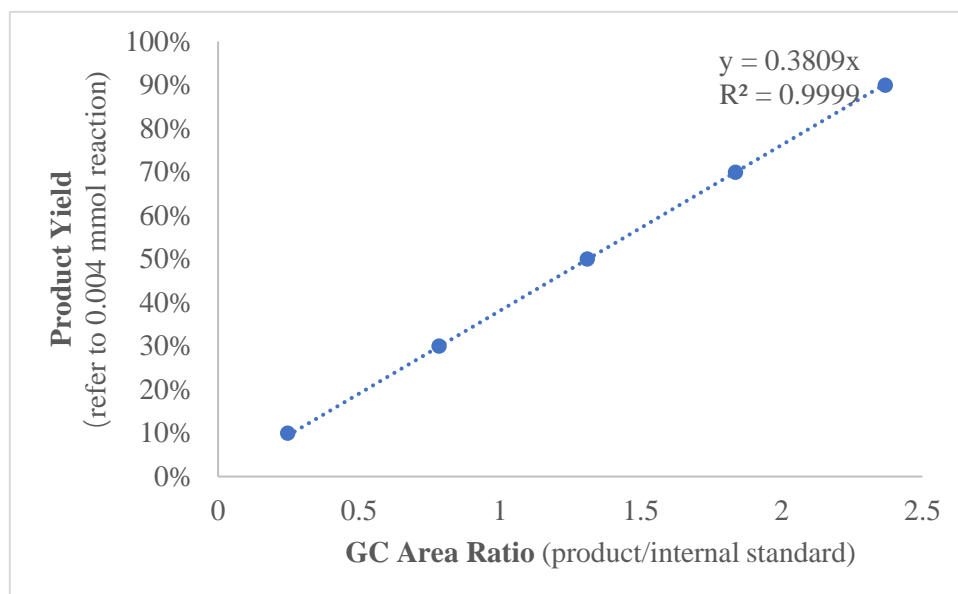

**Enantiomeric excess** was established by HPLC analysis using a Chiralpak AS-H column (HPLC: AS-H, 254 nm, *n*-hexane/isopropanol = 95:5, flow rate 0.5 mL/min, 30 °C,  $t_r$  (major) = 11.22 min,  $t_r$  (minor) = 12.82 min).

HPLC trace of *rac*-**3w**:

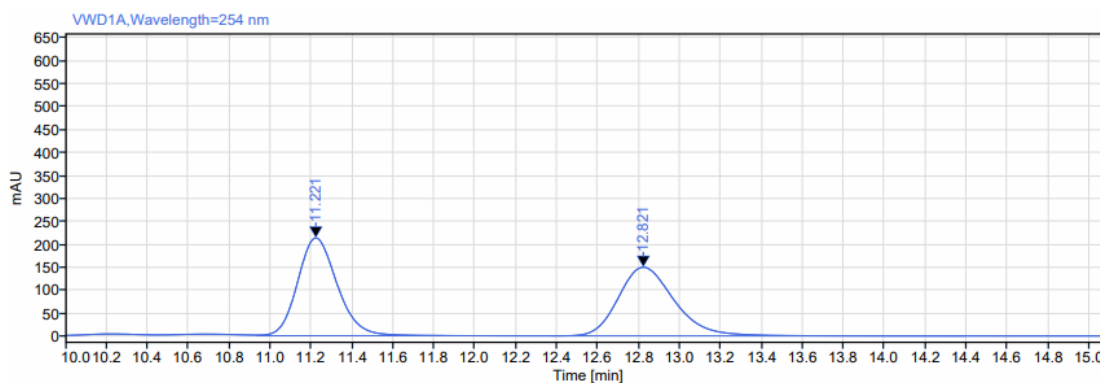

Signal: VWD1A, Wavelength=254 nm

| RT [min] | Type | Area    | Height | Area% |
|----------|------|---------|--------|-------|
| 11.221   | VM m | 2850.85 | 212.94 | 50.10 |
| 12.821   | BM m | 2839.36 | 149.53 | 49.90 |
|          | Sum  | 5690.21 |        |       |

HPLC trace of enantioenriched-**3w** obtained in a 0.004 mmol reaction:

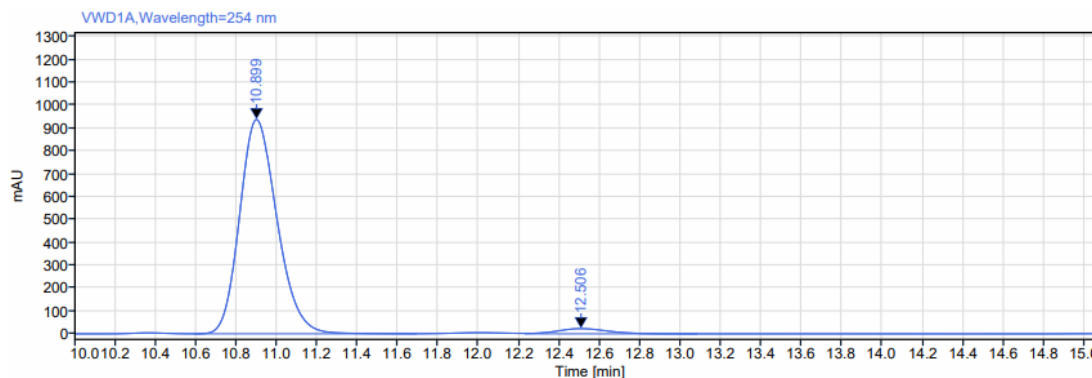

Signal: VWD1A, Wavelength=254 nm

| RT [min] | Type | Area     | Height | Area% |
|----------|------|----------|--------|-------|
| 10.899   | BV   | 12106.90 | 938.90 | 96.79 |
| 12.506   | VM m | 400.96   | 22.97  | 3.21  |
|          | Sum  | 12507.86 |        |       |

*Rac-3w* is a pale-yellow oil (154 mg, 68%). The NMR spectra of *rac-3w* match the one previously reported<sup>37</sup>.

**<sup>1</sup>H NMR (400 MHz, CDCl<sub>3</sub>)**  $\delta$  7.89-7.81 (m, 2H), 7.40-7.32 (m, 2H), 7.30-7.23 (m, 2H), 7.22-7.16 (m, 2H), 4.60 (q,  $J$  = 6.8 Hz, 1H), 1.51 (d,  $J$  = 6.9 Hz, 3H).

**<sup>13</sup>C NMR (100 MHz, CDCl<sub>3</sub>)**  $\delta$  198.7, 139.6, 139.4, 134.5, 133.0, 130.1, 129.2, 129.0, 128.9, 47.3, 19.3.

**MS** (EI,  $m/z$ ) calcd. for C<sub>15</sub>H<sub>12</sub>Cl<sub>2</sub>O [M]<sup>+</sup> 278.0, found: 278.0.

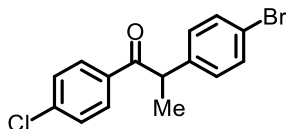

### 2-(4-Bromophenyl)-1-(4-chlorophenyl)propan-1-one (**3x**)

By using the typical procedure described in Section 4, the reaction of 4-chlorobenzaldehyde **1a** (0.004 mmol) and 1-bromo-4-ethylbenzene **2g** (0.016 mmol) catalysed by **RAT<sub>CH</sub>** (2 mol%) afforded **3x** in 54% GC yield (average of duplicate runs), with a 93% ee.

GC calibration curve for **3x** is displayed below.

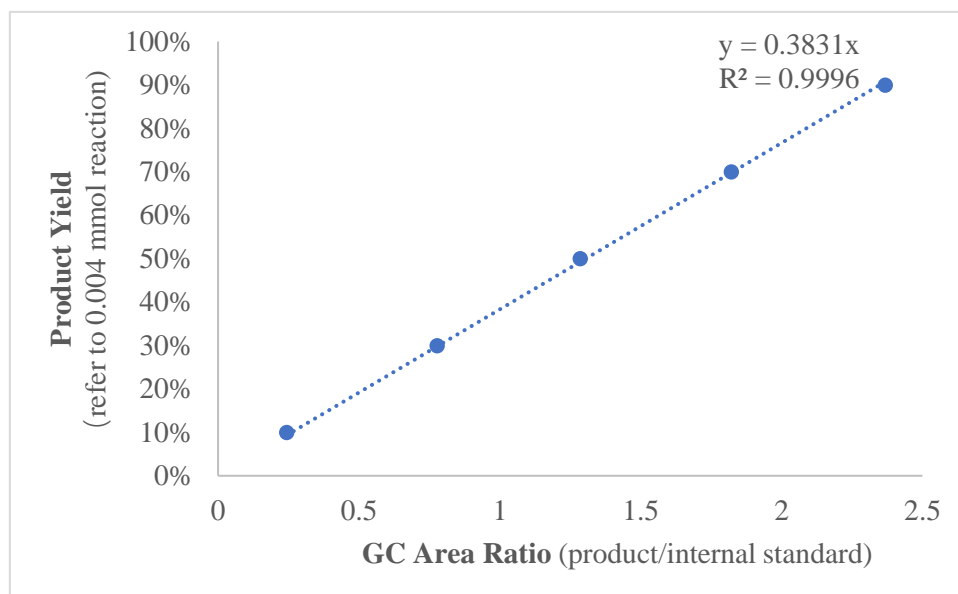

**Enantiomeric excess** was established by HPLC analysis using a Chiralpak AS-H column (HPLC: AS-H, 254 nm, *n*-hexane/isopropanol = 95:5, flow rate 0.5 mL/min, 30 °C,  $t_r$  (major) = 11.69 min,  $t_r$  (minor) = 13.37 min).

HPLC trace of *rac*-**3x**:

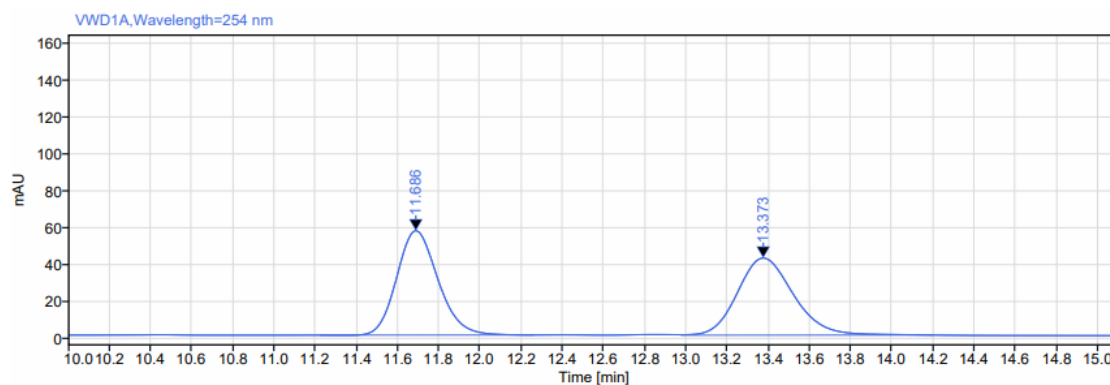

Signal: VWD1A, Wavelength=254 nm

| RT [min] | Type | Area    | Height | Area% |
|----------|------|---------|--------|-------|
| 11.686   | MB m | 788.25  | 56.60  | 49.92 |
| 13.373   | VM m | 790.79  | 41.84  | 50.08 |
|          | Sum  | 1579.03 |        |       |

HPLC trace of enantioenriched-**3x** obtained in a 0.004 mmol reaction:

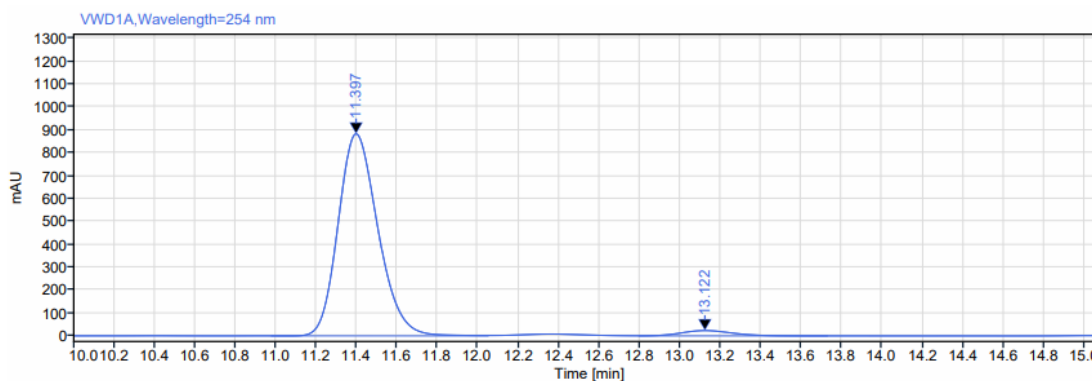

Signal: VWD1A, Wavelength=254 nm

| RT [min] | Type | Area     | Height | Area% |
|----------|------|----------|--------|-------|
| 11.397   | MV m | 12082.50 | 883.66 | 96.70 |
| 13.122   | VM m | 412.53   | 23.39  | 3.30  |
|          | Sum  | 12495.03 |        |       |

*Rac-3x* is a pale-yellow oil (1.12 g, 77%).

**<sup>1</sup>H NMR (400 MHz, CDCl<sub>3</sub>)**  $\delta$  7.89-7.81 (m, 2H), 7.46-7.38 (m, 2H), 7.40-7.32 (m, 2H), 7.17-7.09 (m, 2H), 4.58 (q, *J* = 6.8 Hz, 1H), 1.50 (d, *J* = 6.9 Hz, 3H).

**<sup>13</sup>C NMR (100 MHz, CDCl<sub>3</sub>)**  $\delta$  198.6, 140.1, 139.4, 134.5, 132.2, 130.1, 129.4, 128.9, 121.1, 47.3, 19.3.

**HRMS** (ESI, *m/z*) calcd. for C<sub>15</sub>H<sub>13</sub>BrClO [M+H]<sup>+</sup> 322.9833, found: 322.9831.

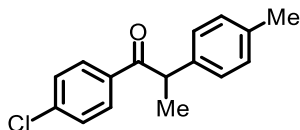

### 1-(4-Chlorophenyl)-2-(*p*-tolyl)propan-1-one (**3y**)

By using the typical procedure described in Section 4, the reaction of 4-chlorobenzaldehyde **1a** (0.004 mmol) and 1-ethyl-4-methylbenzene **2h** (0.016 mmol) catalysed by **RAT<sub>CH</sub>** (2 mol%) afforded **3y** in 52% GC yield (average of duplicate runs), with a 91% ee.



GC calibration curve for **3y** is displayed below.

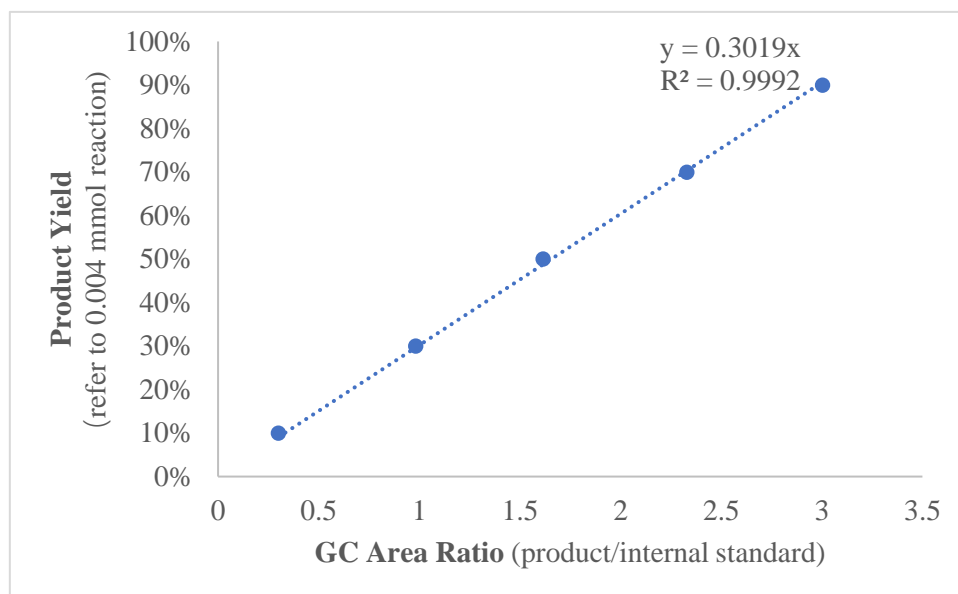

**Enantiomeric excess** was established by HPLC analysis using a Chiralcel OJ-H column (HPLC: OJ-H, 254 nm, *n*-hexane/isopropanol = 95:5, flow rate 0.5 mL/min, 30 °C,  $t_r$  (major) = 15.49 min,  $t_r$  (minor) = 18.22 min).

HPLC trace of *rac*-**3y**:

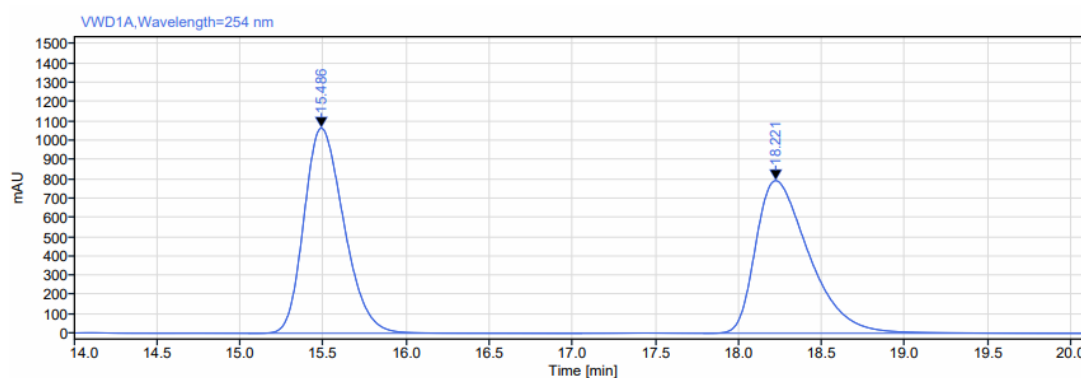

Signal: VWD1A, Wavelength=254 nm

| RT [min] | Type | Area     | Height  | Area% |
|----------|------|----------|---------|-------|
| 15.486   | BB   | 17776.24 | 1064.16 | 50.03 |
| 18.221   | VB   | 17756.58 | 791.59  | 49.97 |
|          | Sum  | 35532.82 |         |       |

HPLC trace of enantioenriched-**3y** obtained in a 0.004 mmol reaction:

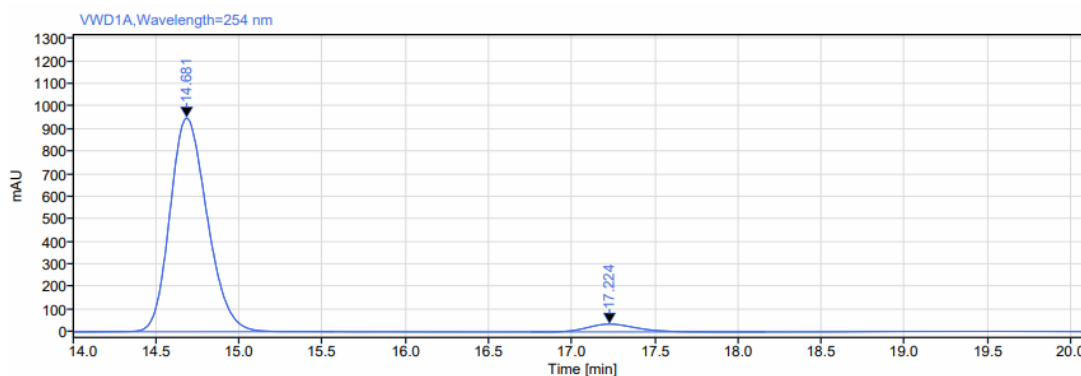

Signal: VWD1A,Wavelength=254 nm

| RT [min] | Type | Area     | Height | Area% |
|----------|------|----------|--------|-------|
| 14.681   | BM m | 14781.99 | 948.64 | 95.41 |
| 17.224   | BB   | 711.45   | 34.81  | 4.59  |
|          | Sum  | 15493.44 |        |       |

*Rac-3y* is a colorless oil (201 mg, 78%). The NMR spectra of *rac-3y* match the one previously reported<sup>38</sup>.

**<sup>1</sup>H NMR (400 MHz, CDCl<sub>3</sub>)**  $\delta$  7.90-7.84 (m, 2H), 7.36-7.28 (m, 2H), 7.11 (q,  $J$  = 8.0 Hz, 4H), 4.57 (q,  $J$  = 6.8 Hz, 1H), 2.27 (s, 3H), 1.50 (d,  $J$  = 6.8 Hz, 3H).

**<sup>13</sup>C NMR (100 MHz, CDCl<sub>3</sub>)**  $\delta$  199.1, 139.0, 138.1, 136.7, 134.8, 130.1, 129.8, 128.7, 127.5, 47.6, 21.0, 19.4.

**MS** (EI,  $m/z$ ) calcd. for C<sub>16</sub>H<sub>15</sub>ClO [M]<sup>+</sup> 258.1, found: 258.1.

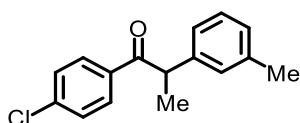

### 1-(4-Chlorophenyl)-2-(*m*-tolyl)propan-1-one (**3z**)

By using the typical procedure described in Section 4, the reaction of 4-chlorobenzaldehyde **1a** (0.004 mmol) and 1-ethyl-3-methylbenzene **2i** (0.016 mmol) catalysed by **RAT<sub>CH</sub>** (2 mol%) afforded **3z** in 58% **GC yield** (average of duplicate runs), with a 91% ee.

GC calibration curve for **3z** is displayed below.

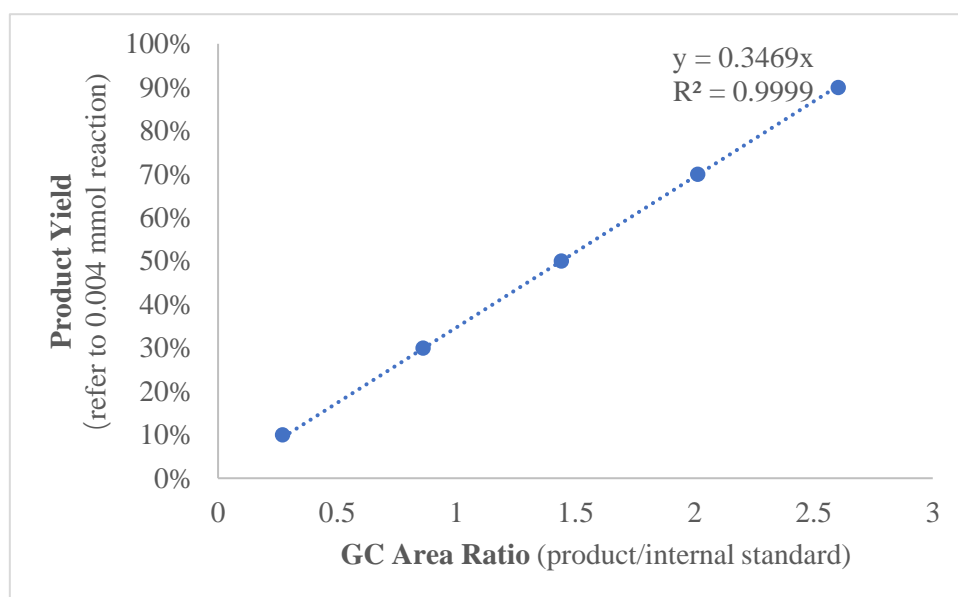

**Enantiomeric excess** was established by HPLC analysis using a Chiralcel OJ-H column (HPLC: OJ-H, 254 nm, *n*-hexane/isopropanol = 95:5, flow rate 0.5 mL/min, 30 °C,  $t_r$  (major) = 13.43 min,  $t_r$  (minor) = 15.40 min).

### HPLC trace of *rac*-3z:

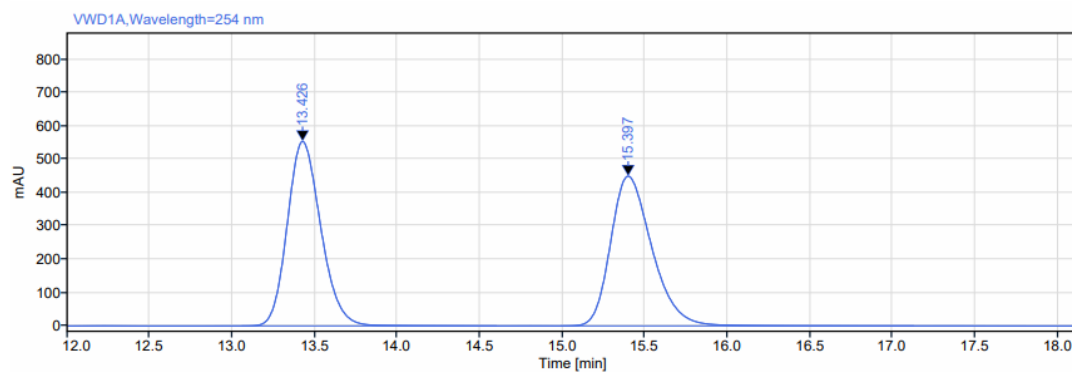

Signal: VWD1A,Wavelength=254 nm

| RT [min] | Type | Area     | Height | Area% |
|----------|------|----------|--------|-------|
| 13.426   | BB   | 7831.10  | 554.20 | 50.03 |
| 15.397   | BB   | 7821.75  | 450.03 | 49.97 |
| Sum      |      | 15652.85 |        |       |

### HPLC trace of enantioenriched-3z obtained in a 0.004 mmol reaction:

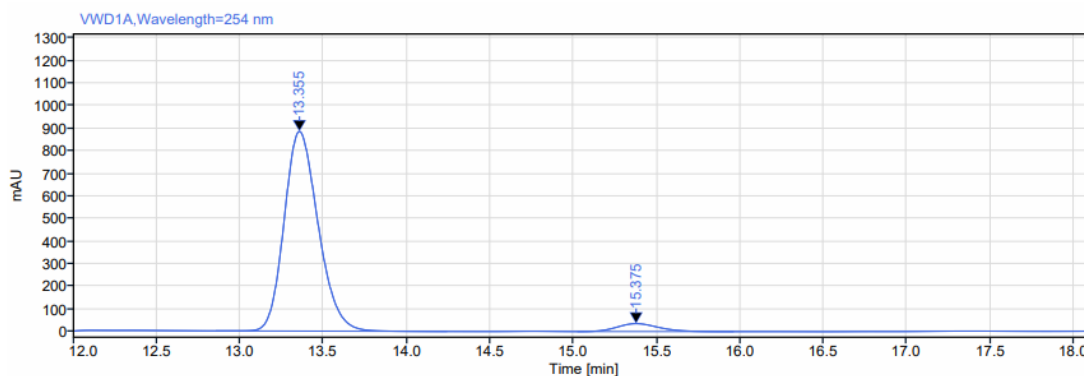

Signal: VWD1A,Wavelength=254 nm

| RT [min] | Type | Area     | Height | Area% |
|----------|------|----------|--------|-------|
| 13.355   | BB   | 12549.40 | 884.78 | 95.38 |
| 15.375   | BB   | 607.18   | 35.18  | 4.62  |
| Sum      |      | 13156.58 |        |       |

*Rac*-3z is a colorless oil (890 mg, 86%).

<sup>1</sup>H NMR (400 MHz, CDCl<sub>3</sub>)  $\delta$  7.91-7.84 (m, 2H), 7.37-7.30 (m, 2H), 7.22-7.14 (m, 1H), 7.07-6.99 (m, 3H), 4.57 (q, *J* = 6.8 Hz, 1H), 2.30 (s, 3H), 1.50 (d, *J* = 6.8 Hz, 3H).

<sup>13</sup>C NMR (100 MHz, CDCl<sub>3</sub>)  $\delta$  199.1, 141.1, 139.1, 138.8, 134.8, 130.2, 128.9, 128.7, 128.2, 127.8, 124.8, 48.0, 21.4, 19.4.

HRMS (ESI, *m/z*) calcd. for C<sub>16</sub>H<sub>16</sub>ClO [M+H]<sup>+</sup> 259.0884, found: 259.0881.

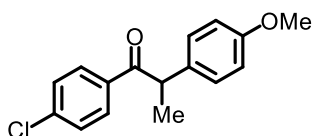

### **1-(4-Chlorophenyl)-2-(4-methoxyphenyl)propan-1-one (3aa)**

By using the typical procedure described in Section 4, the reaction of 4-chlorobenzaldehyde **1a** (0.004 mmol) and 1-ethyl-4-methoxybenzene **2j** (0.016 mmol) catalysed by **RAT<sub>CH</sub>** (2 mol%) afforded **3aa**

in 60% GC yield (average of duplicate runs), with a 87% ee.

GC calibration curve for **3aa** is displayed below.

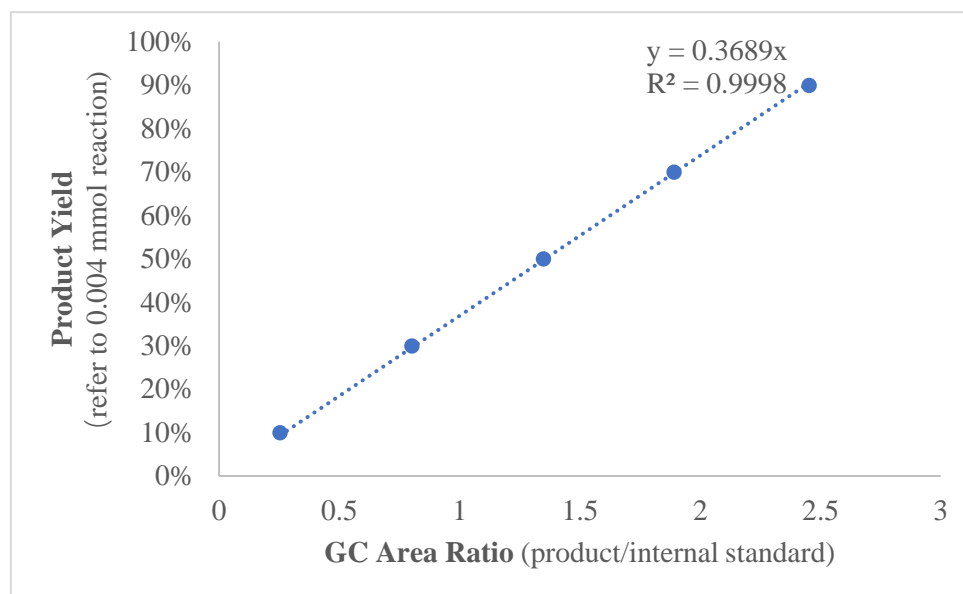

**Enantiomeric excess** was established by HPLC analysis using a Chiralpak AD-3 column (HPLC: AD-3, 254 nm, *n*-hexane/isopropanol = 95:5, flow rate 0.5 mL/min, 30 °C,  $t_r$  (major) = 18.82 min,  $t_r$  (minor) = 22.57 min).

HPLC trace of *rac*-**3aa**:

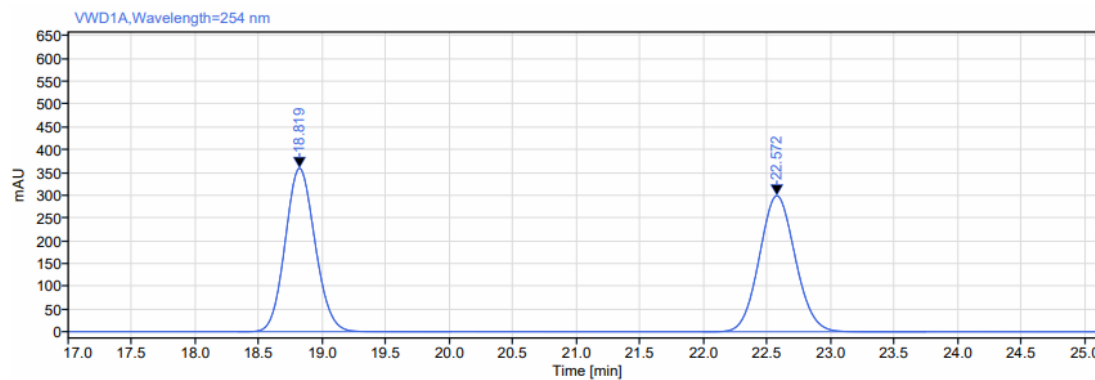

Signal: VWD1A, Wavelength=254 nm

| RT [min] | Type | Area     | Height | Area% |
|----------|------|----------|--------|-------|
| 18.819   | BB   | 5855.46  | 358.78 | 50.02 |
| 22.572   | BB   | 5851.68  | 298.48 | 49.98 |
|          | Sum  | 11707.14 |        |       |

HPLC trace of enantioenriched-**3aa** obtained in a 0.004 mmol reaction:

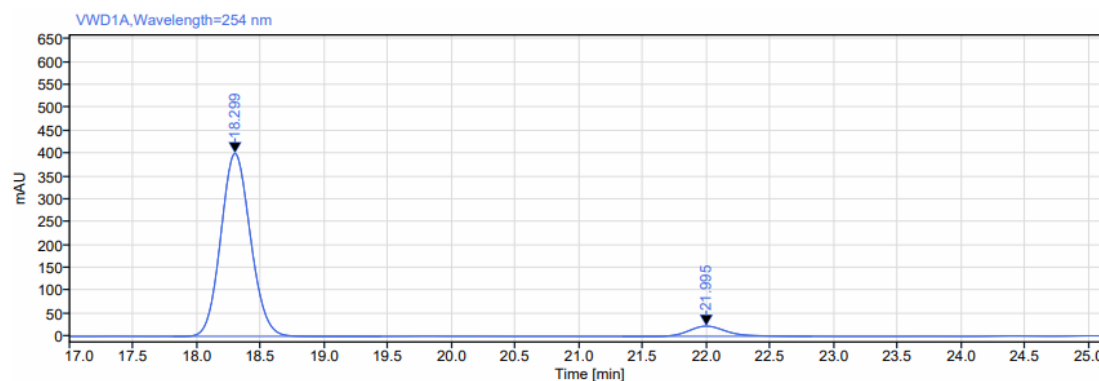

Signal: VWD1A, Wavelength=254 nm

| RT [min] | Type | Area    | Height | Area% |
|----------|------|---------|--------|-------|
| 18.299   | BB   | 6468.90 | 400.32 | 93.39 |
| 21.995   | BM m | 458.17  | 22.40  | 6.61  |
|          | Sum  | 6927.07 |        |       |

*Rac-3aa* is a colorless oil (198 mg, 72%). The NMR spectra of *rac-3aa* match the one previously reported<sup>39</sup>.

**<sup>1</sup>H NMR (400 MHz, CDCl<sub>3</sub>)**  $\delta$  7.91-7.83 (m, 2H), 7.37-7.30 (m, 2H), 7.20-7.12 (m, 2H), 6.86-6.79 (m, 2H), 4.56 (q, *J* = 6.8 Hz, 1H), 3.75 (s, 3H), 1.49 (d, *J* = 6.8 Hz, 3H).

**<sup>13</sup>C NMR (100 MHz, CDCl<sub>3</sub>)**  $\delta$  199.2, 158.6, 139.0, 134.8, 133.1, 130.2, 128.74, 128.69, 114.5, 55.2, 47.2, 19.4.

**MS (EI, *m/z*)** calcd. for C<sub>16</sub>H<sub>15</sub>ClO<sub>2</sub> [M]<sup>+</sup> 274.1, found: 274.1.

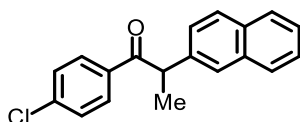

### 1-(4-Chlorophenyl)-2-(naphthalen-2-yl)propan-1-one (**3ab**)

By using the typical procedure described in Section 4, the reaction of 4-chlorobenzaldehyde **1a** (0.004 mmol) and ethylbenzene **2k** (0.016 mmol) catalysed by **RAT<sub>CH</sub>** (2 mol%) afforded **3ab** in 26% **GC yield** (average of duplicate runs), with a 85% ee.

GC calibration curve for **3ab** is displayed below.

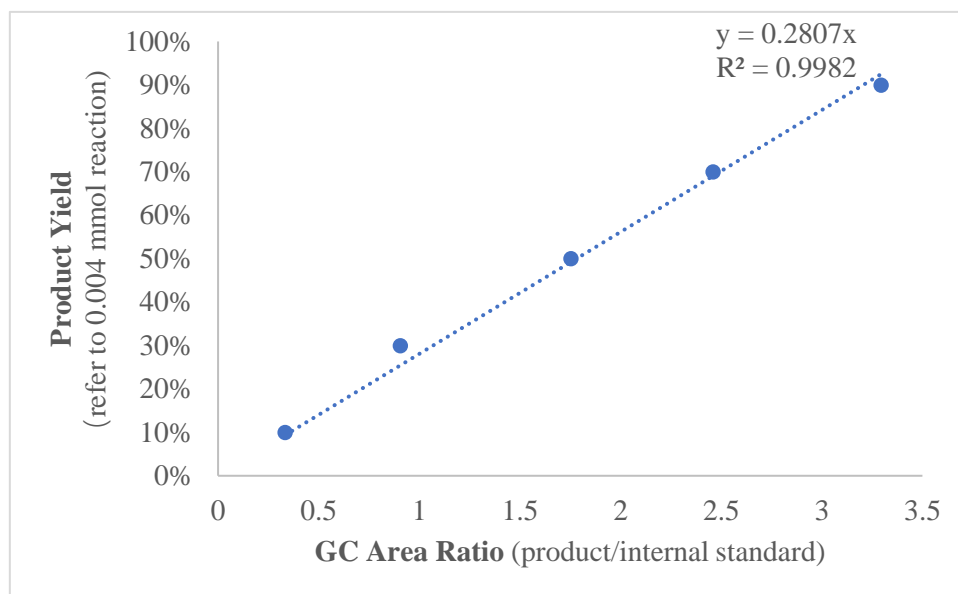

**Enantiomeric excess** was established by HPLC analysis using a Chiralpak AS-H column (HPLC: AS-H, 254 nm, *n*-hexane/isopropanol = 95:5, flow rate 0.5 mL/min, 30 °C,  $t_r$  (major) = 11.75 min,  $t_r$  (minor) = 13.57 min).

HPLC trace of *rac*-**3ab**:

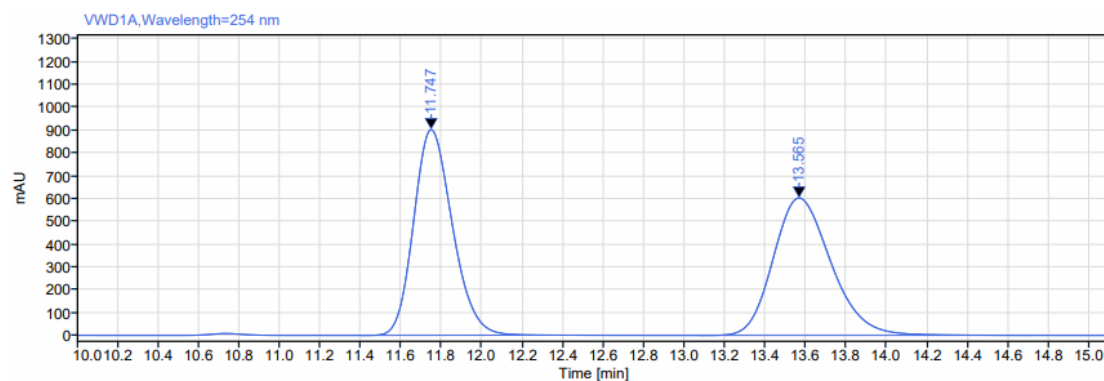

Signal: VWD1A,Wavelength=254 nm

| RT [min] | Type | Area     | Height | Area% |
|----------|------|----------|--------|-------|
| 11.747   | BM m | 11996.01 | 902.27 | 50.09 |
| 13.565   | MM m | 11952.43 | 602.63 | 49.91 |
| Sum      |      | 23948.44 |        |       |

HPLC trace of enantioenriched-**3ab** obtained in a 0.004 mmol reaction:

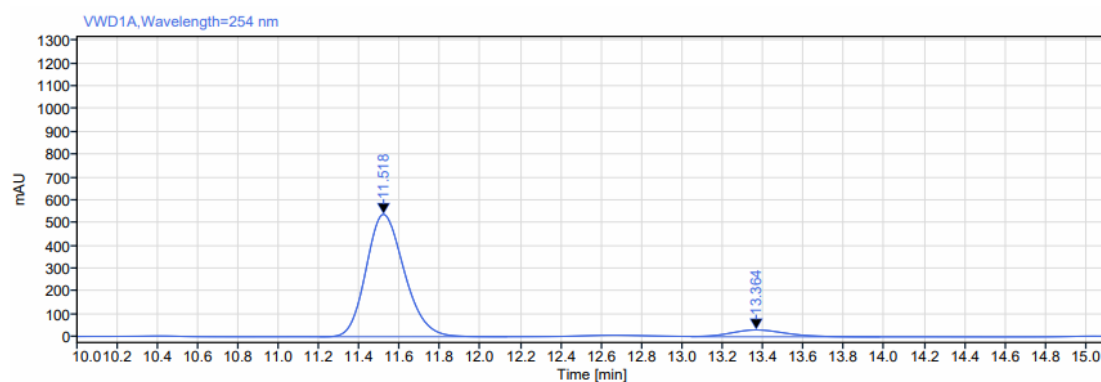

Signal: VWD1A,Wavelength=254 nm

| RT [min] | Type | Area    | Height | Area% |
|----------|------|---------|--------|-------|
| 11.518   | BB   | 7056.39 | 537.29 | 92.54 |
| 13.364   | VB   | 568.47  | 30.11  | 7.46  |
|          | Sum  | 7624.86 |        |       |

*Rac-3ab* is a white solid (259 mg, 59%). The NMR spectra of *rac-3ab* match the one previously reported<sup>40</sup>.

<sup>1</sup>H NMR (400 MHz, CDCl<sub>3</sub>)  $\delta$  7.94-7.87 (m, 2H), 7.82-7.73 (m, 3H), 7.68 (d,  $J$  = 1.8 Hz, 1H), 7.47-7.40 (m, 2H), 7.38 (dd,  $J$  = 8.5, 1.9 Hz, 1H), 7.35-7.28 (m, 2H), 4.77 (q,  $J$  = 6.8 Hz, 1H), 1.60 (d,  $J$  = 6.8 Hz, 3H).

<sup>13</sup>C NMR (100 MHz, CDCl<sub>3</sub>)  $\delta$  199.0, 139.2, 138.7, 134.7, 133.7, 132.4, 130.2, 129.0, 128.8, 127.7, 127.6, 126.4, 126.3, 125.9, 125.7, 48.2, 19.4.

MS (EI,  $m/z$ ) calcd. for C<sub>19</sub>H<sub>15</sub>ClO [M]<sup>+</sup> 294.1, found: 294.1.

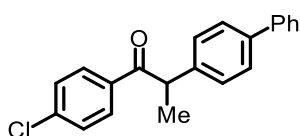

### 2-([1,1'-Biphenyl]-4-yl)-1-(4-chlorophenyl)propan-1-one (**3ac**)

By using the typical procedure described in Section 4, the reaction of 4-chlorobenzaldehyde **1a** (0.004 mmol) and 4-ethyl-1,1'-biphenyl **2l** (0.016 mmol) catalysed by RAT<sub>CH</sub> (2 mol%) afforded **3ac** in 23% GC yield (average of duplicate runs), with a 80% ee.

GC calibration curve for **3ac** is displayed below.

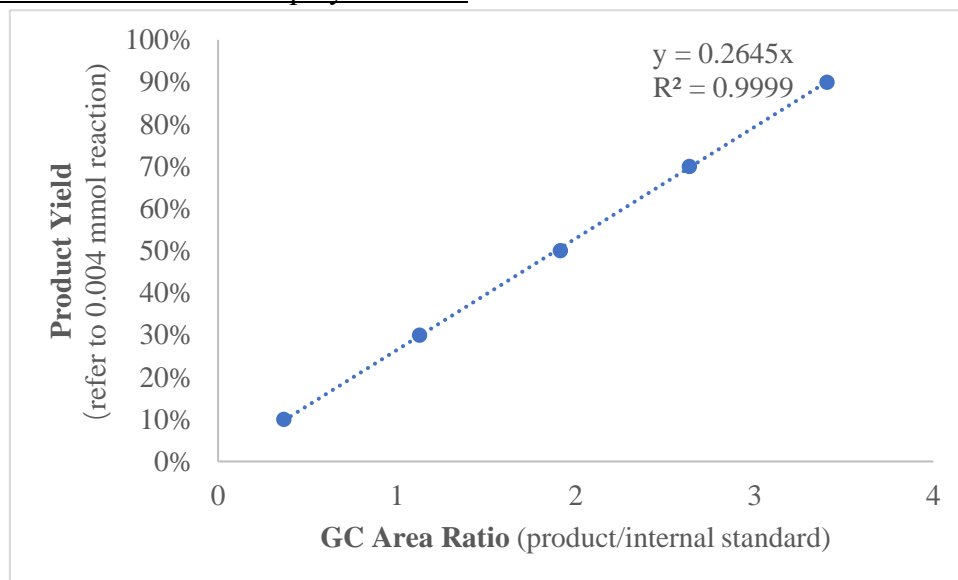

**Enantiomeric excess** was established by HPLC analysis using a Chiralpak AS-H column (HPLC: AS-H, 254 nm, *n*-hexane/isopropanol = 95:5, flow rate 0.5 mL/min, 30 °C,  $t_r$  (major) = 11.31 min,  $t_r$  (minor) = 12.61 min).

### HPLC trace of *rac*-**3ac**:

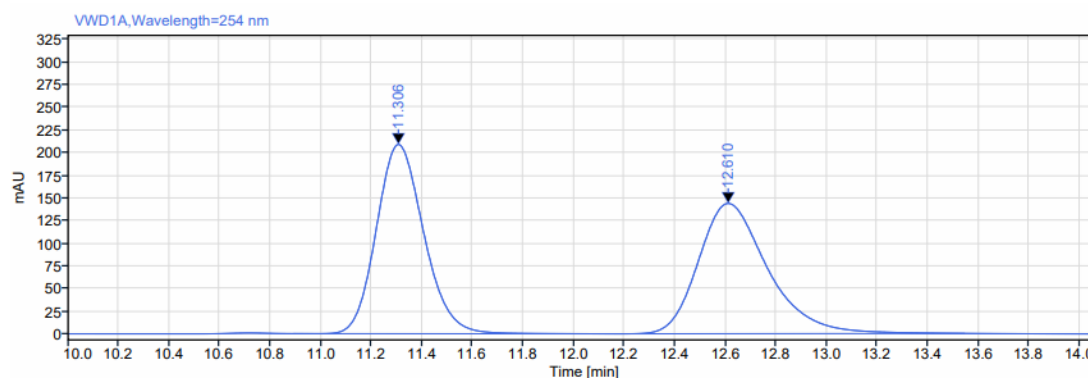

| Signal: VWD1A, Wavelength=254 nm |      |         |        |       |
|----------------------------------|------|---------|--------|-------|
| RT [min]                         | Type | Area    | Height | Area% |
| 11.306                           | MB m | 2719.84 | 208.86 | 49.86 |
| 12.610                           | BM m | 2735.13 | 143.78 | 50.14 |
|                                  | Sum  | 5454.97 |        |       |

### HPLC trace of enantioenriched-**3ac** obtained in a 0.004 mmol reaction:

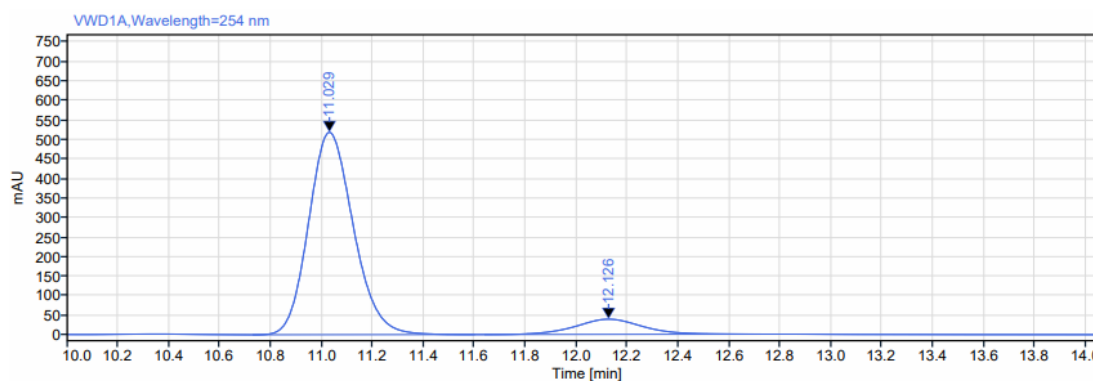

| Signal: VWD1A, Wavelength=254 nm |      |         |        |       |
|----------------------------------|------|---------|--------|-------|
| RT [min]                         | Type | Area    | Height | Area% |
| 11.029                           | BB   | 6334.50 | 518.48 | 89.88 |
| 12.126                           | BB   | 713.47  | 38.83  | 10.12 |
|                                  | Sum  | 7047.97 |        |       |

*Rac*-**3ac** is a white solid (564 mg, 88%).

<sup>1</sup>H NMR (400 MHz, CDCl<sub>3</sub>)  $\delta$  7.94-7.86 (m, 2H), 7.56-7.48 (m, 4H), 7.44-7.27 (m, 7H), 4.65 (q, *J* = 6.8 Hz, 1H), 1.56 (d, *J* = 6.9 Hz, 3H).

<sup>13</sup>C NMR (100 MHz, CDCl<sub>3</sub>)  $\delta$  199.0, 140.5, 140.1, 140.0, 139.2, 134.7, 130.2, 128.8, 128.7, 128.1, 127.8, 127.3, 127.0, 47.6, 19.4.

HRMS (ESI, *m/z*) calcd. for C<sub>21</sub>H<sub>18</sub>ClO [M+H]<sup>+</sup> 321.1041, found: 321.1041.

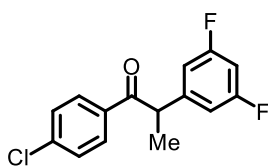

### 1-(4-Chlorophenyl)-2-(3,5-difluorophenyl)propan-1-one (**3ad**)

By using the typical procedure described in Section 4, the reaction of 4-chlorobenzaldehyde **1a** (0.004 mmol) and 1-ethyl-3,5-difluorobenzene **2m** (0.016 mmol) catalysed by **RAT<sub>CH</sub>** (2 mol%) afforded



**3ad** in 45% GC yield (average of duplicate runs), with a 89% ee.

GC calibration curve for **3ad** is displayed below.

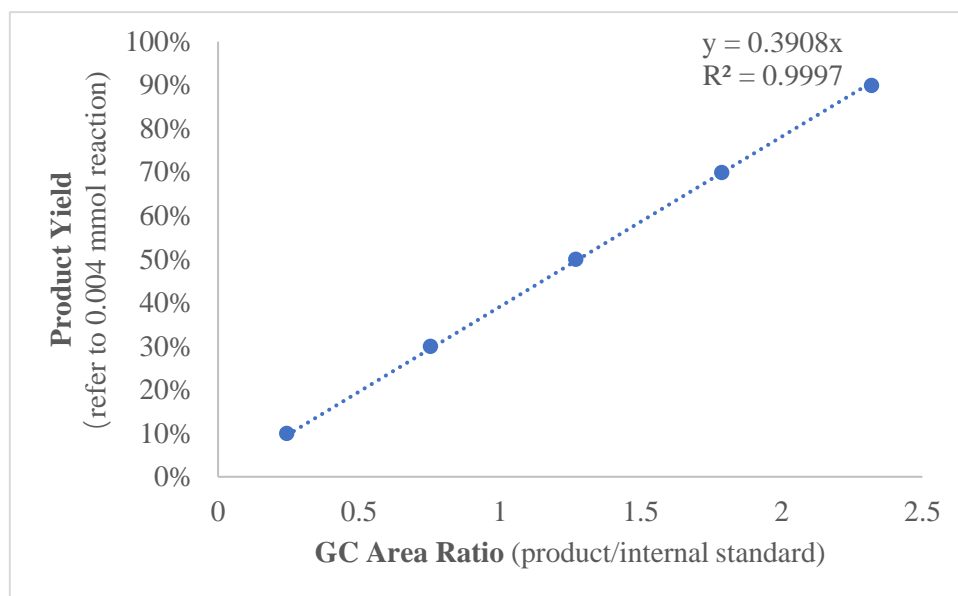

**Enantiomeric excess** was established by HPLC analysis using a Chiralcel OJ-3 column (HPLC: OJ-3, 254 nm, *n*-hexane/isopropanol = 95:5, flow rate 0.5 mL/min, 30 °C,  $t_r$  (major) = 14.69 min,  $t_r$  (minor) = 18.00 min).

HPLC trace of *rac*-**3ad**:

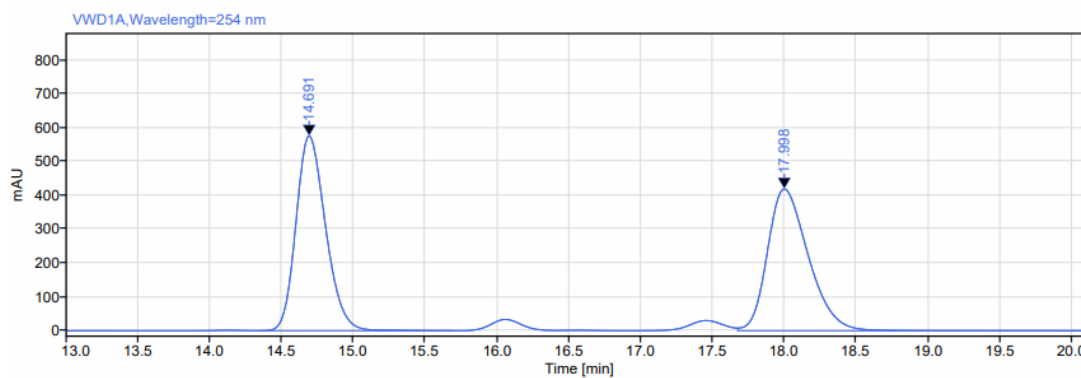

| Signal: VWD1A, Wavelength=254 nm |      |          |        |       |
|----------------------------------|------|----------|--------|-------|
| RT [min]                         | Type | Area     | Height | Area% |
| 14.691                           | VB   | 8266.09  | 576.42 | 49.94 |
| 17.998                           | VB   | 8285.81  | 419.57 | 50.06 |
|                                  | Sum  | 16551.90 |        |       |

HPLC trace of enantioenriched-**3ad** obtained in a 0.004 mmol reaction:

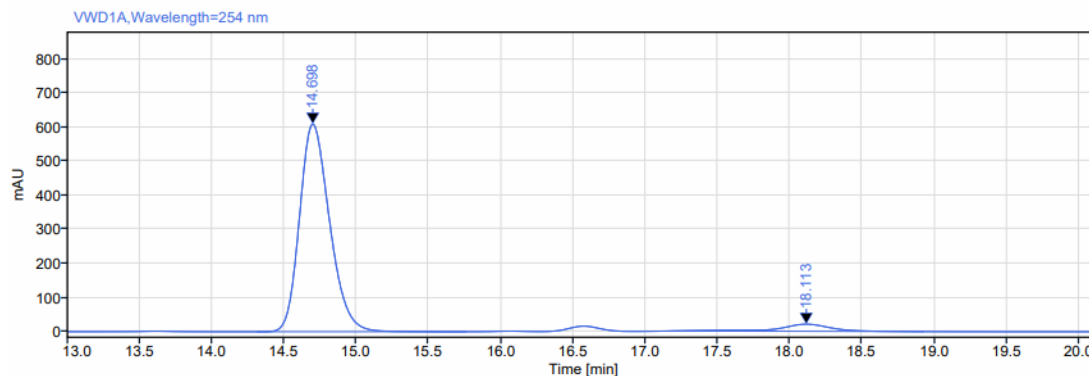

Signal: VWD1A, Wavelength=254 nm

| RT [min] | Type | Area    | Height | Area% |
|----------|------|---------|--------|-------|
| 14.698   | BB   | 8817.32 | 609.92 | 94.38 |
| 18.113   | MM m | 525.16  | 20.84  | 5.62  |
|          | Sum  | 9342.48 |        |       |

*Rac*-**3ad** is a pale-yellow oil (223 mg, 69%).

**<sup>1</sup>H NMR (400 MHz, CDCl<sub>3</sub>)**  $\delta$  7.90-7.83 (m, 2H), 7.43-7.35 (m, 2H), 6.84-6.75 (m, 2H), 6.71-6.61 (m, 1H), 4.60 (q, *J* = 6.8 Hz, 1H), 1.52 (d, *J* = 6.9 Hz, 3H).

**<sup>13</sup>C NMR (100 MHz, CDCl<sub>3</sub>)**  $\delta$  197.7, 163.3 (dd, *J* = 248.0, 12.9 Hz), 144.7 (t, *J* = 8.8 Hz), 139.7, 134.2, 130.0, 129.0, 110.7 (dd, *J* = 18.4 Hz, 7.1 Hz), 102.7 (t, *J* = 25.1 Hz), 47.3 (t, *J* = 1.9 Hz), 19.1.

**HRMS** (ESI, *m/z*) calcd. for C<sub>15</sub>H<sub>12</sub>ClF<sub>2</sub>O [M+H]<sup>+</sup> 281.0539, found: 281.0539.

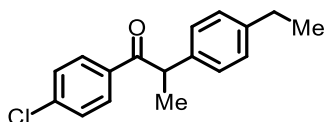

### 1-(4-Chlorophenyl)-2-(4-ethylphenyl)propan-1-one (**3ae**)

By using the typical procedure described in Section 4, the reaction of 4-chlorobenzaldehyde **1a** (0.004 mmol) and 1,4-diethylbenzene **2n** (0.016 mmol) catalysed by **RAT<sub>CH</sub>** (2 mol%) afforded **3ae** in 59% **GC yield** (average of duplicate runs), with a 83% ee.

GC calibration curve for **3ae** is displayed below.

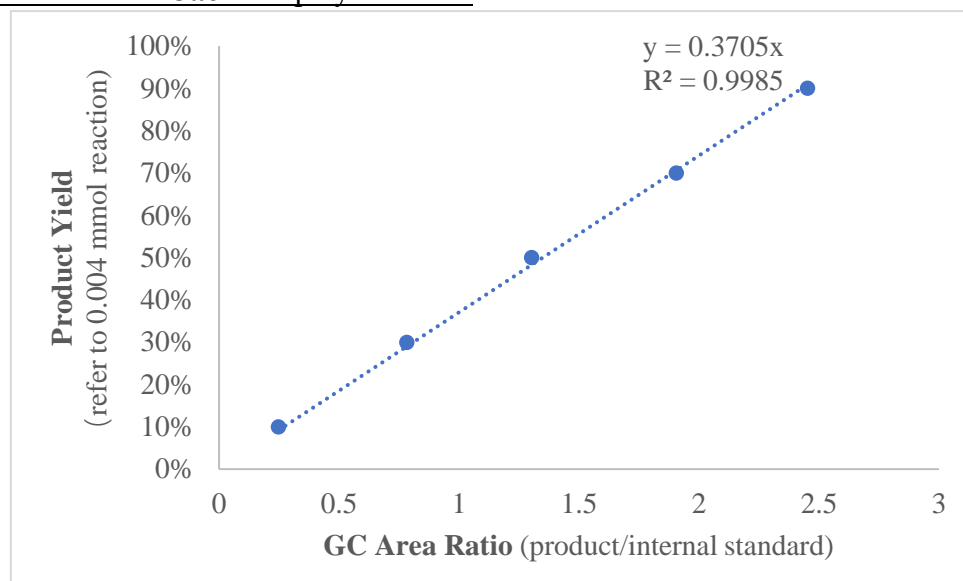

**Enantiomeric excess** was established by HPLC analysis using a Chiralpak AS-H column (HPLC: AS-H, 254 nm, *n*-hexane/isopropanol = 95:5, flow rate 0.5 mL/min, 30 °C,  $t_r$  (major) = 8.40 min,  $t_r$  (minor) = 8.82 min).

HPLC trace of *rac*-**3ae**:

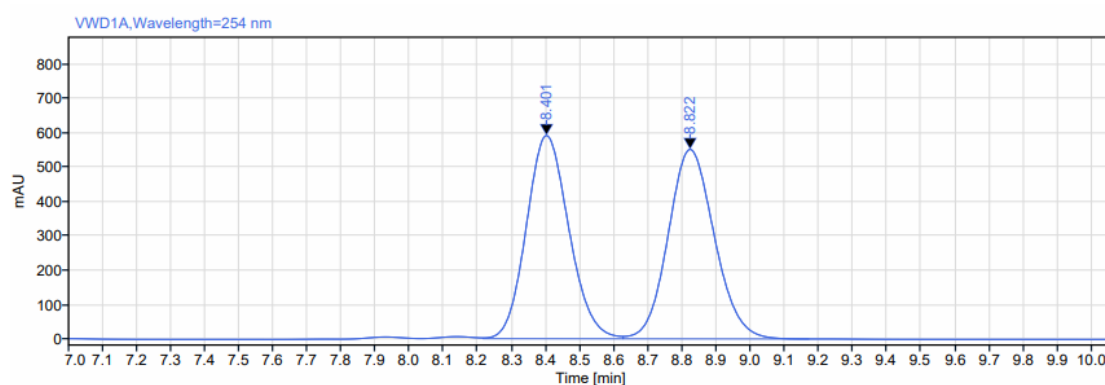

Signal: VWD1A, Wavelength=254 nm

| RT [min] | Type | Area     | Height | Area% |
|----------|------|----------|--------|-------|
| 8.401    | VV   | 5123.89  | 591.61 | 49.64 |
| 8.822    | VB   | 5198.98  | 551.62 | 50.36 |
|          | Sum  | 10322.87 |        |       |

HPLC trace of enantioenriched-**3ae** obtained in a 0.004 mmol reaction:

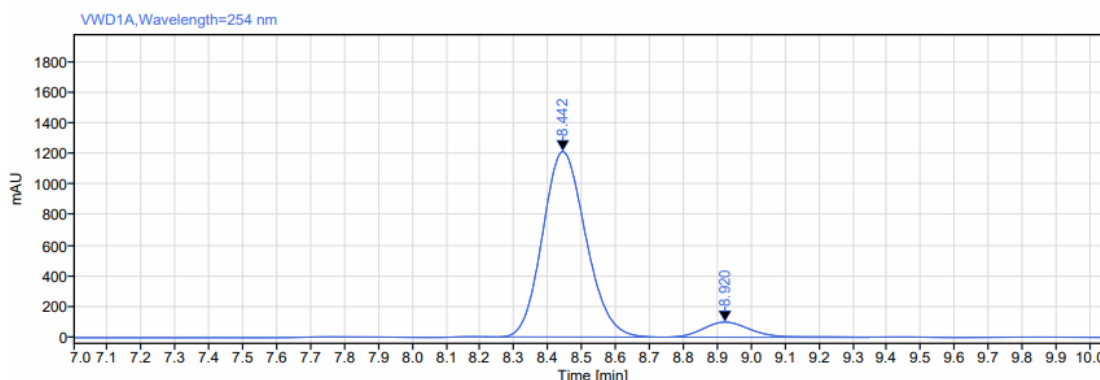

Signal: VWD1A, Wavelength=254 nm

| RT [min] | Type | Area     | Height  | Area% |
|----------|------|----------|---------|-------|
| 8.442    | MM m | 10722.69 | 1211.23 | 91.58 |
| 8.920    | MV m | 985.93   | 99.10   | 8.42  |
|          | Sum  | 11708.62 |         |       |

*Rac*-**3ae** is a colorless oil (105 mg, 48%).

**<sup>1</sup>H NMR (400 MHz, CDCl<sub>3</sub>)**  $\delta$  7.91-7.84 (m, 2H), 7.36-7.29 (m, 2H), 7.19-7.09 (m, 4H), 4.58 (q, *J* = 6.8 Hz, 1H), 2.58 (q, *J* = 7.6 Hz, 2H), 1.50 (d, *J* = 6.8 Hz, 3H), 1.19 (t, *J* = 7.6 Hz, 3H).

**<sup>13</sup>C NMR (100 MHz, CDCl<sub>3</sub>)**  $\delta$  199.1, 142.9, 139.0, 138.3, 134.8, 130.2, 128.7, 128.5, 127.5, 47.6, 28.3, 19.4, 15.3.

**HRMS** (ESI, *m/z*) calcd. for C<sub>17</sub>H<sub>18</sub>ClO [M+H]<sup>+</sup> 273.1041, found: 273.1037.

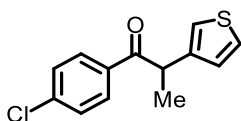

### 1-(4-Chlorophenyl)-2-(thiophen-3-yl)propan-1-one (**3af**)

By using the typical procedure described in Section 4, the reaction of 4-chlorobenzaldehyde **1a** (0.004 mmol) and 3-ethylthiophene **2o** (0.016 mmol) catalysed by **RAT<sub>CH</sub>** (2 mol%) afforded **3af** in 74% **GC yield** (average of duplicate runs), with a 85% ee.

GC calibration curve for **3af** is displayed below.

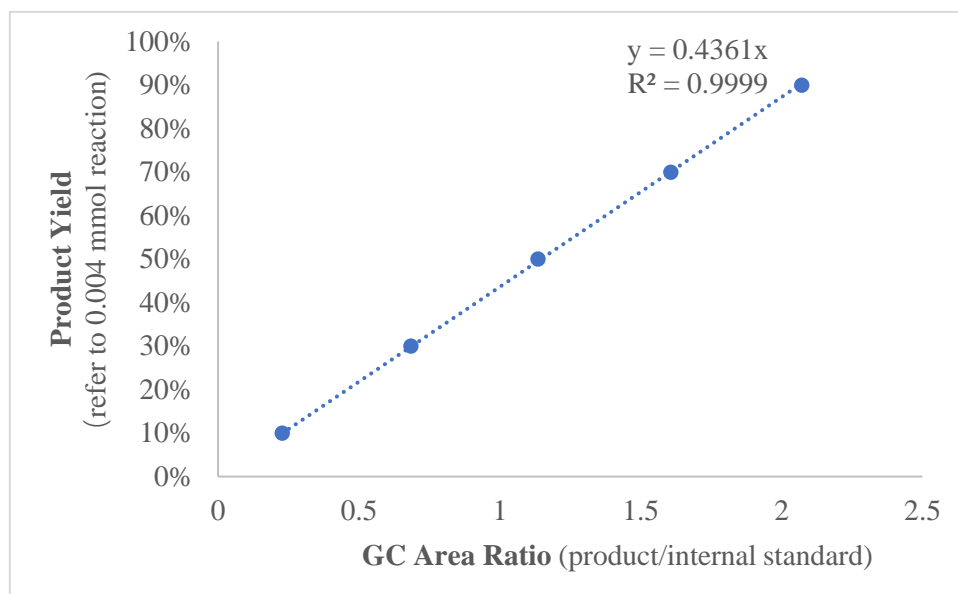

**Enantiomeric excess** was established by HPLC analysis using a Chiralcel OJ-H column (HPLC: OJ-H, 254 nm, *n*-hexane/isopropanol = 95:5, flow rate 0.5 mL/min, 30 °C,  $t_r$  (major) = 22.23 min,  $t_r$  (minor) = 27.89 min).

HPLC trace of *rac*-**3af**:

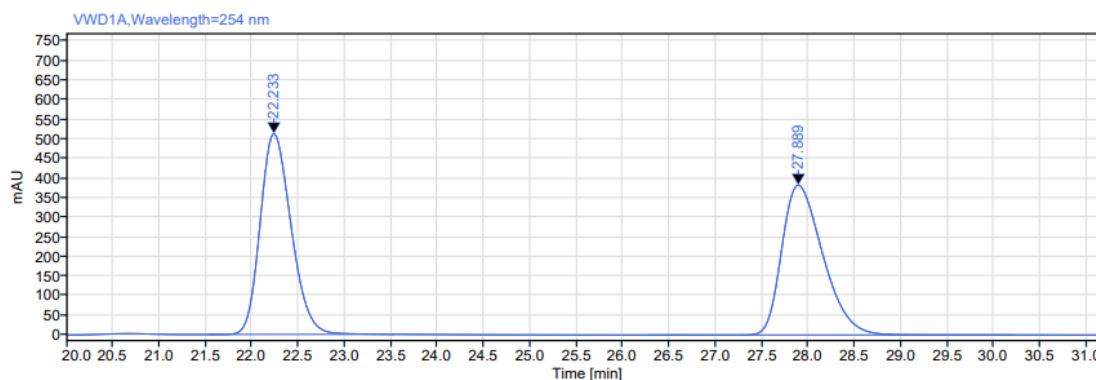

Signal: VWD1A,Wavelength=254 nm

| RT [min] | Type | Area     | Height | Area% |
|----------|------|----------|--------|-------|
| 22.233   | MM m | 11901.19 | 512.65 | 50.17 |
| 27.889   | MB m | 11822.45 | 382.88 | 49.83 |
|          | Sum  | 23723.63 |        |       |

HPLC trace of enantioenriched-**3af** obtained in a 0.004 mmol reaction:

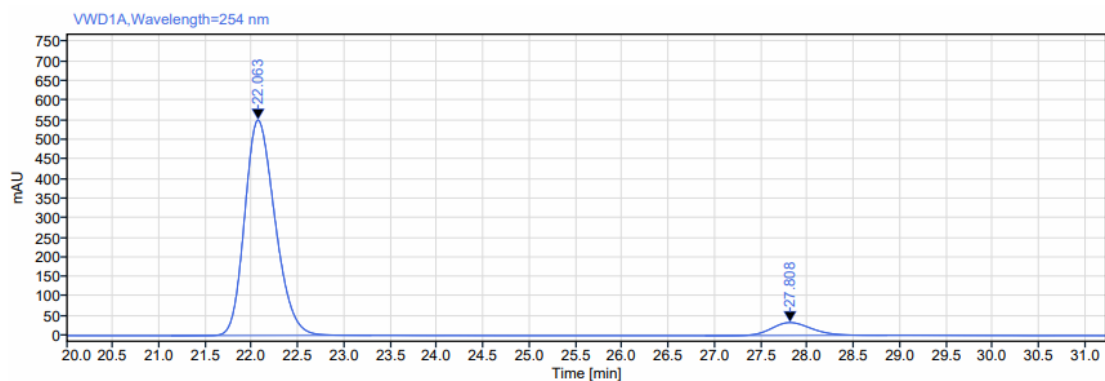

Signal: VWD1A, Wavelength=254 nm

| RT [min] | Type | Area     | Height | Area% |
|----------|------|----------|--------|-------|
| 22.063   | BM m | 12533.40 | 550.14 | 92.67 |
| 27.808   | BM m | 990.85   | 33.07  | 7.33  |
|          | Sum  | 13524.24 |        |       |

The reaction was scaled up to 0.1 mmol, which afforded 18.0 mg **3af** in 72% isolated yield with a 82% ee.

**<sup>1</sup>H NMR (400 MHz, CDCl<sub>3</sub>) of enantioenriched-**3af** obtained in a 0.1 mmol reaction:**

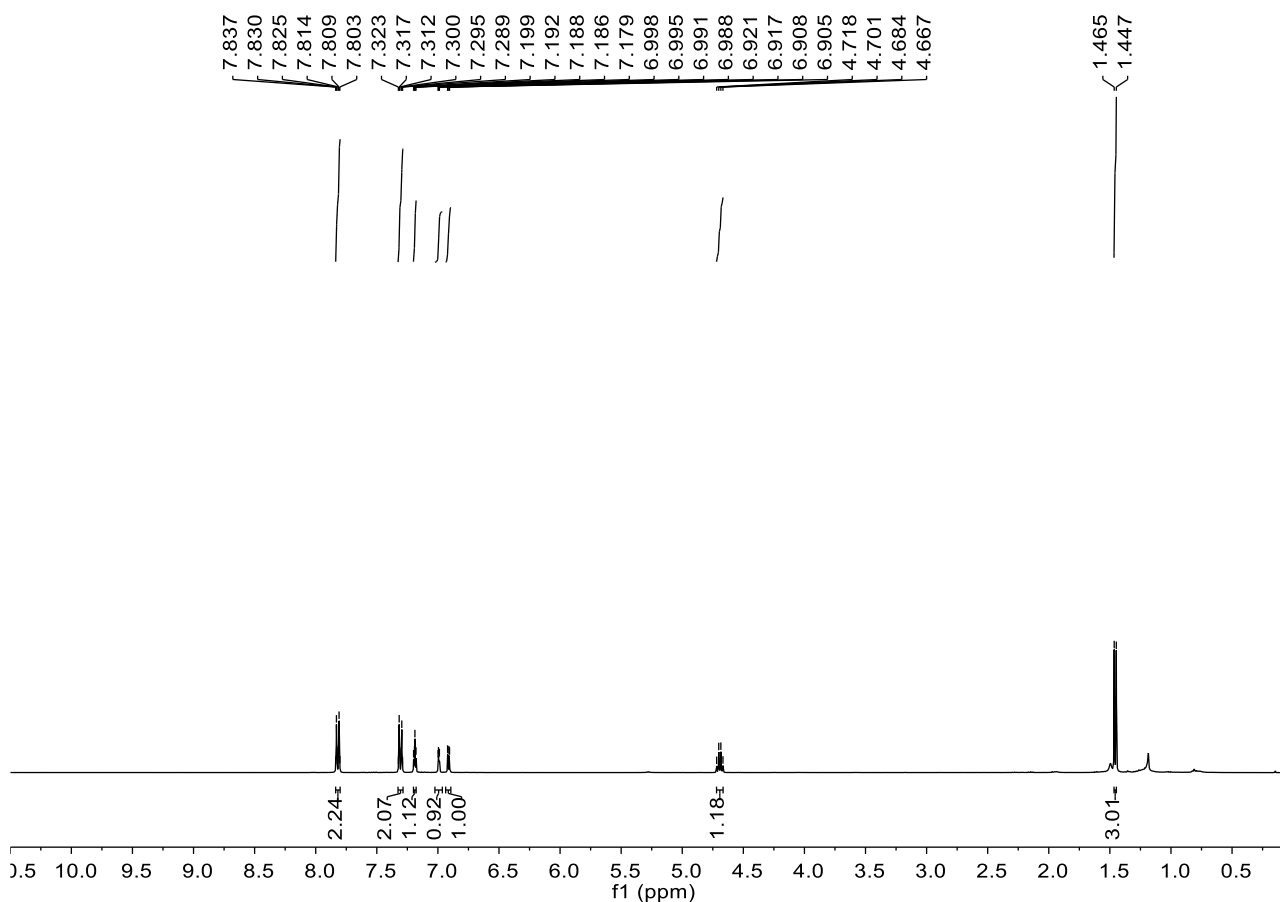

**Enantiomeric excess** was established by HPLC analysis using a Chiralcel OJ-H column (HPLC: OJ-H, 254 nm, *n*-hexane/isopropanol = 95:5, flow rate 0.5 mL/min, 30 °C,  $t_r$  (major) = 22.12 min,  $t_r$  (minor) = 27.32 min).

**HPLC trace of *rac*-3af:**

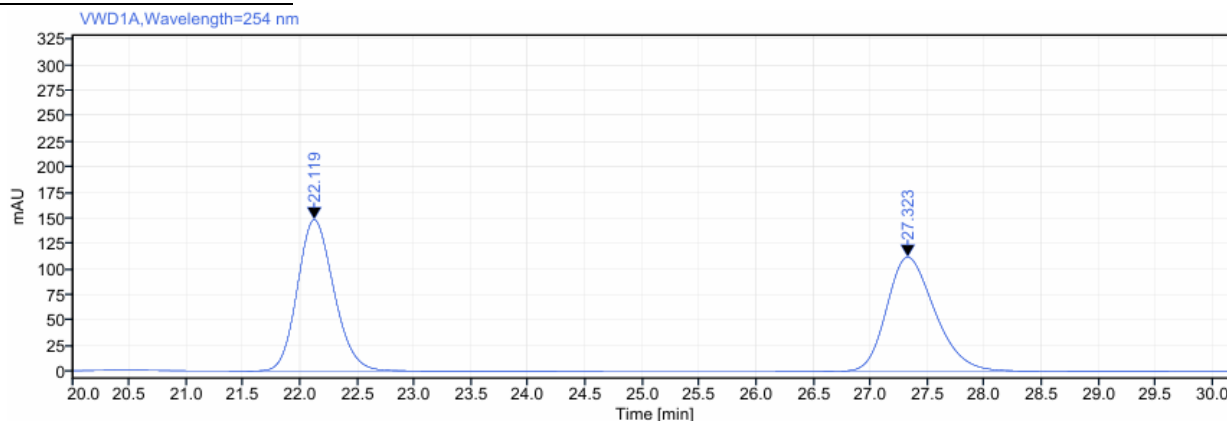

Signal: VWD1A,Wavelength=254 nm

| RT [min] | Type | Area    | Height | Area% |
|----------|------|---------|--------|-------|
| 22.119   | BB   | 3287.96 | 148.09 | 50.07 |
| 27.323   | BB   | 3278.33 | 111.72 | 49.93 |
|          | Sum  | 6566.29 |        |       |

**HPLC trace of 3af** obtained in a 0.1 mmol reaction:

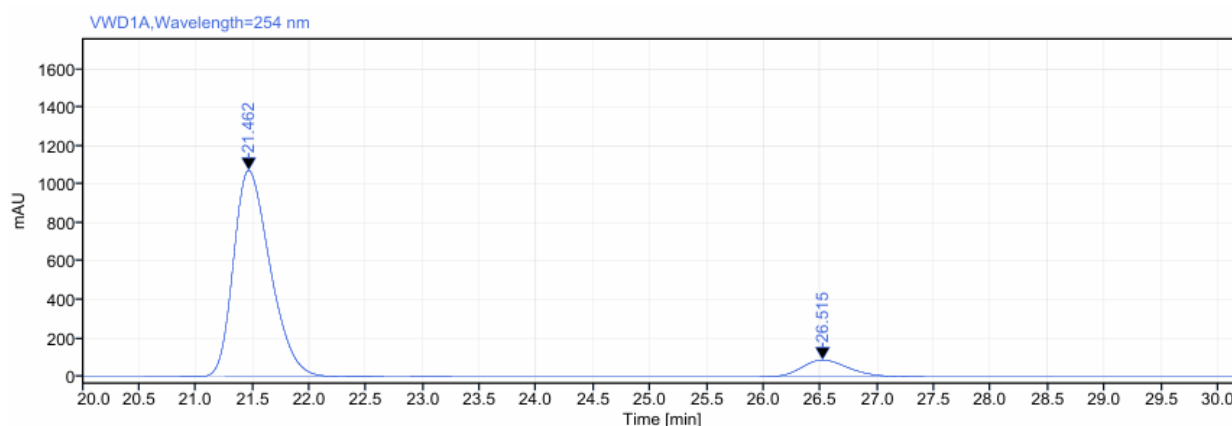

Signal: VWD1A,Wavelength=254 nm

| RT [min] | Type | Area     | Height  | Area% |
|----------|------|----------|---------|-------|
| 21.462   | BM m | 24148.50 | 1074.48 | 90.81 |
| 26.515   | MM m | 2445.07  | 86.84   | 9.19  |
|          | Sum  | 26593.57 |         |       |

*Rac*-3af is a white solid (168 mg, 78%).

**<sup>1</sup>H NMR (400 MHz, CDCl<sub>3</sub>)**  $\delta$  7.93-7.85 (m, 2H), 7.41-7.34 (m, 2H), 7.29-7.23 (m, 1H), 7.06 (dd,  $J$  = 3.0, 1.3 Hz, 1H), 6.98 (dd,  $J$  = 4.9, 1.3 Hz, 1H), 4.76 (q,  $J$  = 6.9 Hz, 1H), 1.53 (d,  $J$  = 6.8 Hz, 3H).

**<sup>13</sup>C NMR (100 MHz, CDCl<sub>3</sub>)**  $\delta$  198.8, 141.1, 139.3, 134.6, 130.1, 128.8, 126.9, 126.3, 121.5, 43.0, 18.8.

**HRMS** (ESI,  $m/z$ ) calcd. for C<sub>13</sub>H<sub>12</sub>ClOS [M+H]<sup>+</sup> 251.0292, found: 251.0291.

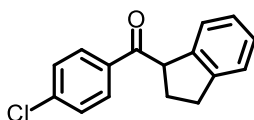

**1-(4-Chlorophenyl)-2-(2,3-dihydro-1*H*-inden-1-yl)propan-1-one (3ag)**

By using the typical procedure described in Section 4, the reaction of 4-chlorobenzaldehyde **1a** (0.004 mmol) and 2,3-dihydro-1*H*-indene **2p** (0.016 mmol) catalysed by **RAT2** (2 mol%) afforded **3ag** in 49% GC yield (average of duplicate runs), with a 34% ee.

GC calibration curve for **3ag** is displayed below.

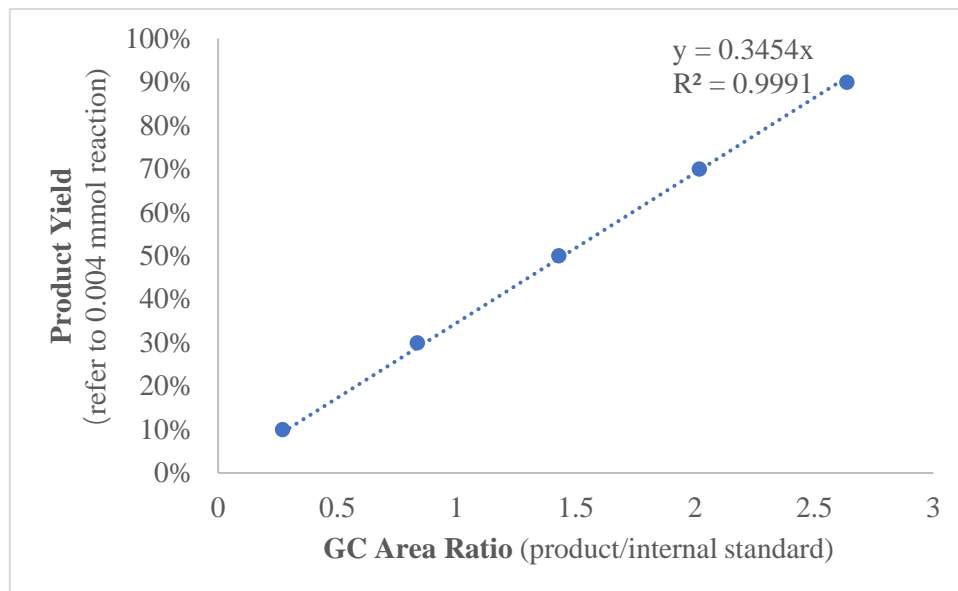

**Enantiomeric excess** was established by HPLC analysis using a Chiralpak AS-H column (HPLC: AS-H, 254 nm, *n*-hexane/isopropanol = 95:5, flow rate 0.5 mL/min, 30 °C,  $t_r$  (major) = 12.10 min,  $t_r$  (minor) = 14.73 min).



### HPLC trace of *rac*-**3ag**:

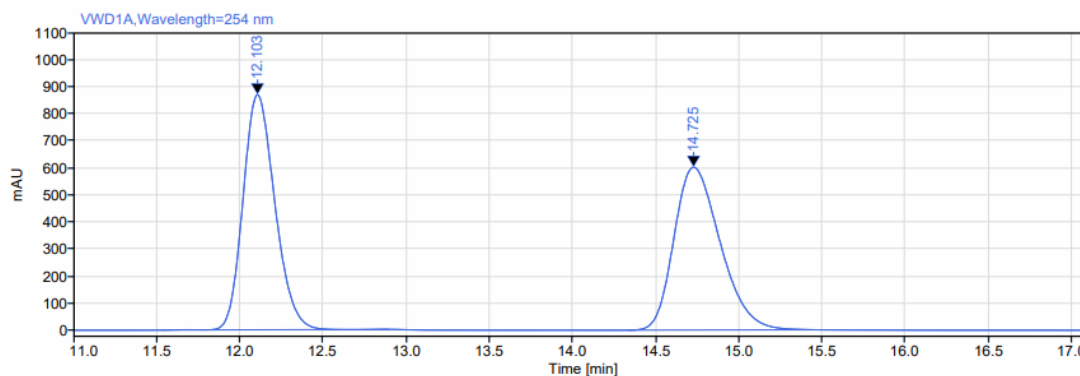

Signal: VWD1A, Wavelength=254 nm

| RT [min] | Type | Area     | Height | Area% |
|----------|------|----------|--------|-------|
| 12.103   | MM m | 11558.18 | 868.48 | 49.88 |
| 14.725   | MM m | 11614.04 | 601.70 | 50.12 |
|          | Sum  | 23172.22 |        |       |

### HPLC trace of enantioenriched-**3ag** obtained in a 0.004 mmol reaction:

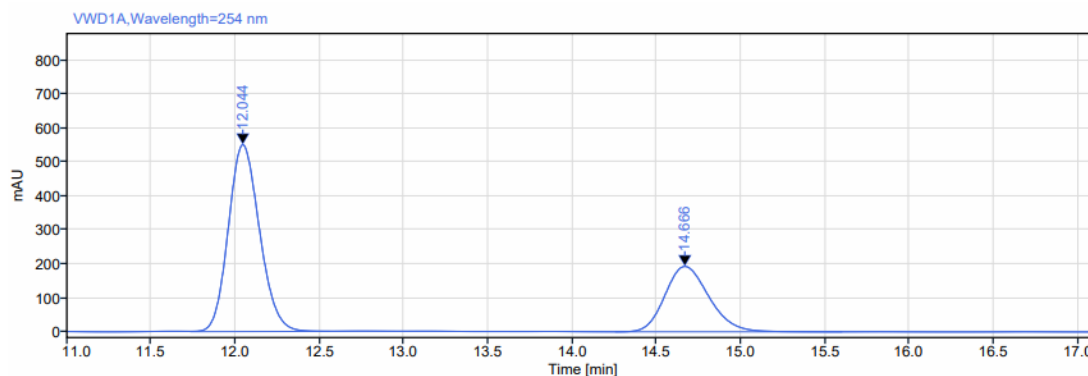

Signal: VWD1A, Wavelength=254 nm

| RT [min] | Type | Area     | Height | Area% |
|----------|------|----------|--------|-------|
| 12.044   | VV   | 7094.98  | 550.61 | 66.98 |
| 14.666   | BB   | 3498.39  | 192.73 | 33.02 |
|          | Sum  | 10593.37 |        |       |

*Rac*-**3ag** is a white solid (956 mg, 73%). The NMR spectra of *rac*-**3ag** match the one previously reported<sup>41</sup>.

**<sup>1</sup>H NMR (400 MHz, CDCl<sub>3</sub>)**  $\delta$  8.02-7.94 (m, 2H), 7.51-7.44 (m, 2H), 7.28-7.24 (m, 1H), 7.23-7.15 (m, 1H), 7.14-7.06 (m, 1H), 7.03 (d,  $J$  = 7.6 Hz, 1H), 4.97 (t,  $J$  = 7.5 Hz, 1H), 3.21-3.09 (m, 1H), 3.06-2.94 (m, 1H), 2.55-2.37 (m, 2H).

**<sup>13</sup>C NMR (100 MHz, CDCl<sub>3</sub>)**  $\delta$  199.1, 144.5, 141.1, 139.6, 135.3, 130.3, 129.0, 127.4, 126.3, 124.88, 124.86, 52.5, 31.9, 29.5.

**MS** (EI,  $m/z$ ) calcd. for C<sub>16</sub>H<sub>13</sub>ClO [M]<sup>+</sup> 256.0, found: 256.0.

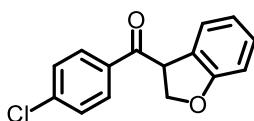

### 1-(4-Chlorophenyl)-2-(2,3-dihydrobenzofuran-3-yl)propan-1-one (**3ah**)

By using the typical procedure described in Section 4, the reaction of 4-chlorobenzaldehyde **1a** (0.004

mmol) and 2,3-dihydrobenzofuran **2q** (0.016 mmol) catalysed by **RAT<sub>CH</sub>** (2 mol%) afforded **3ah** in 43% GC yield (average of duplicate runs), with a 0% ee.

GC calibration curve for **3ah** is displayed below.

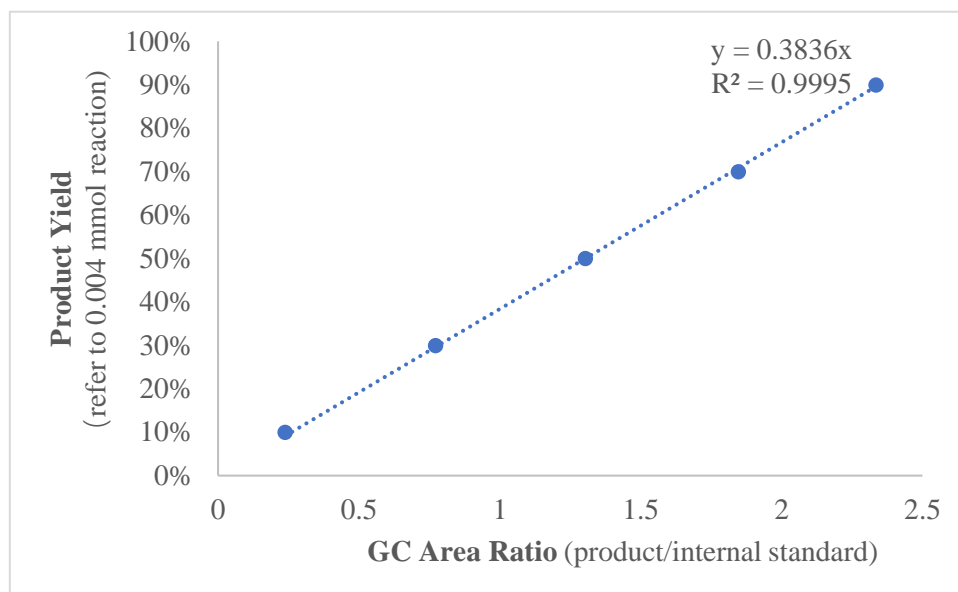

**Enantiomeric excess** was established by HPLC analysis using a Chiralpak AS-H column (HPLC: AS-H, 254 nm, *n*-hexane/isopropanol = 95:5, flow rate 0.5 mL/min, 30 °C,  $t_{r1}$  = 21.02 min,  $t_{r2}$  = 27.63 min).

HPLC trace of *rac*-**3ah**:

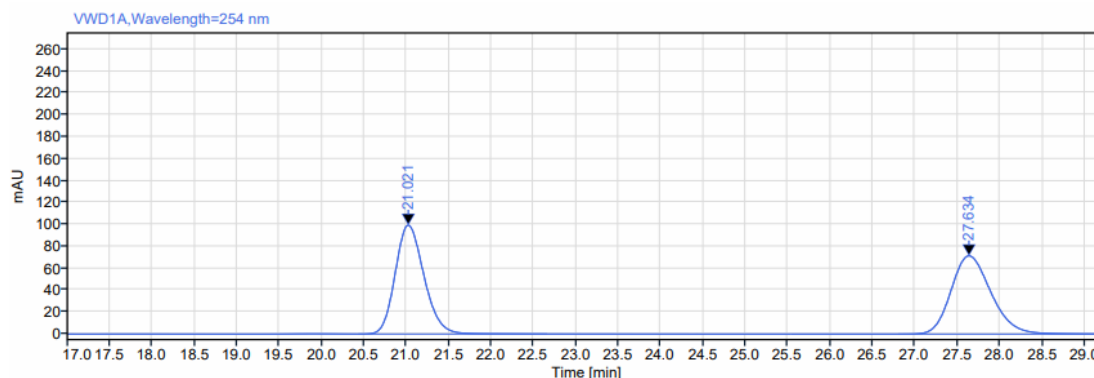

Signal: VWD1A, Wavelength=254 nm

| RT [min] | Type | Area    | Height | Area% |
|----------|------|---------|--------|-------|
| 21.021   | BB   | 2350.96 | 99.46  | 50.02 |
| 27.634   | BB   | 2349.31 | 71.50  | 49.98 |
|          | Sum  | 4700.27 |        |       |

HPLC trace of enantioenriched-**3ah** obtained in a 0.004 mmol reaction:

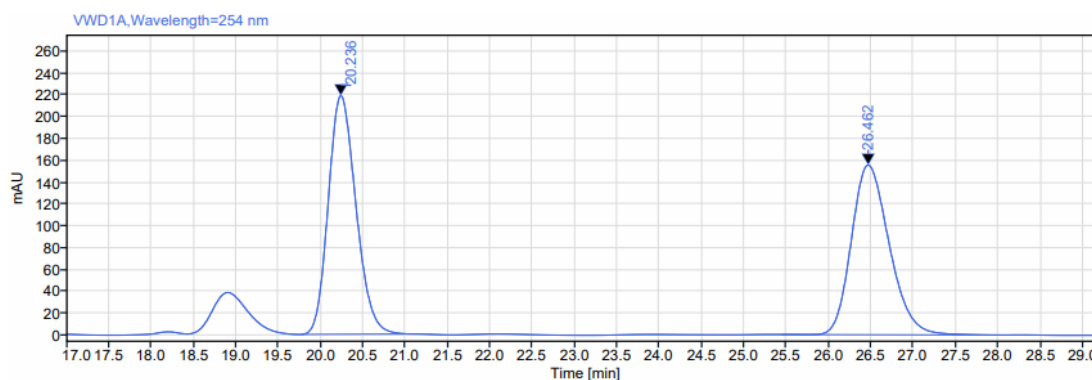

Signal: VWD1A,Wavelength=254 nm

| RT [min] | Type | Area    | Height | Area% |
|----------|------|---------|--------|-------|
| 20.236   | MM m | 4950.54 | 218.30 | 50.67 |
| 26.462   | MM m | 4820.30 | 155.30 | 49.33 |
|          | Sum  | 9770.84 |        |       |

*Rac*-**3ah** is a pale-red solid (529 mg, 66%).

**<sup>1</sup>H NMR (400 MHz, CDCl<sub>3</sub>)**  $\delta$  8.02-7.95 (m, 2H), 7.56-7.49 (m, 2H), 7.20-7.12 (m, 1H), 6.95 (d,  $J$  = 7.5 Hz, 1H), 6.86 (d,  $J$  = 8.0 Hz, 1H), 6.81-6.73 (m, 1H), 5.22 (dd,  $J$  = 2.3, 1.6 Hz, 1H), 5.10 (dd,  $J$  = 9.0, 6.4 Hz, 1H), 4.8 (t,  $J$  = 9.2 Hz, 1H).

**<sup>13</sup>C NMR (100 MHz, CDCl<sub>3</sub>)**  $\delta$  195.1, 160.1, 140.3, 134.4, 130.4, 129.5, 129.3, 125.0, 124.6, 120.5, 110.3, 72.4, 49.5.

**HRMS** (ESI,  $m/z$ ) calcd. for C<sub>15</sub>H<sub>12</sub>ClO<sub>2</sub> [M+H]<sup>+</sup> 259.0520, found: 259.0519.

## 9. NMR Spectra of Racemic Standards

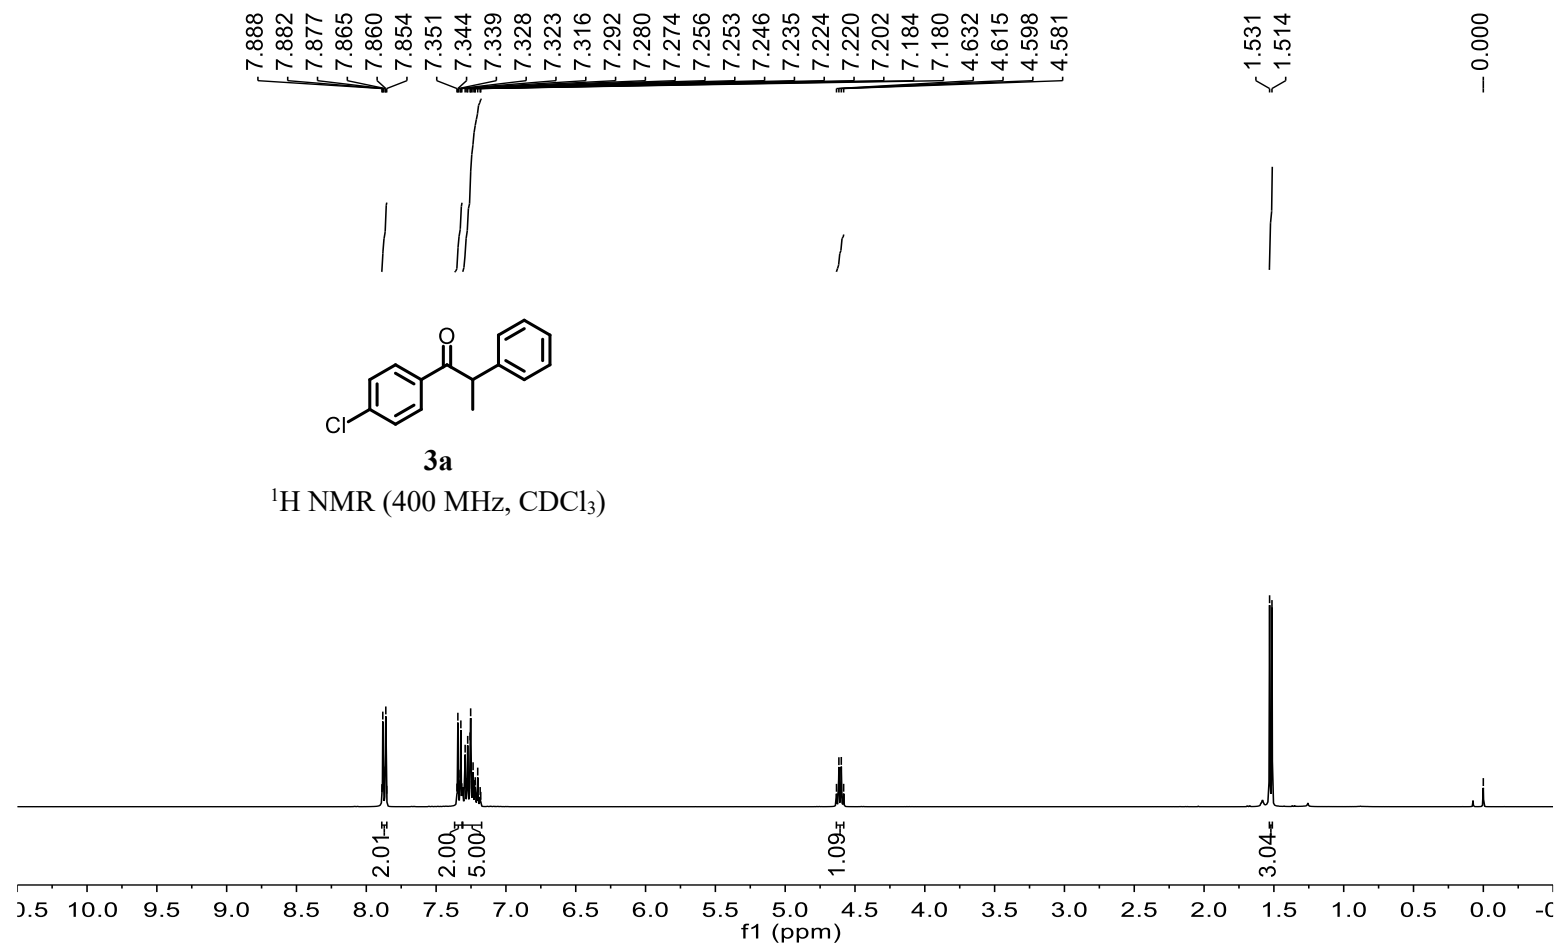

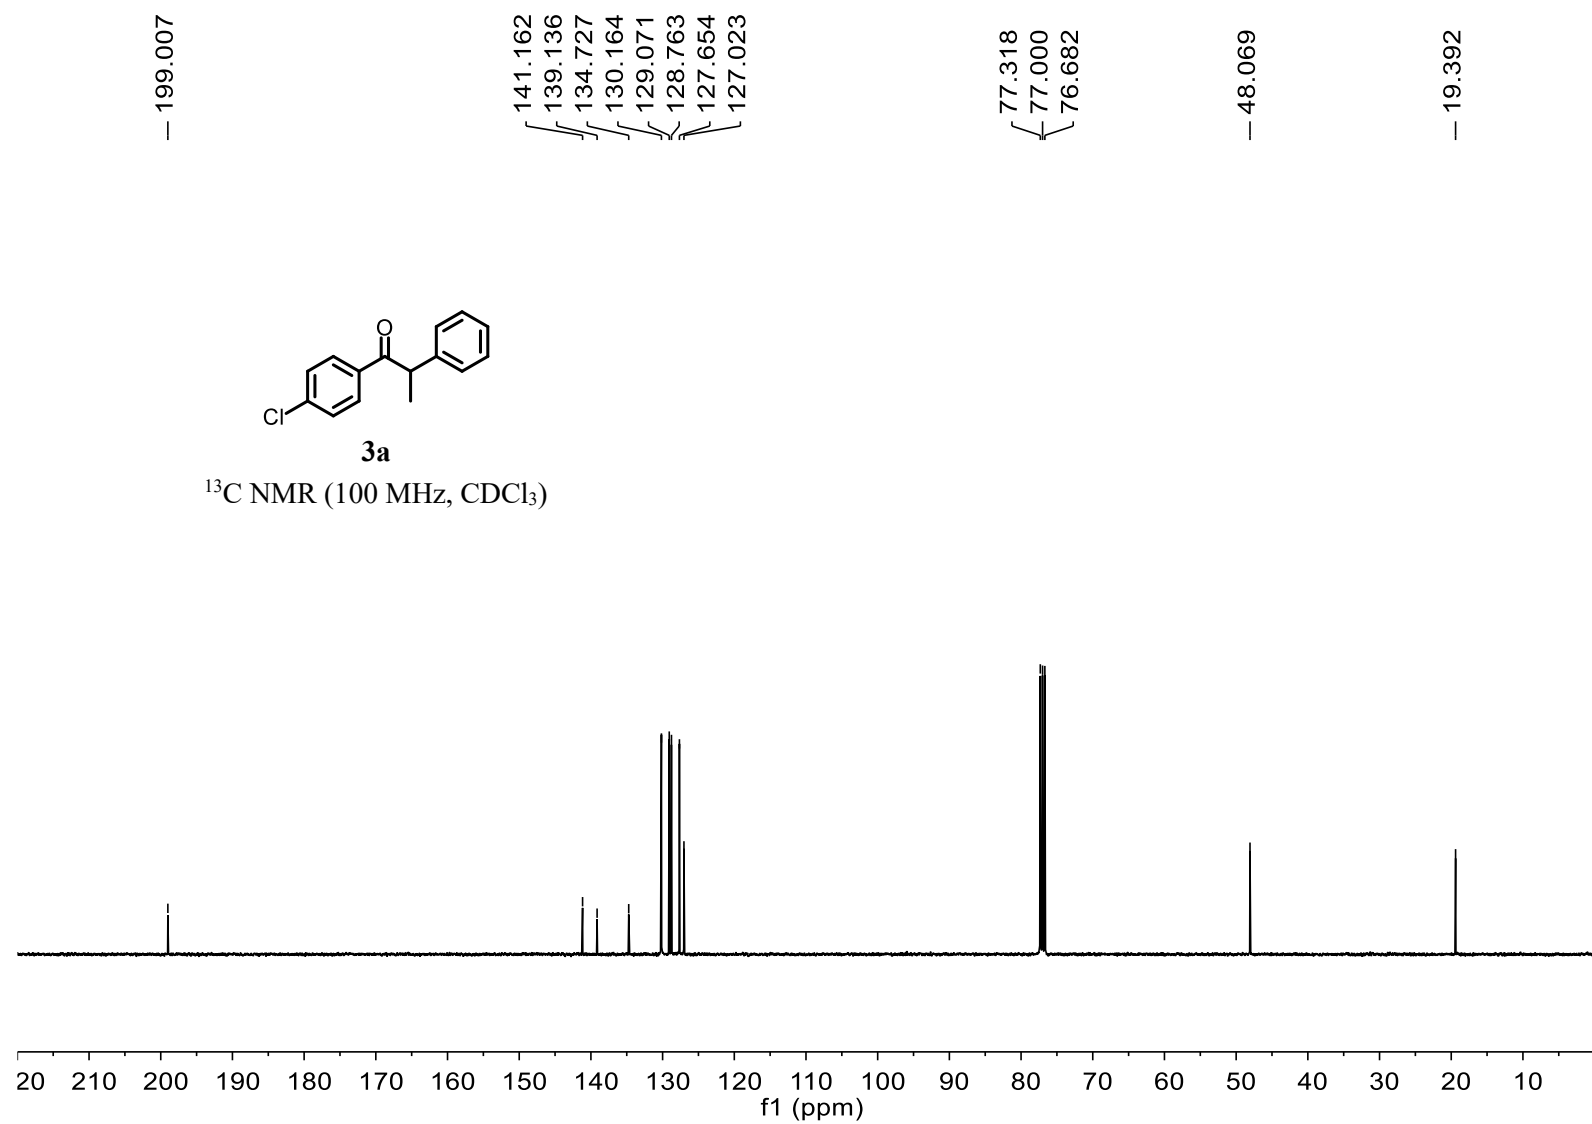

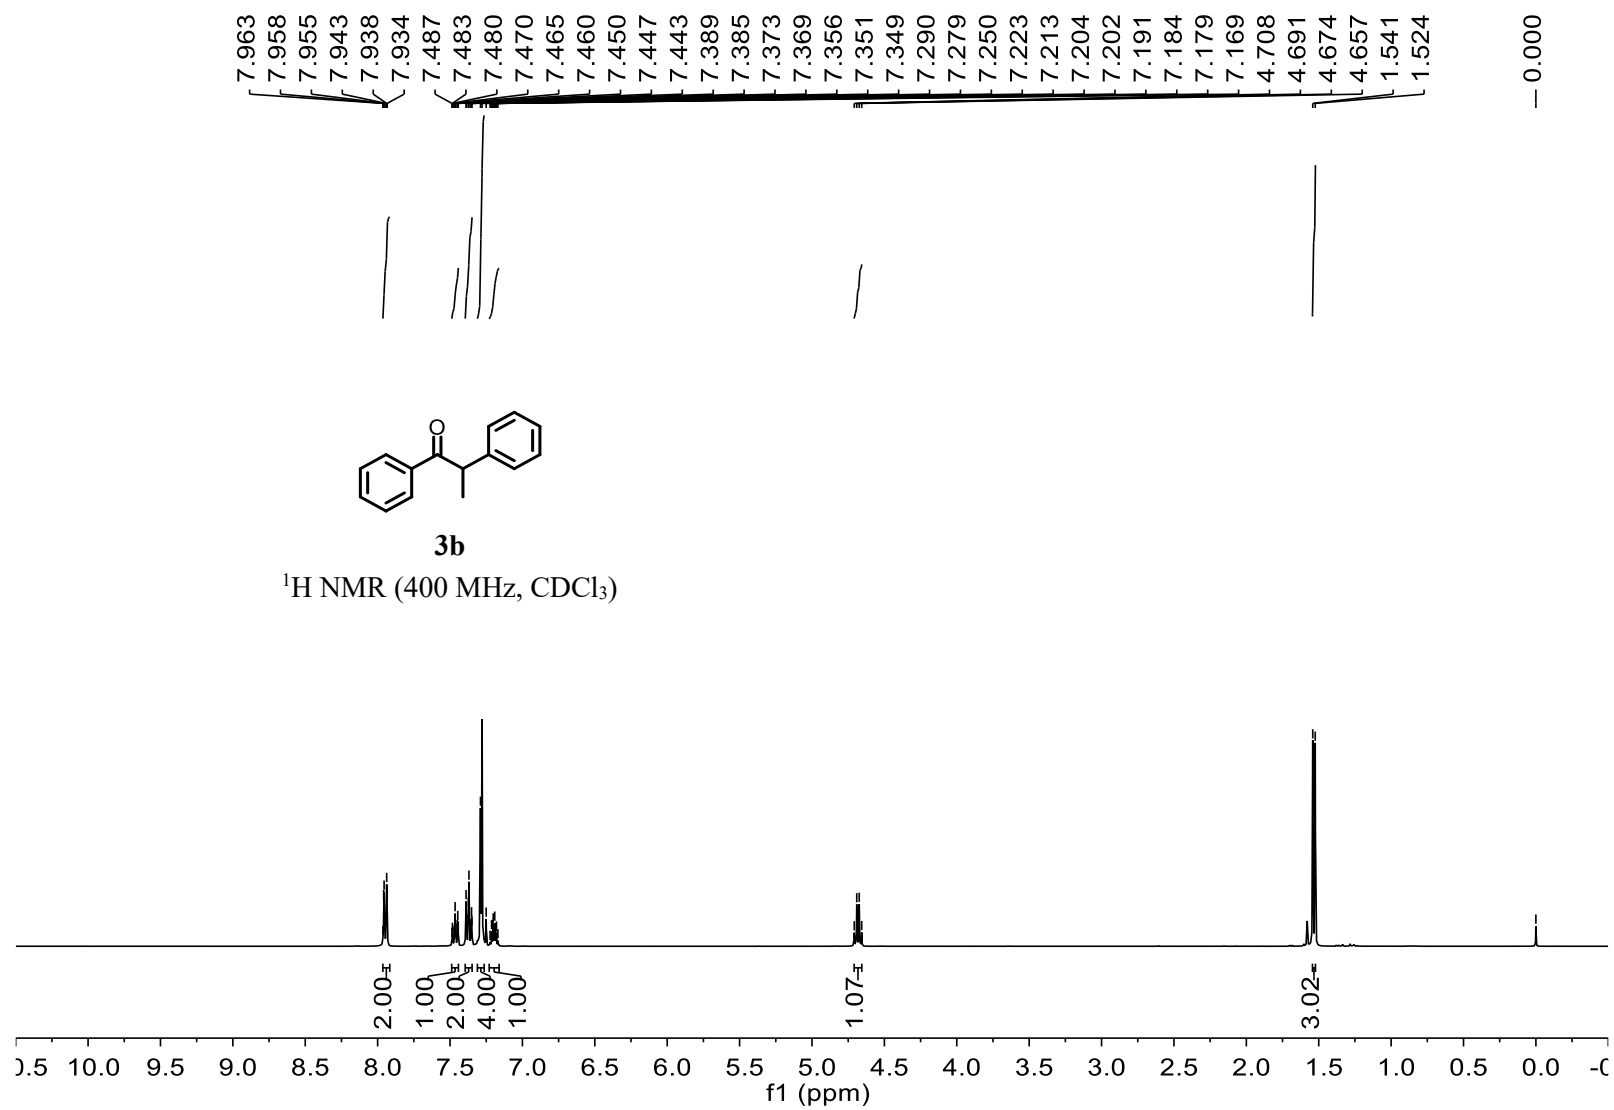

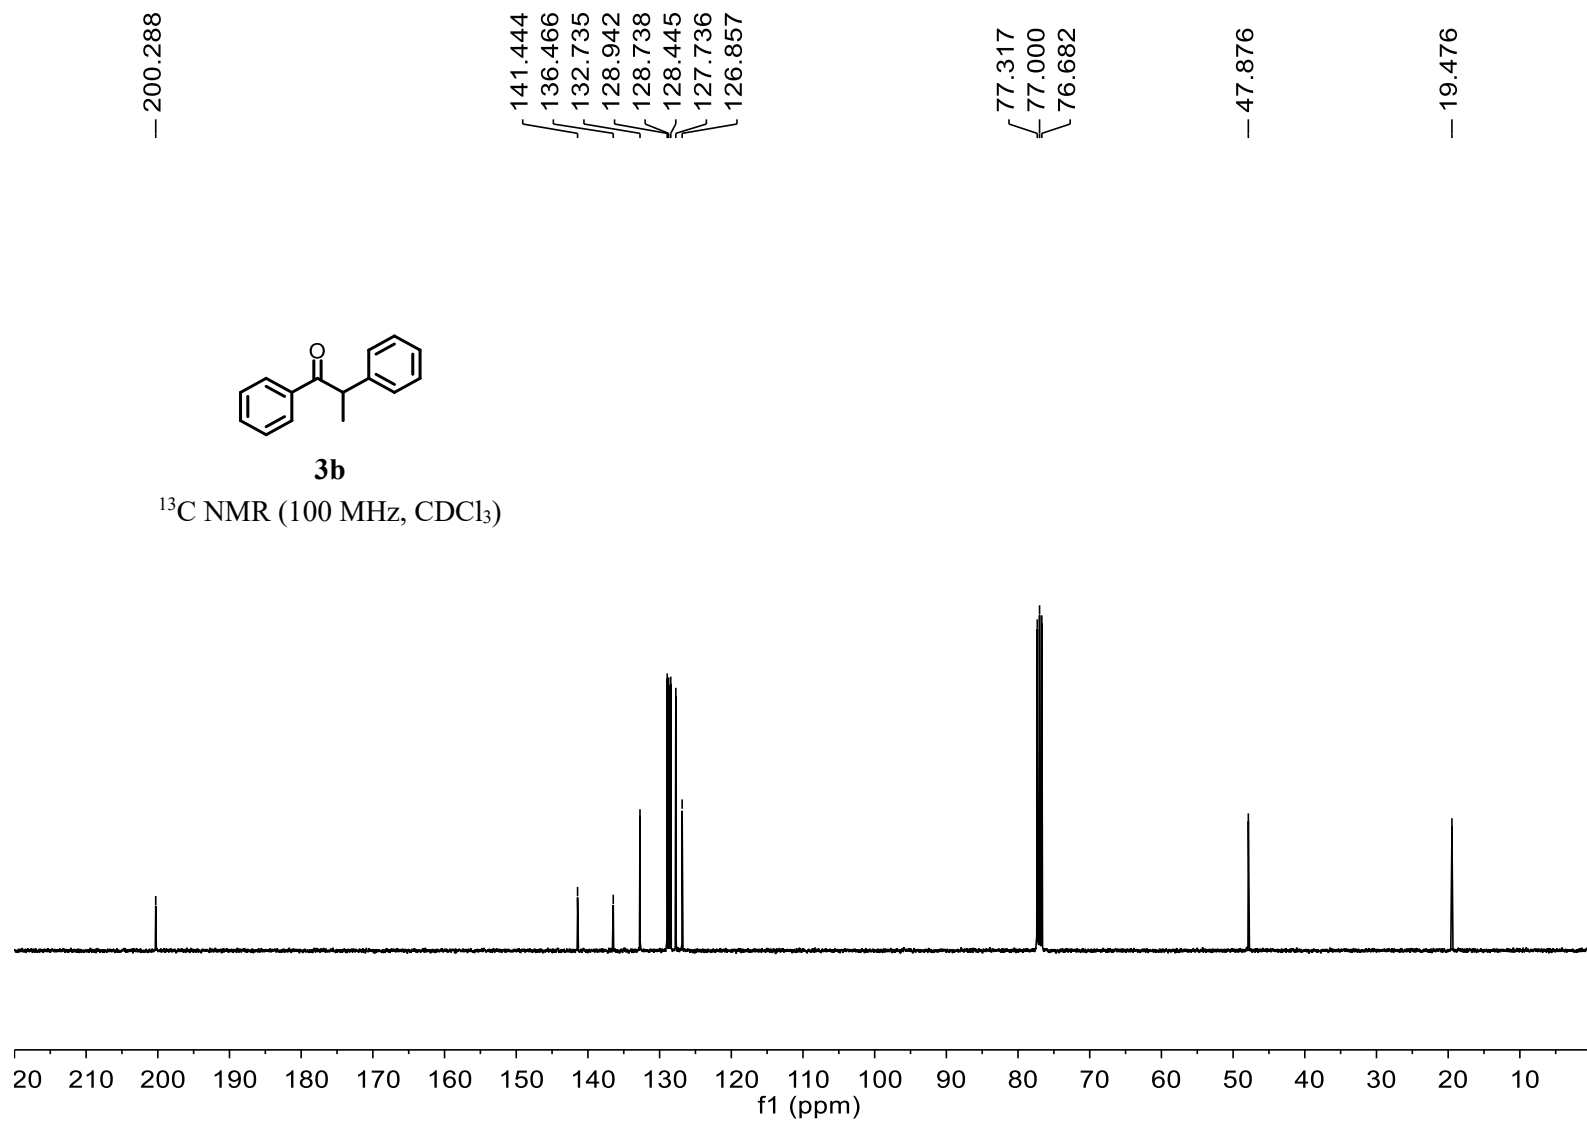

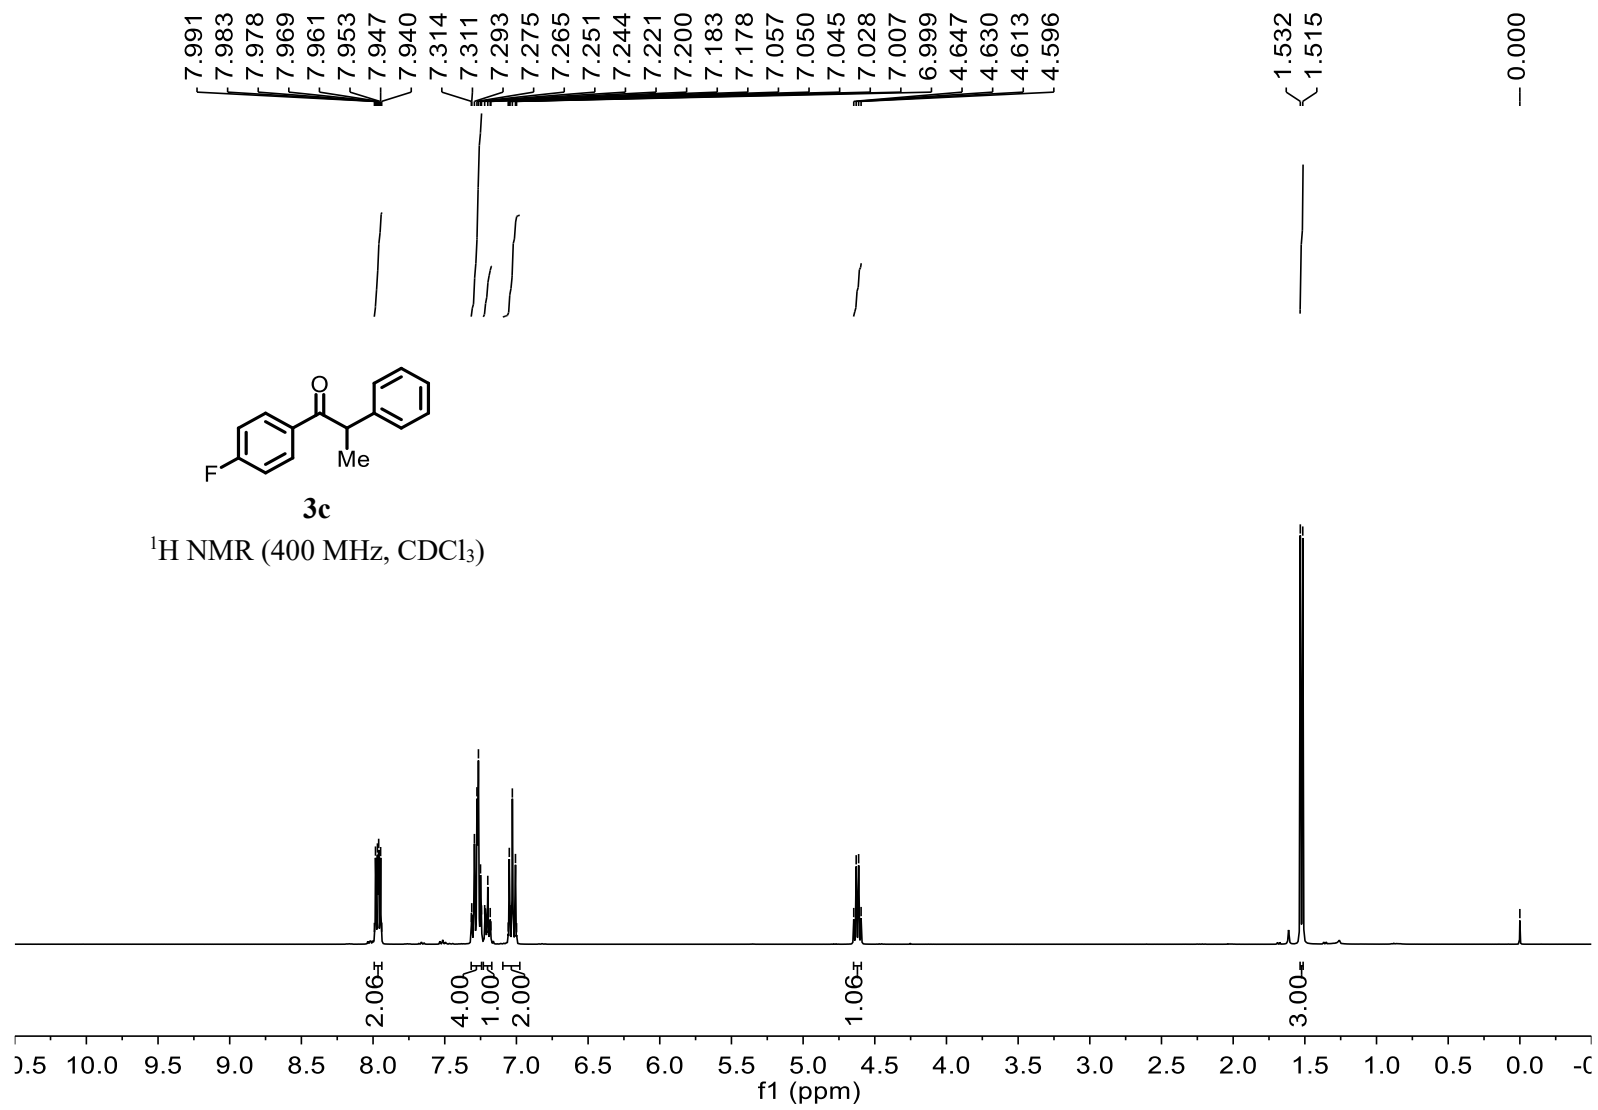



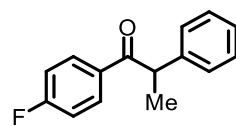

**3c**

$^{13}\text{C}$  NMR (100 MHz,  $\text{CDCl}_3$ )

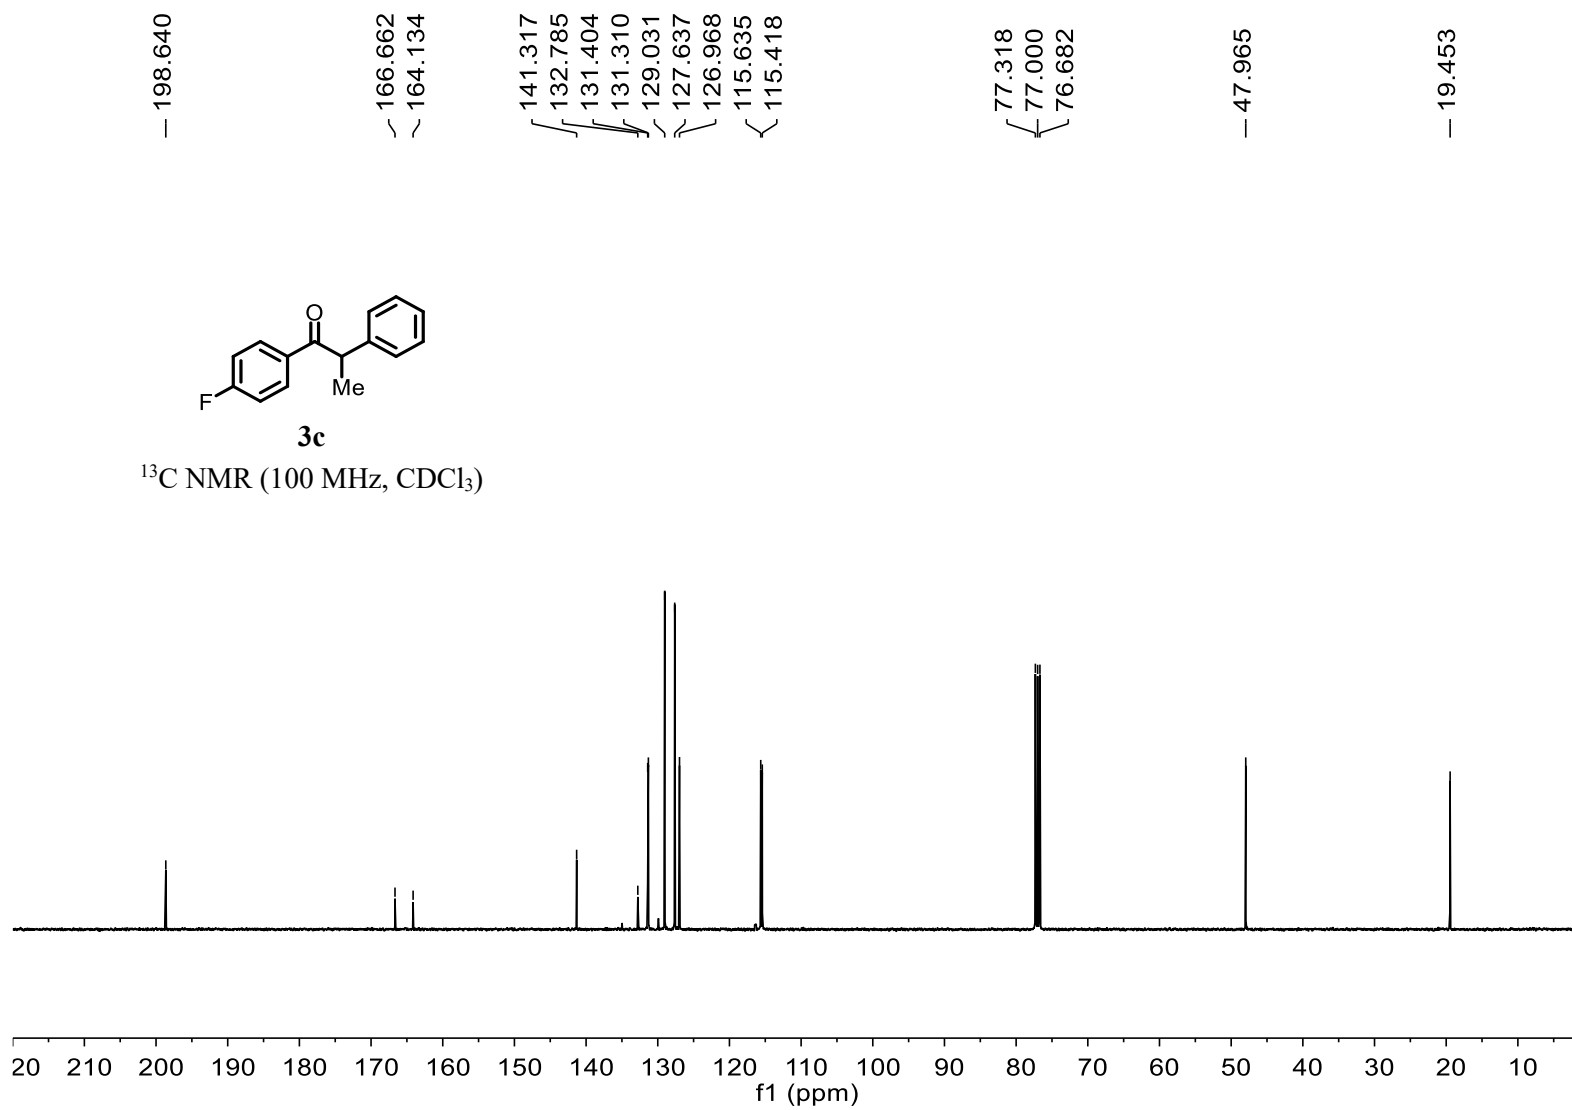

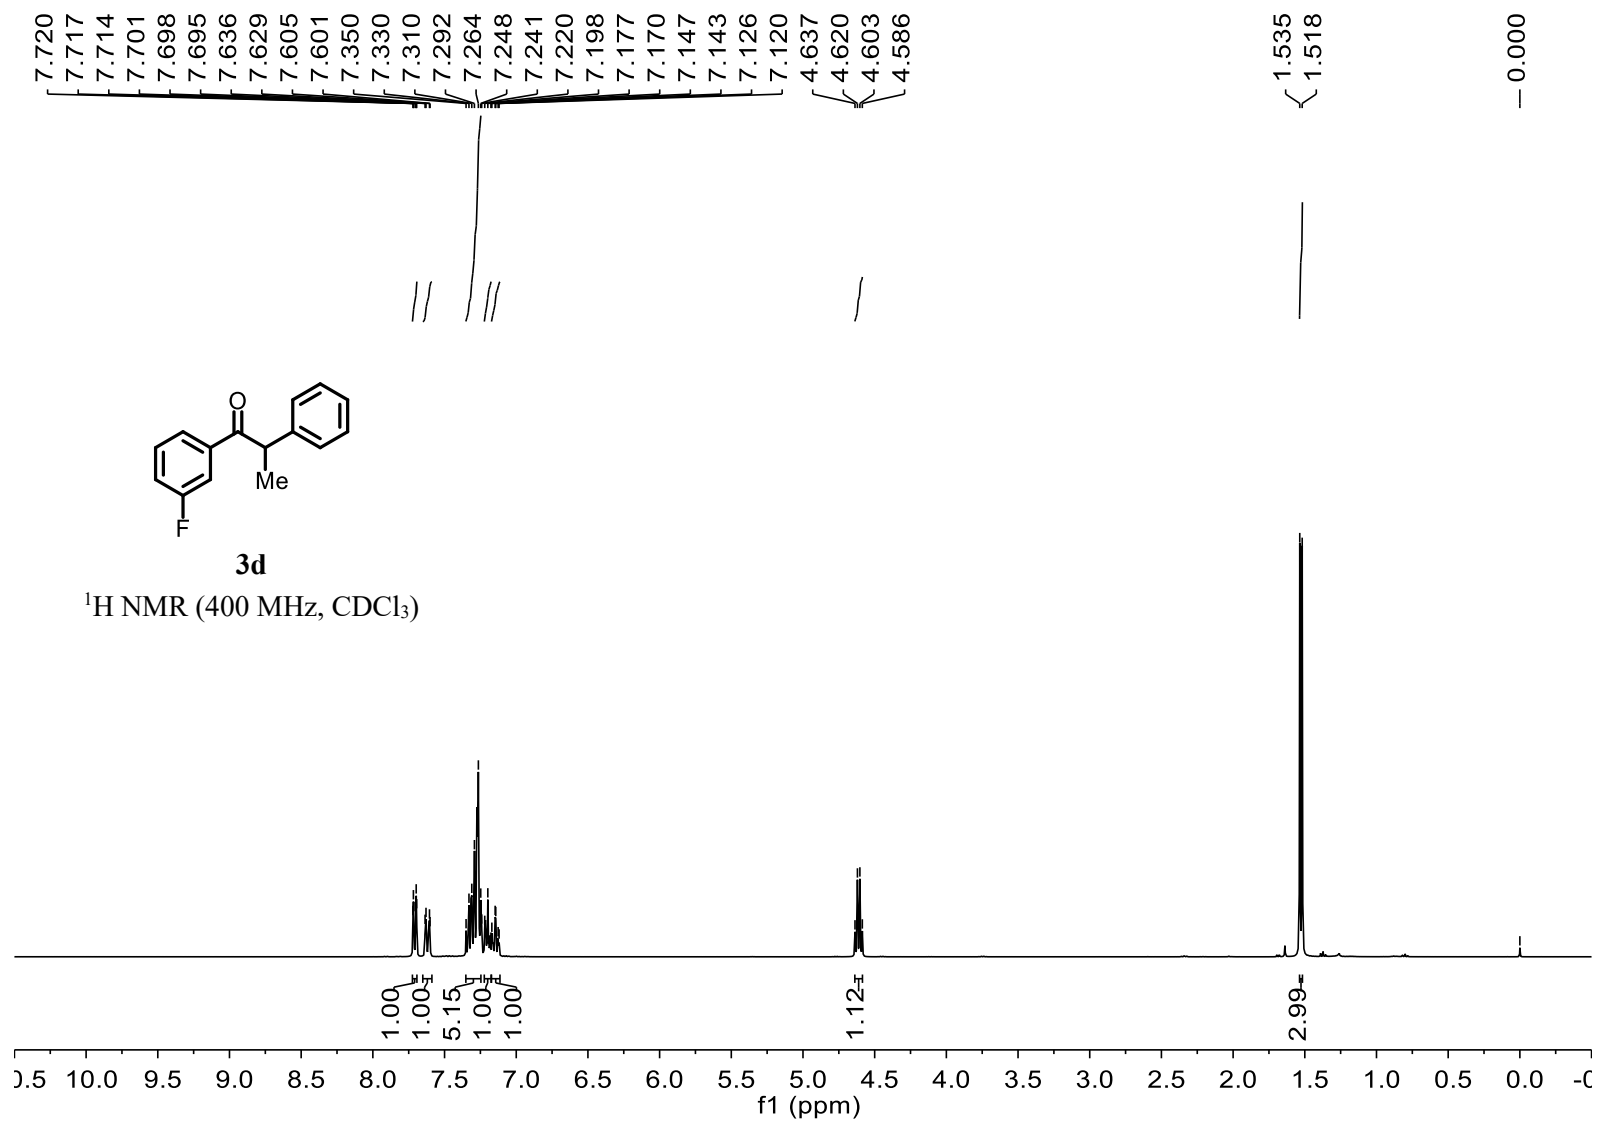

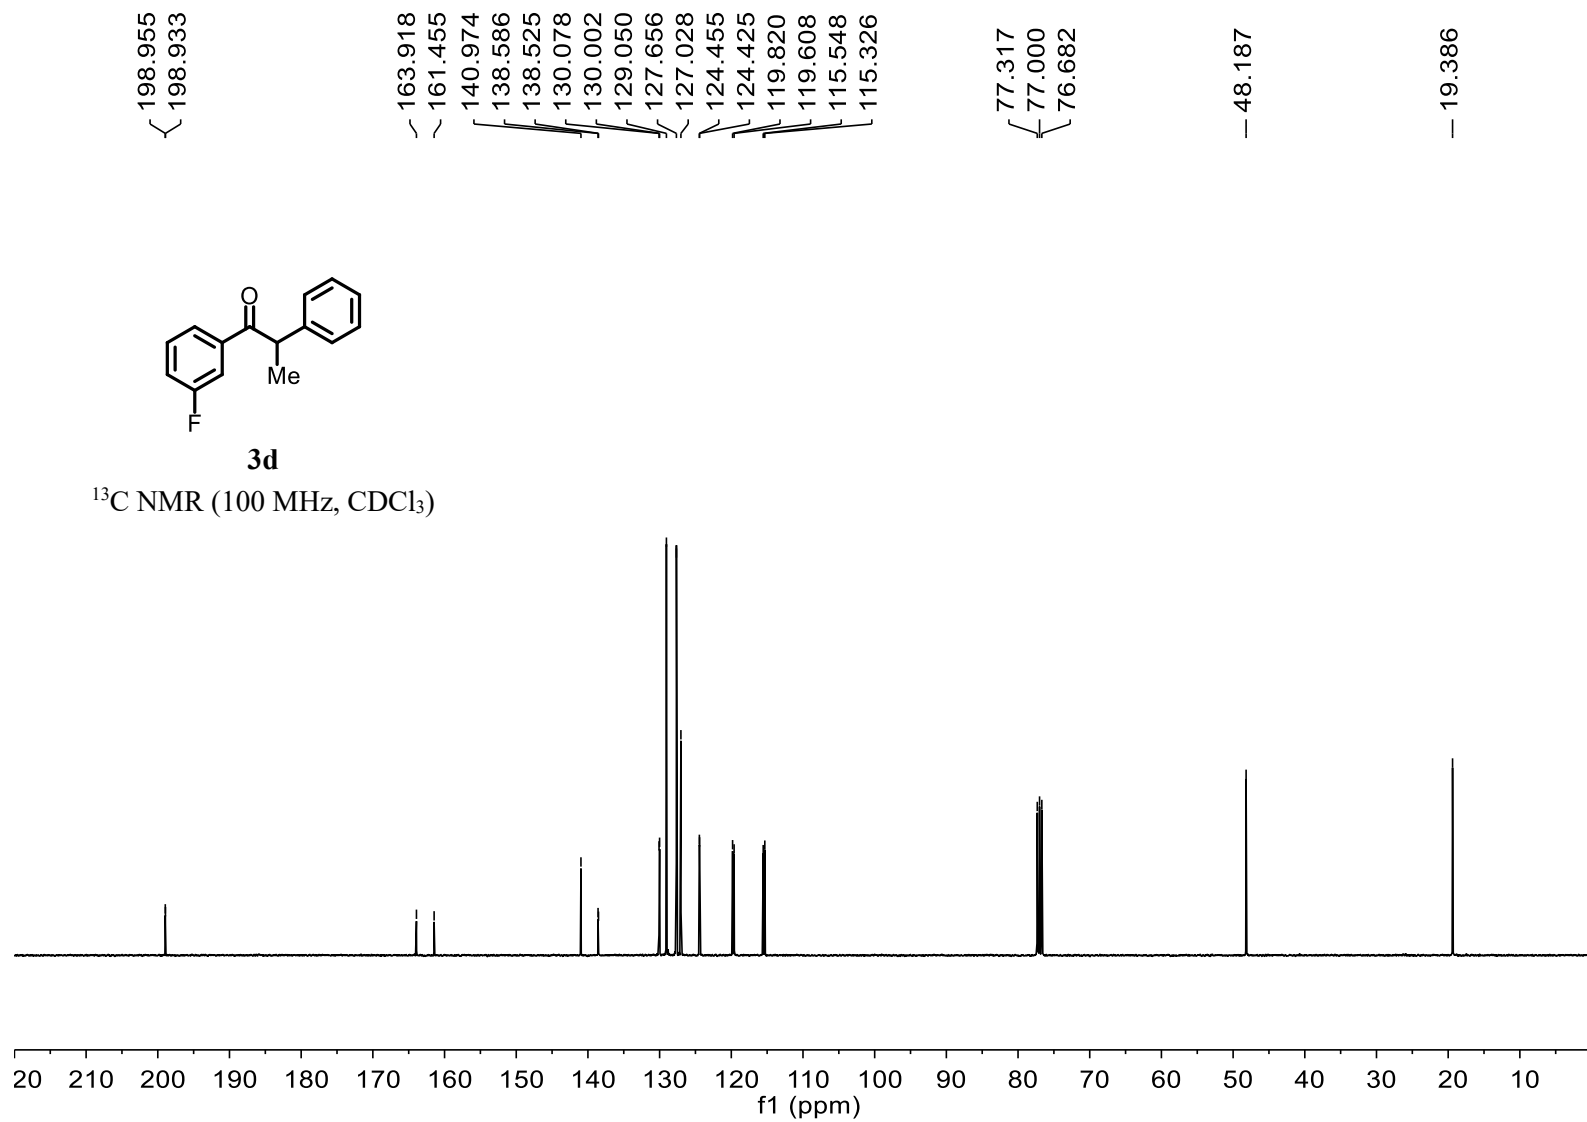

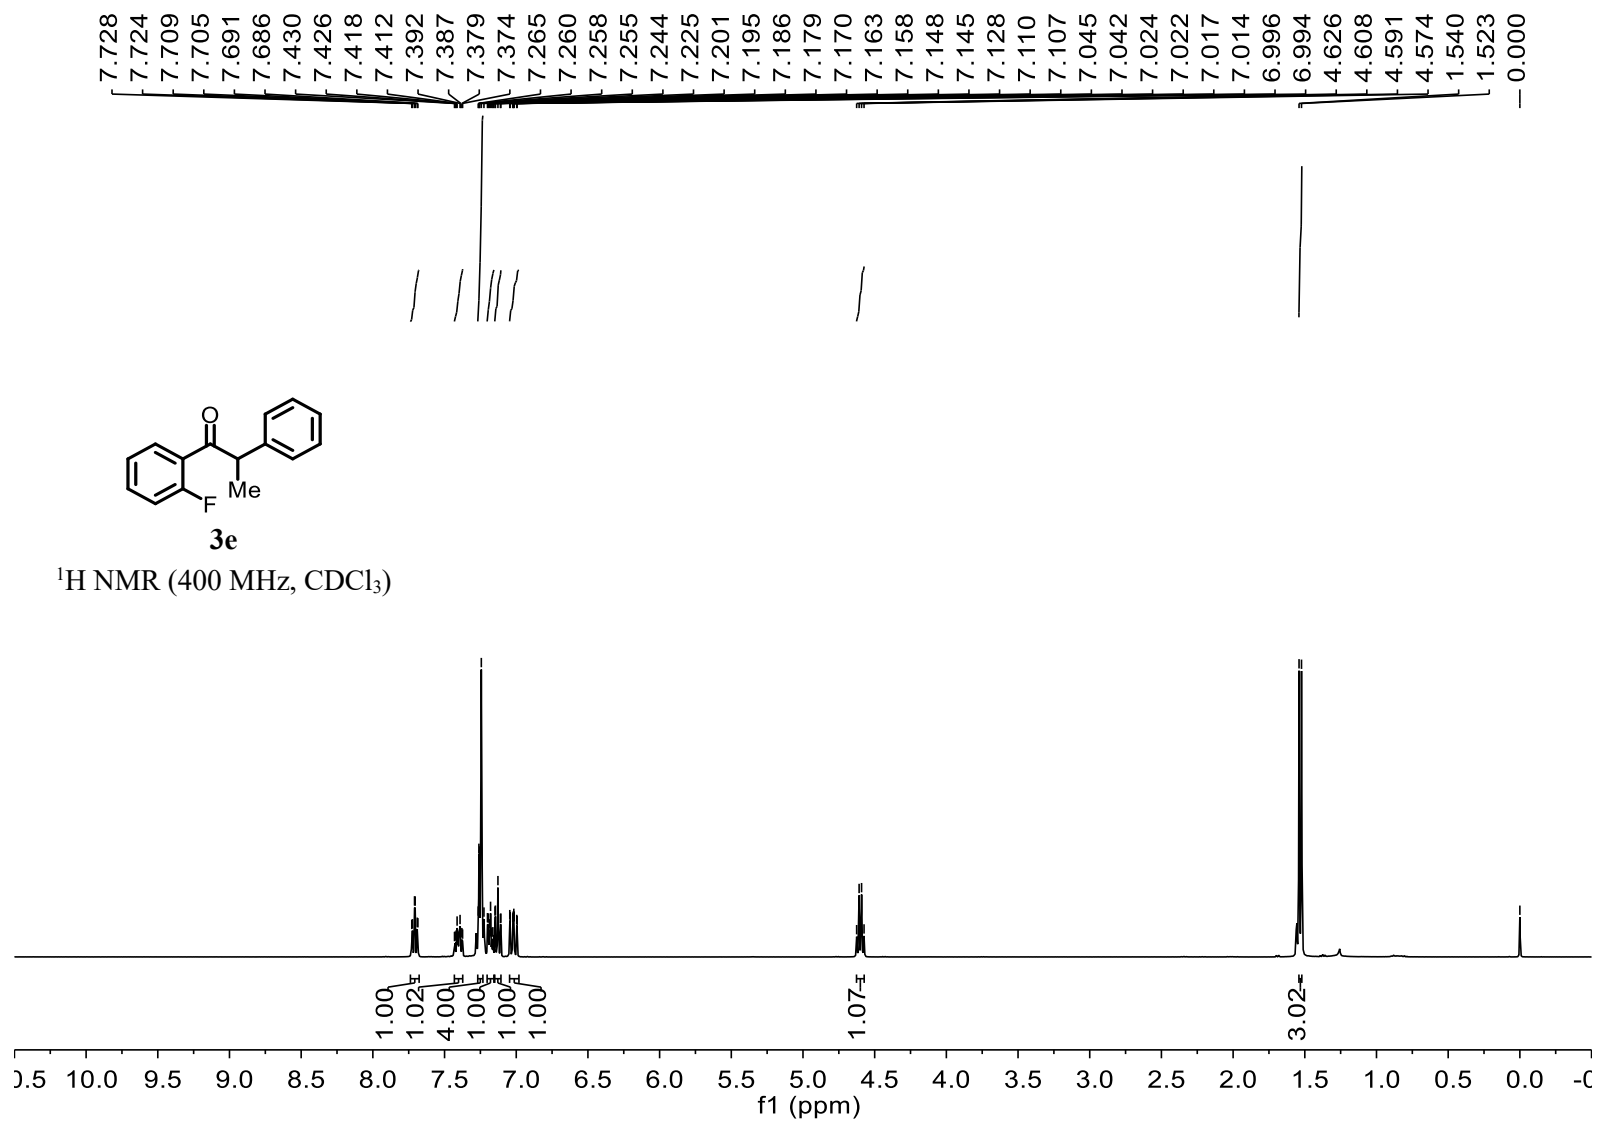

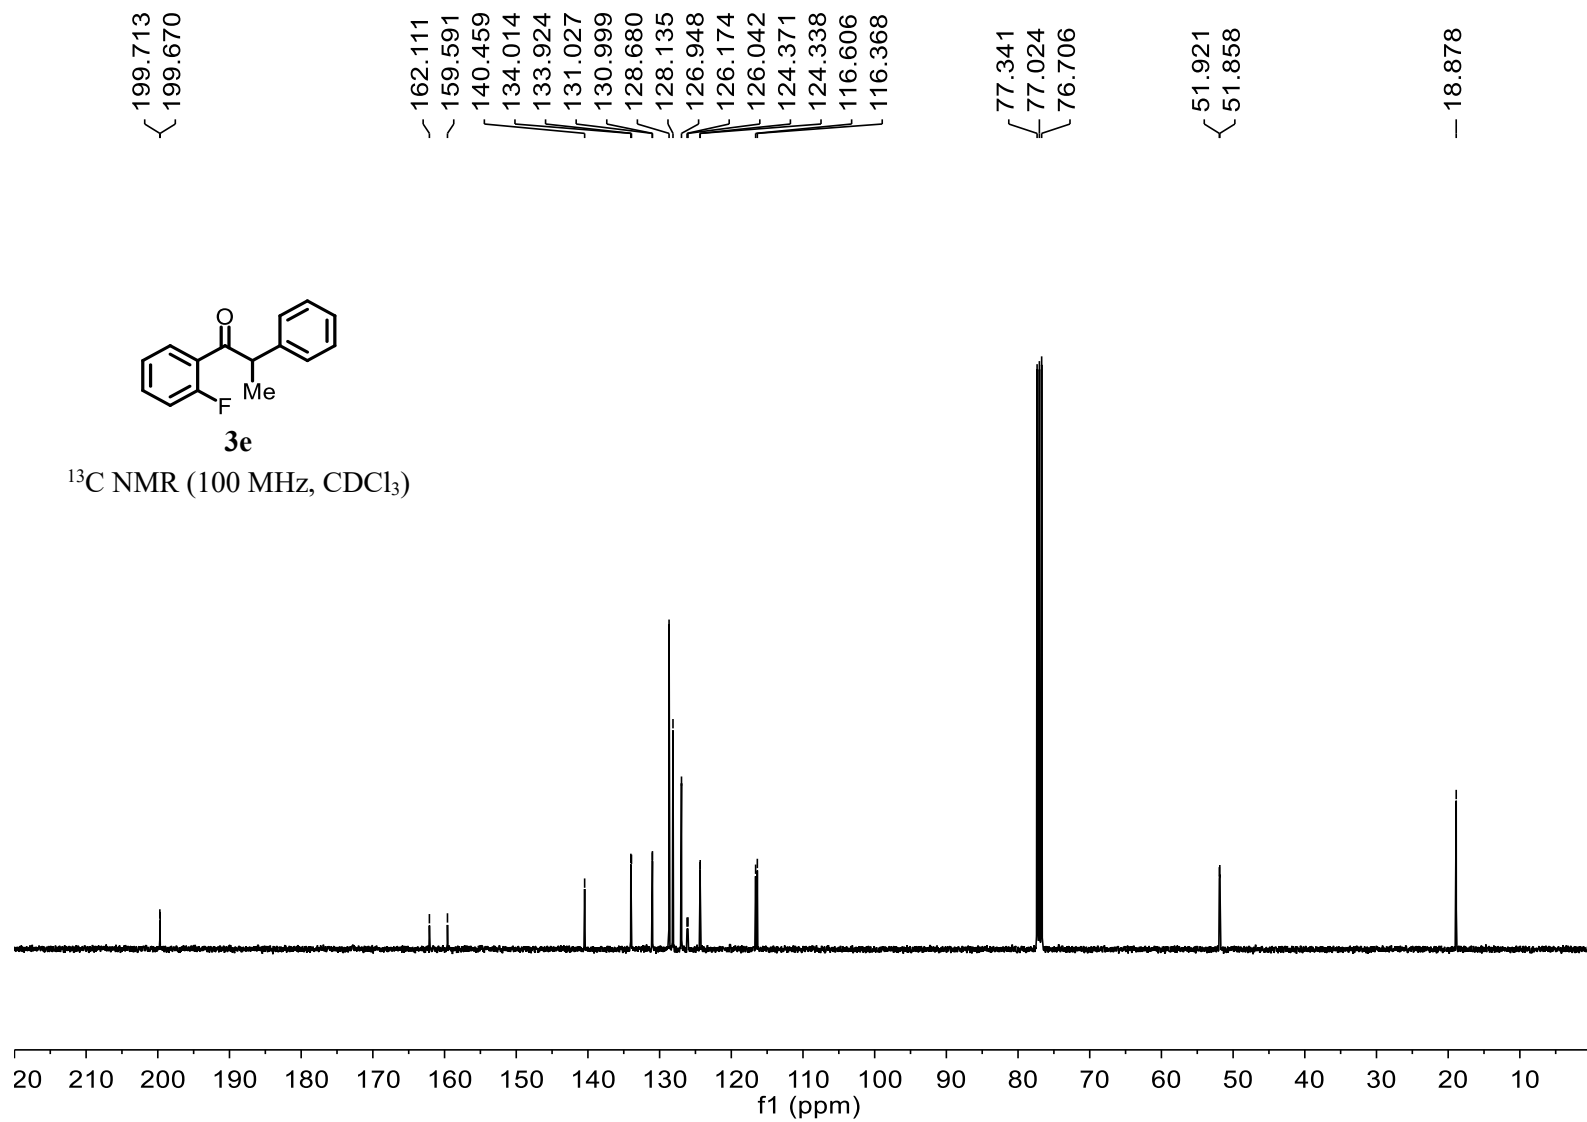

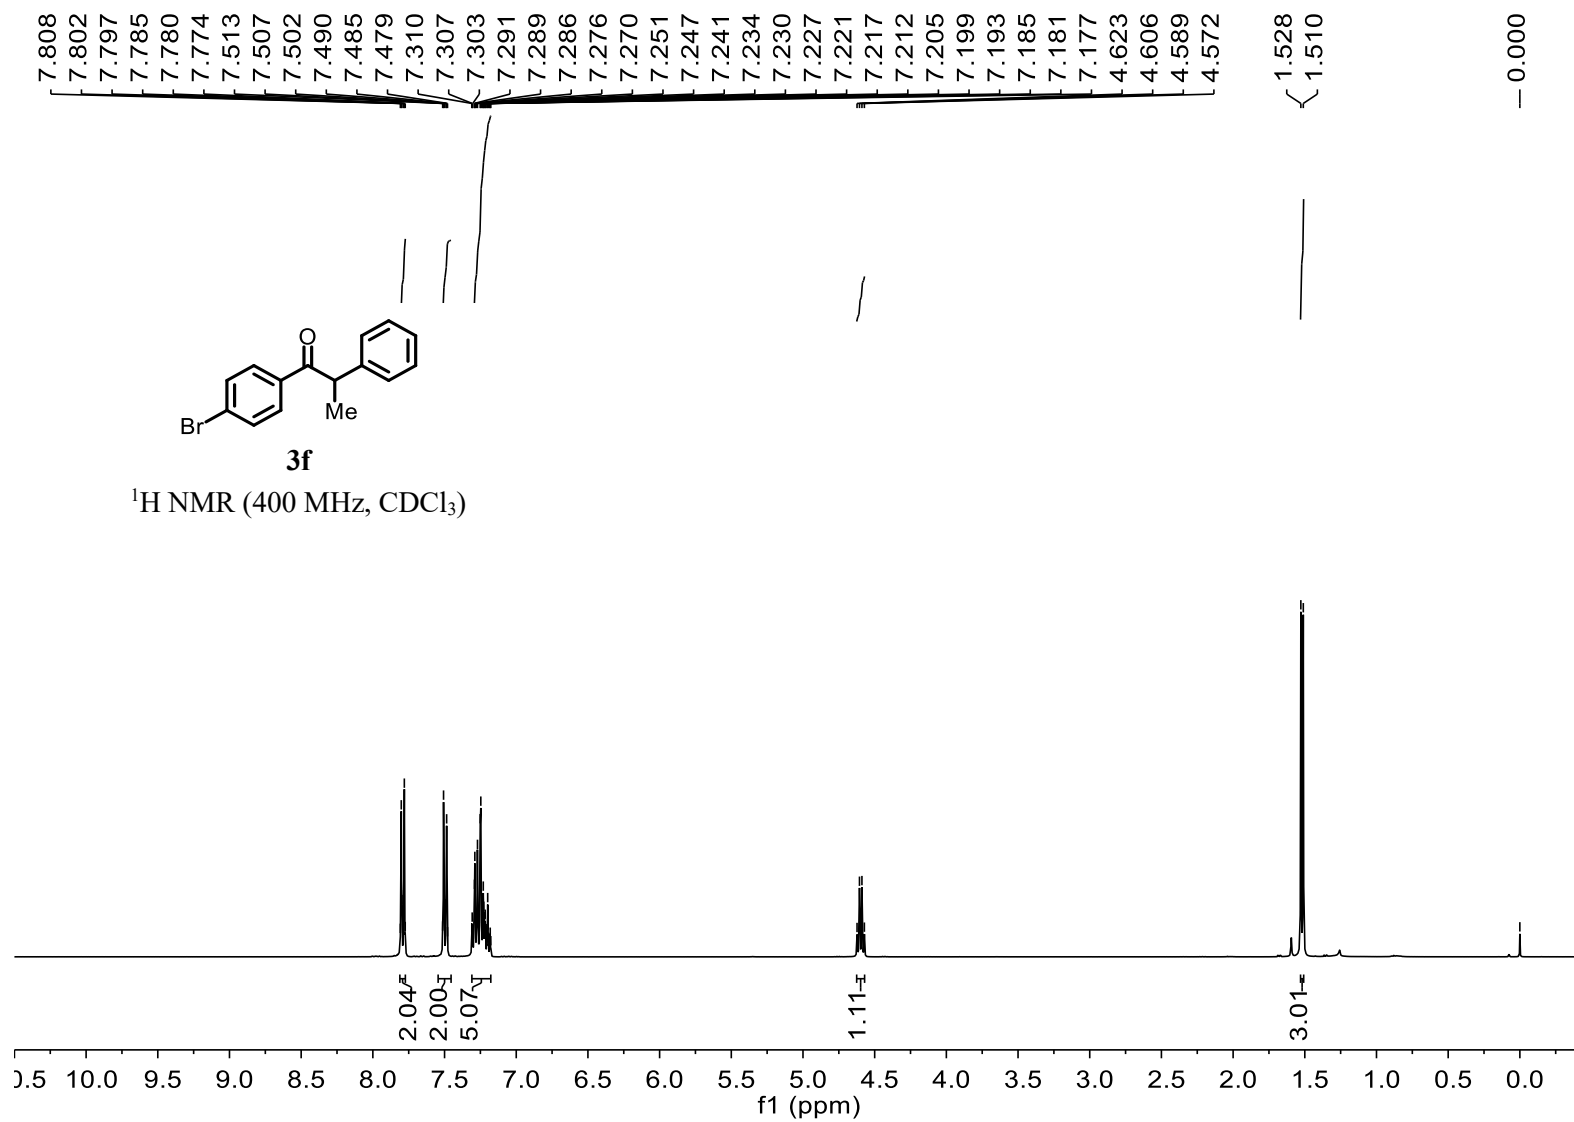

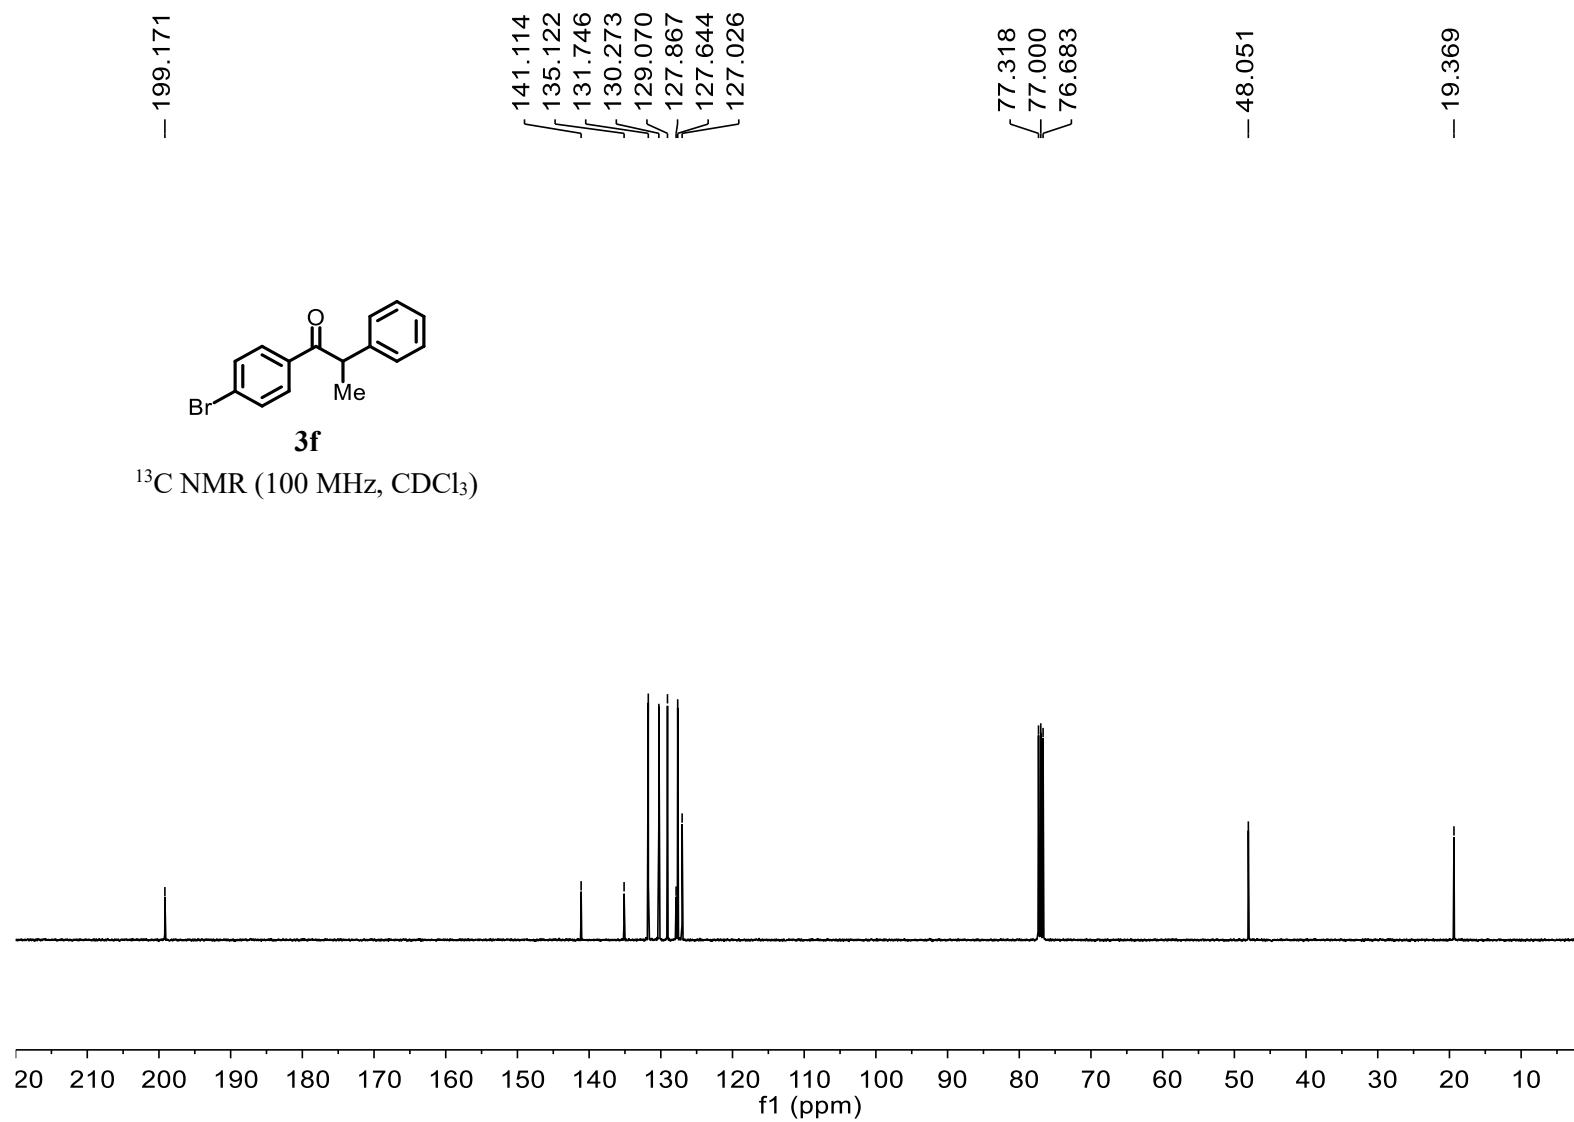

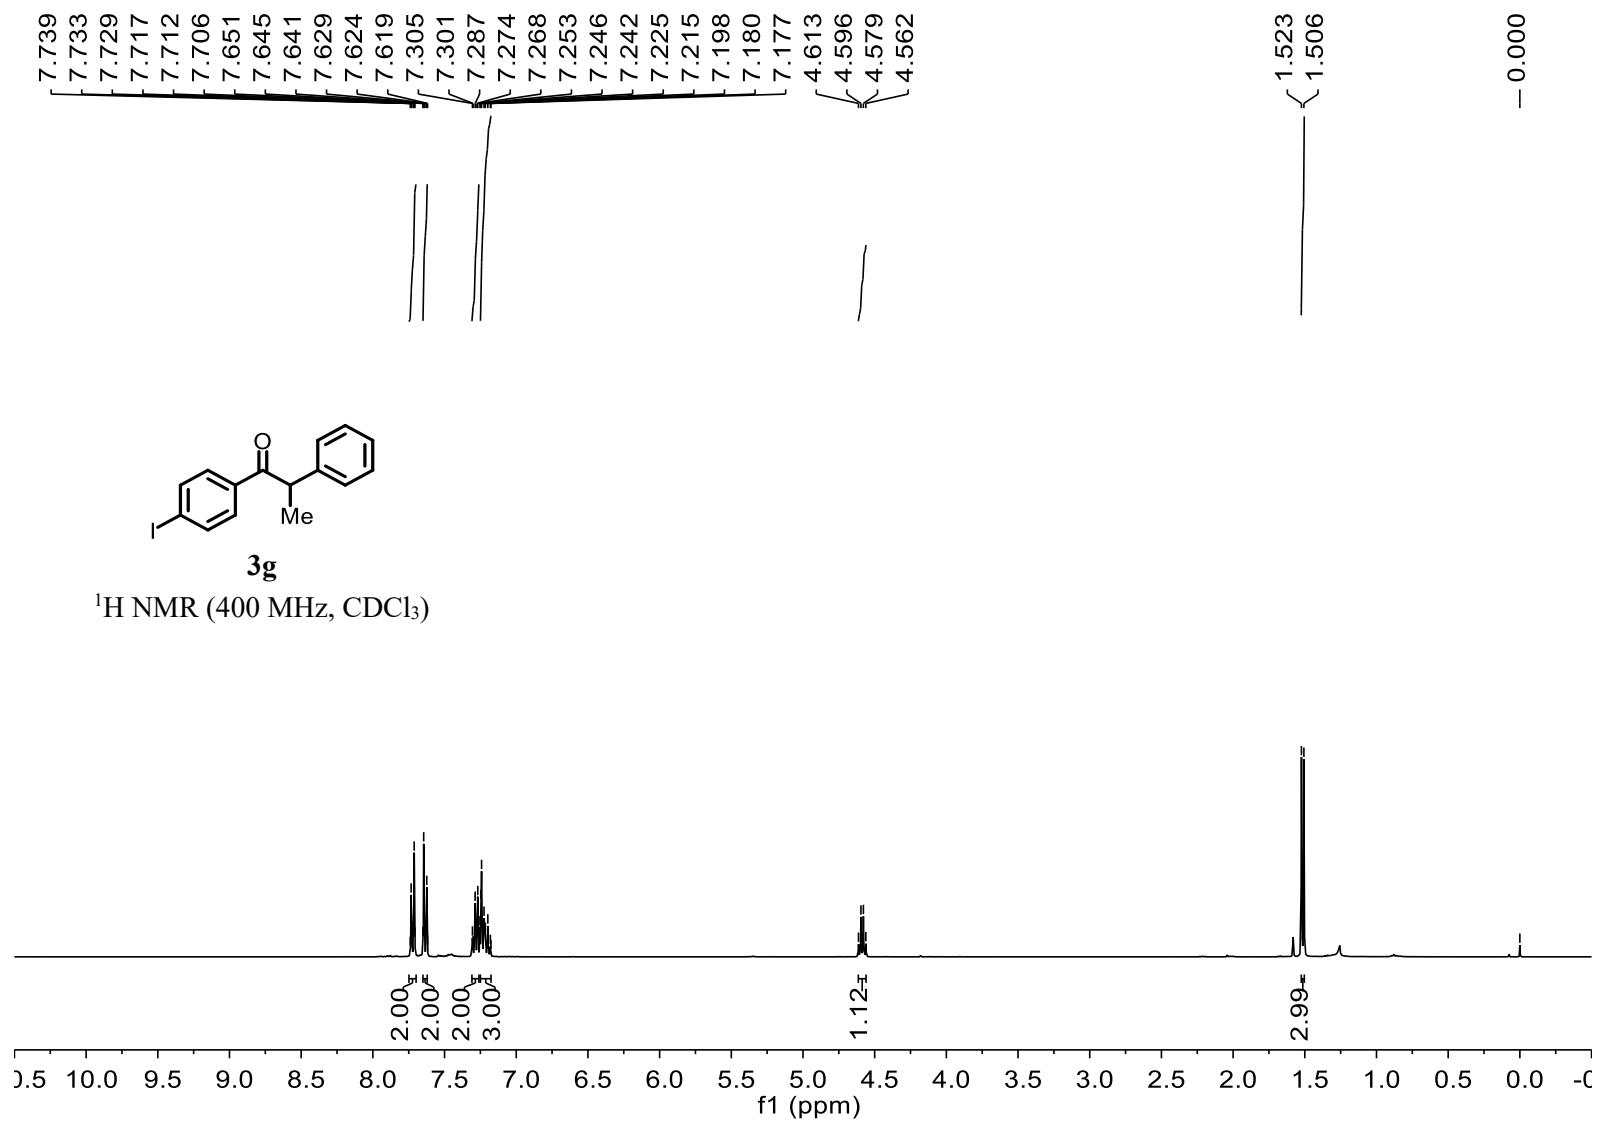



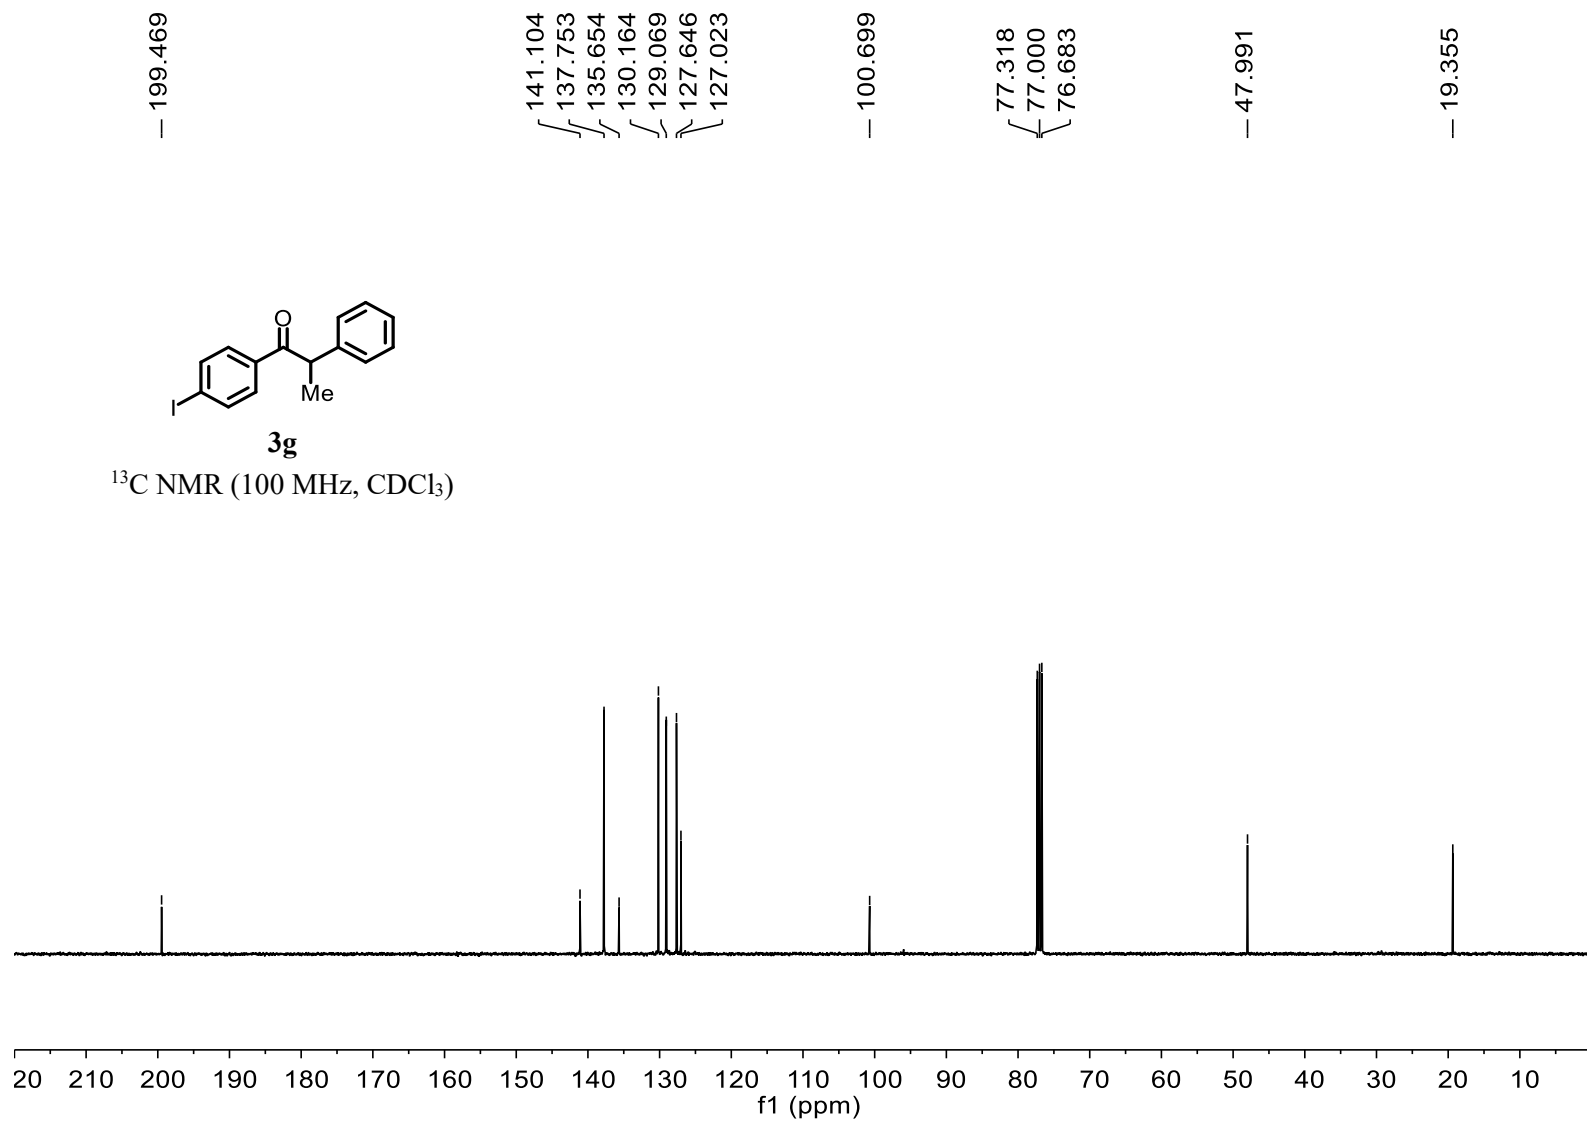

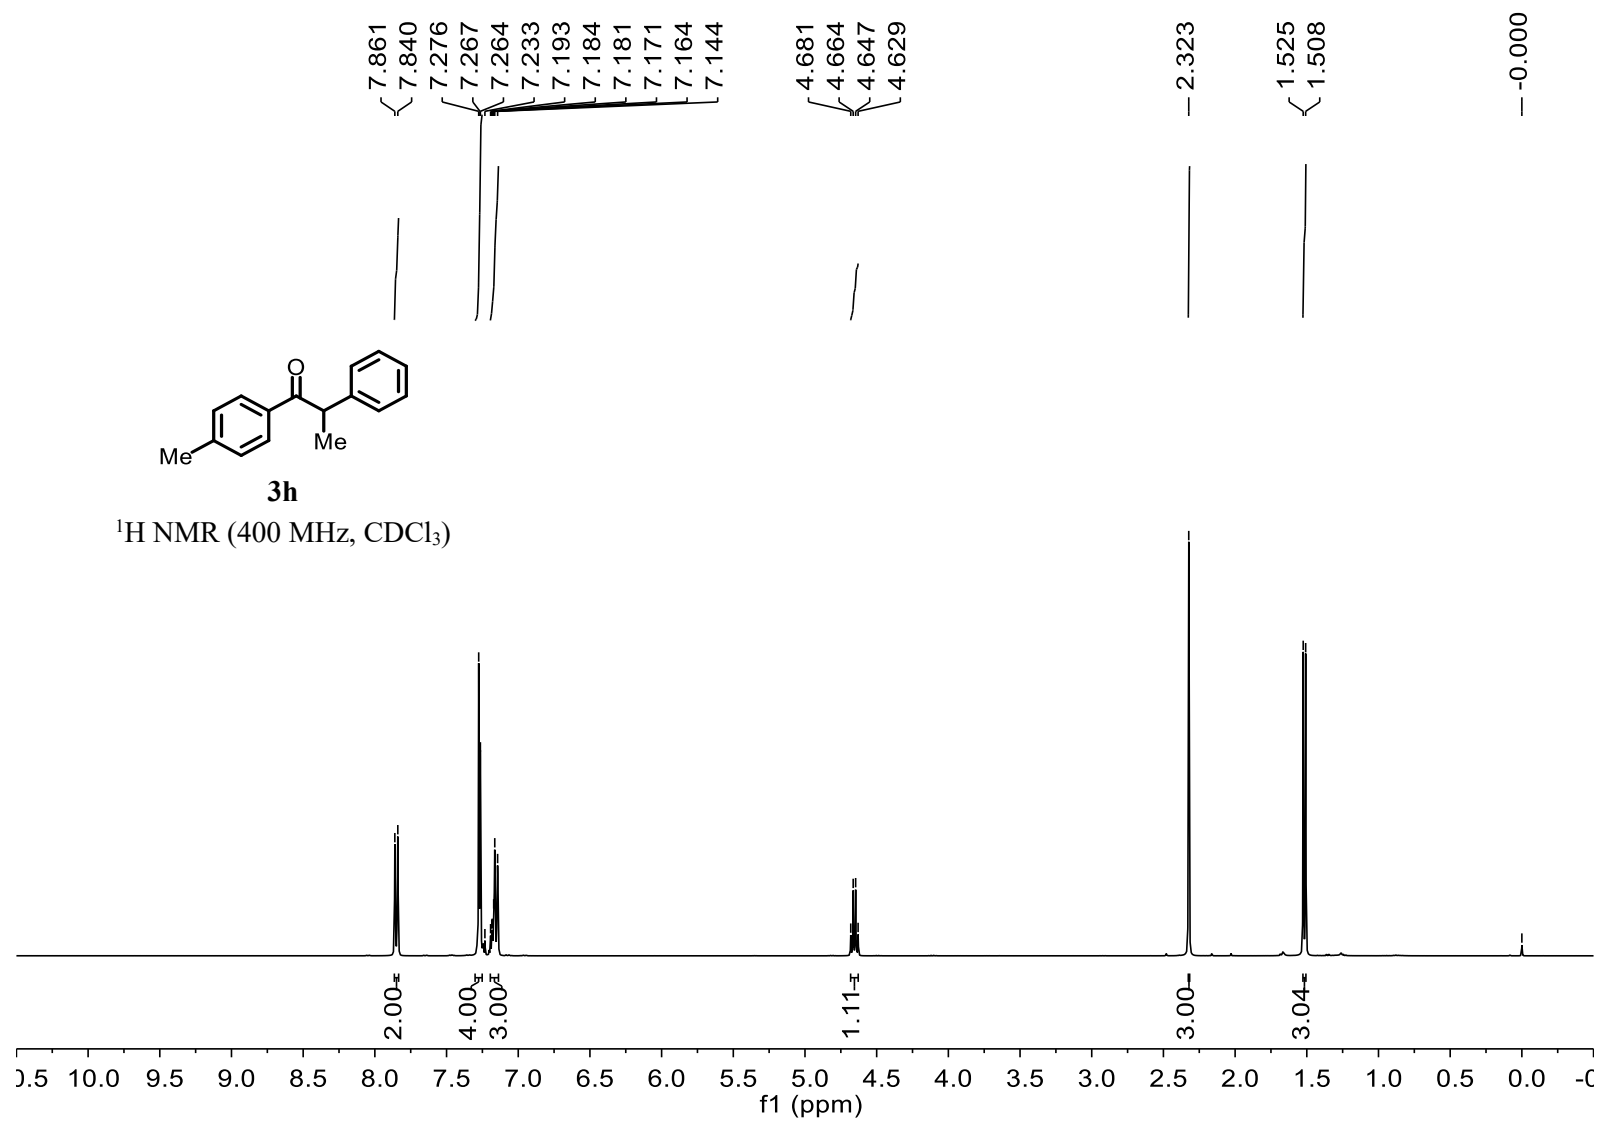

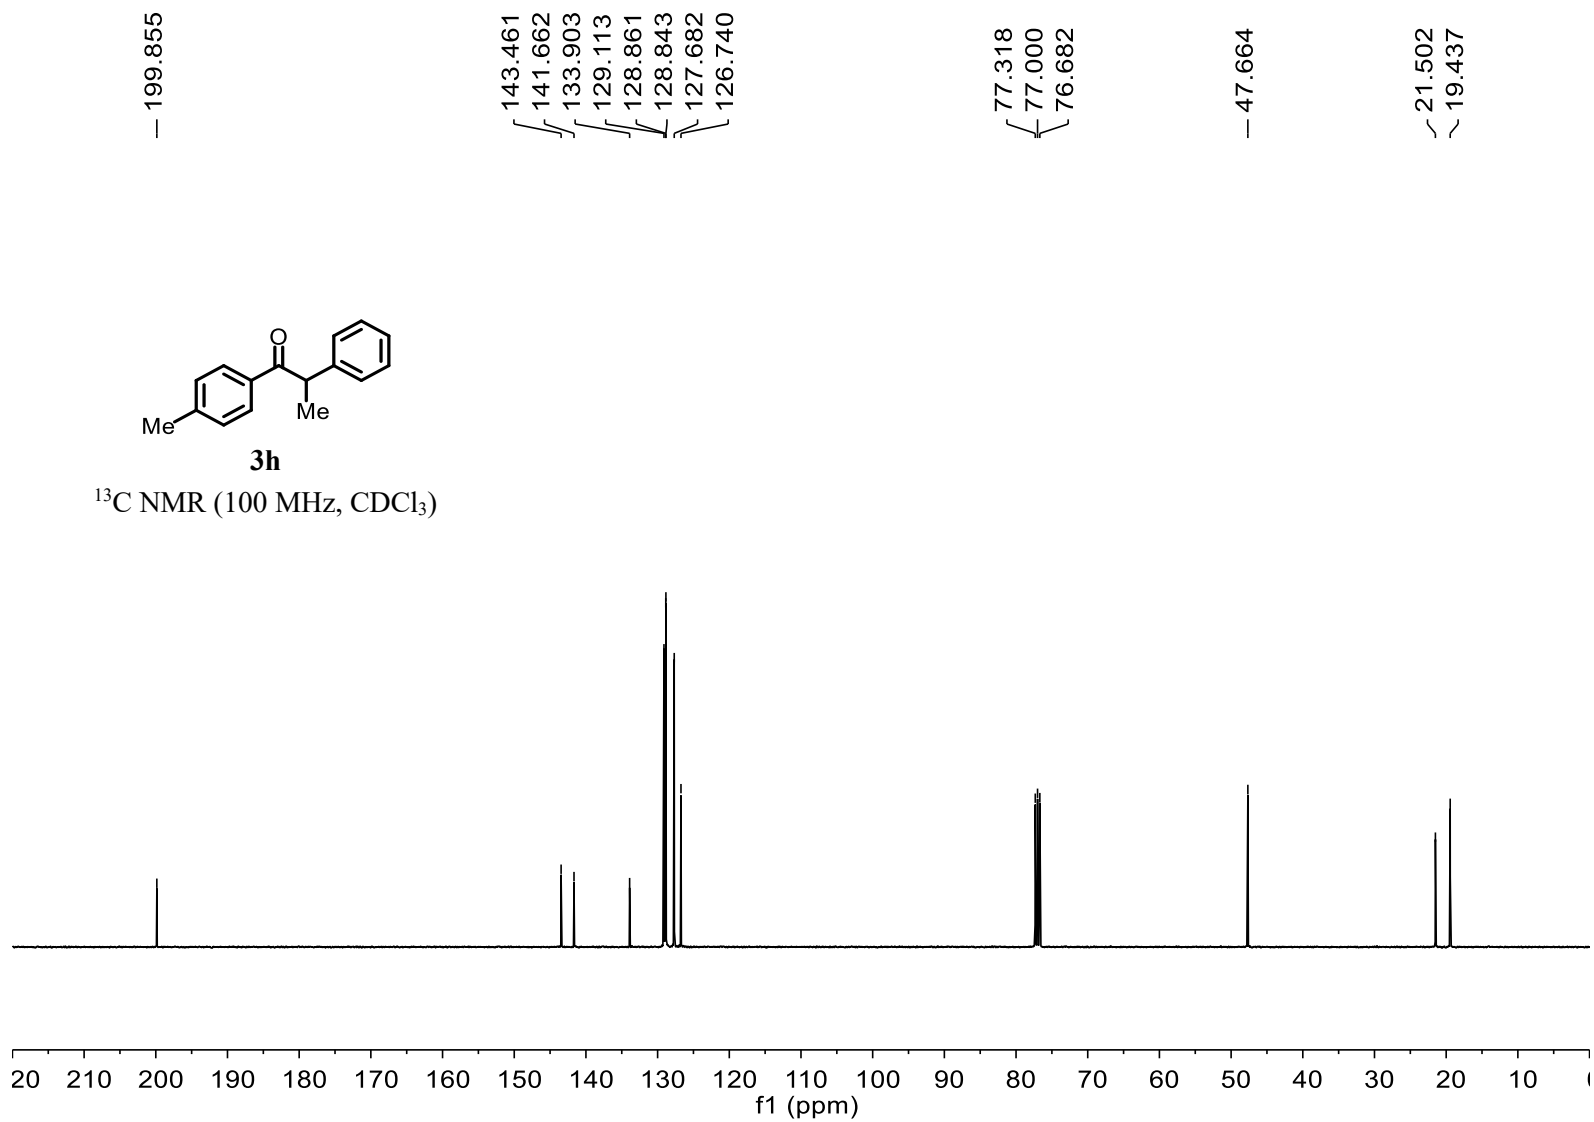

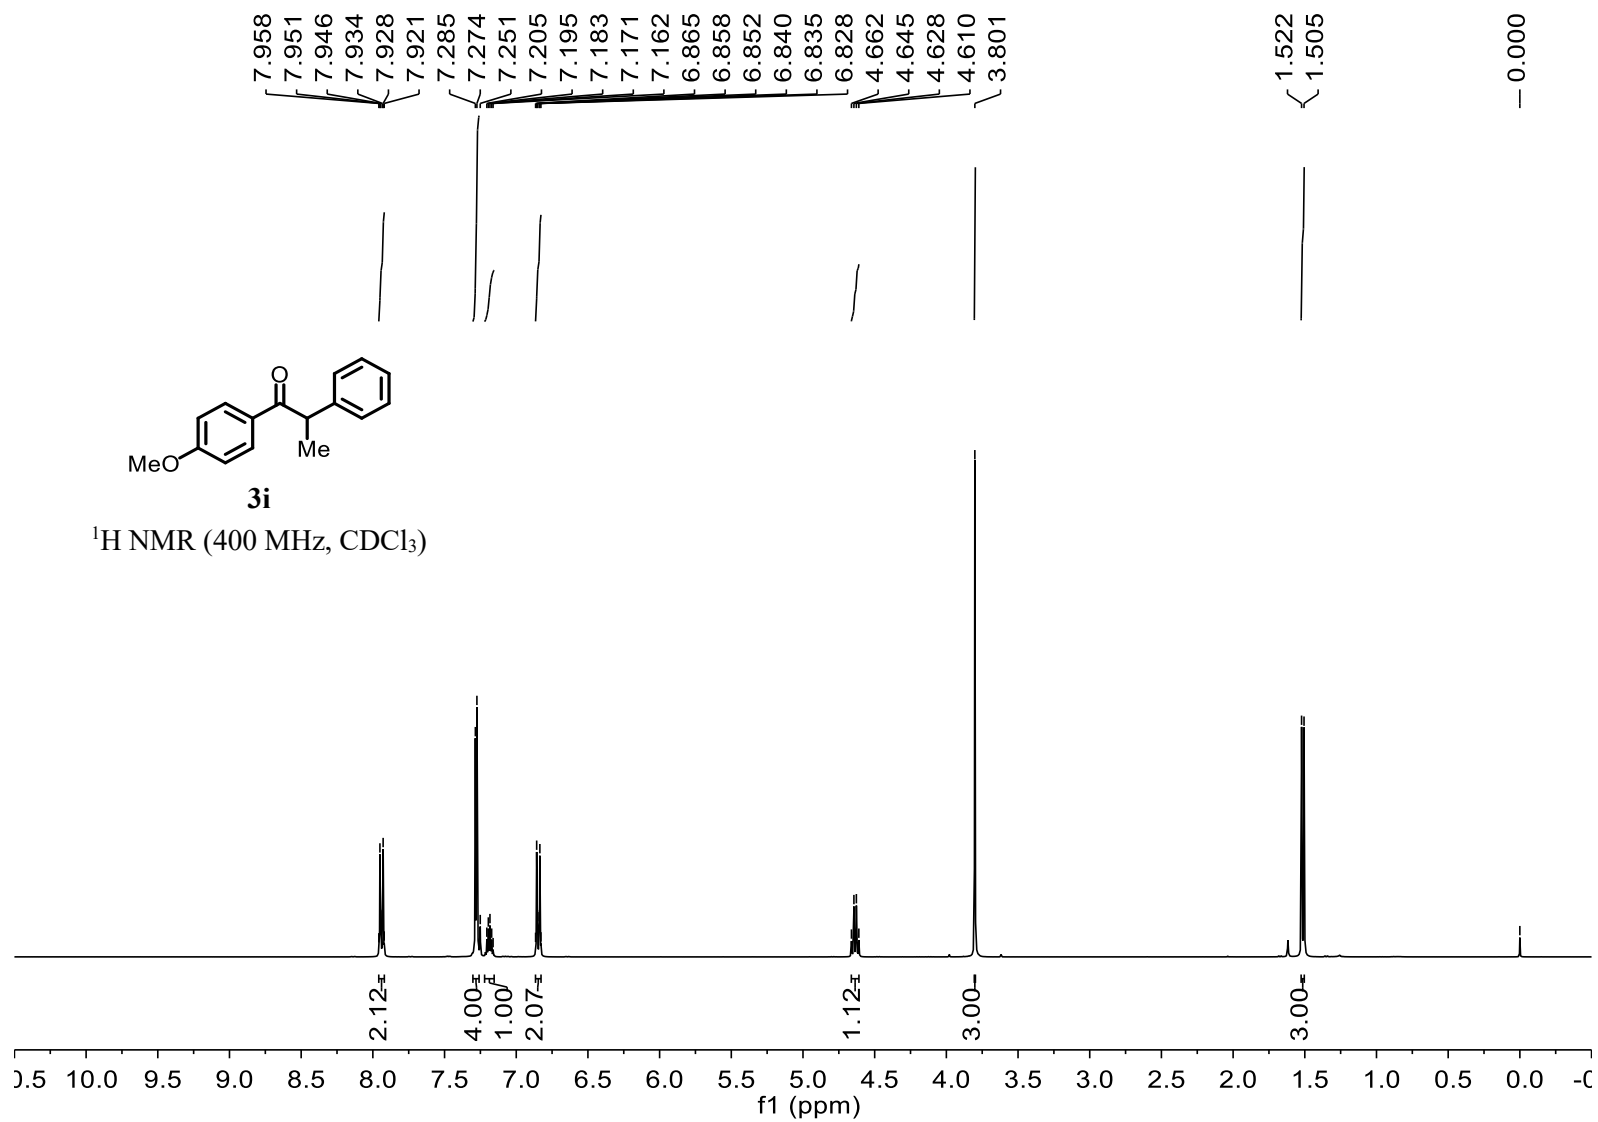

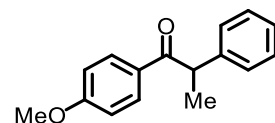

**3i**

$^{13}\text{C}$  NMR (100 MHz,  $\text{CDCl}_3$ )

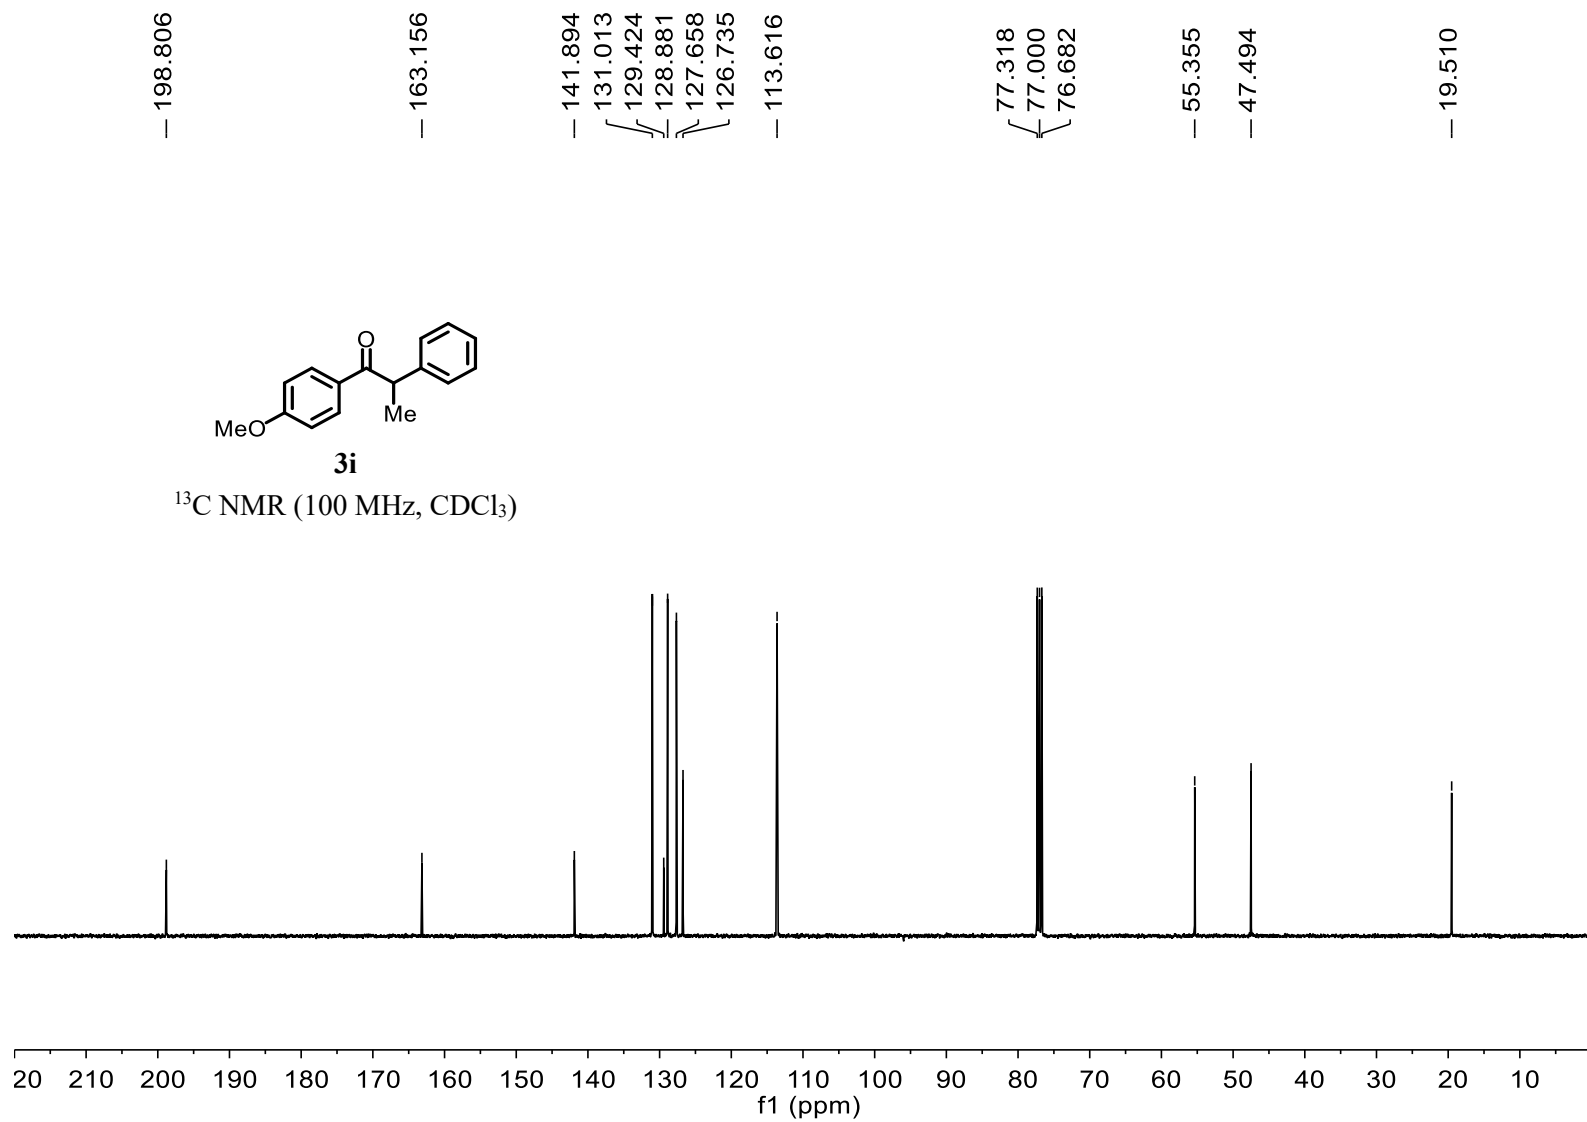

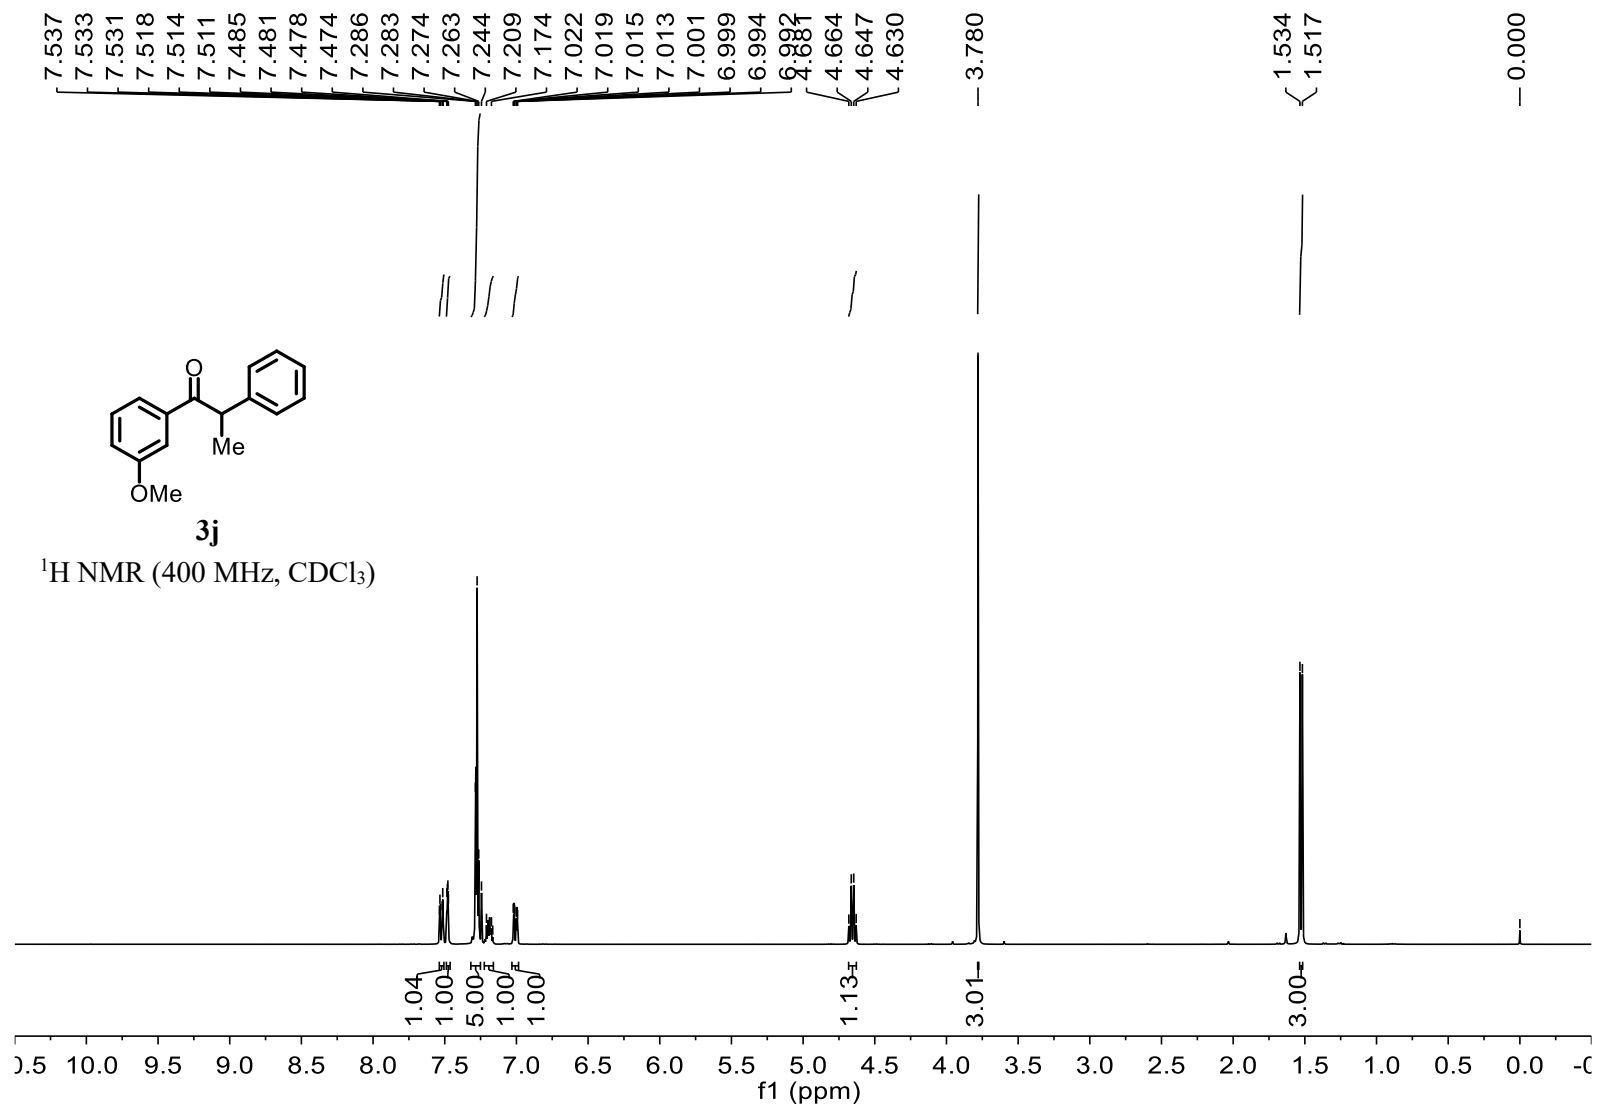

— 200.060  
 — 159.655  
 141.452  
 137.814  
 129.374  
 128.929  
 127.680  
 126.850  
 121.328  
 119.219  
 113.072  
 77.318  
 77.000  
 76.683  
 — 55.290  
 — 47.989  
 — 19.464

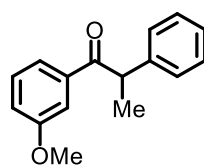

**3j**

$^{13}\text{C}$  NMR (100 MHz,  $\text{CDCl}_3$ )

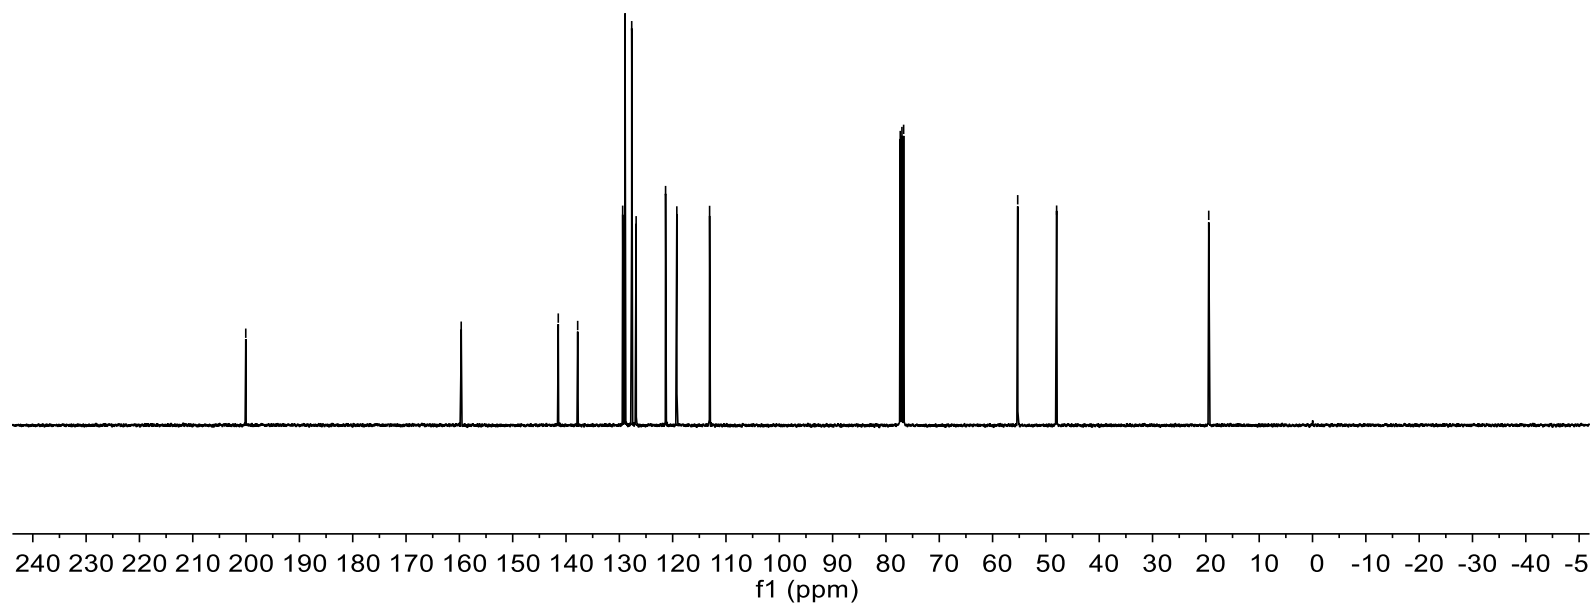

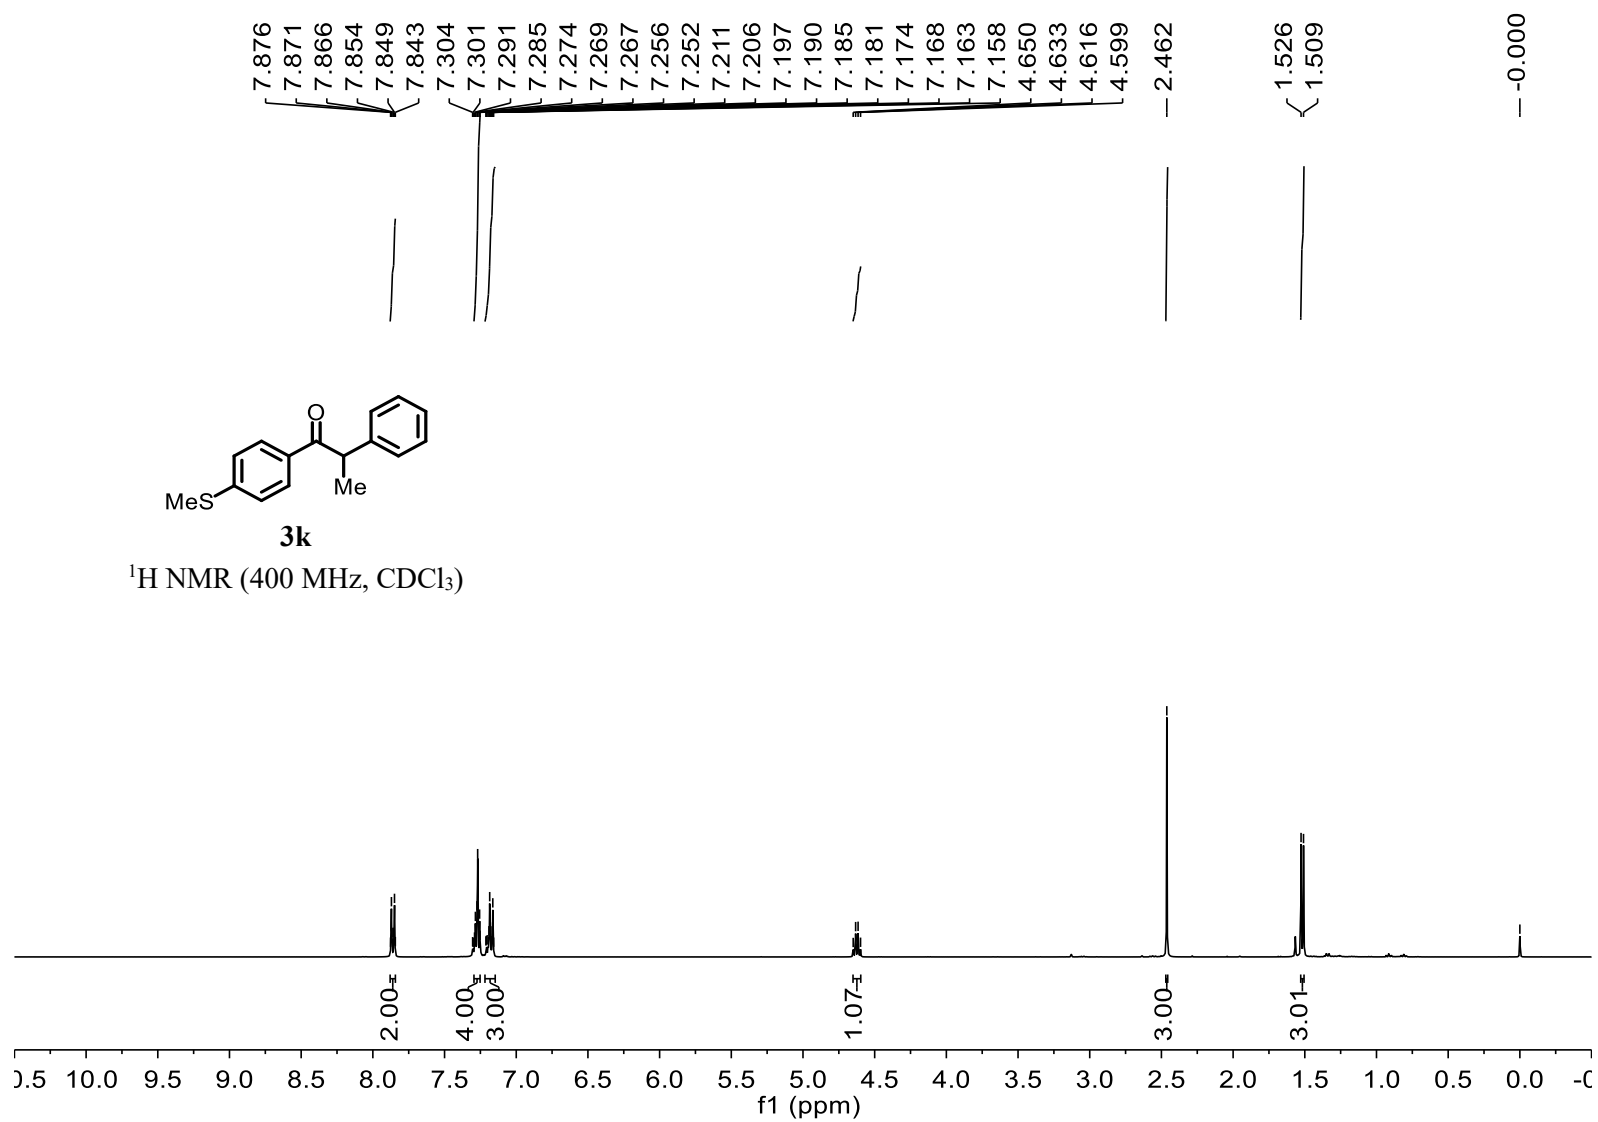



— 199.217

— 145.464  
— 141.636  
132.691  
129.176  
128.954  
127.674  
126.838  
124.882

77.318  
77.000  
76.683

— 47.713

— 19.452  
— 14.688

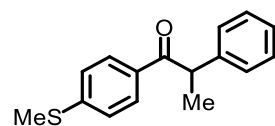

**3k**

<sup>13</sup>C NMR (100 MHz, CDCl<sub>3</sub>)

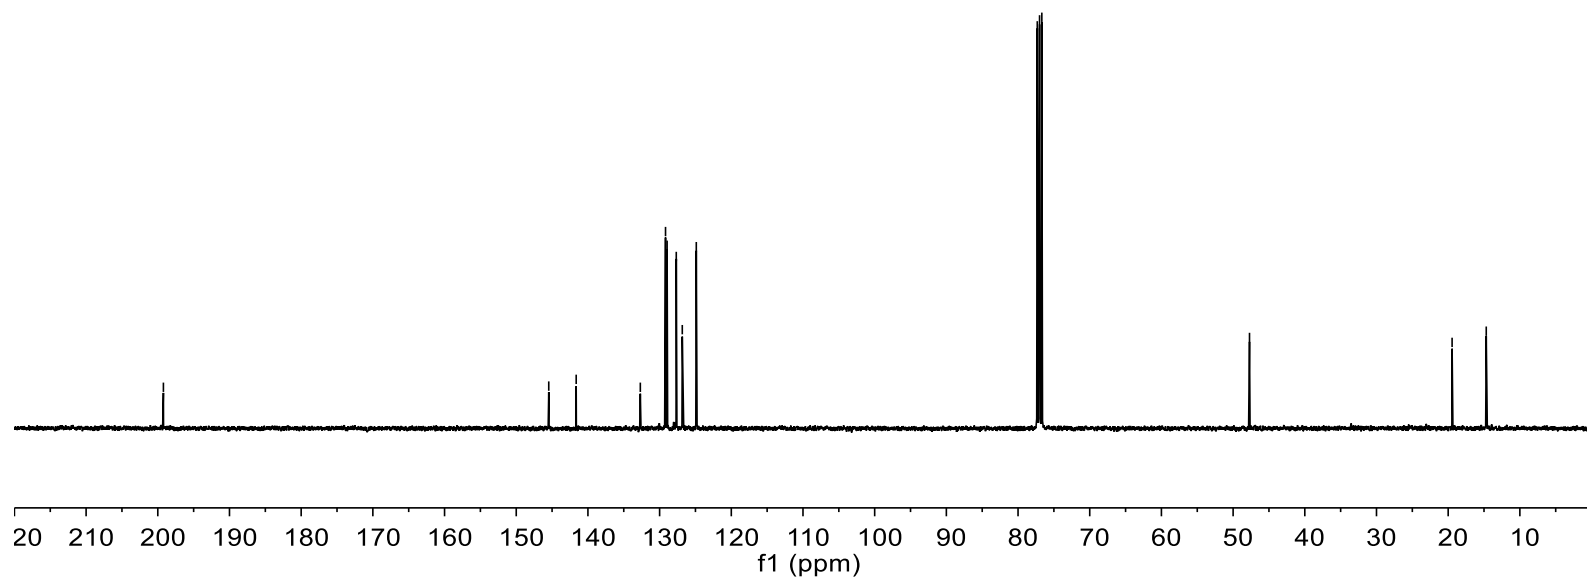

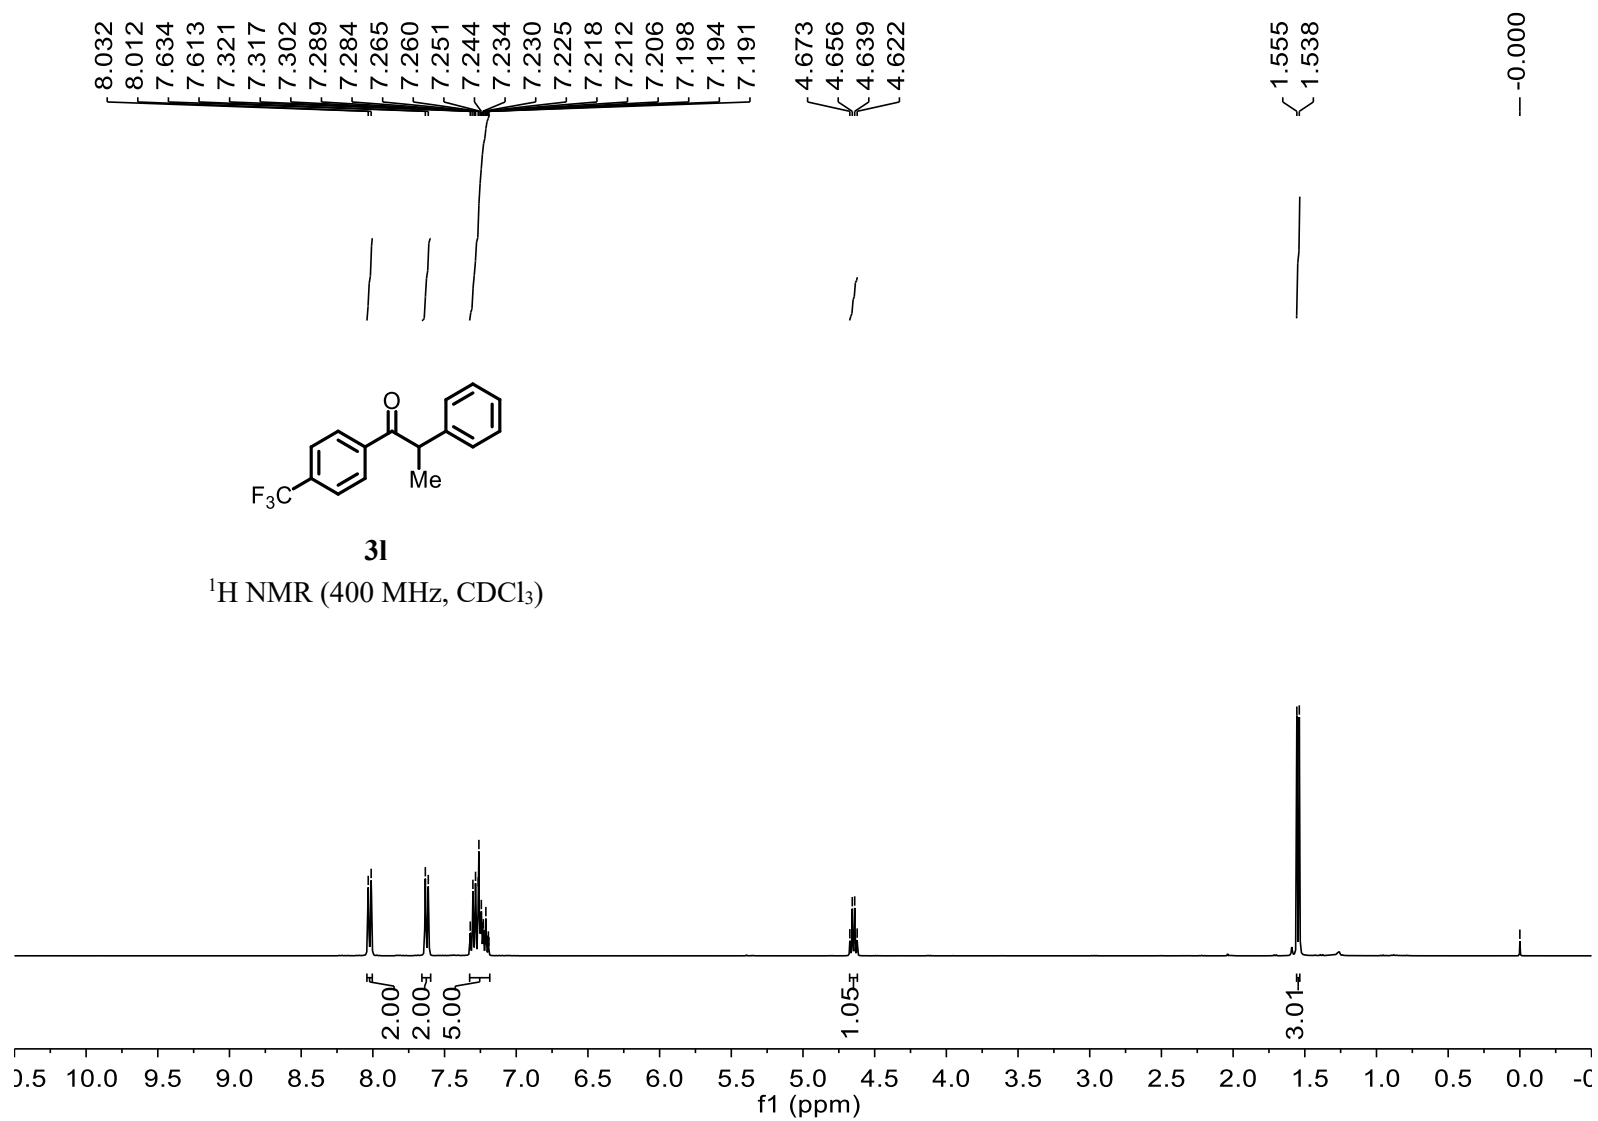

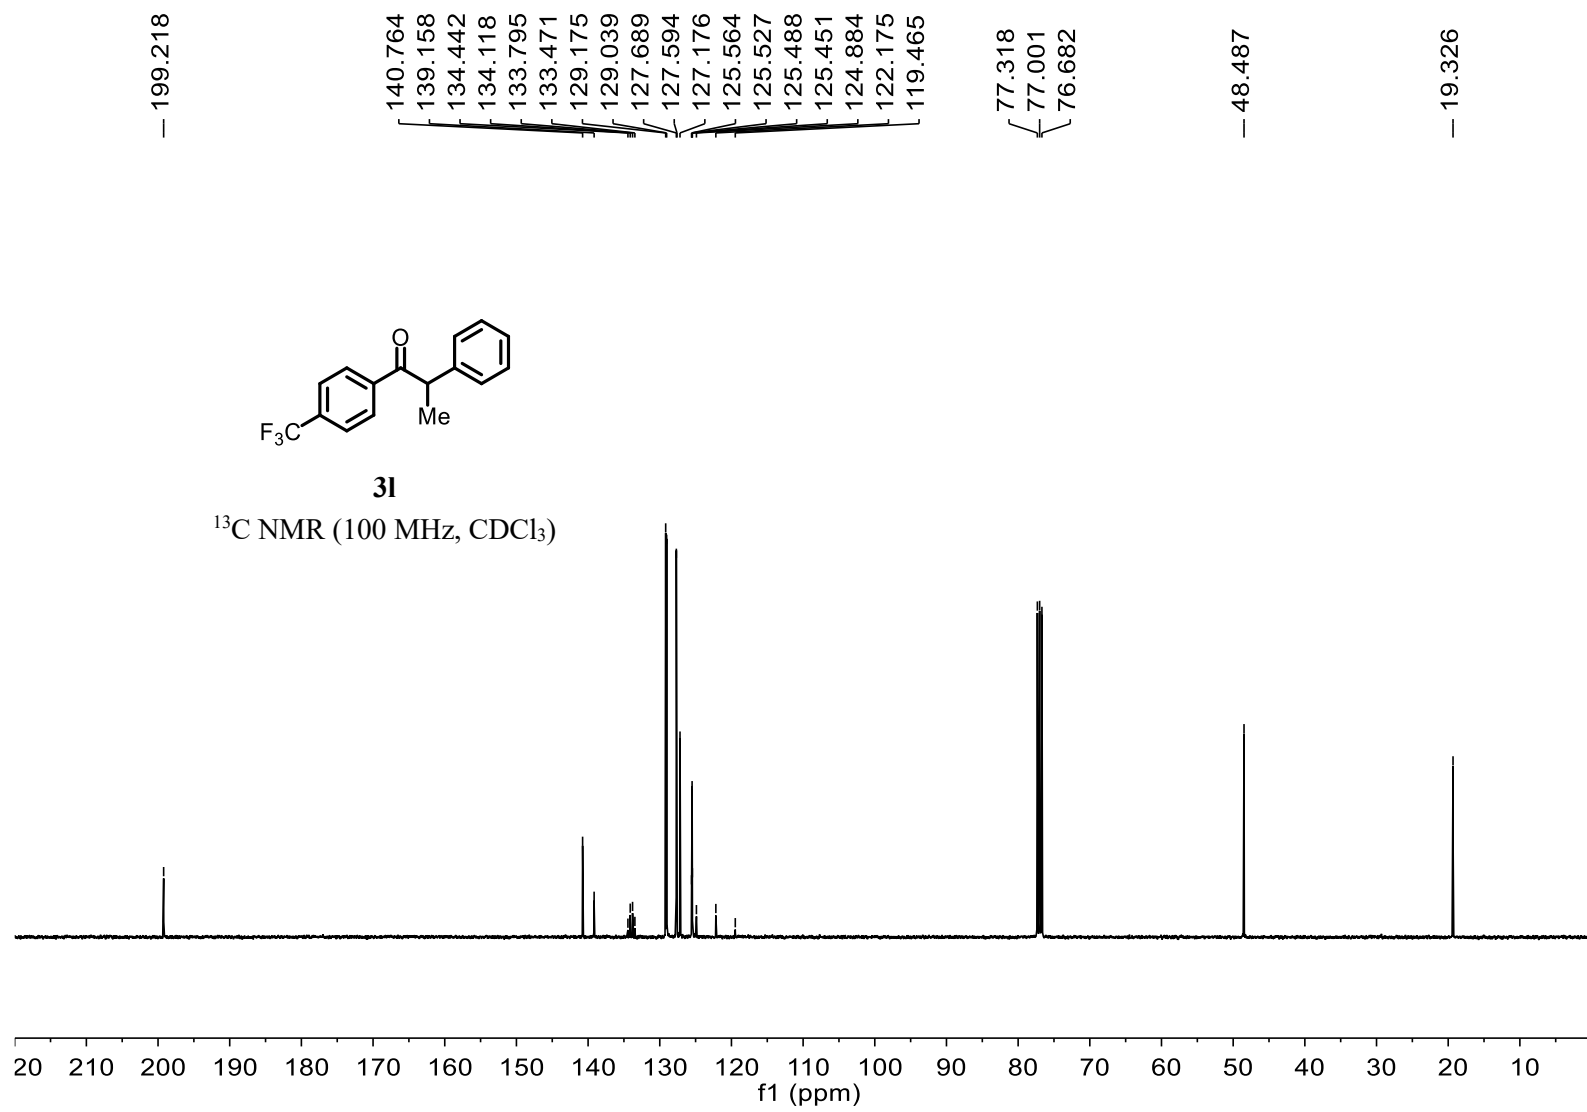

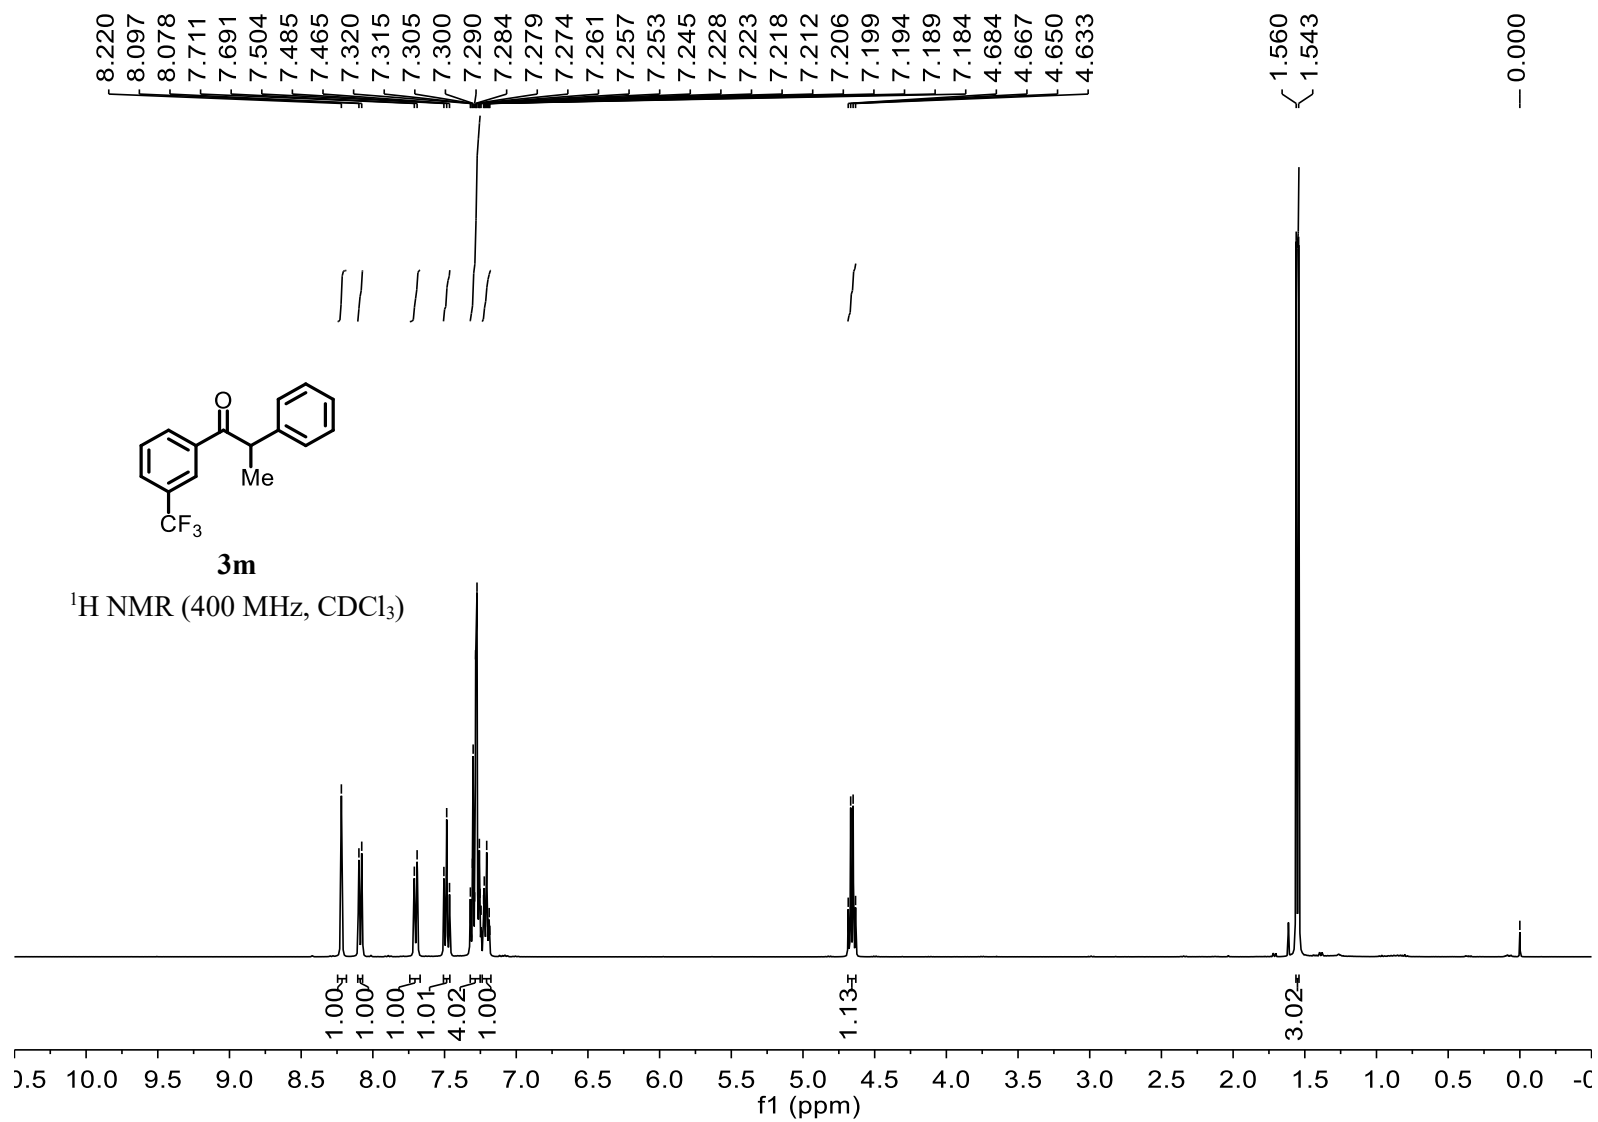

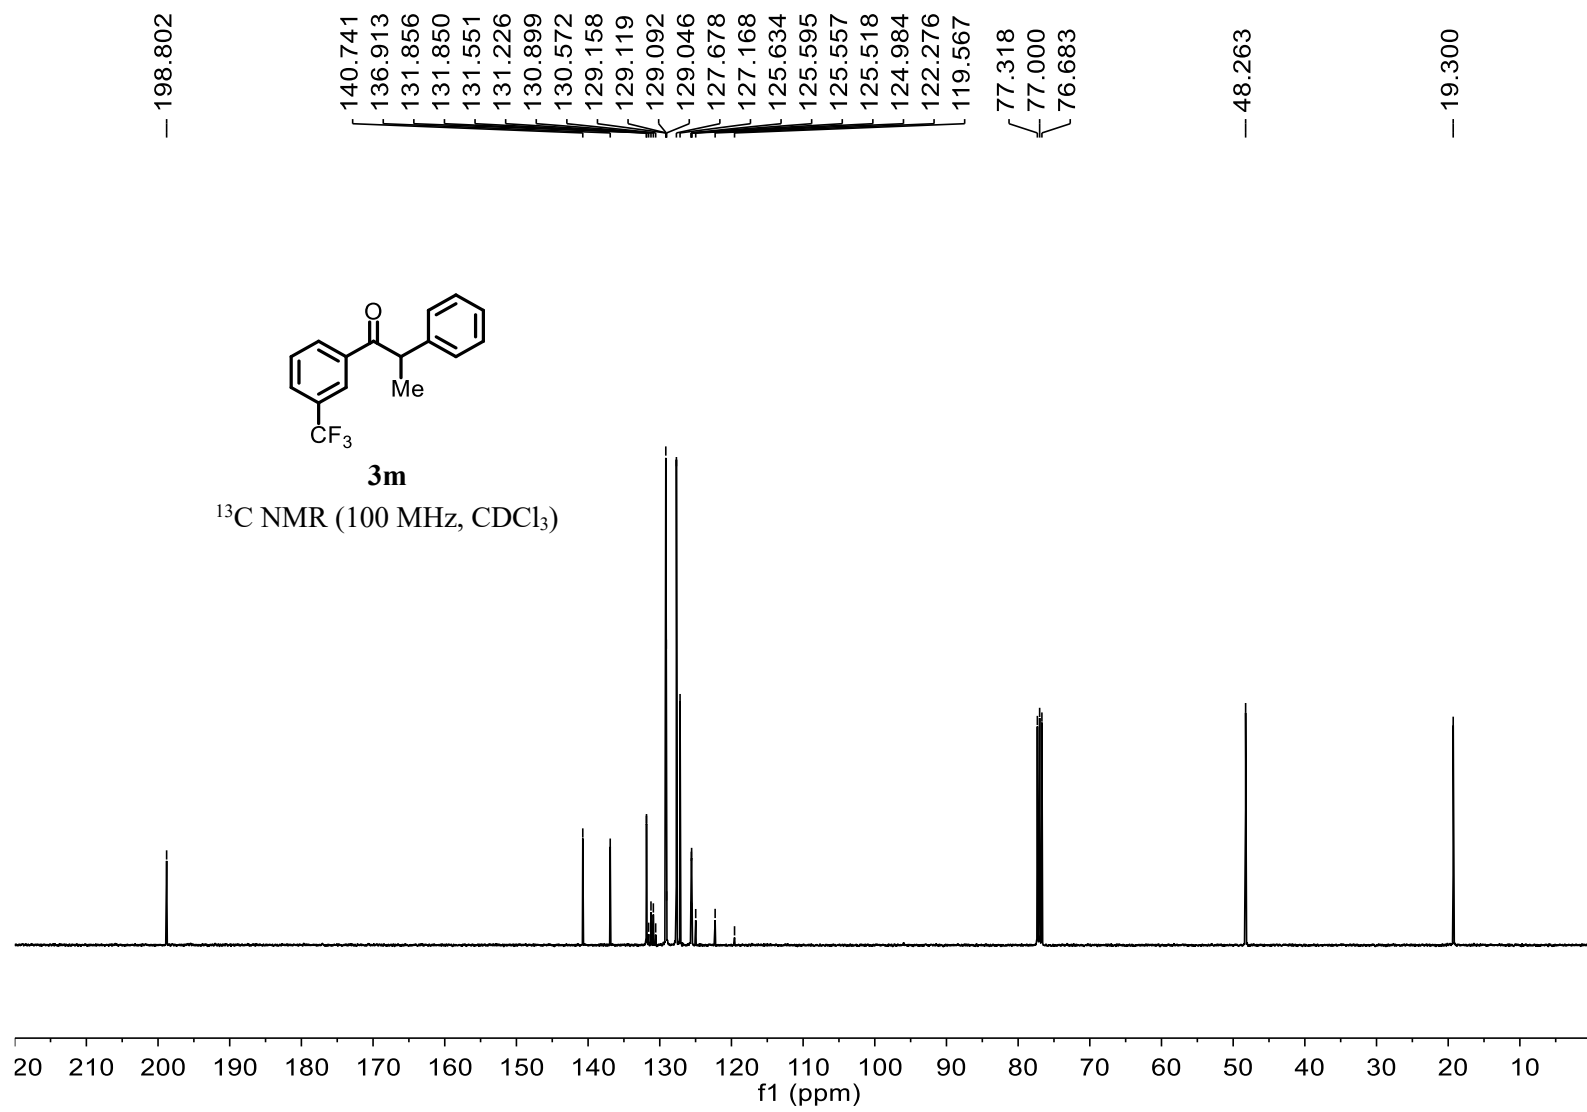

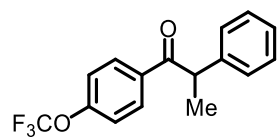

**3n**

<sup>1</sup>H NMR (400 MHz, CDCl<sub>3</sub>)

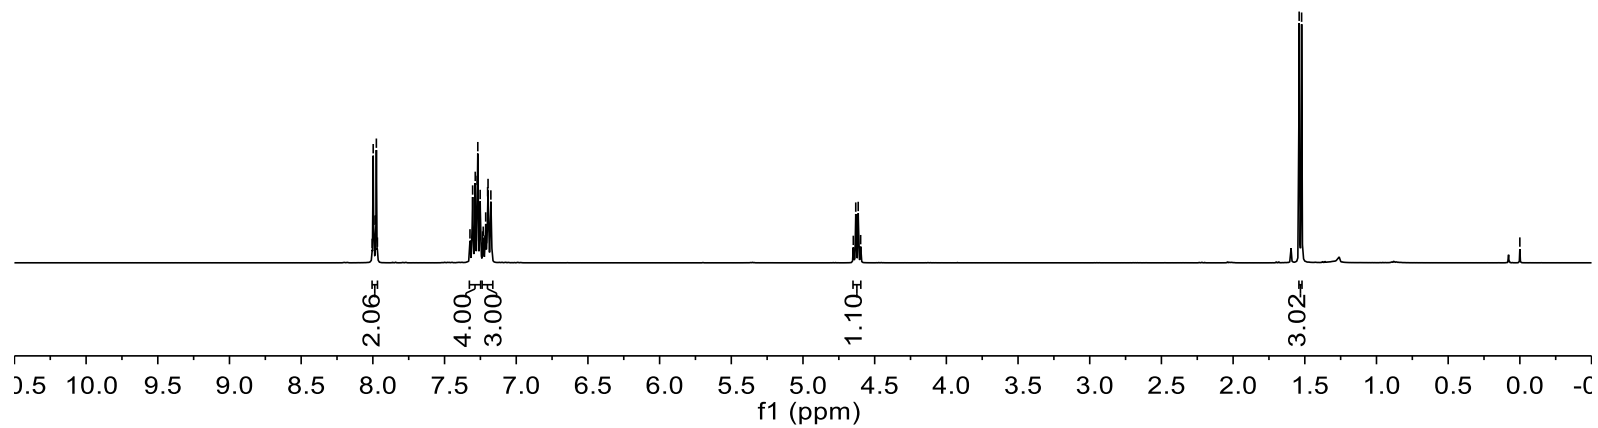

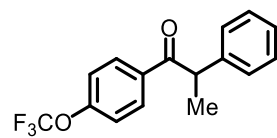

**3n**

<sup>13</sup>C NMR (100 MHz, CDCl<sub>3</sub>)

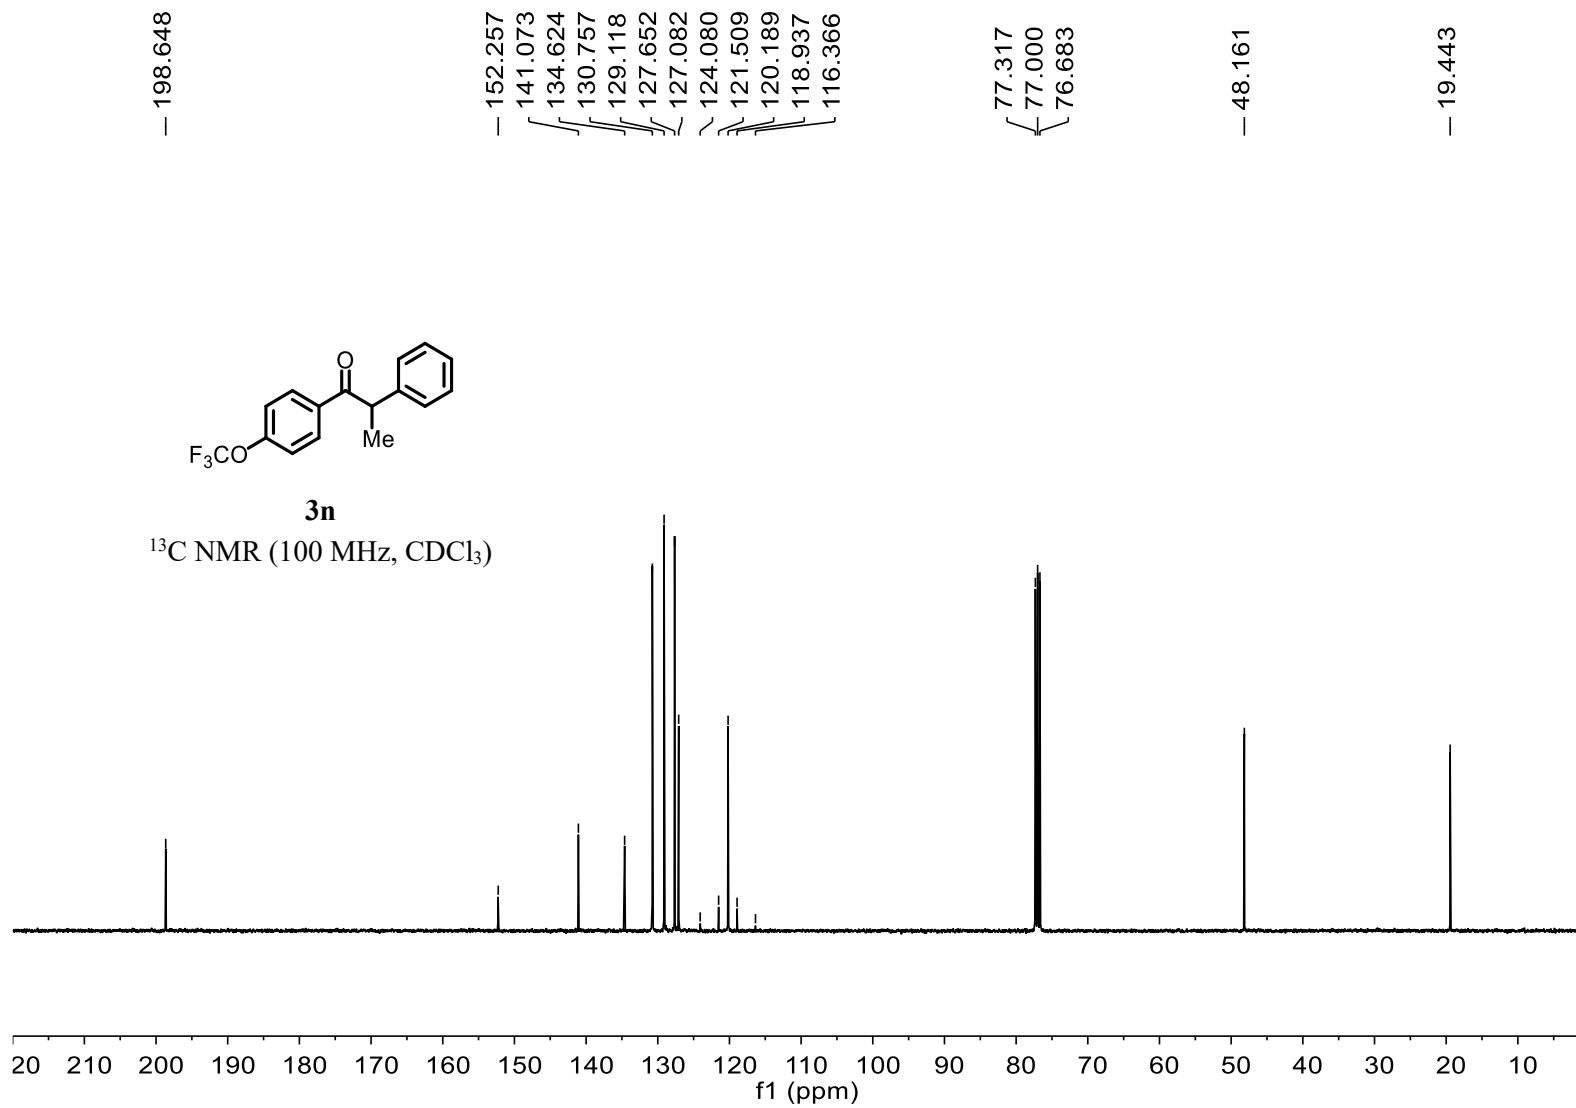

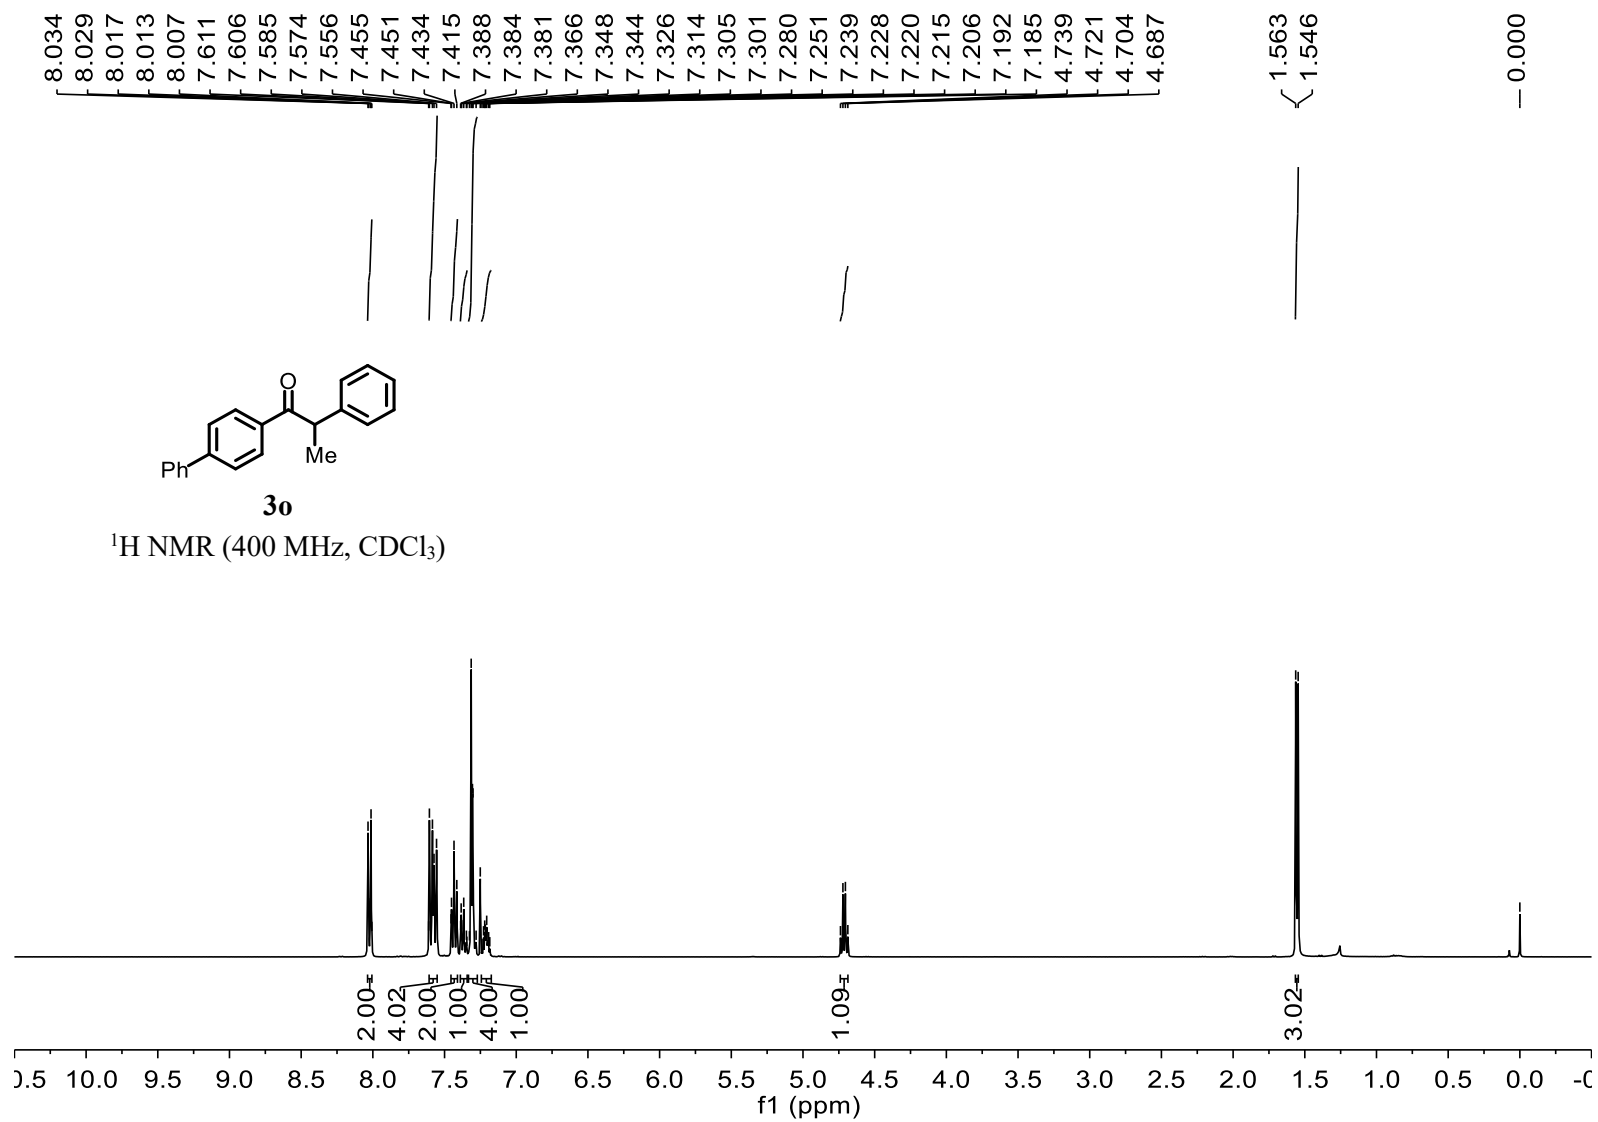



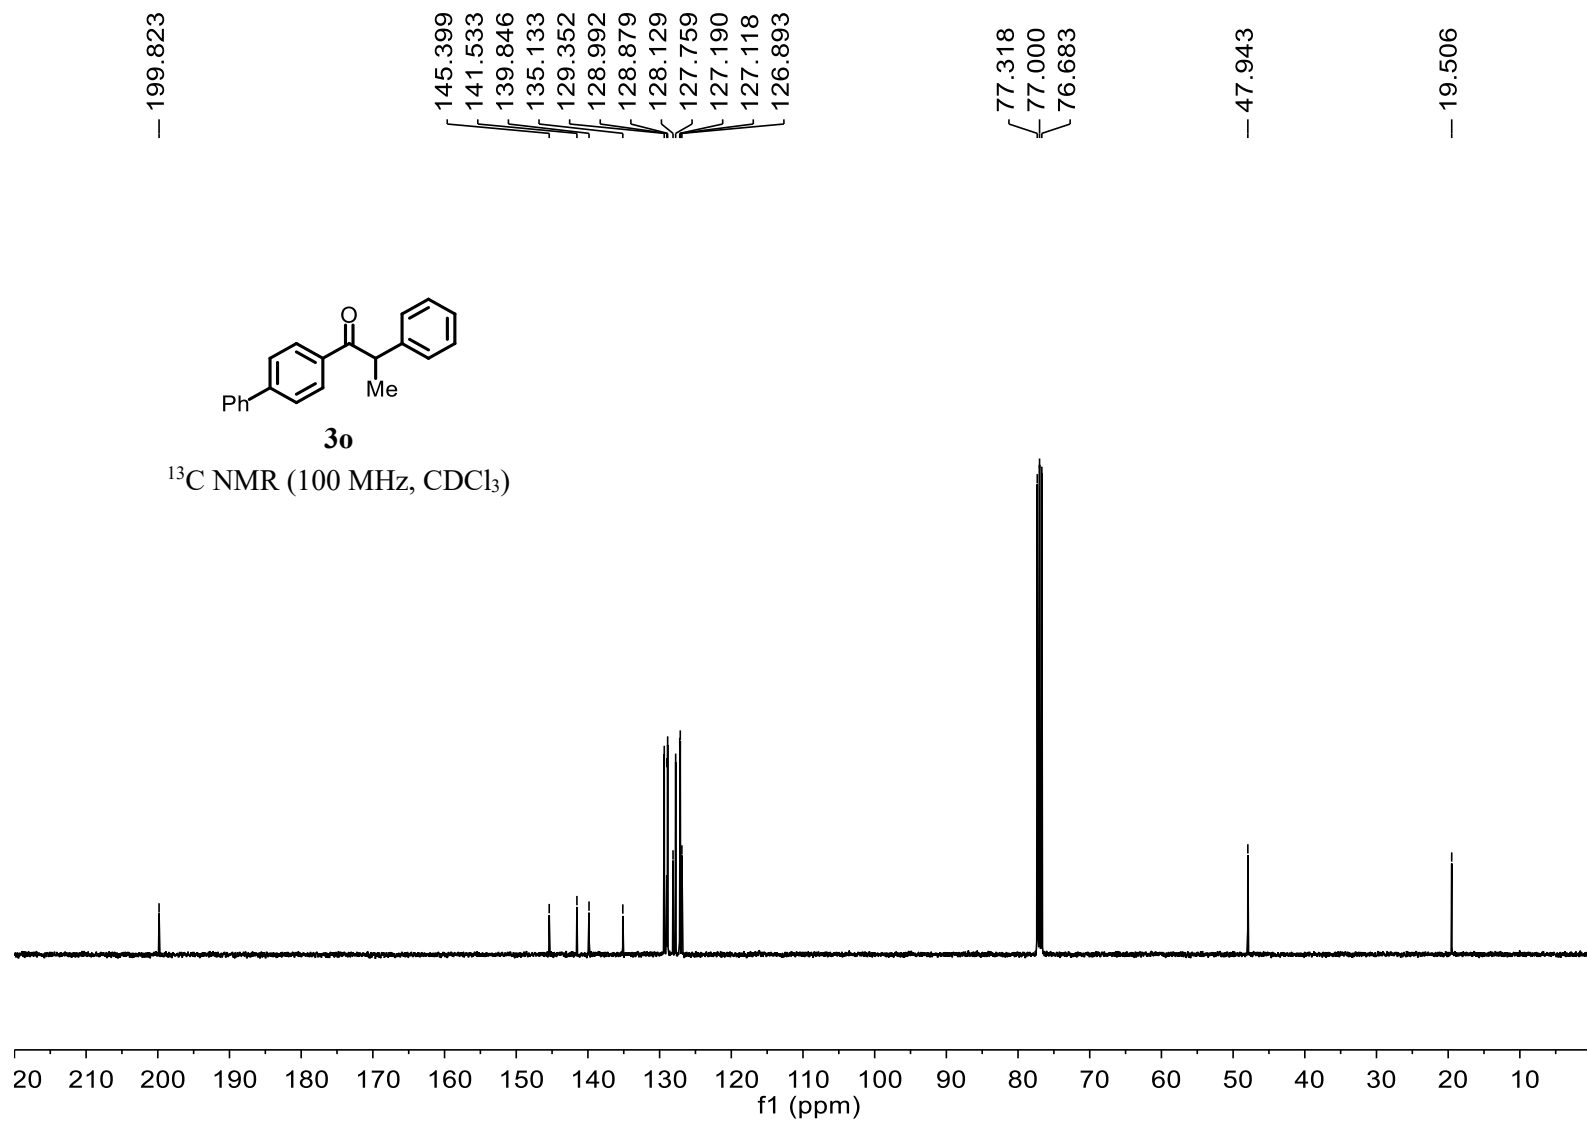

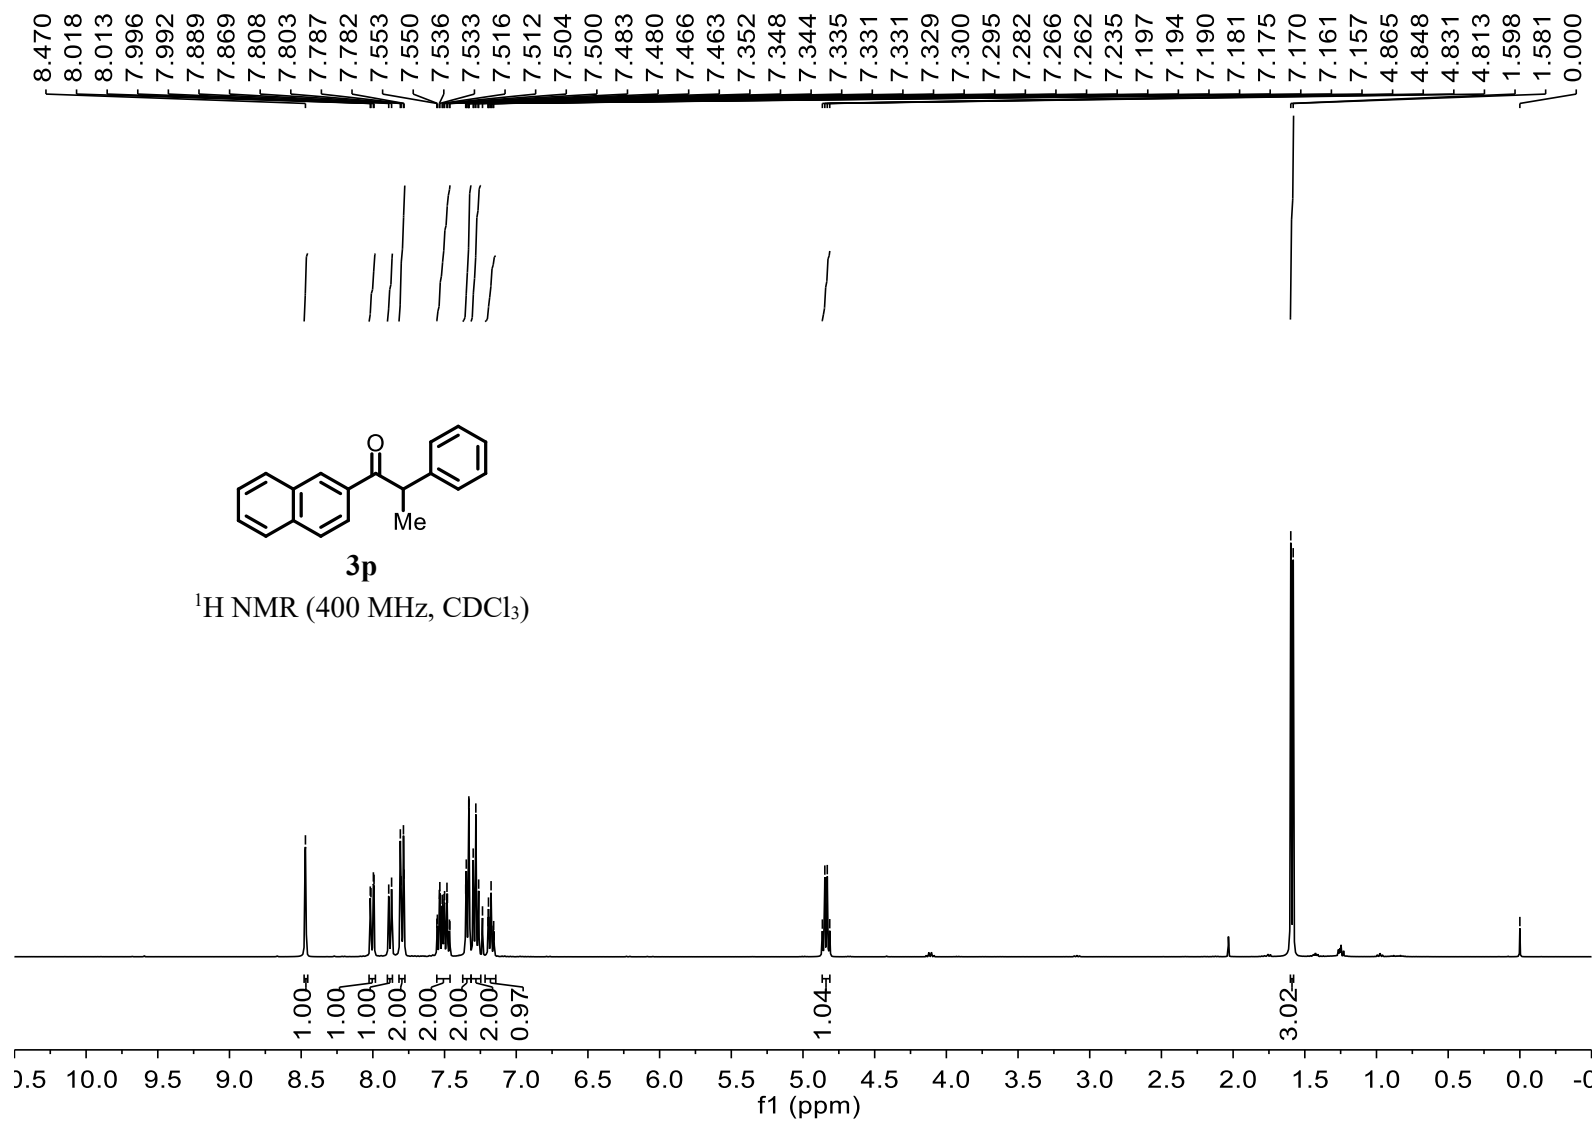

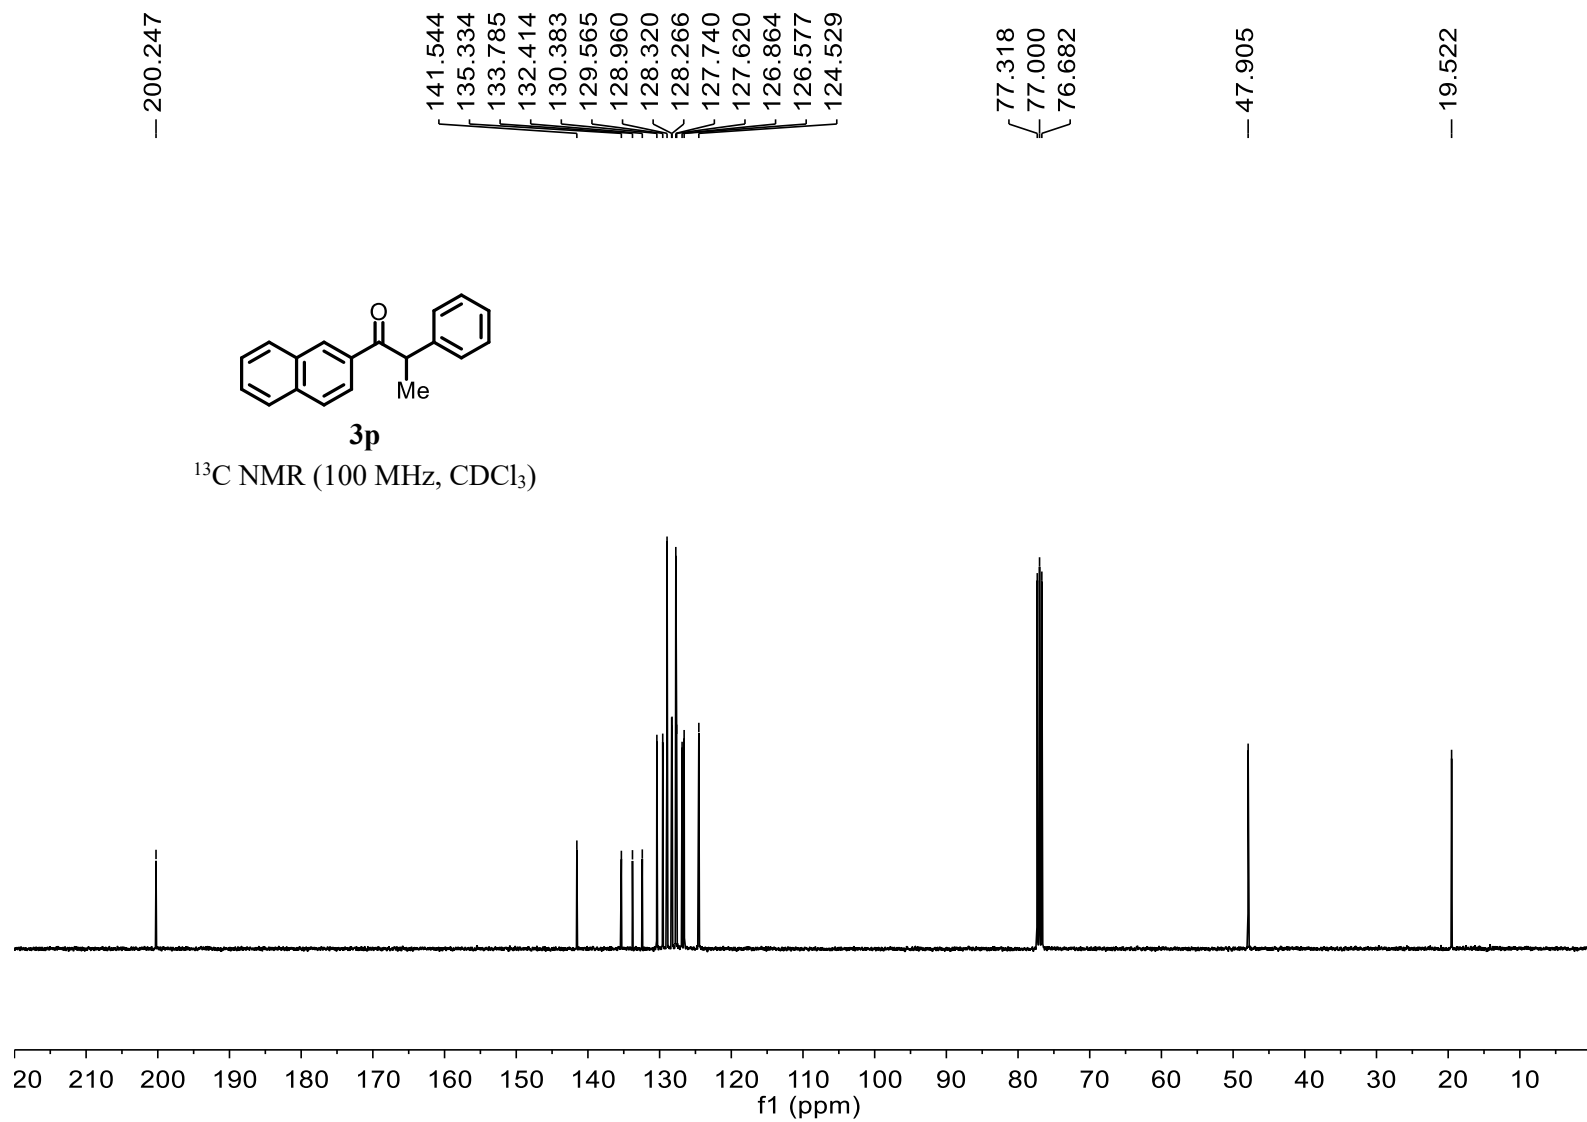

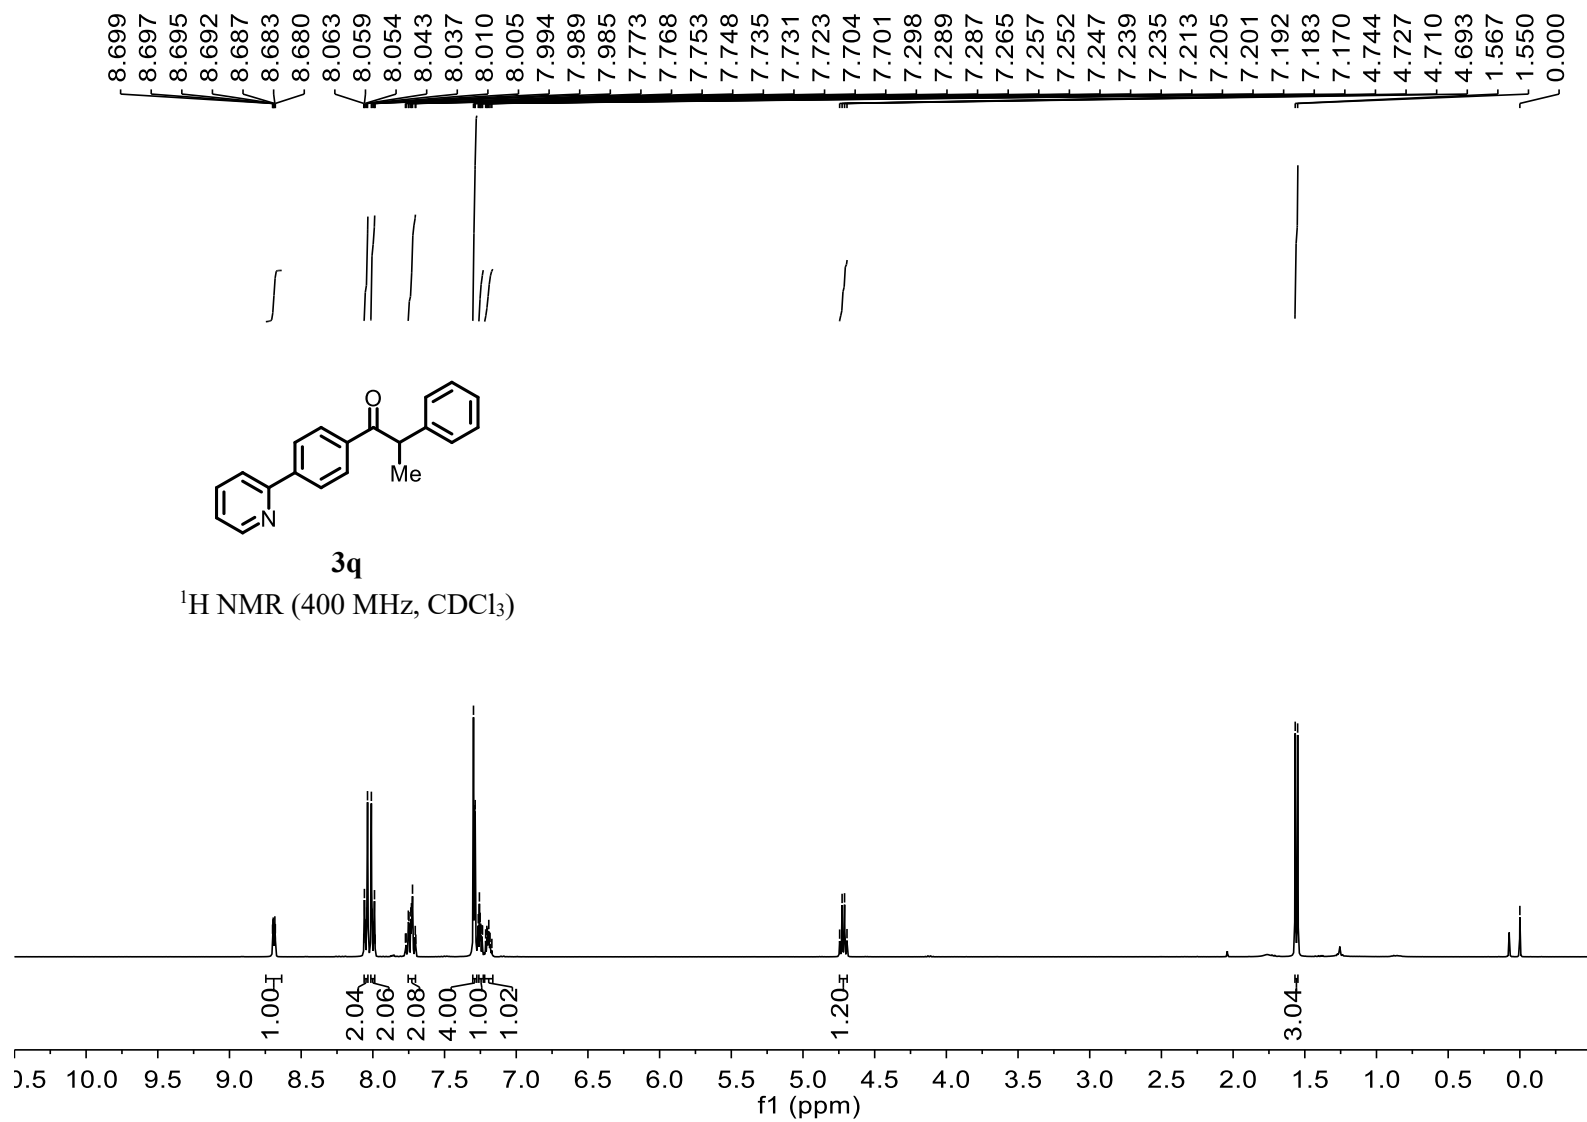

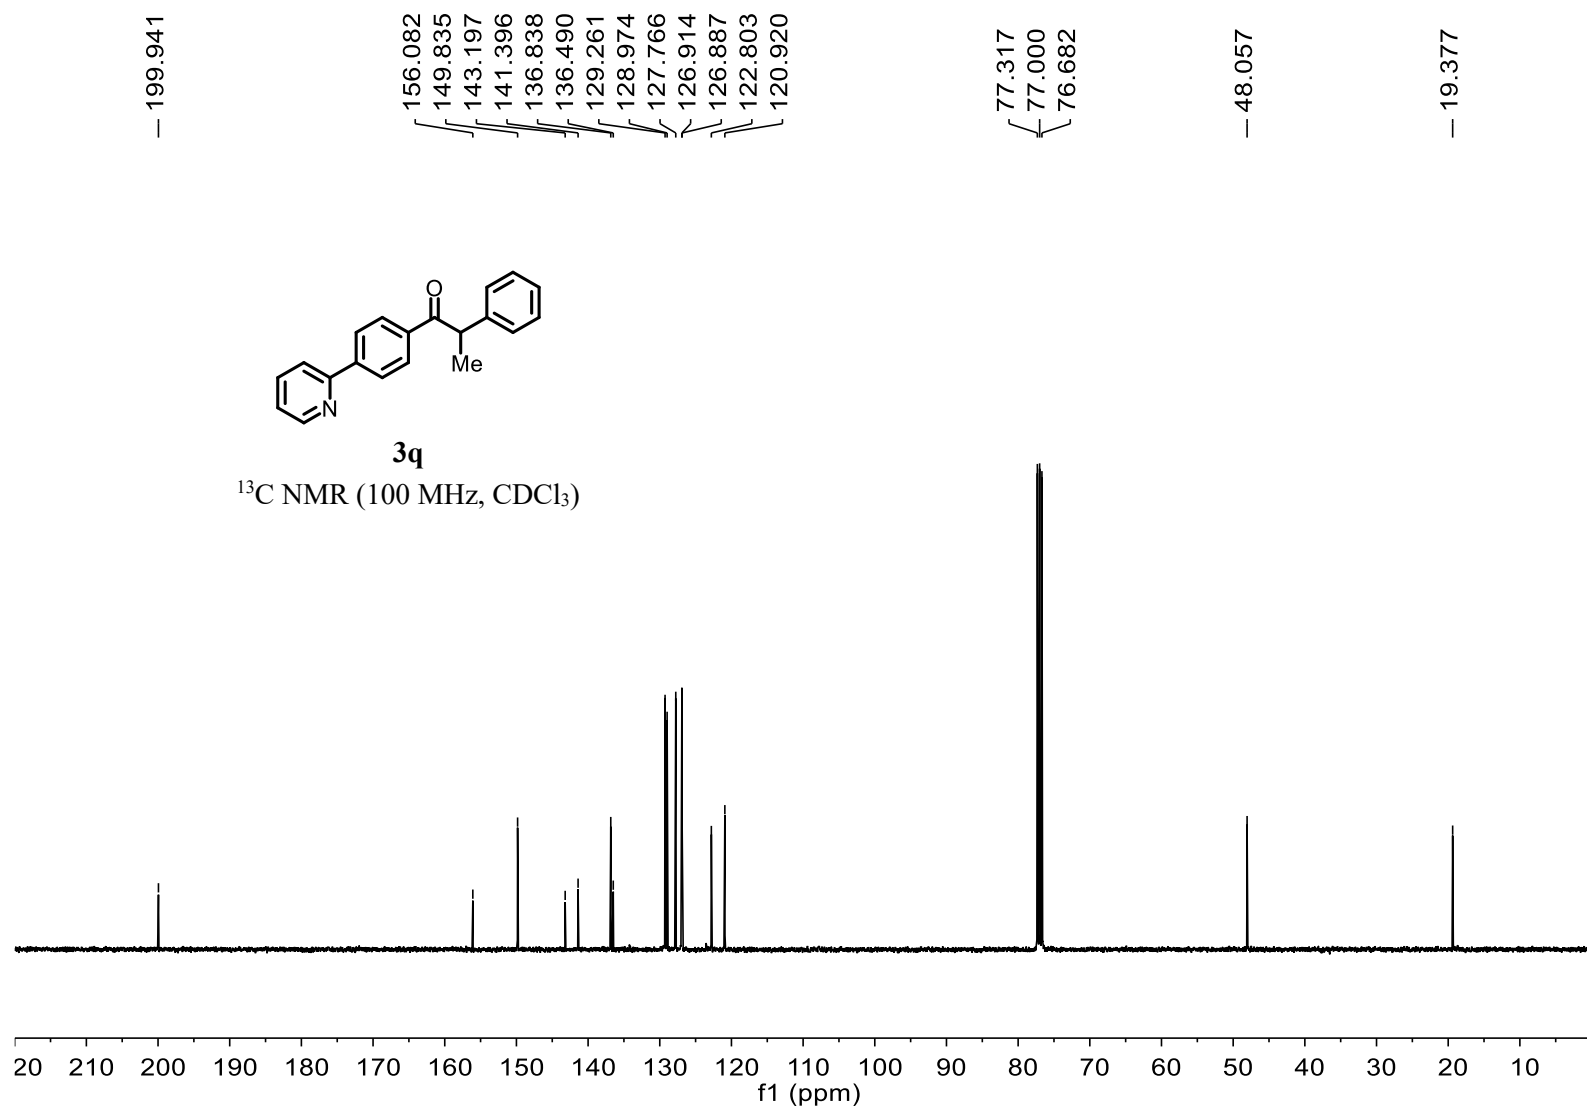

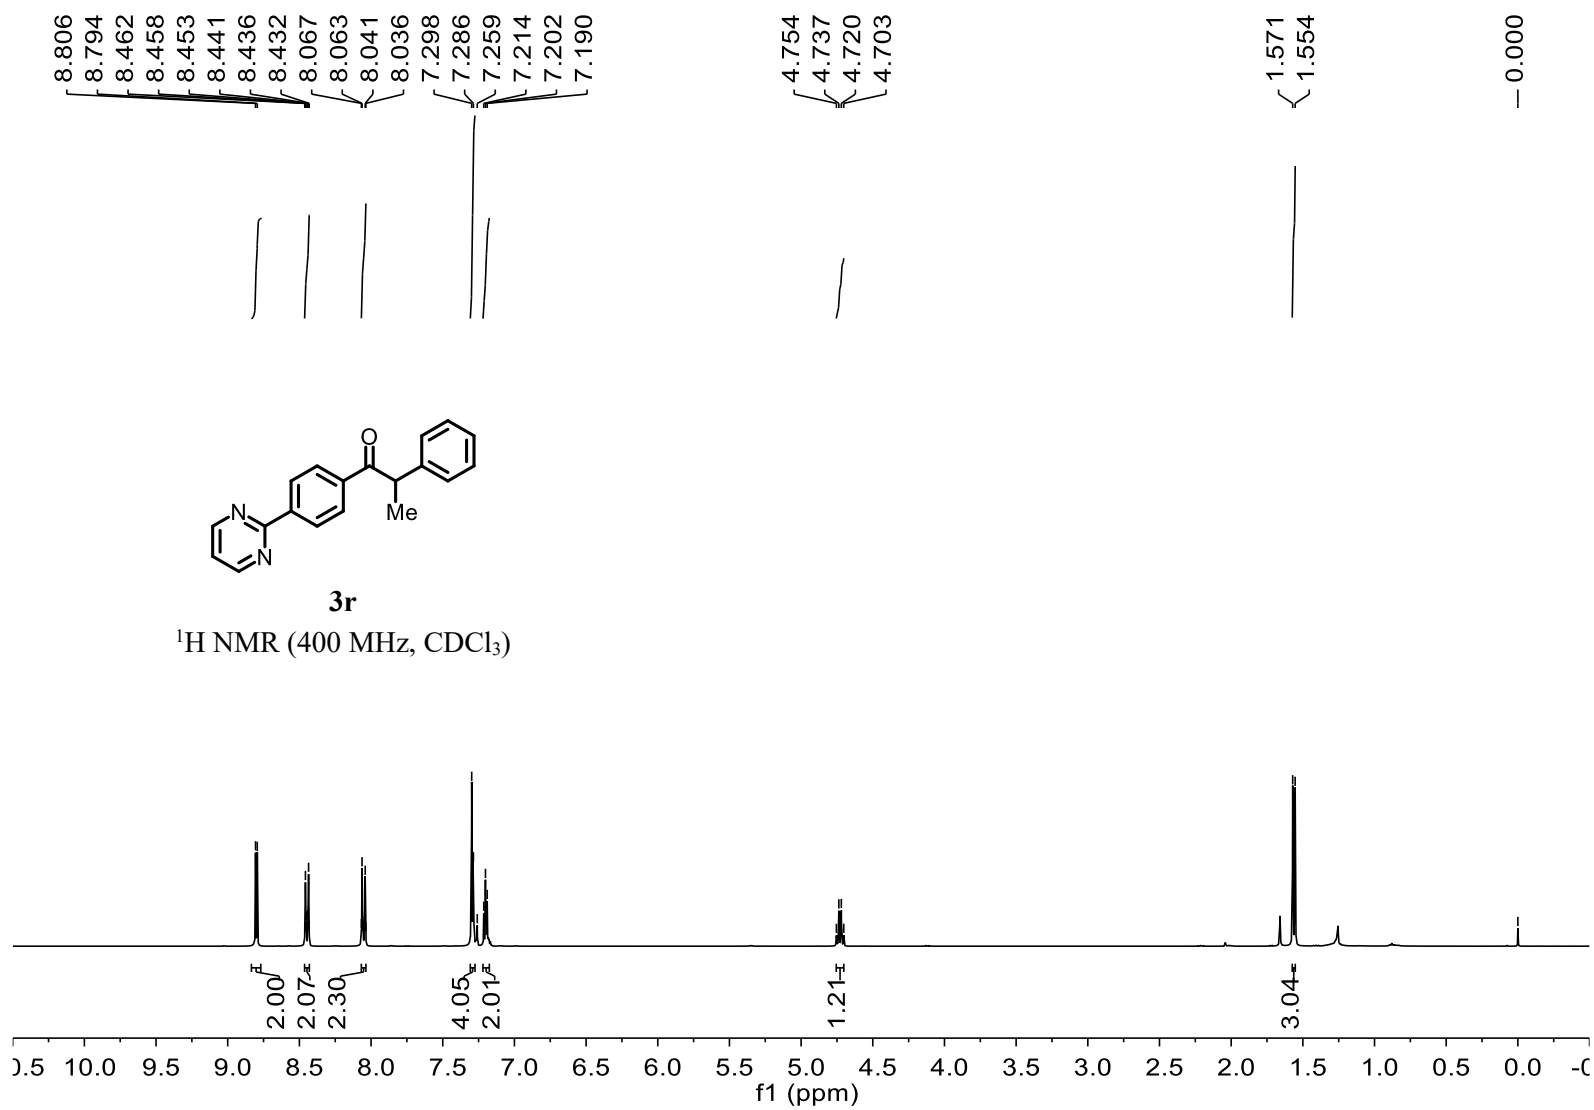

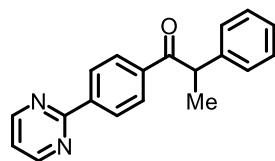

**3r**

$^{13}\text{C}$  NMR (100 MHz,  $\text{CDCl}_3$ )

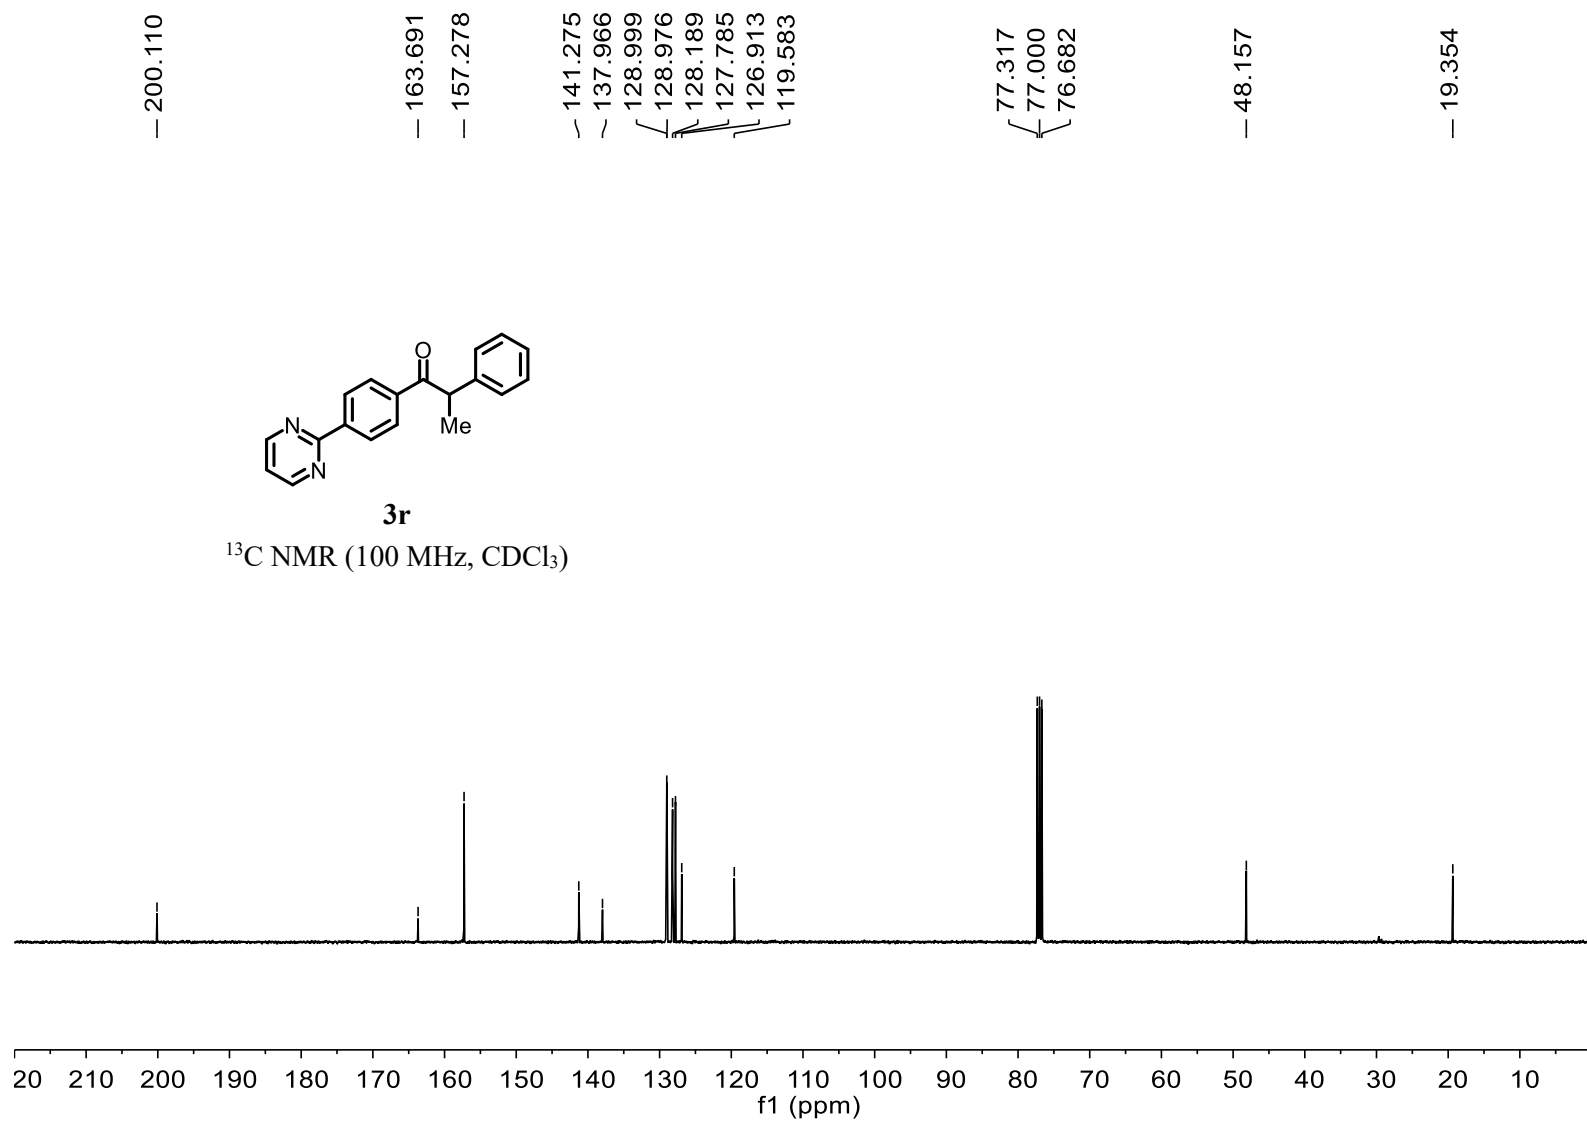

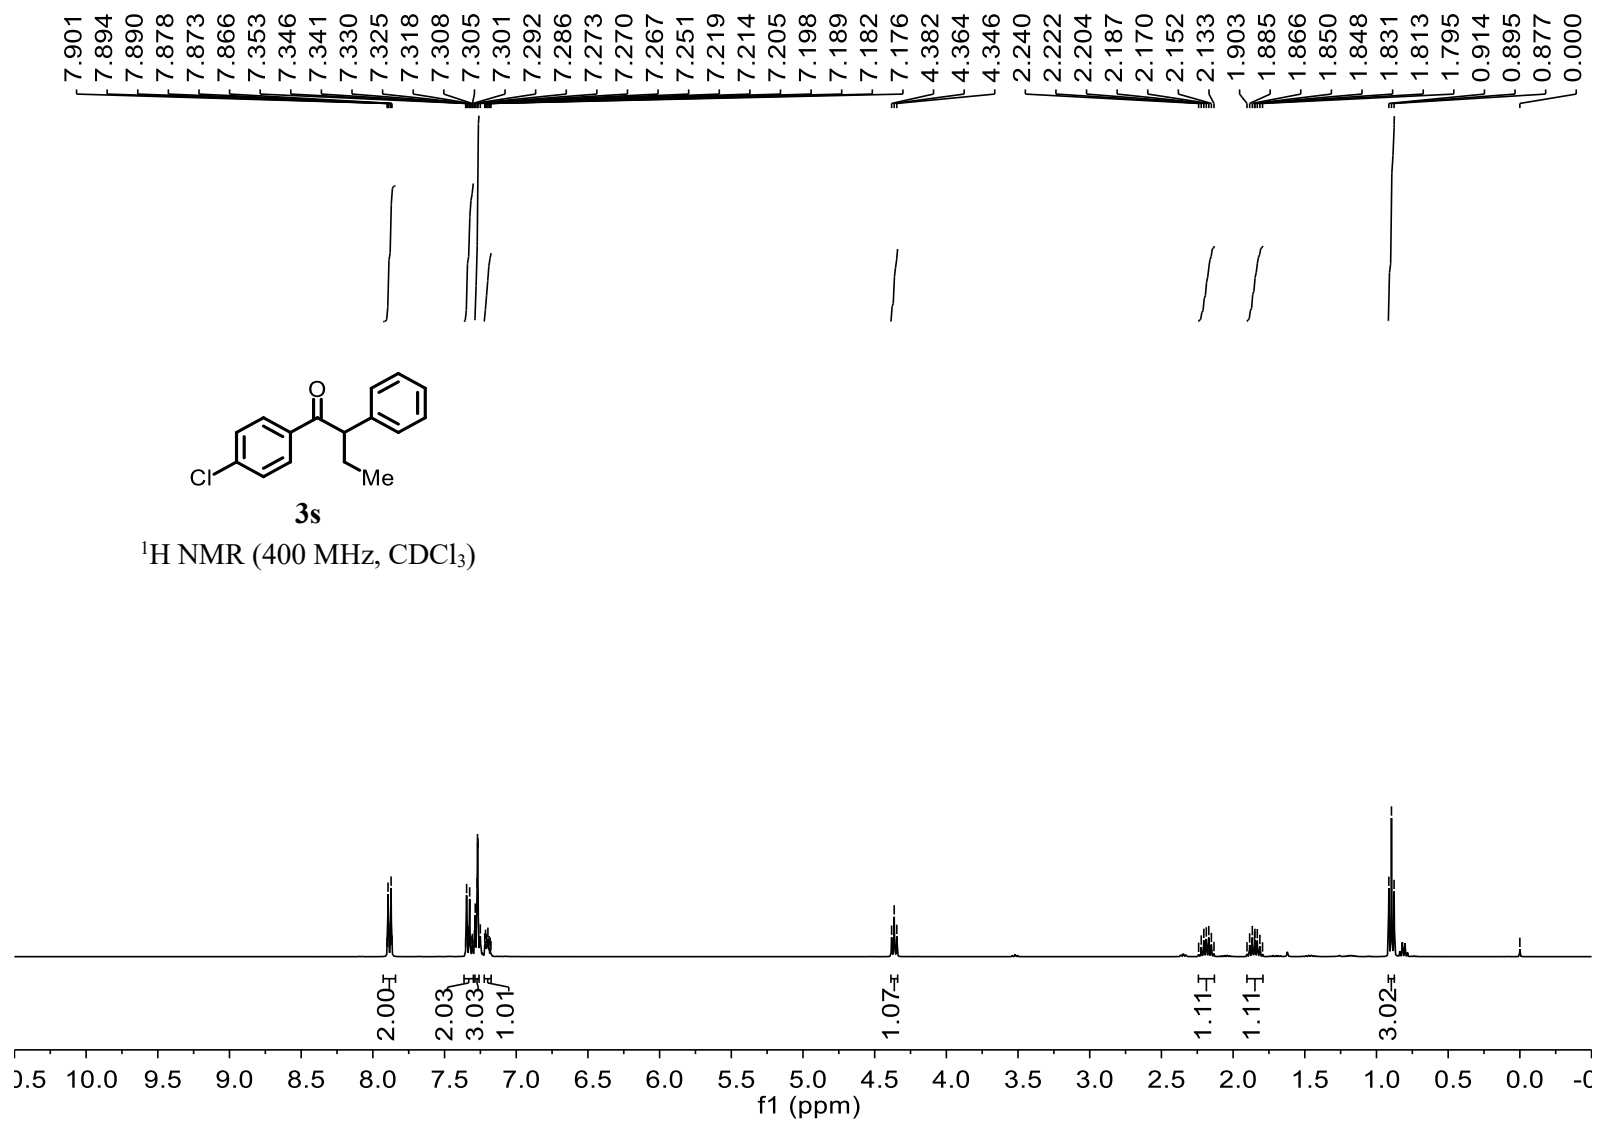



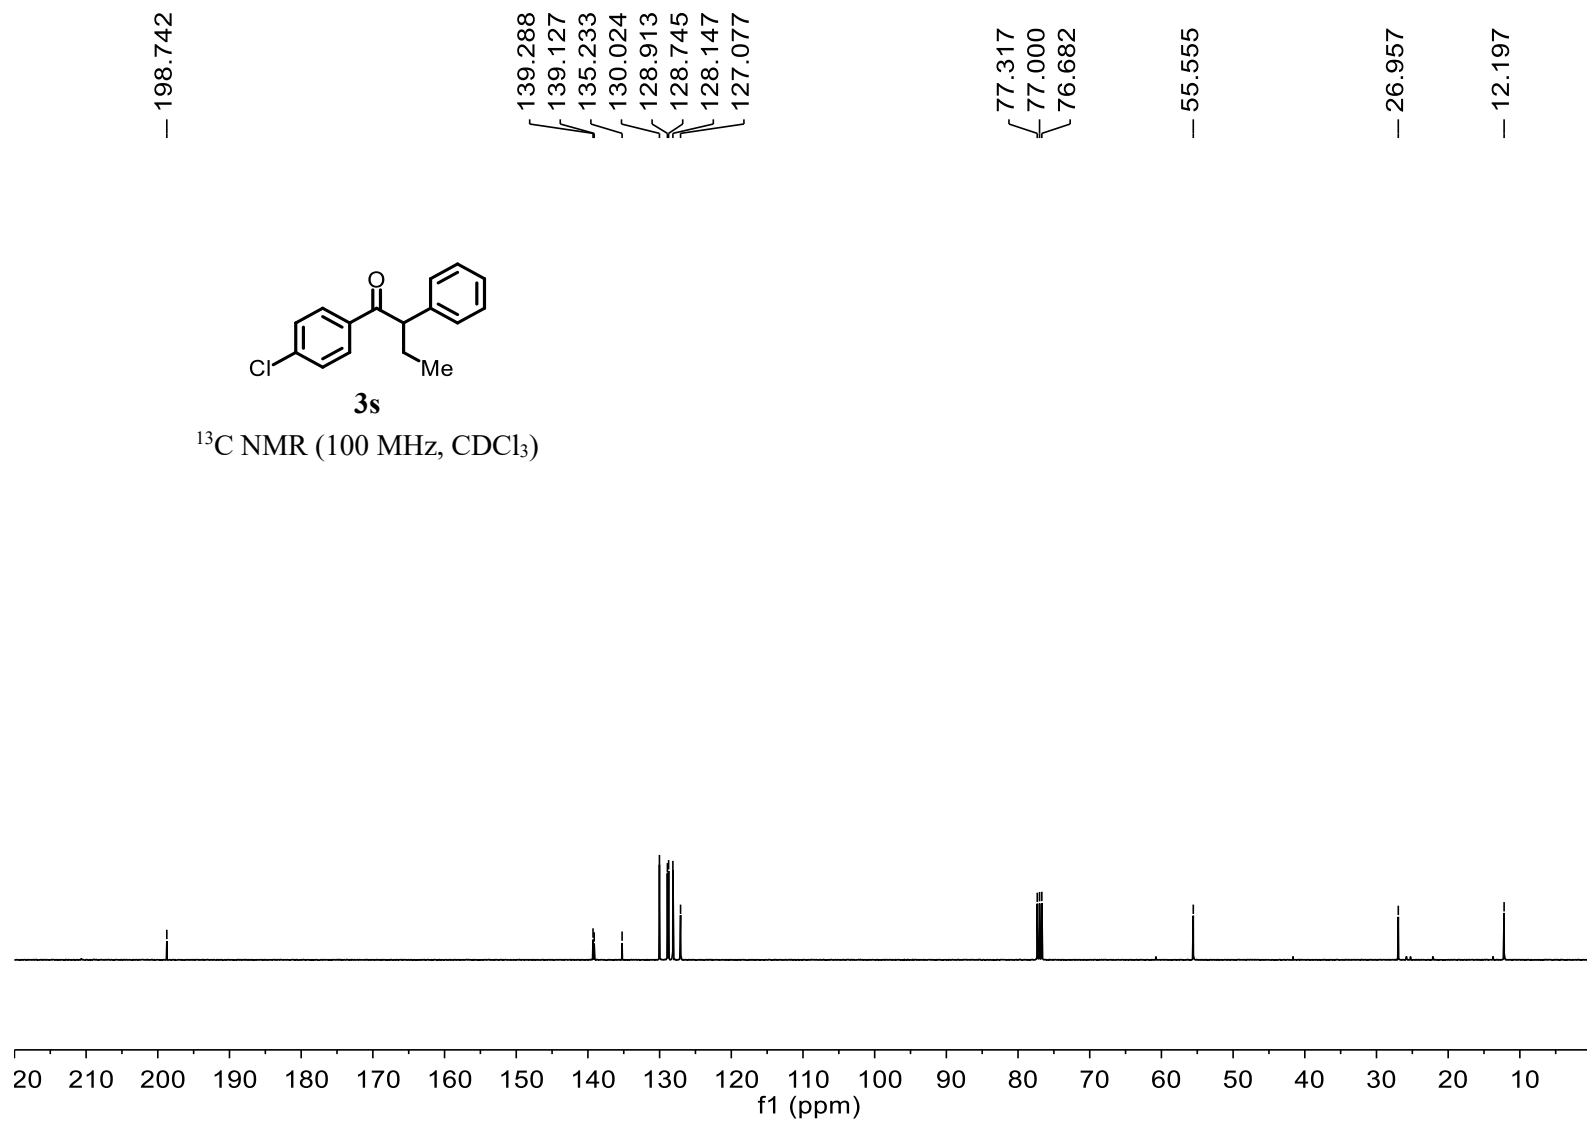

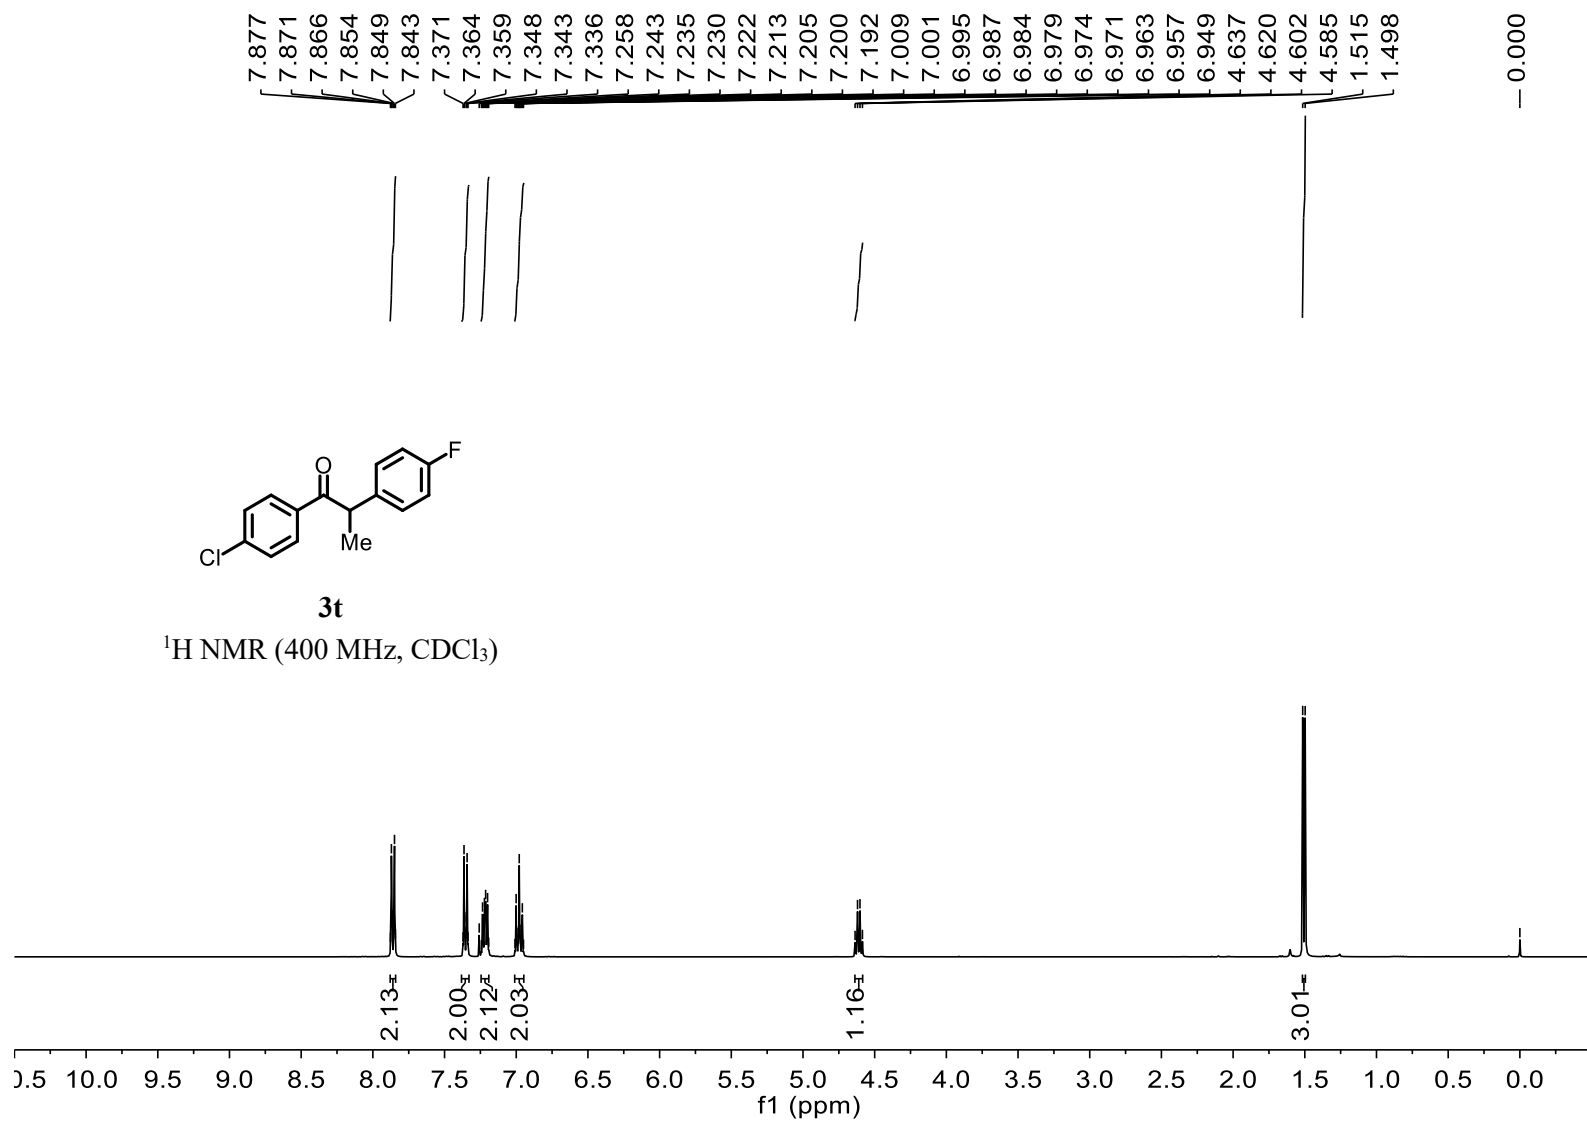

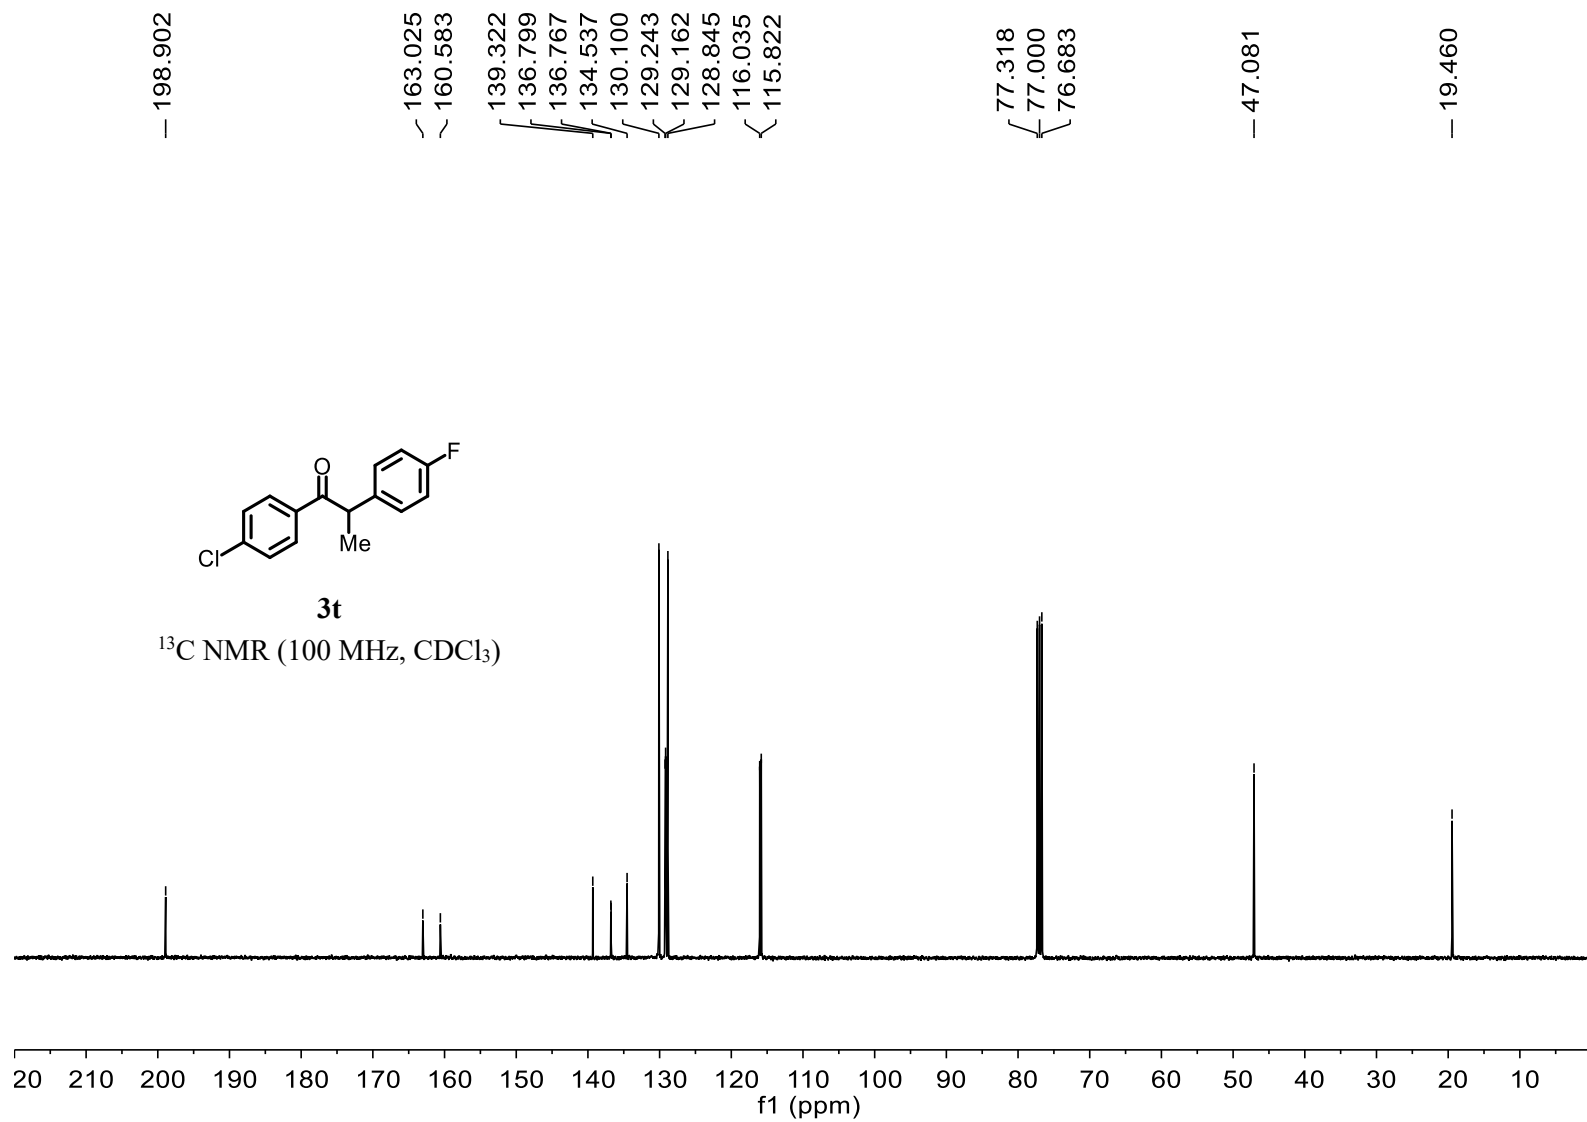

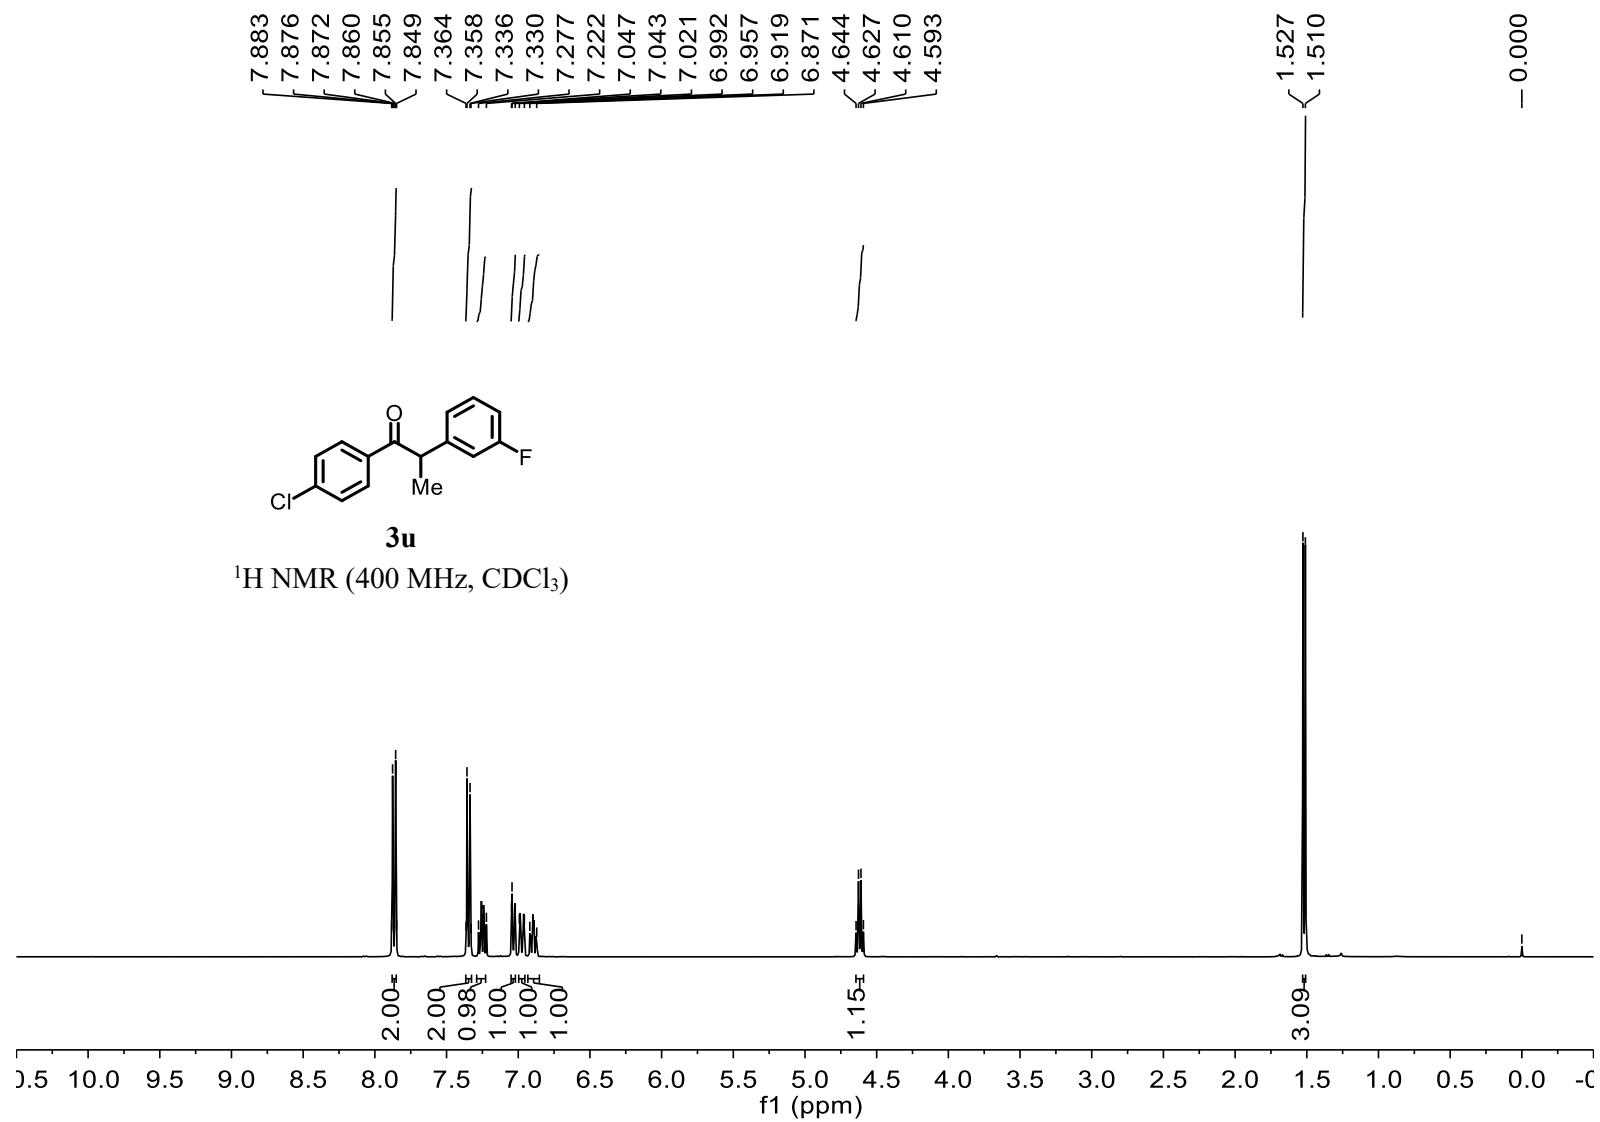

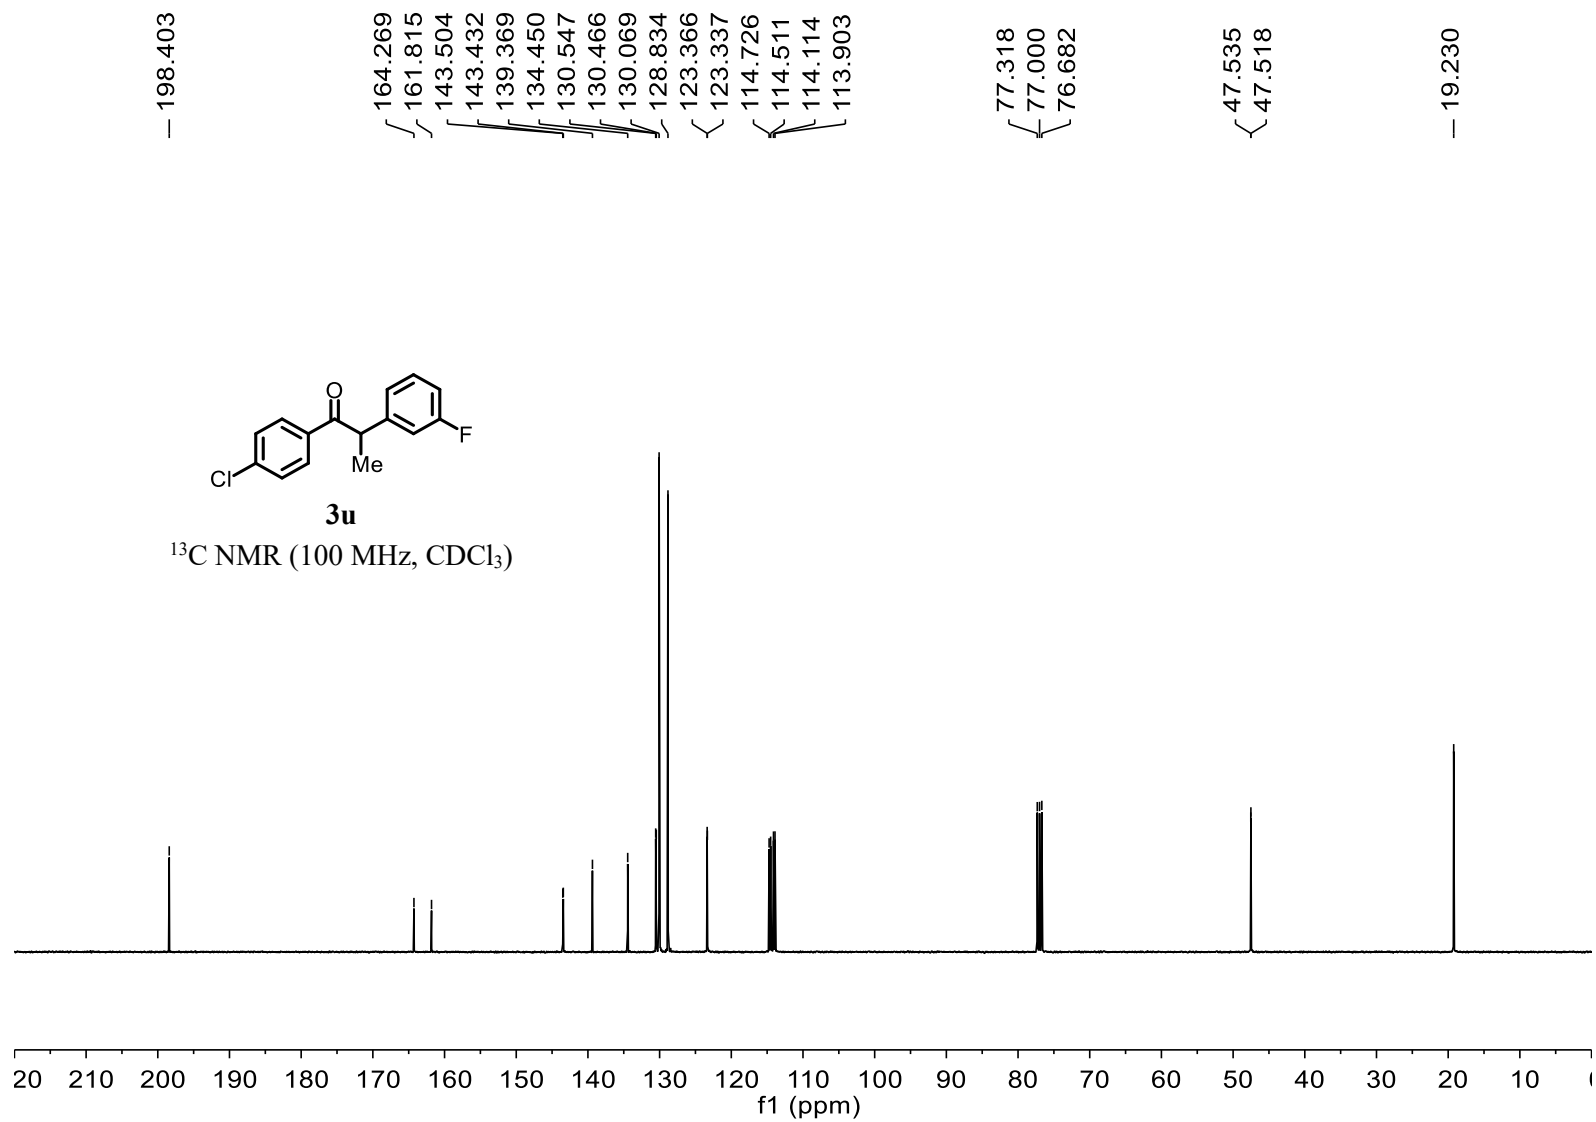

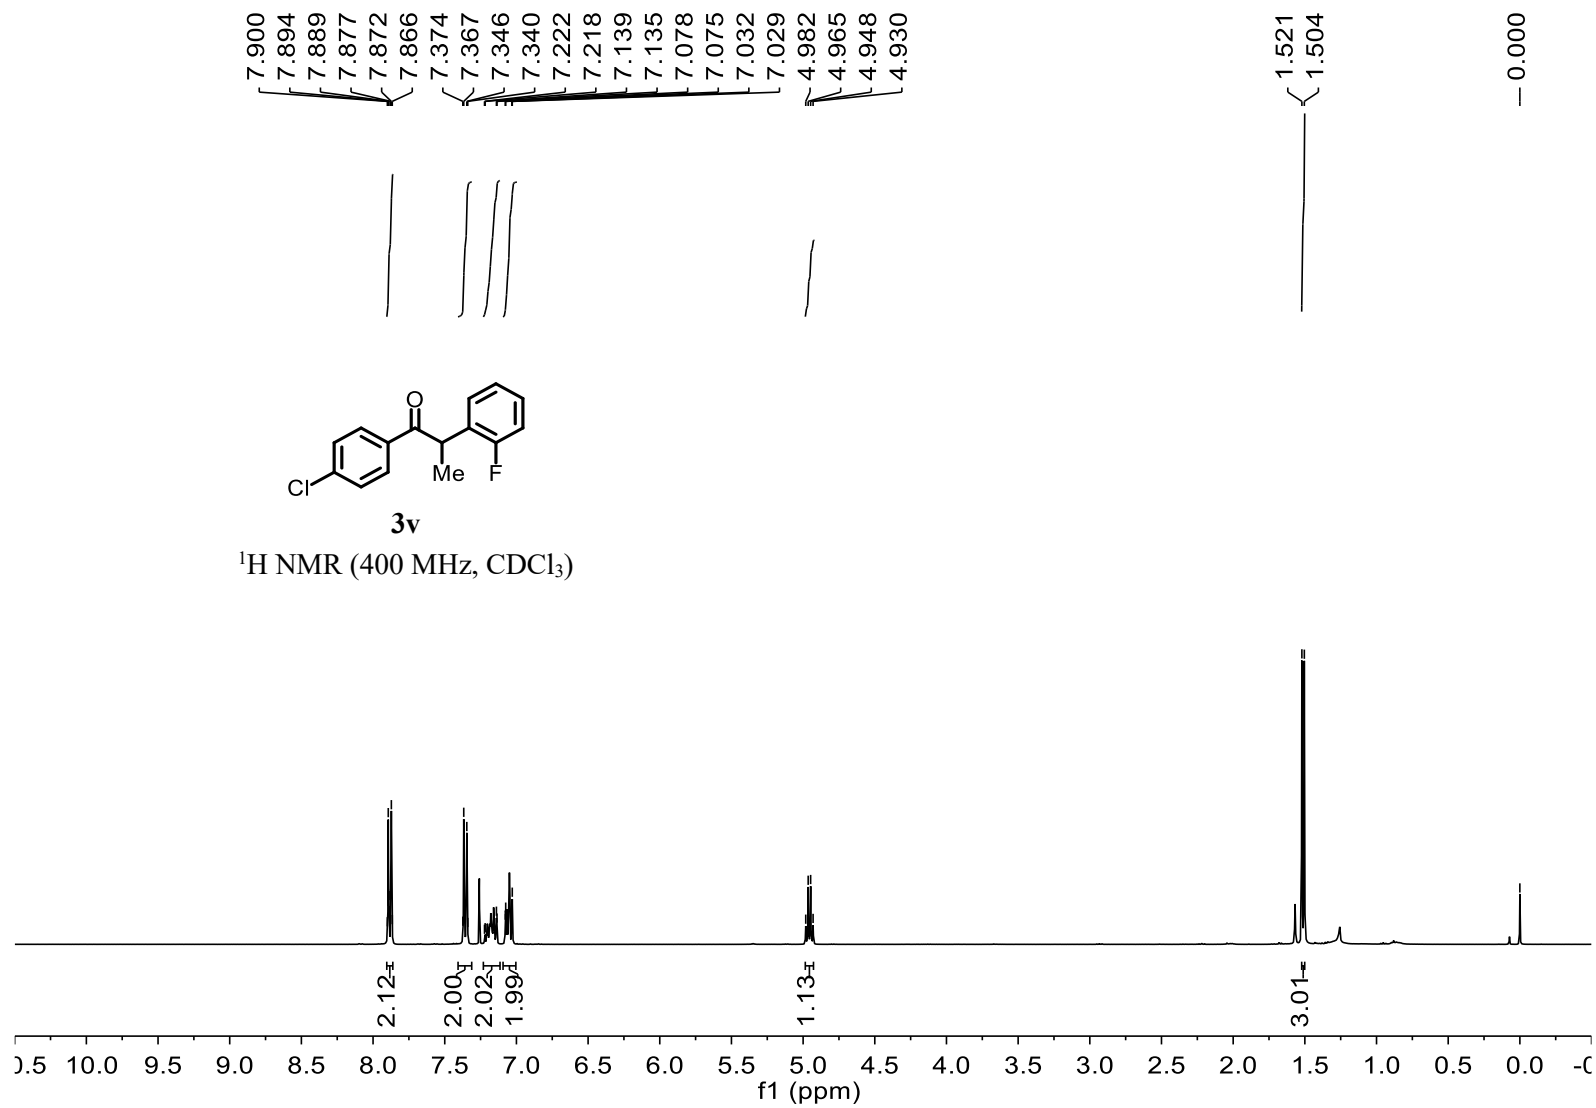

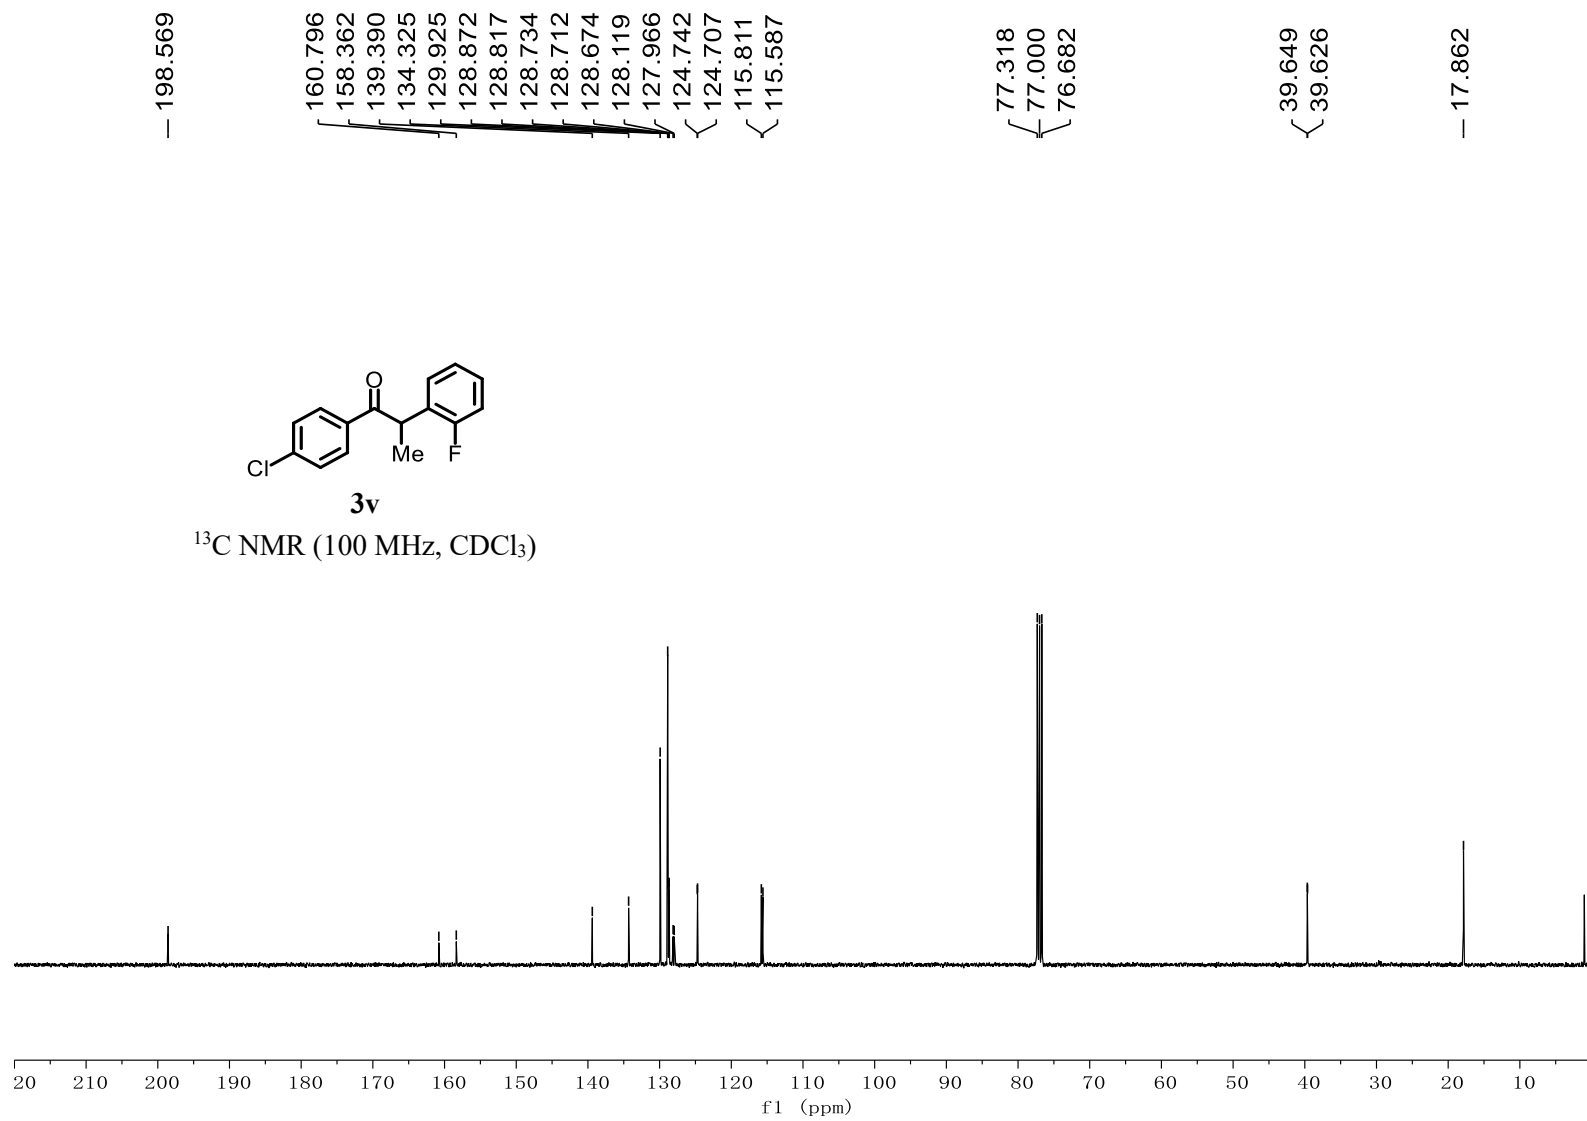

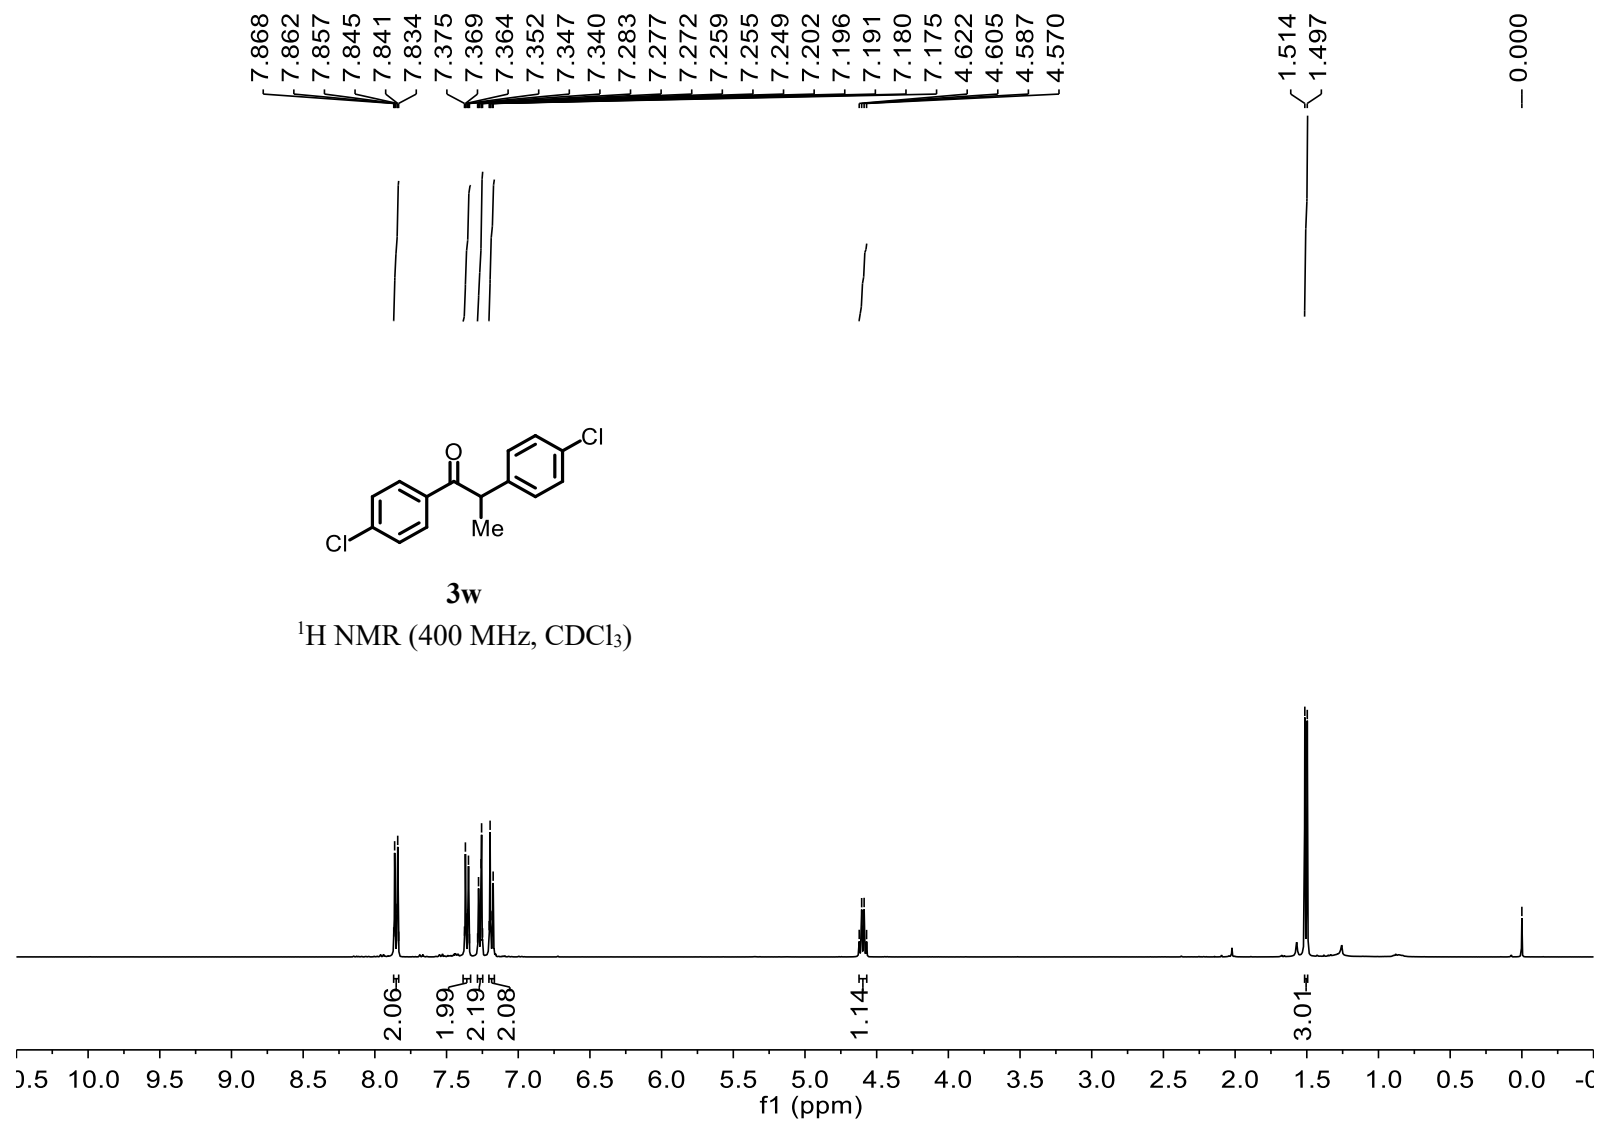



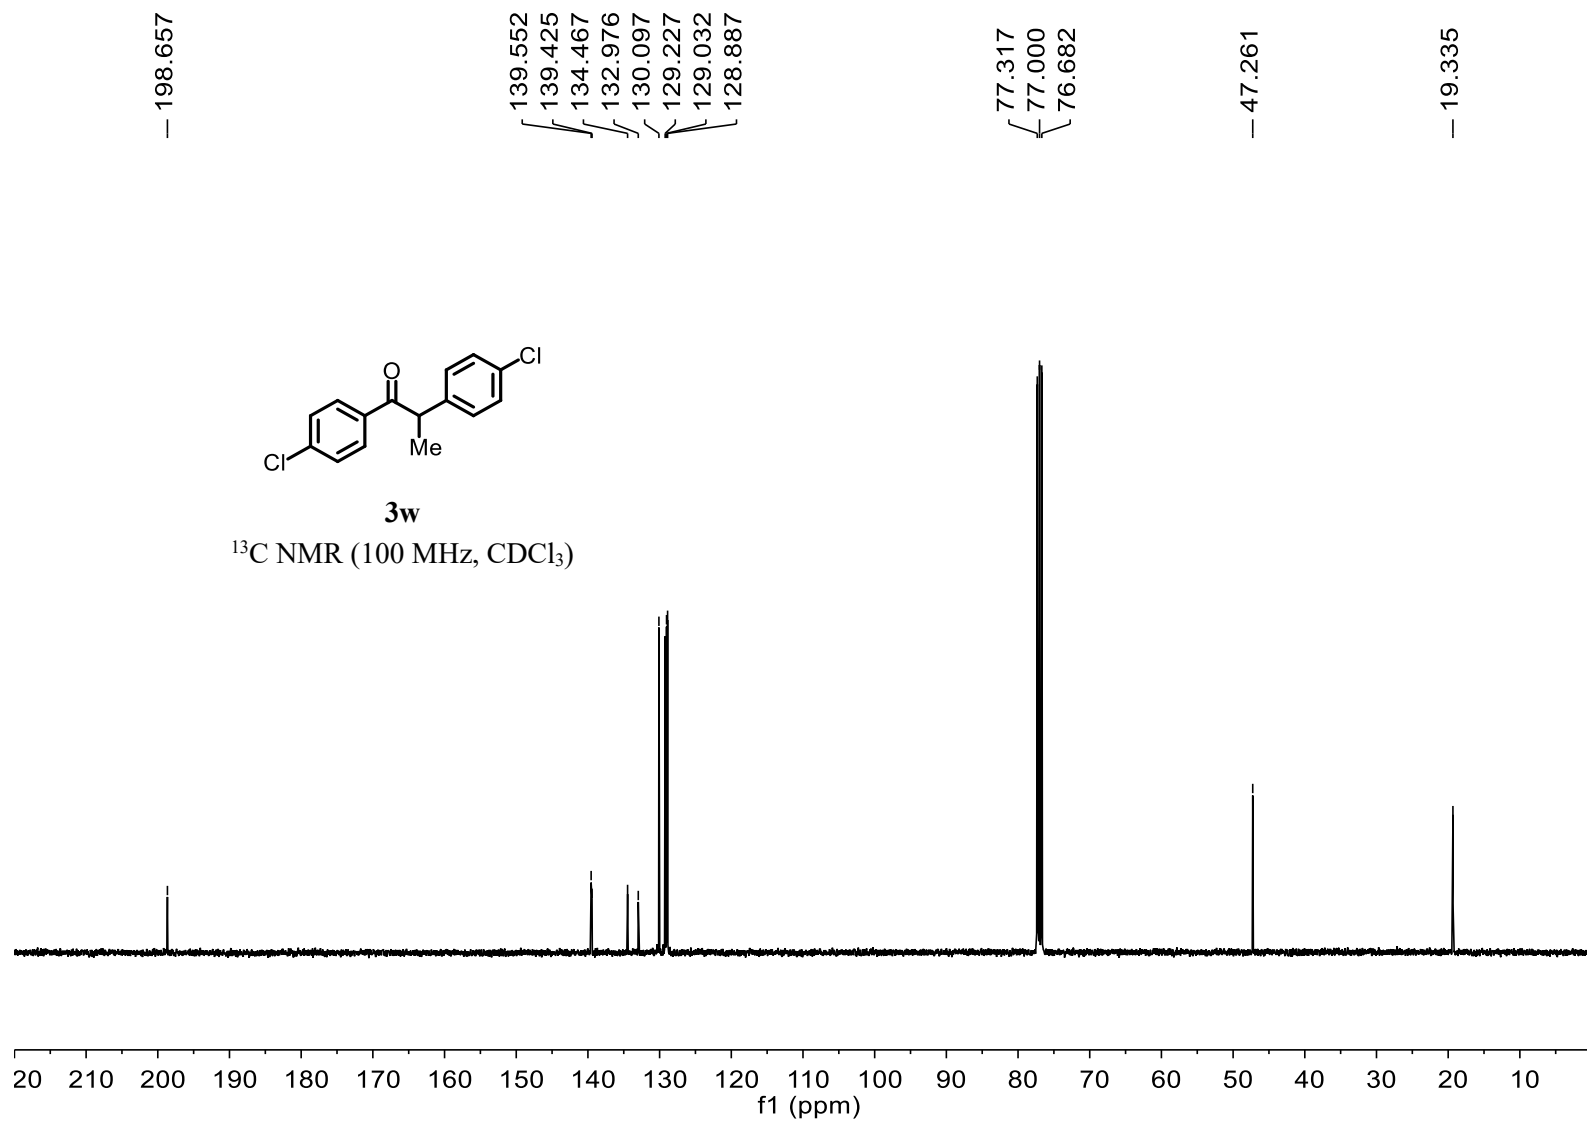

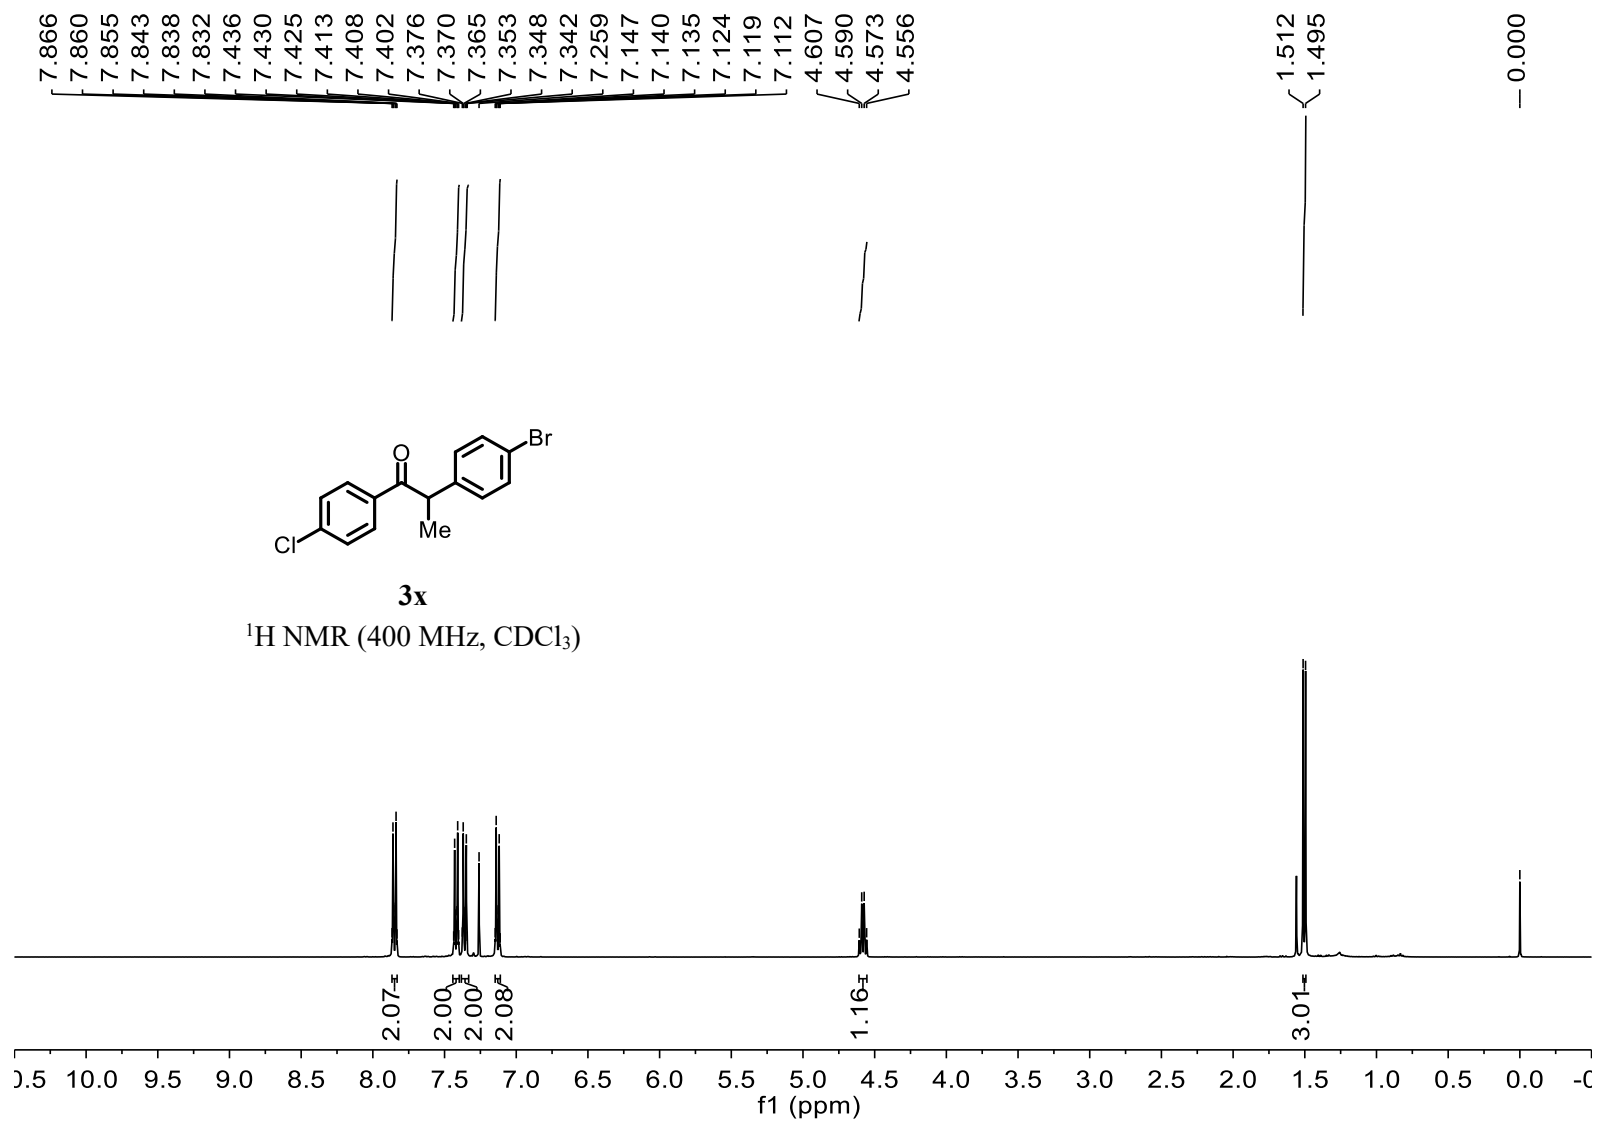

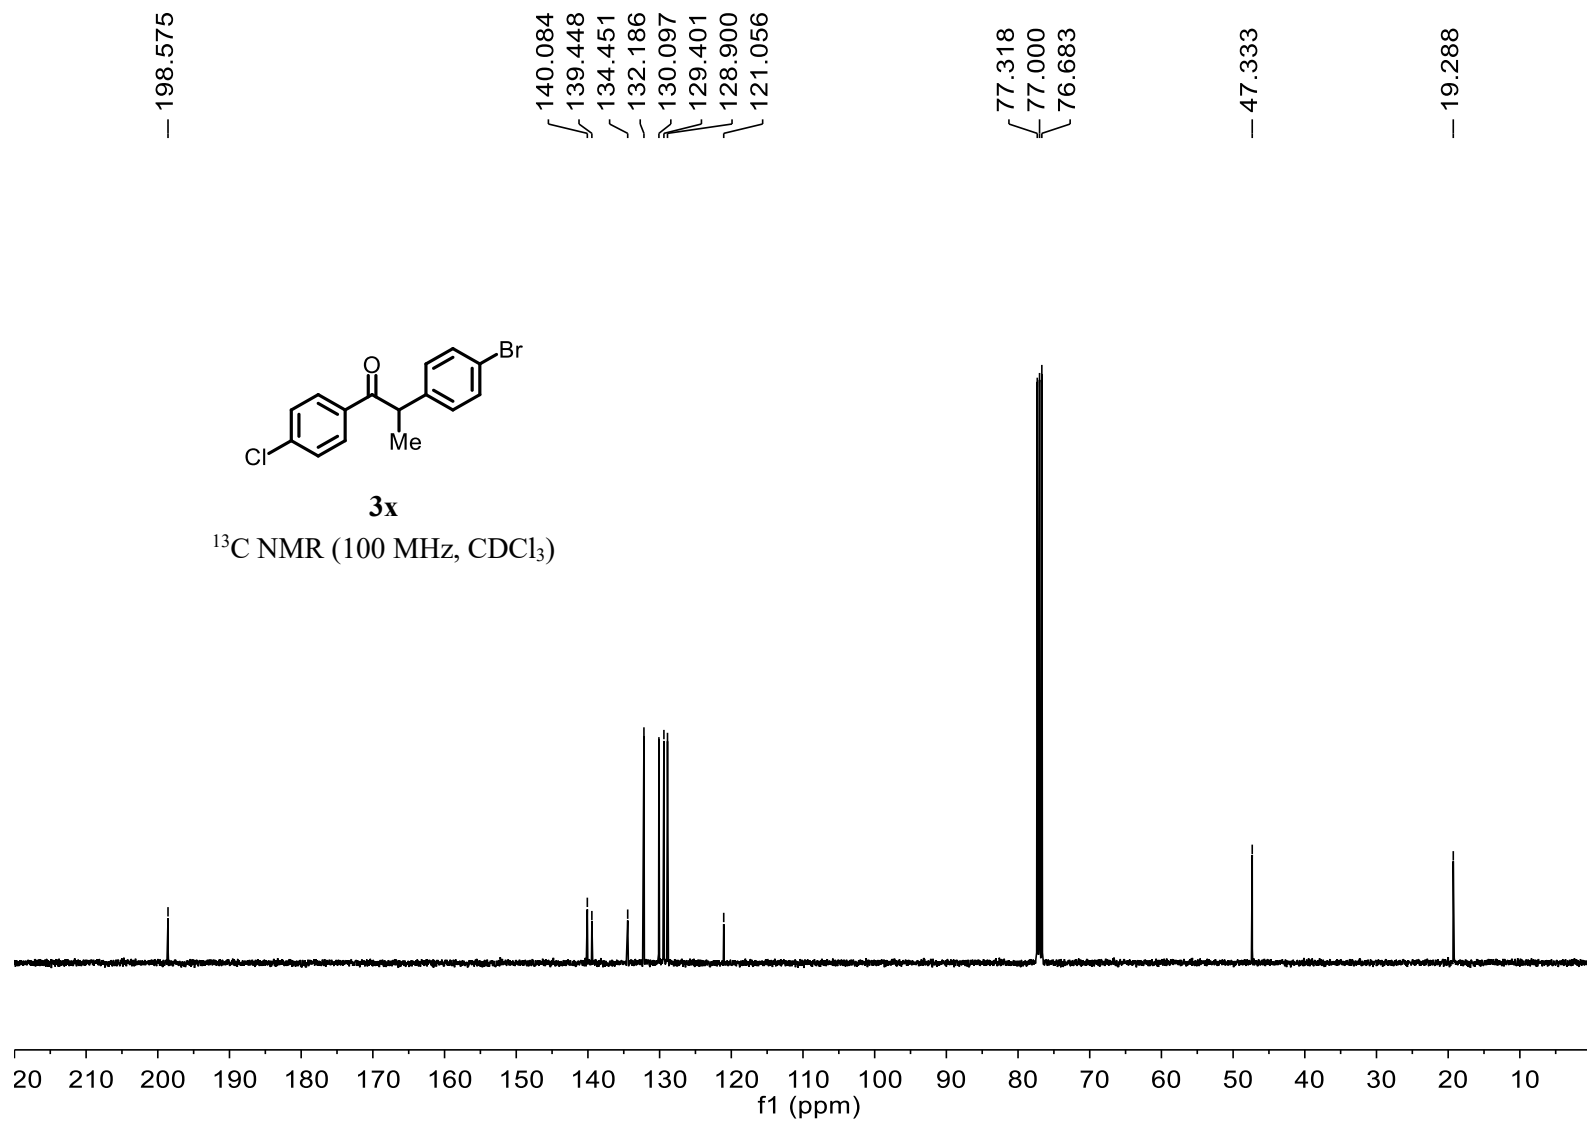

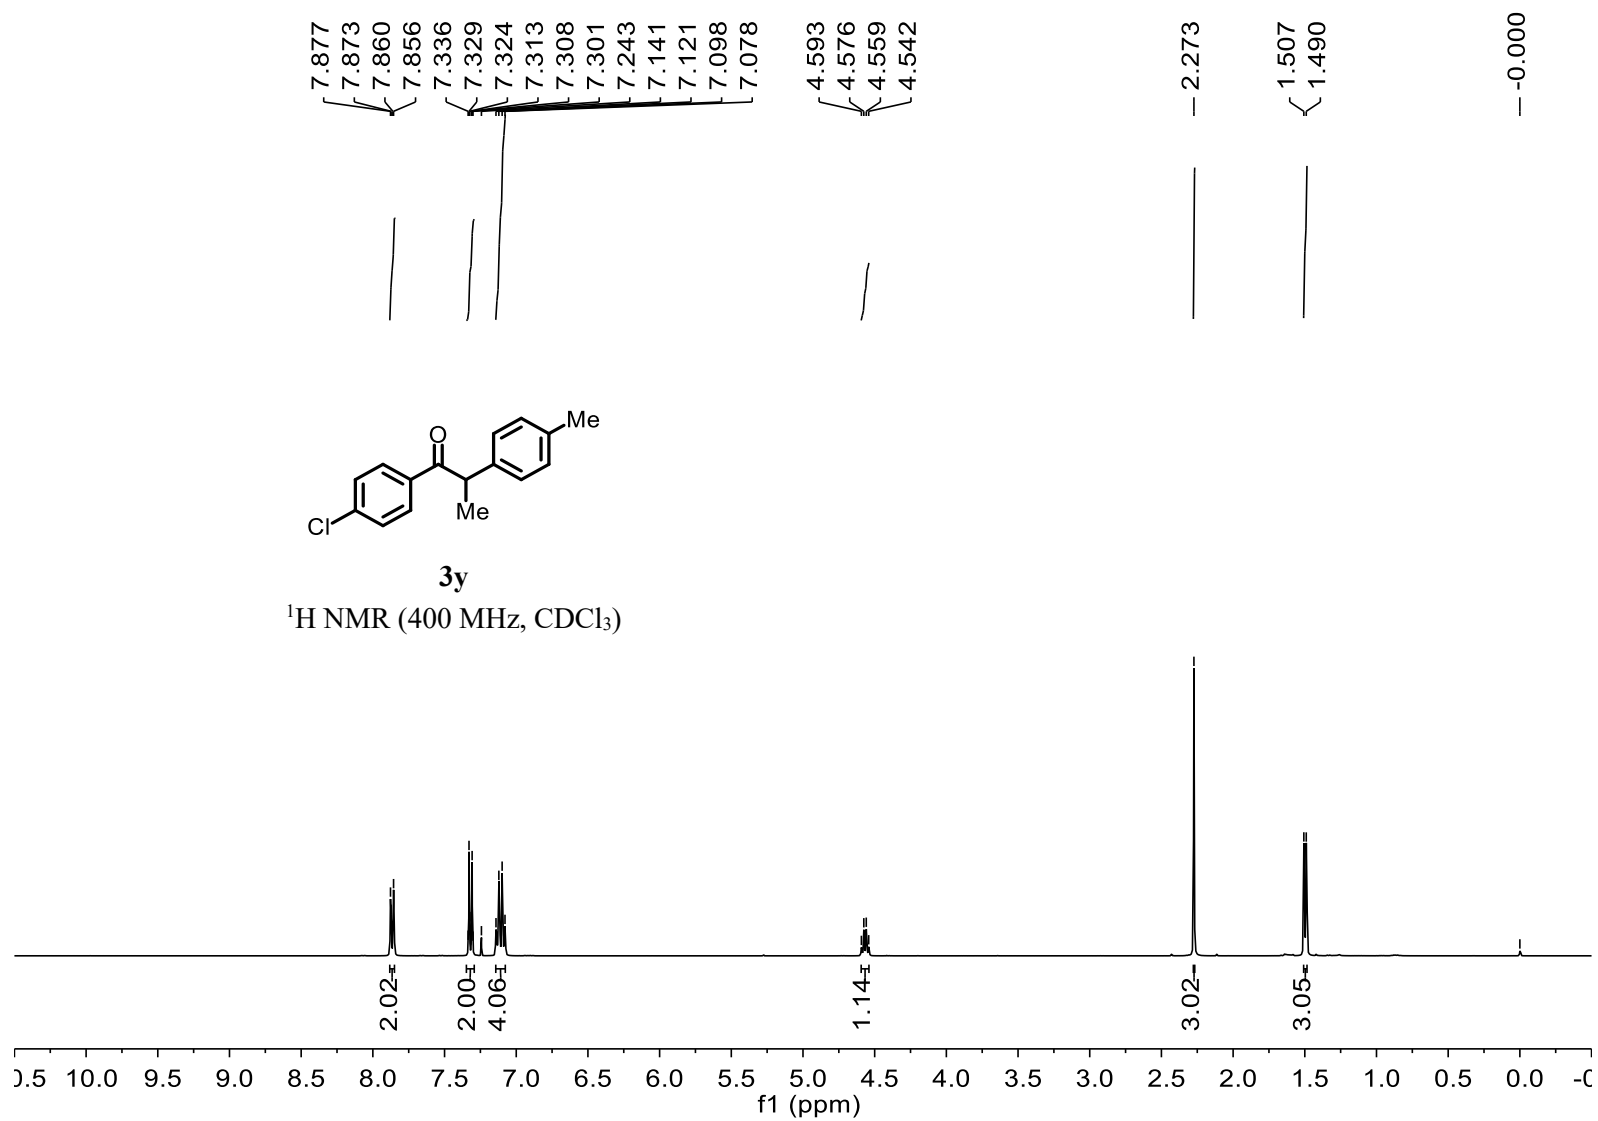

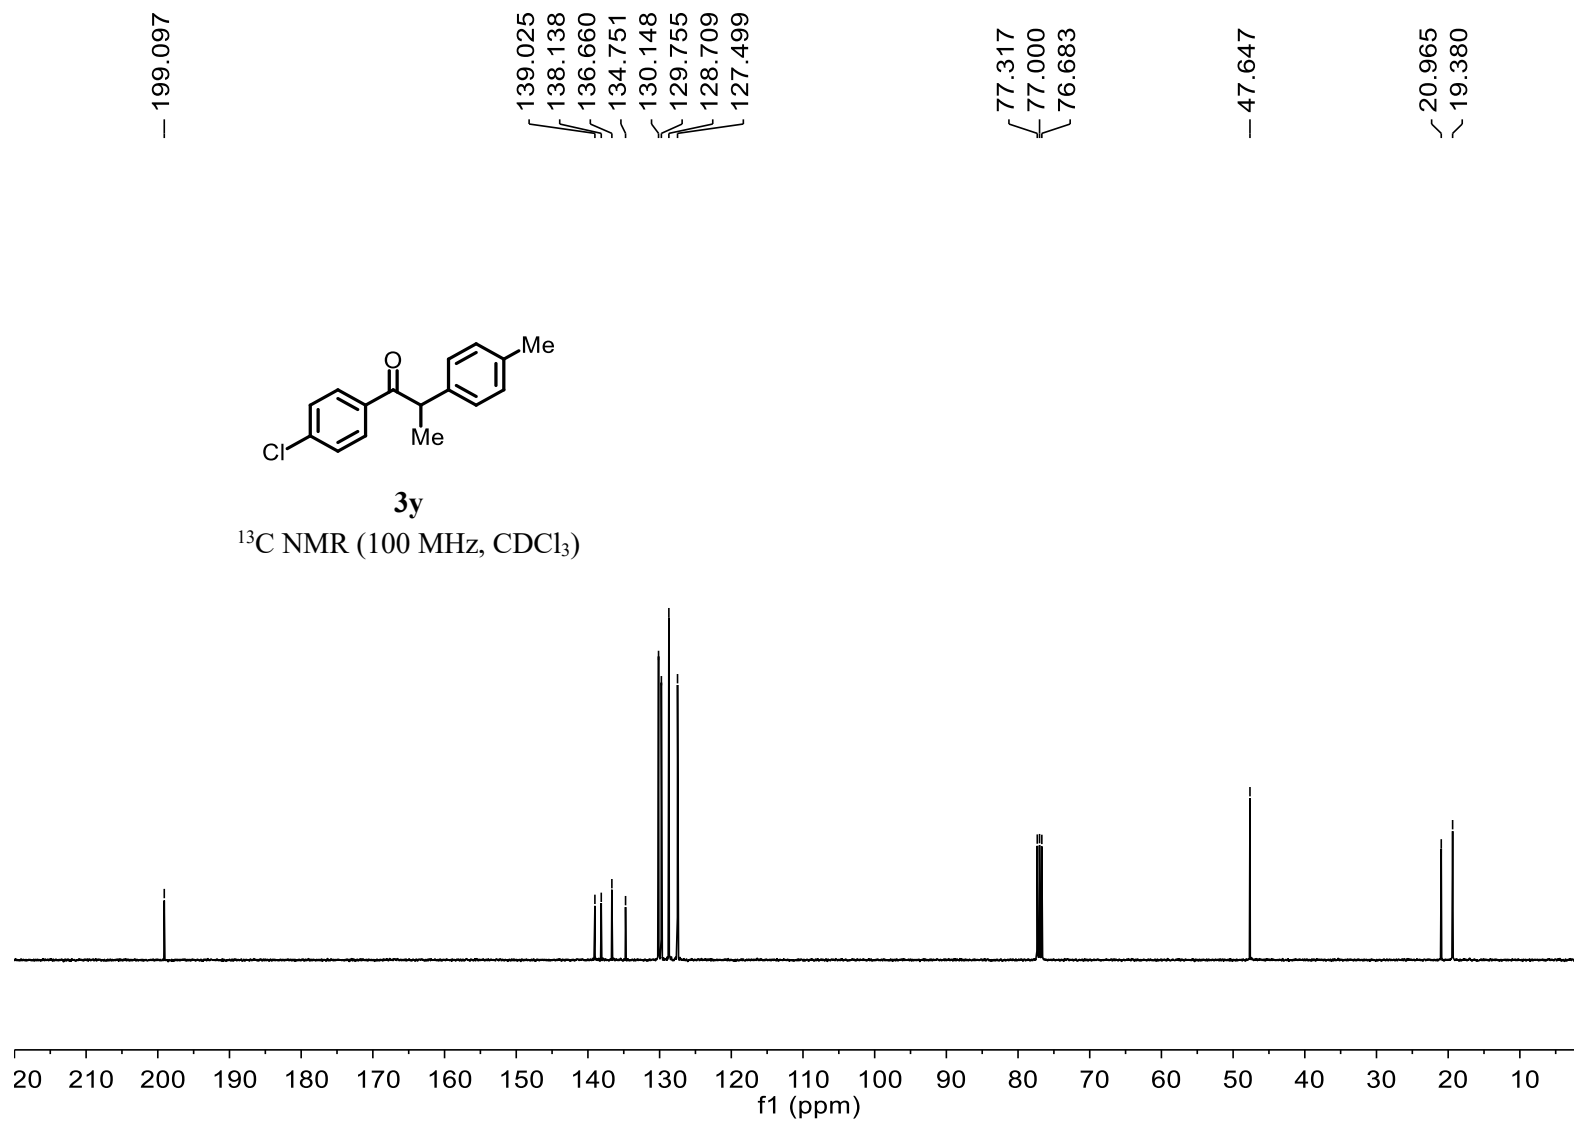

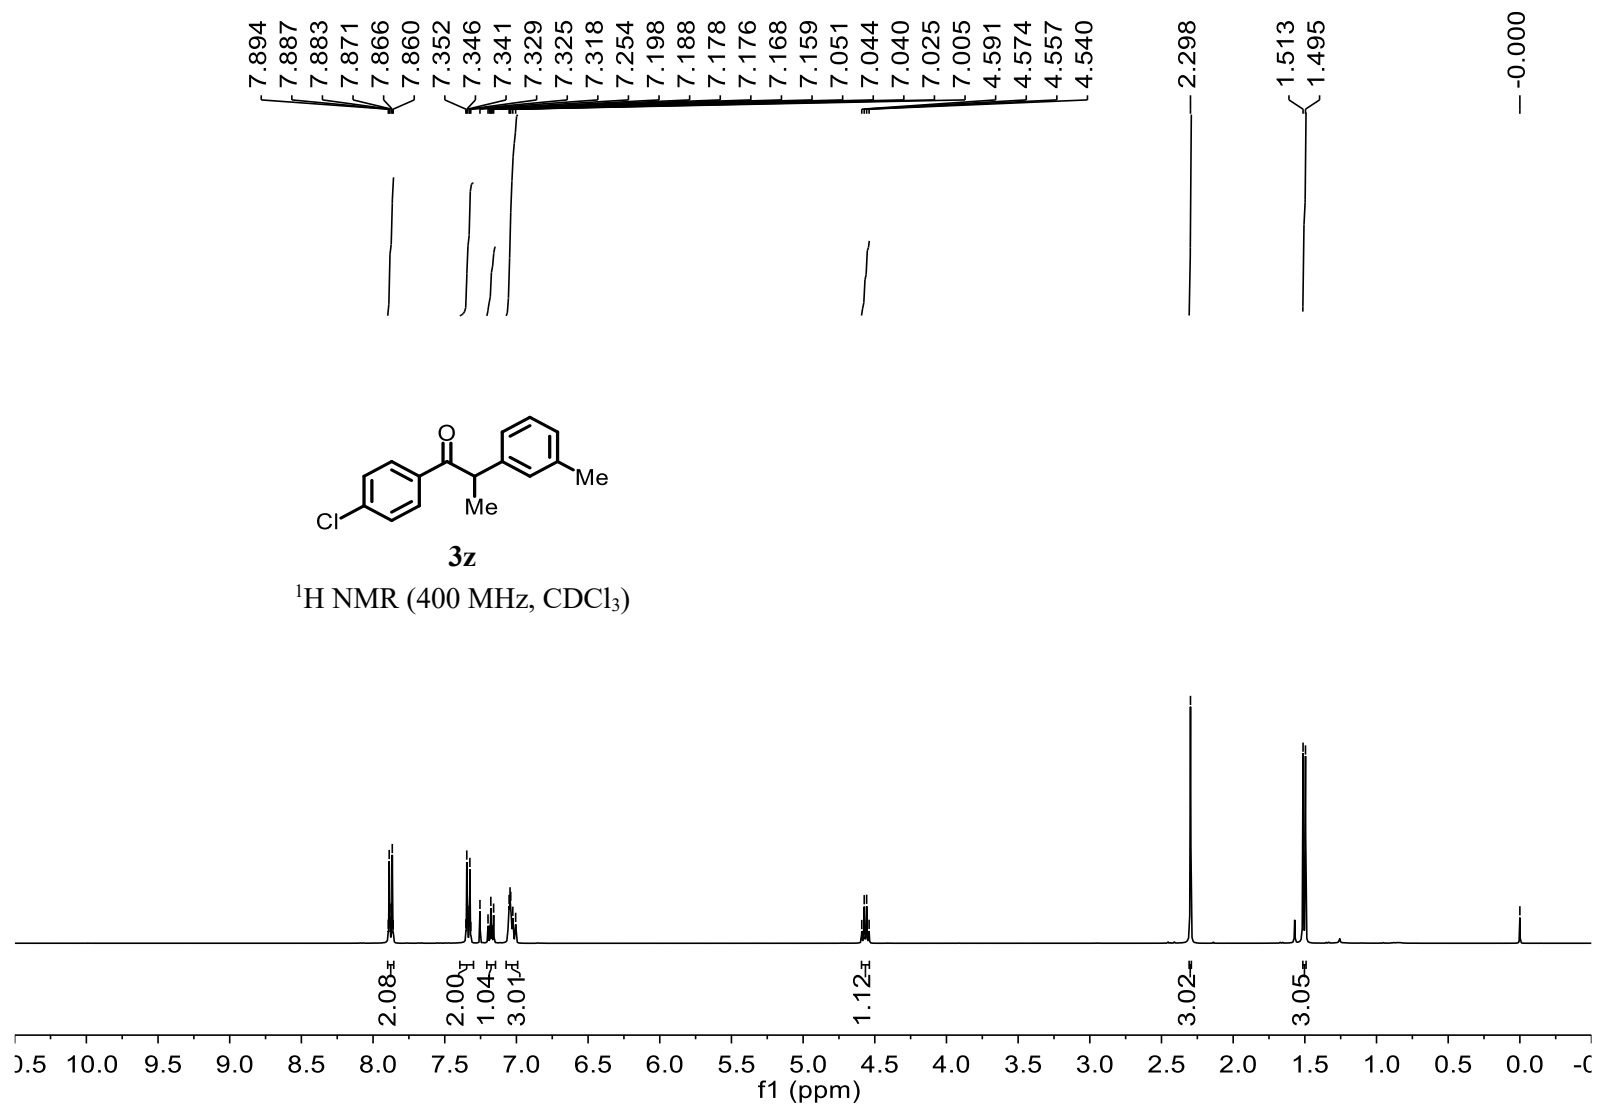

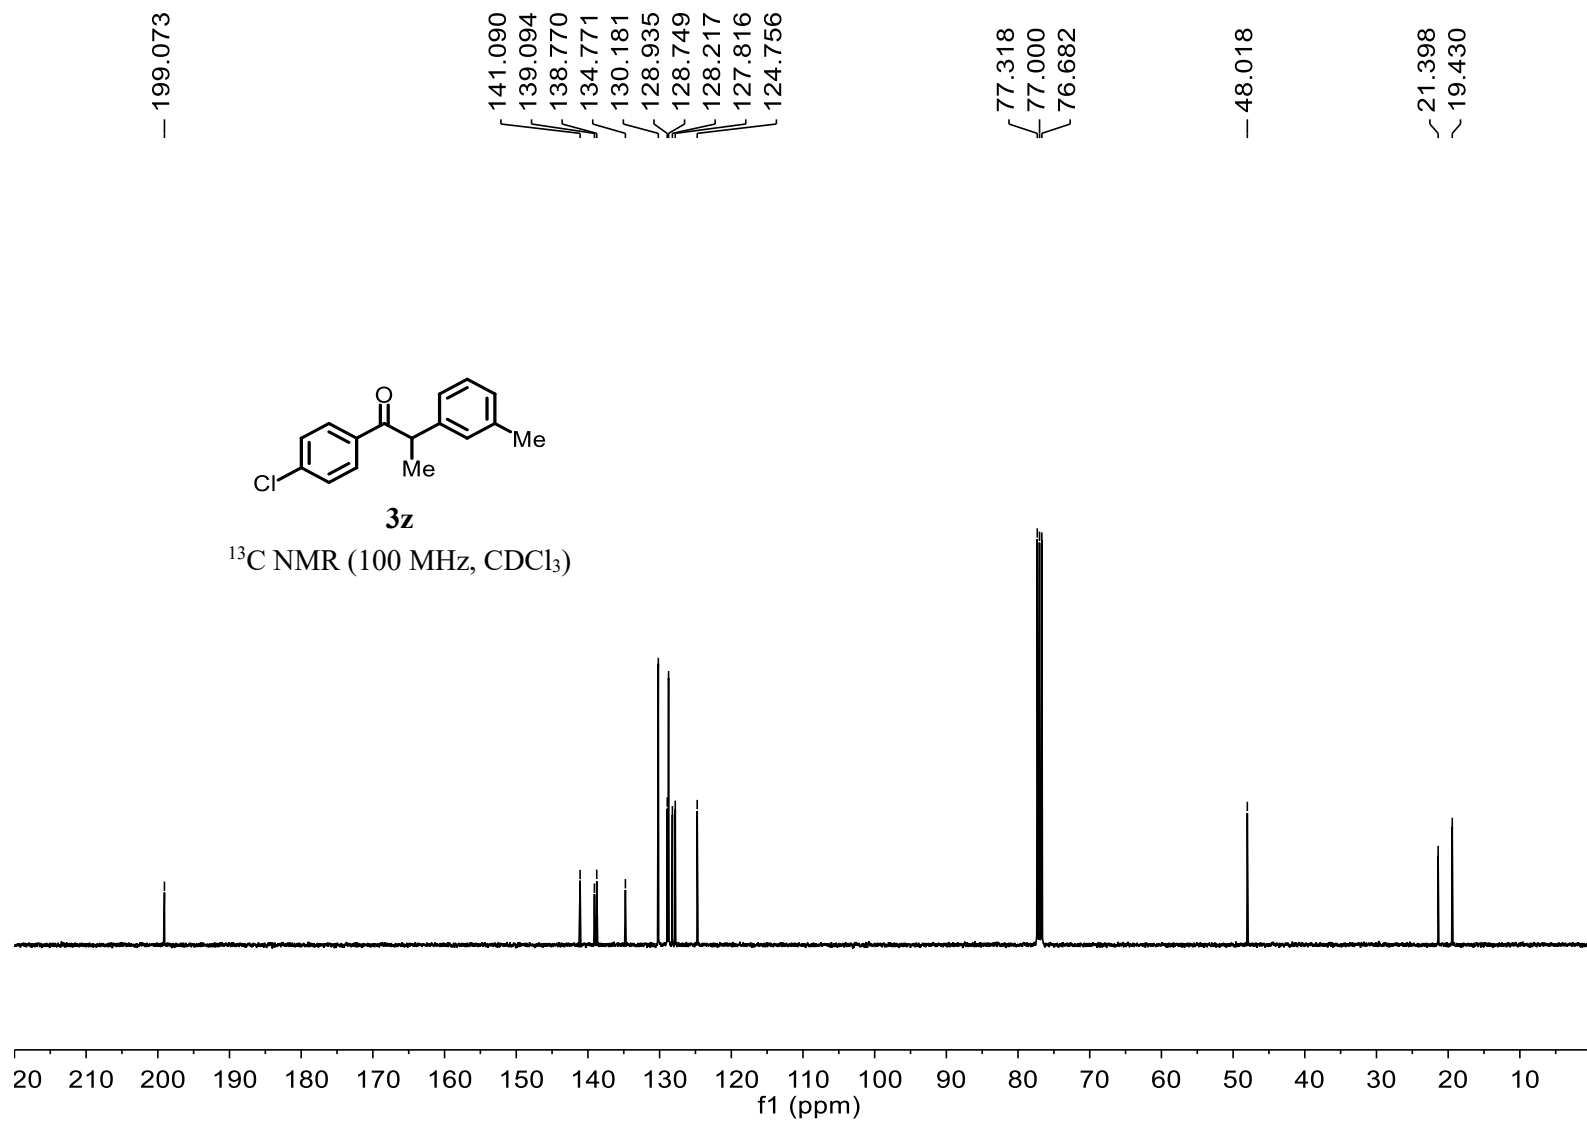

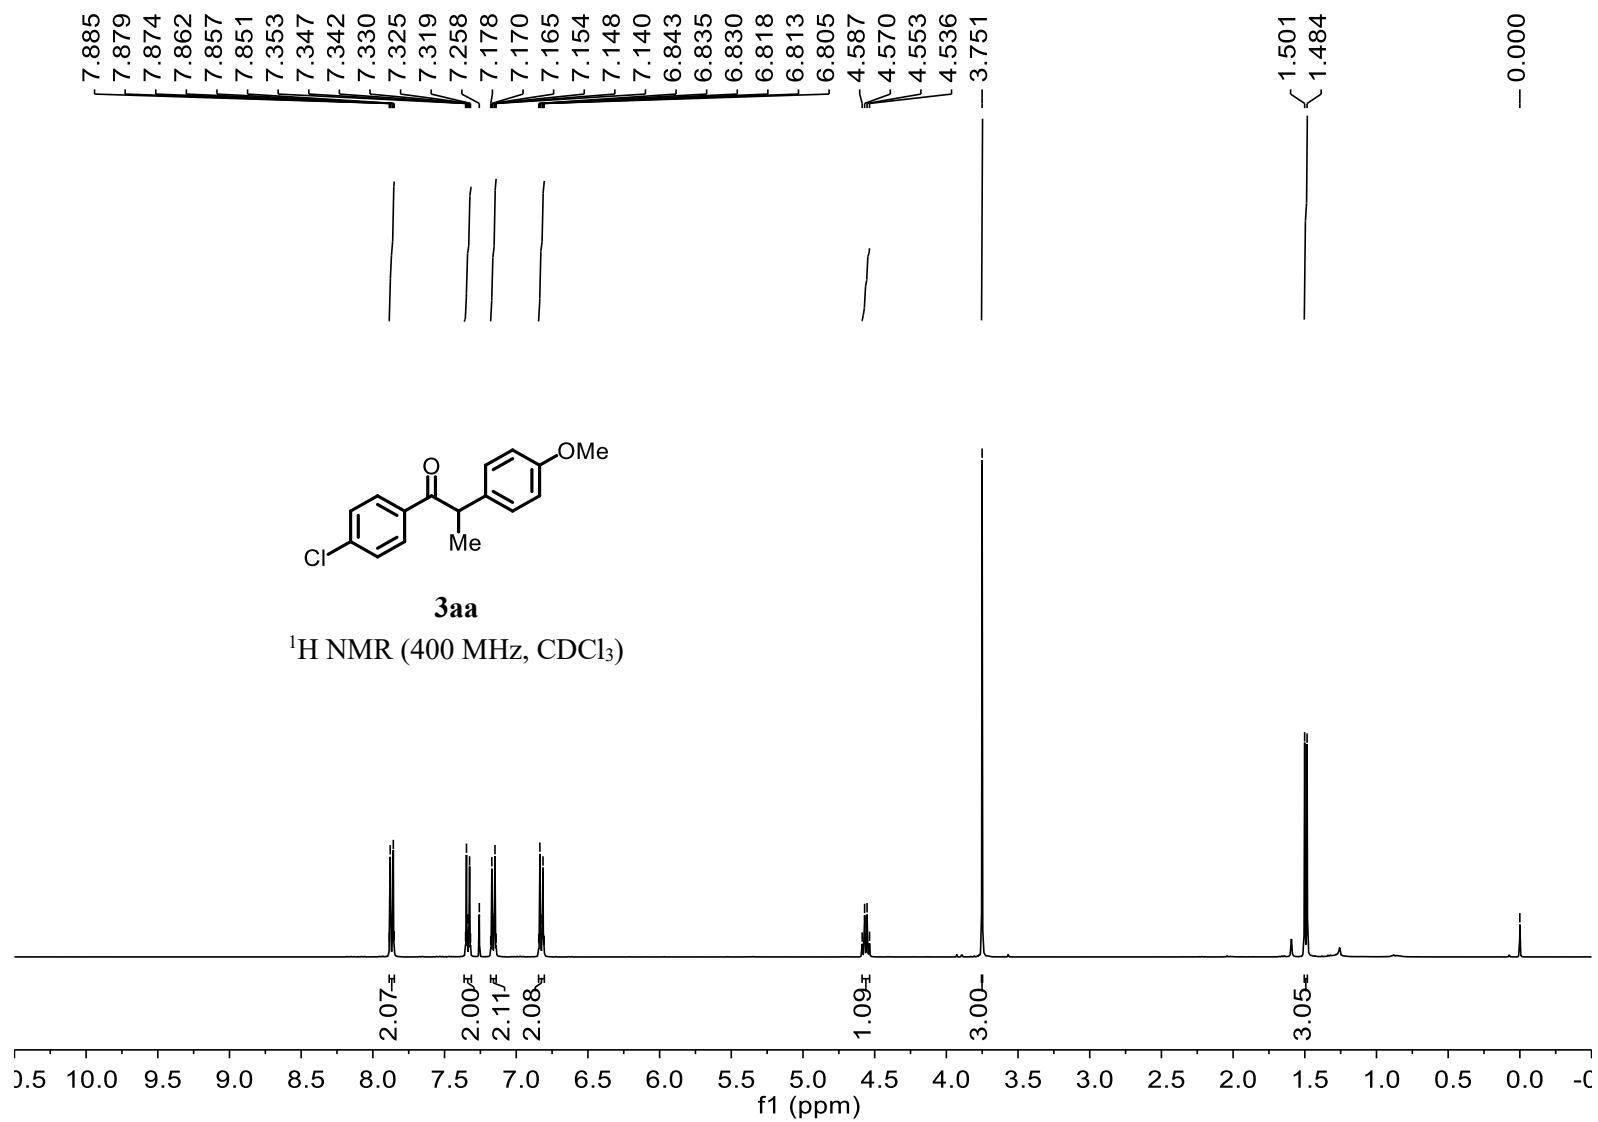



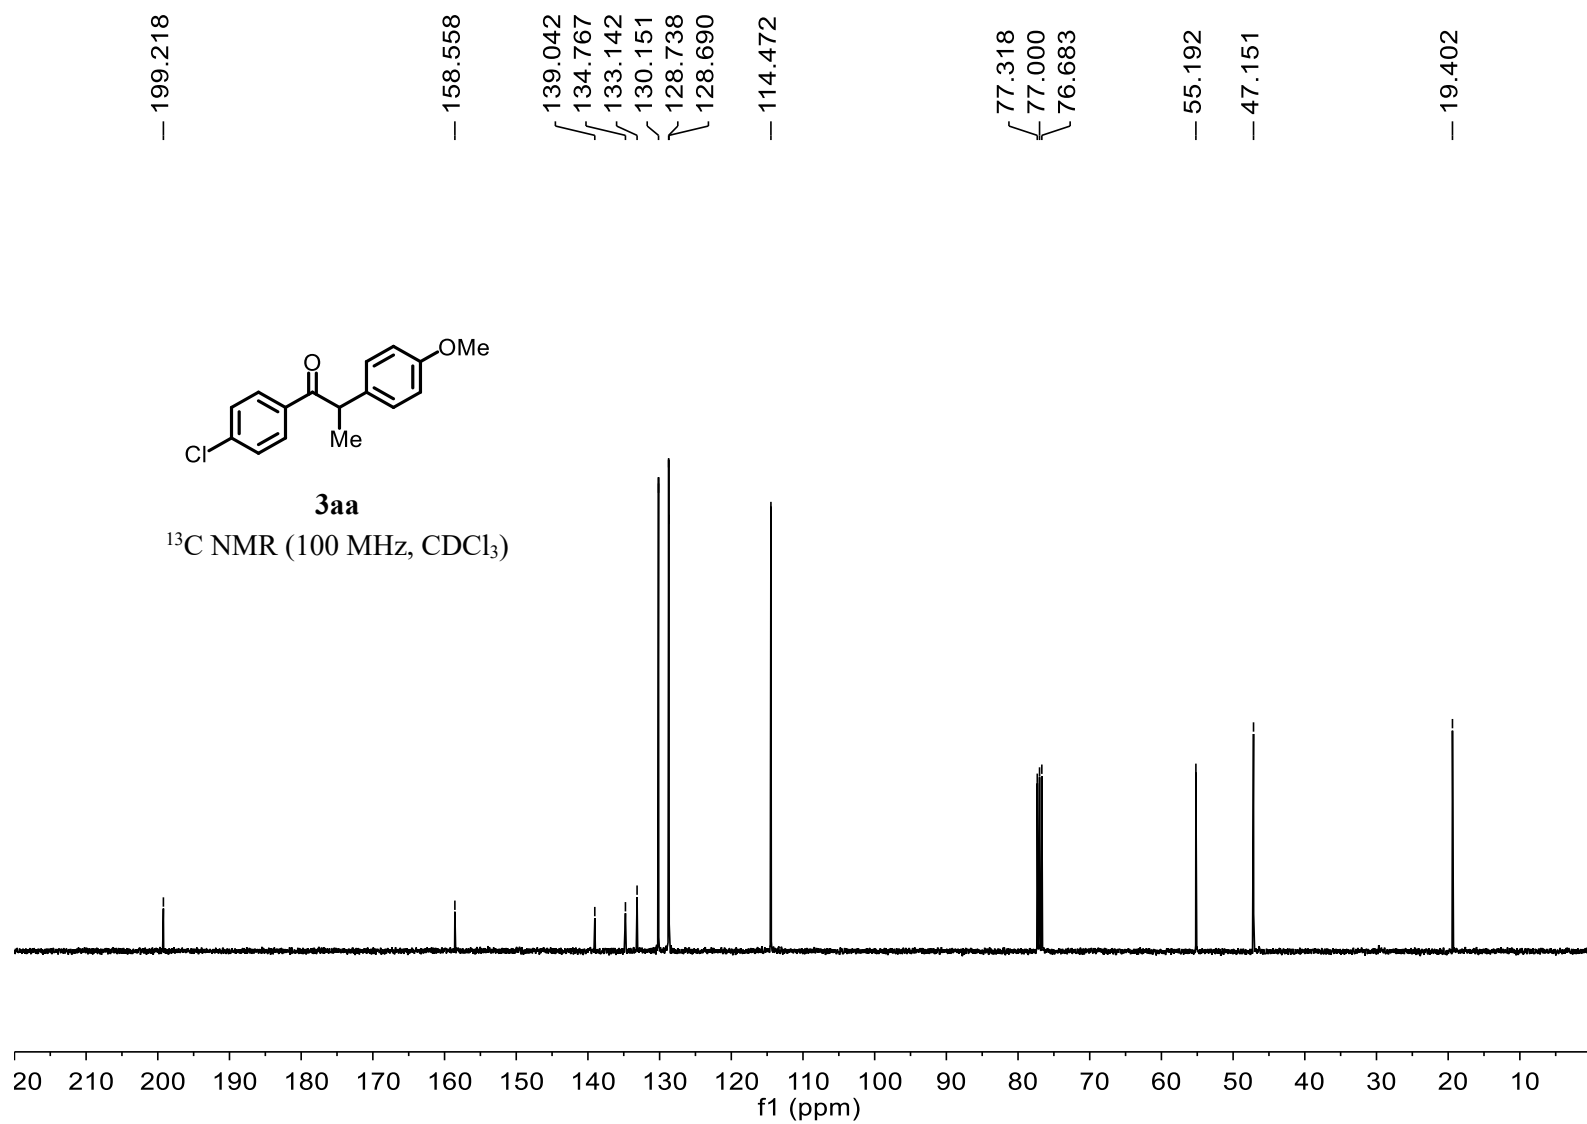

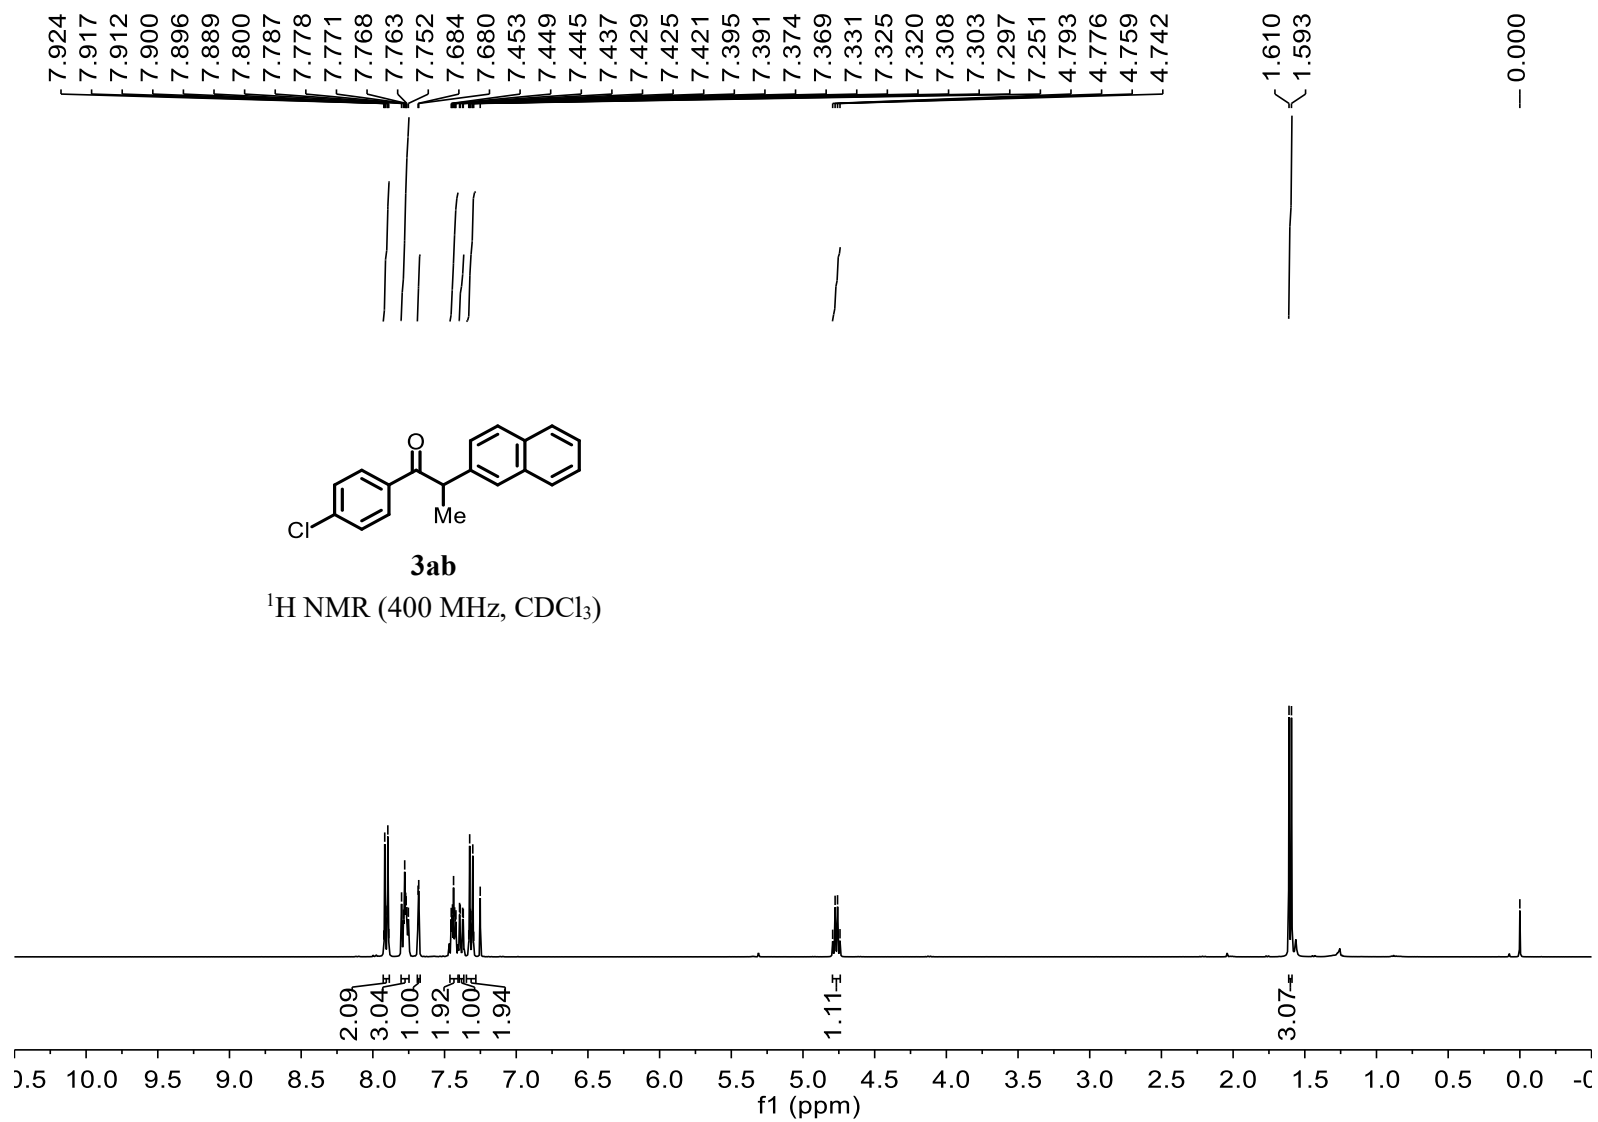

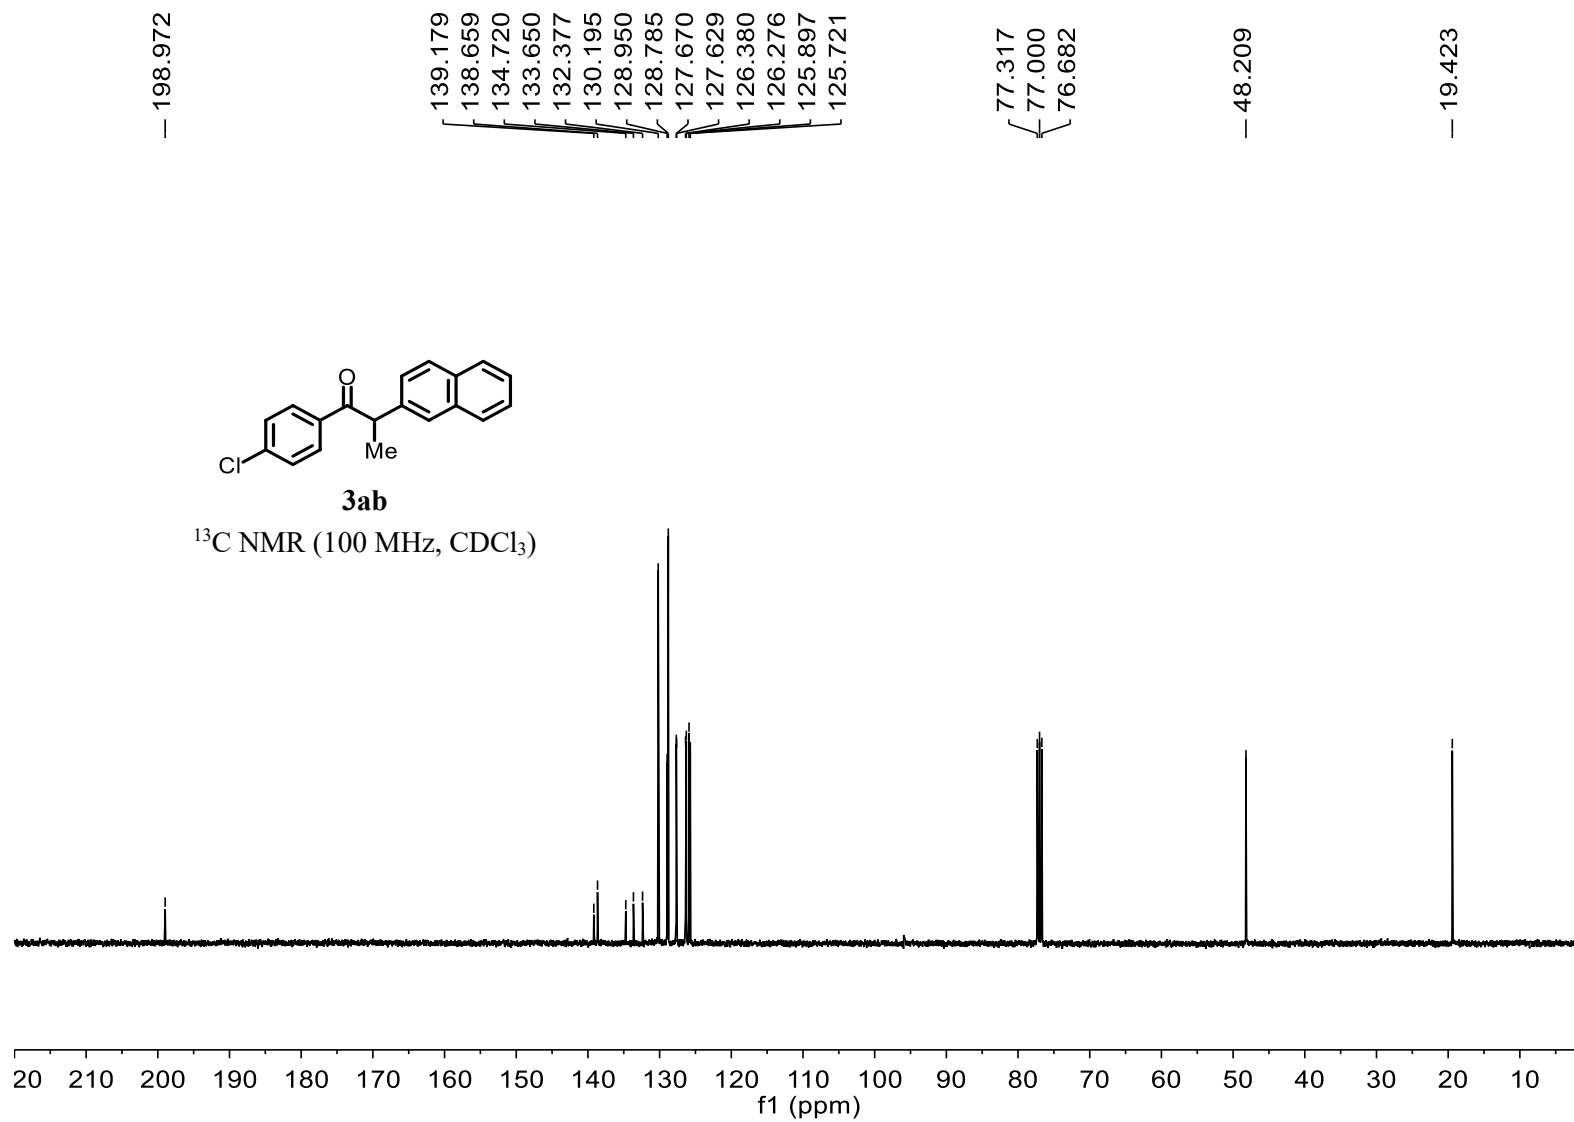

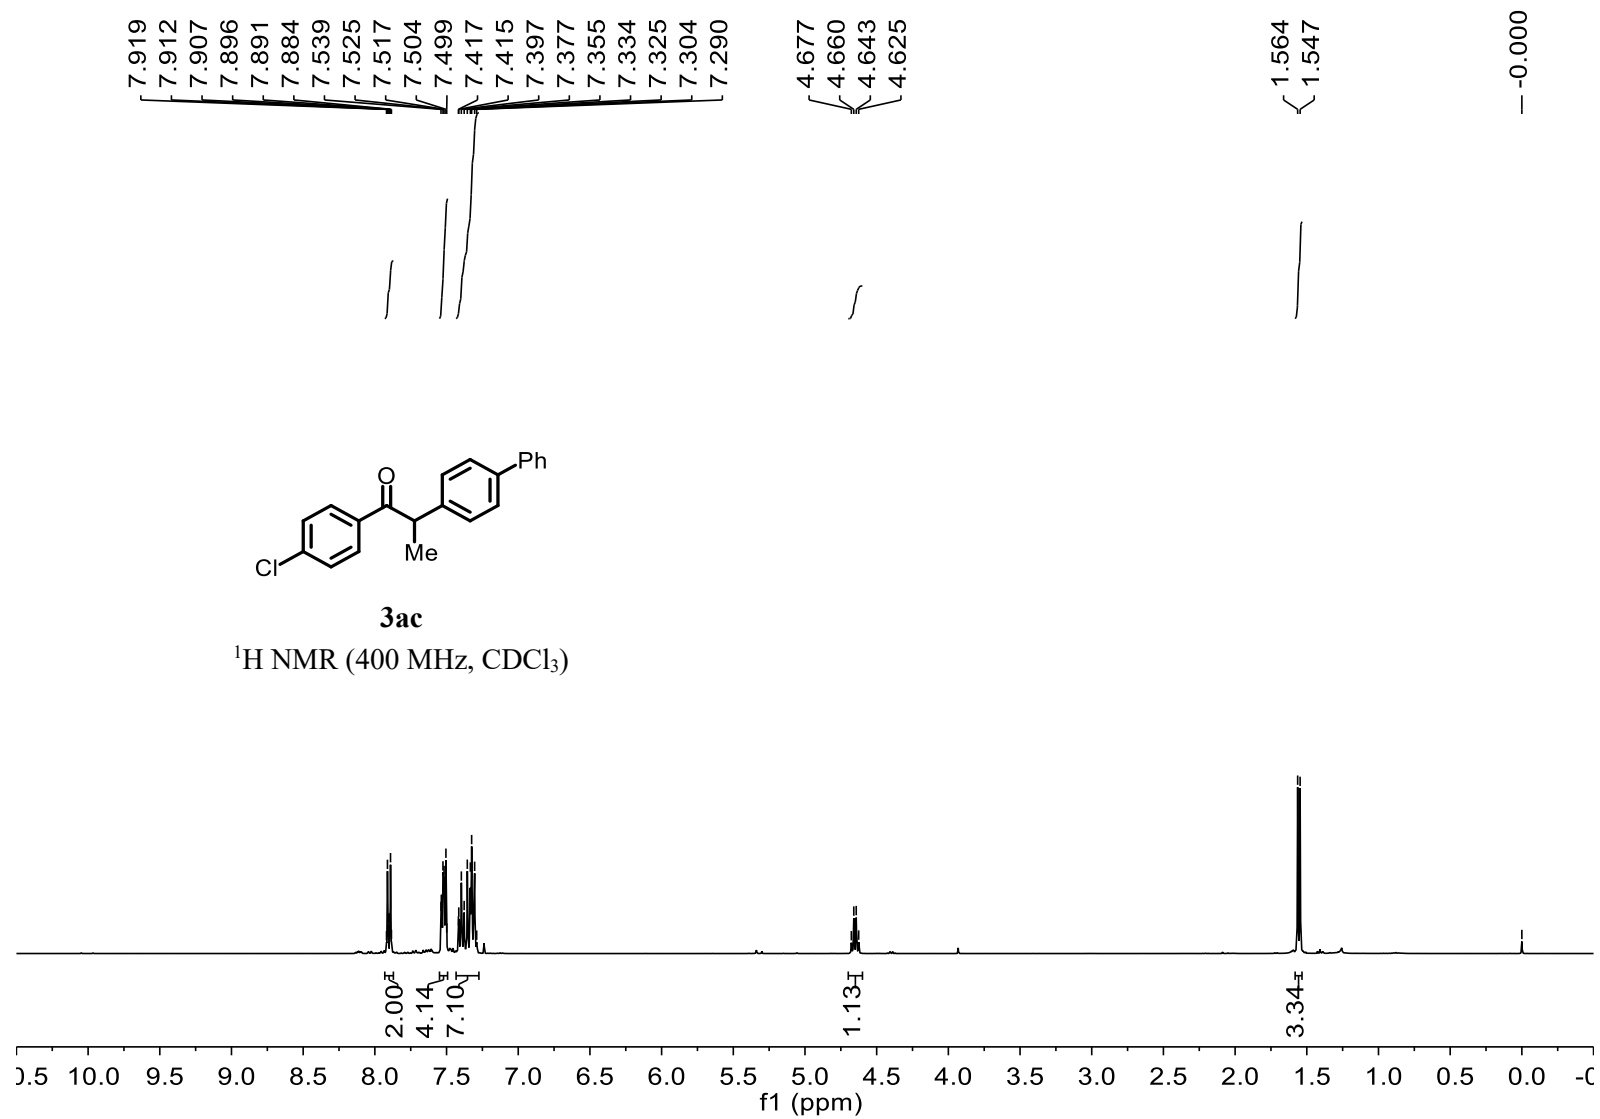

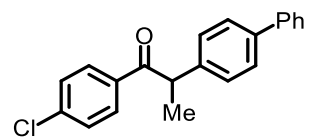

**3ac**

$^{13}\text{C}$  NMR (100 MHz,  $\text{CDCl}_3$ )

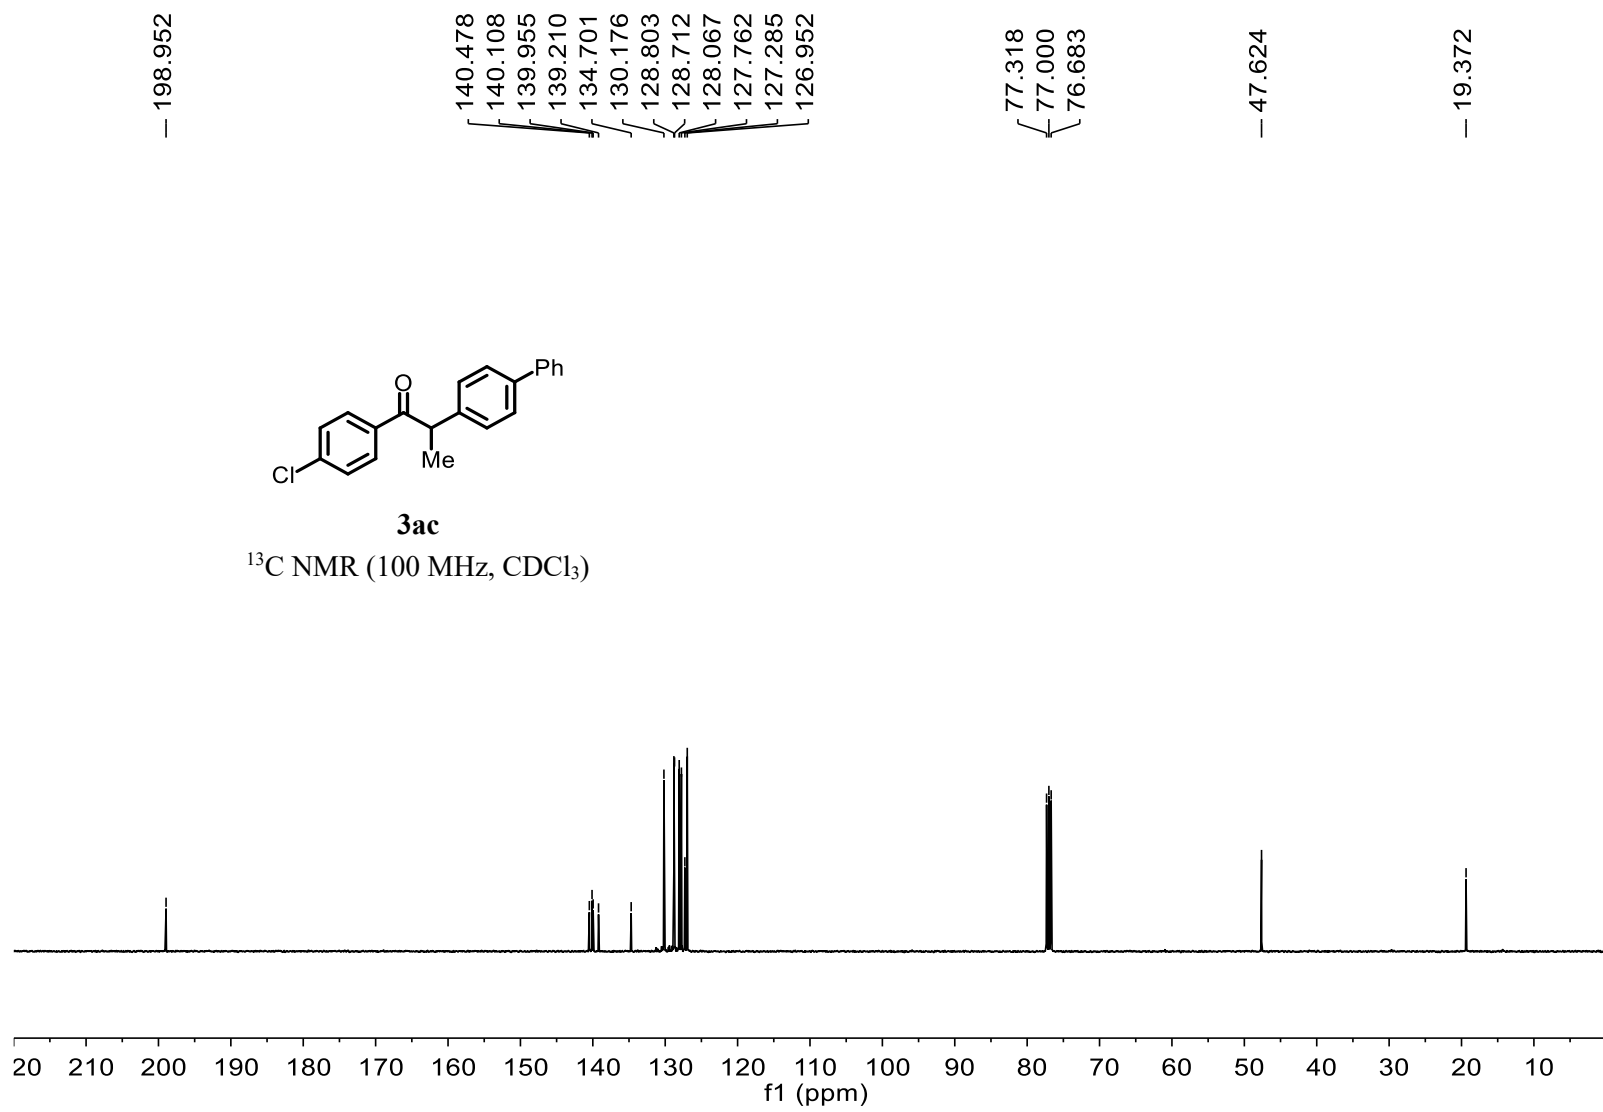

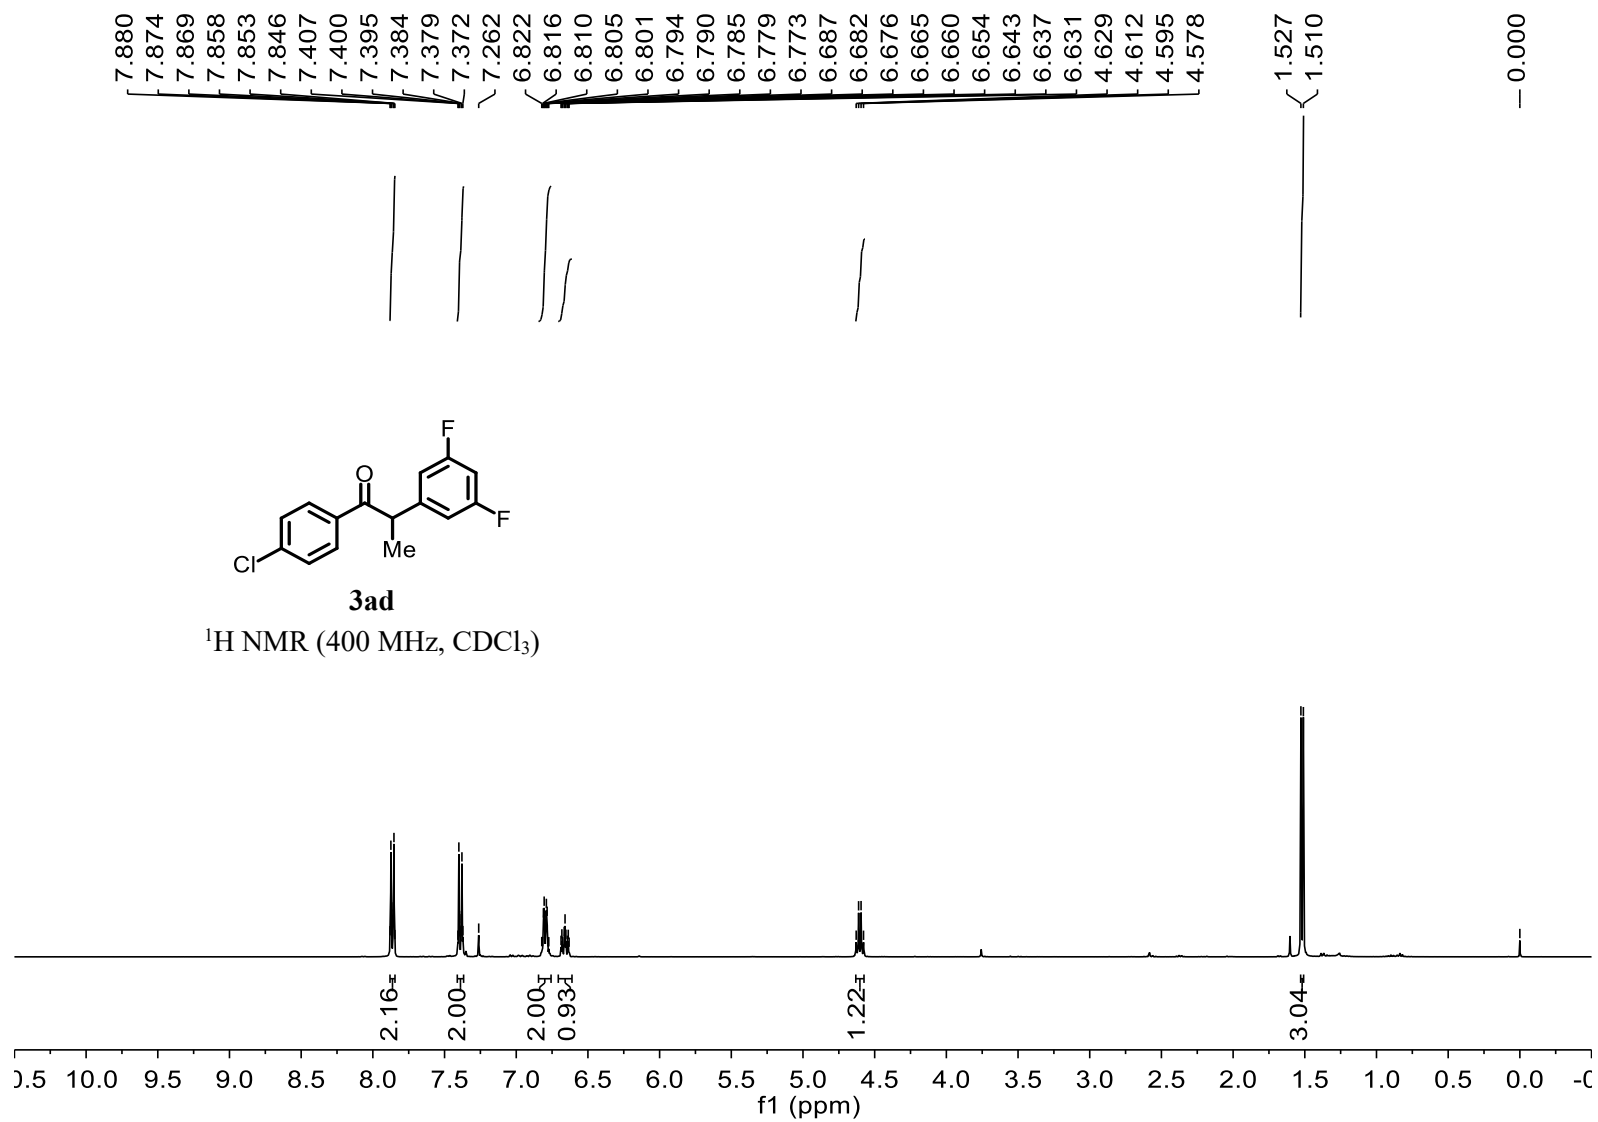

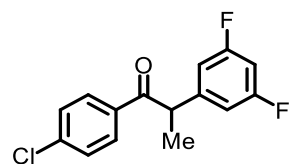

**3ad**

$^{13}\text{C}$  NMR (100 MHz,  $\text{CDCl}_3$ )

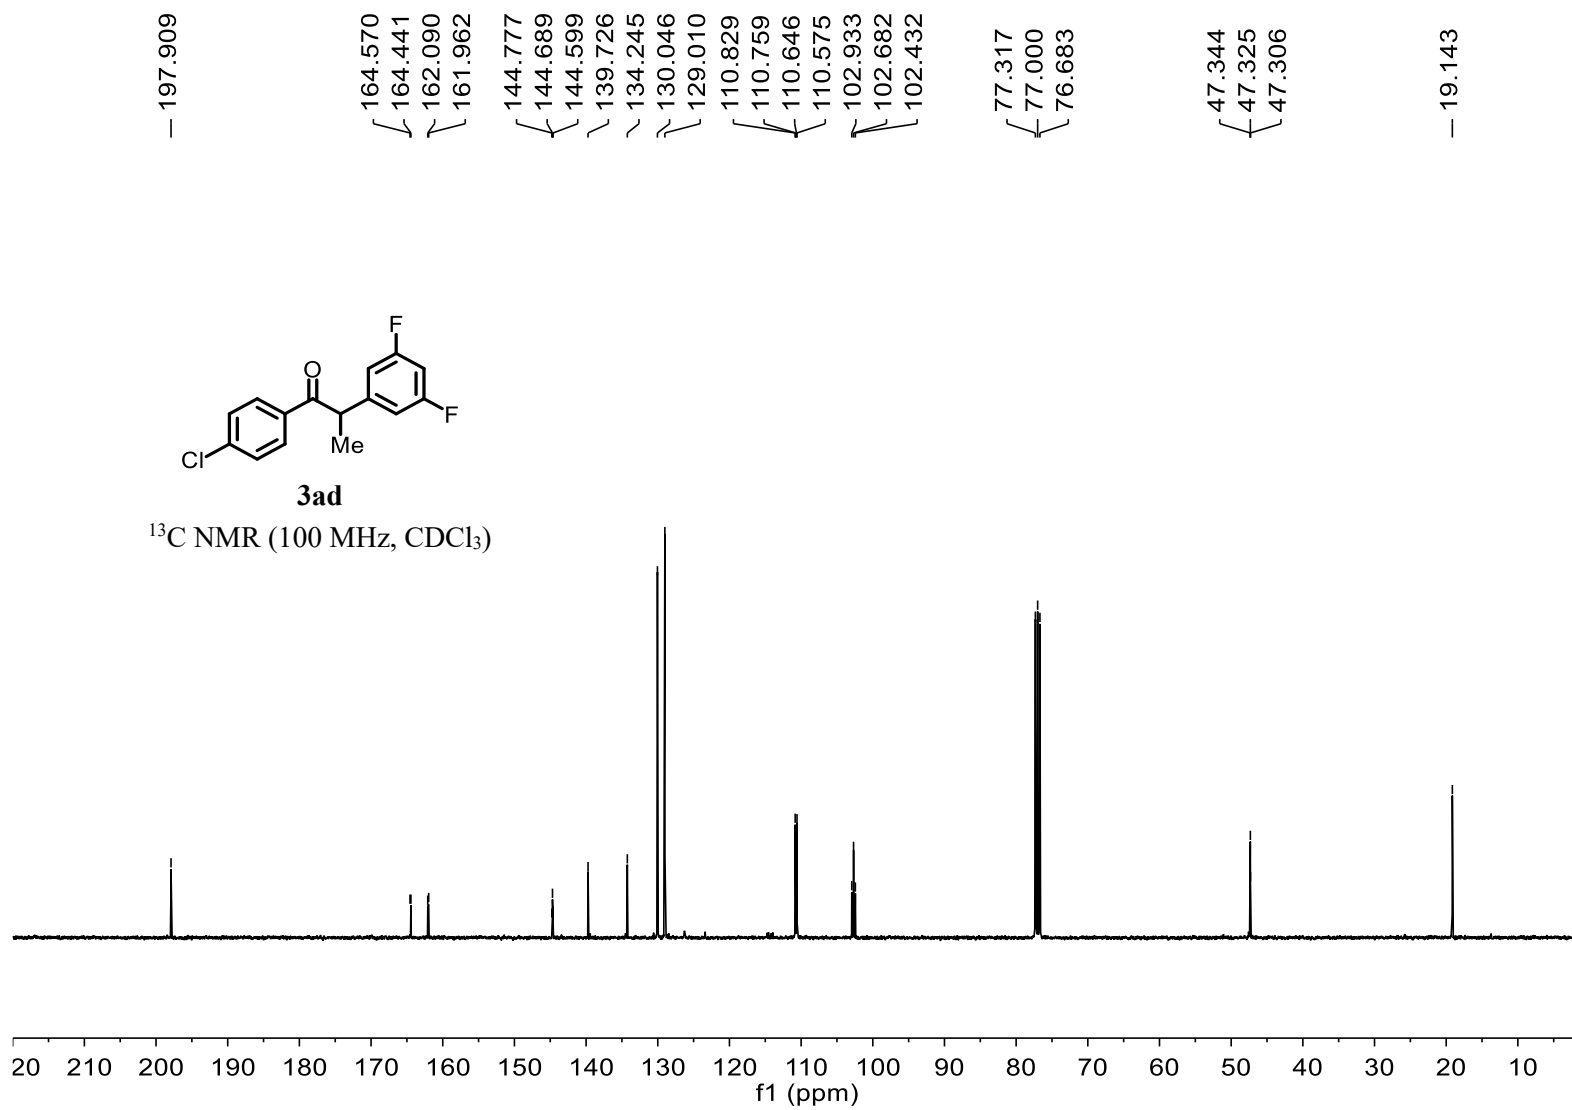

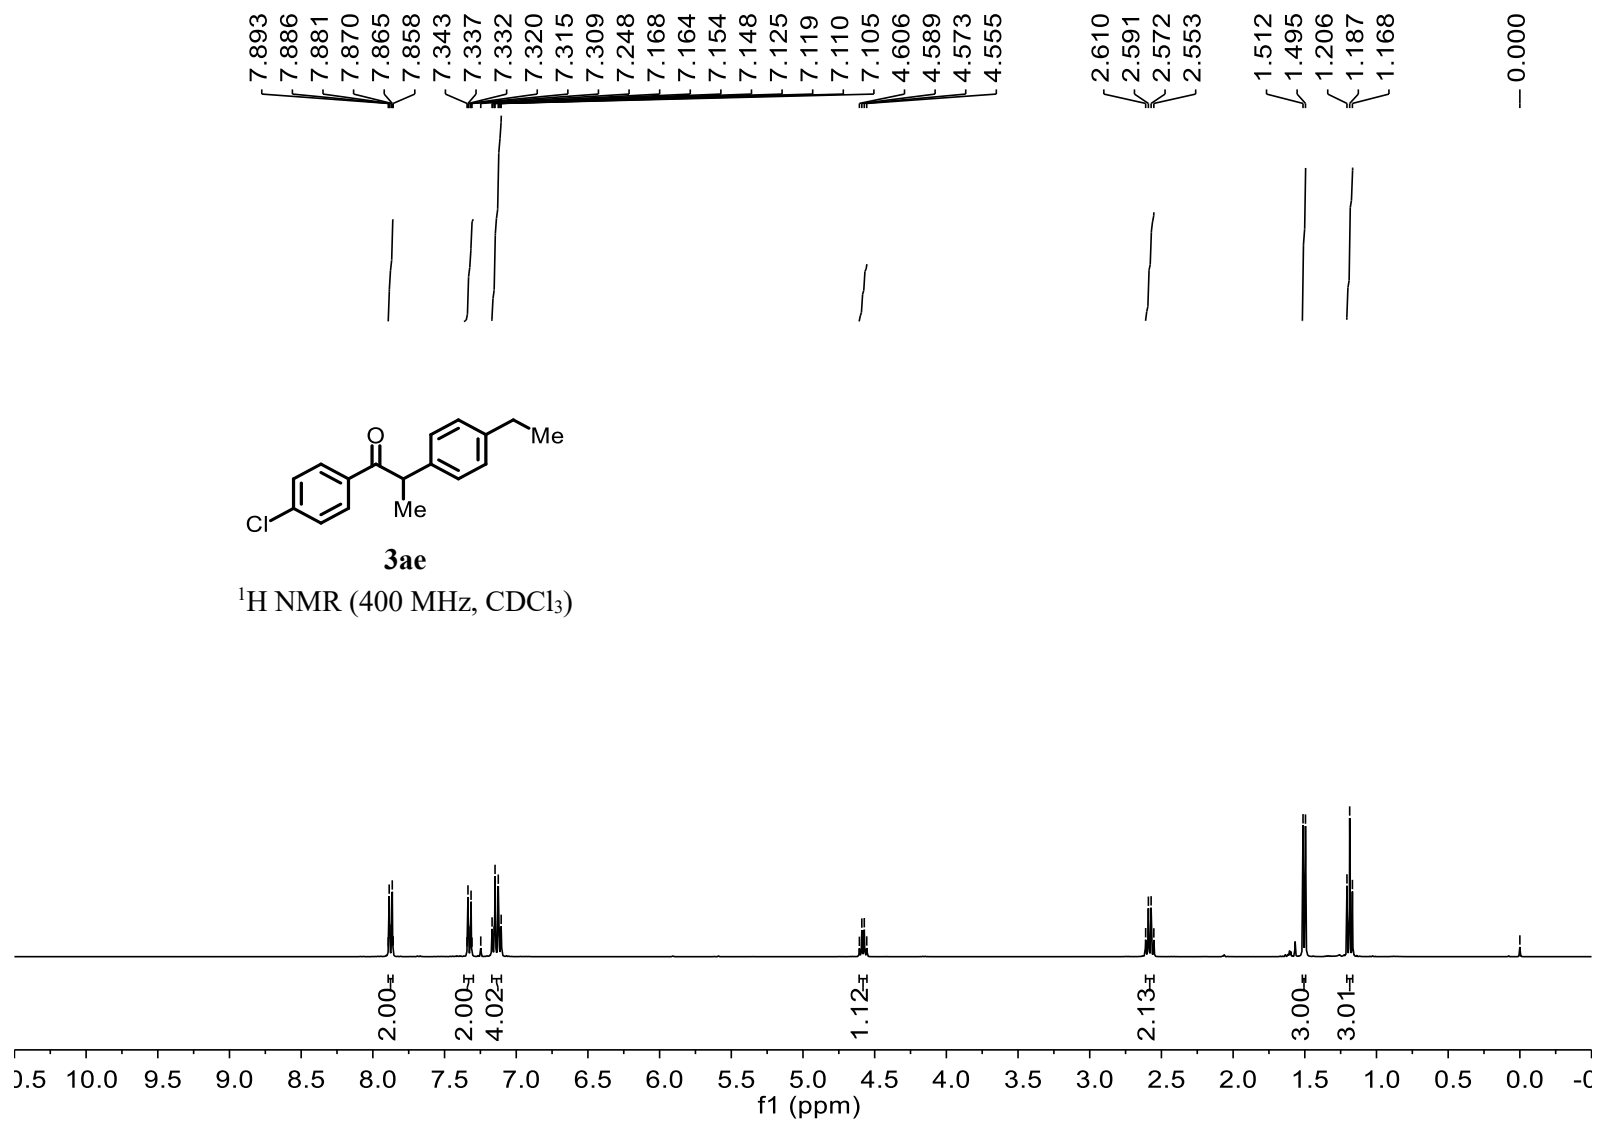



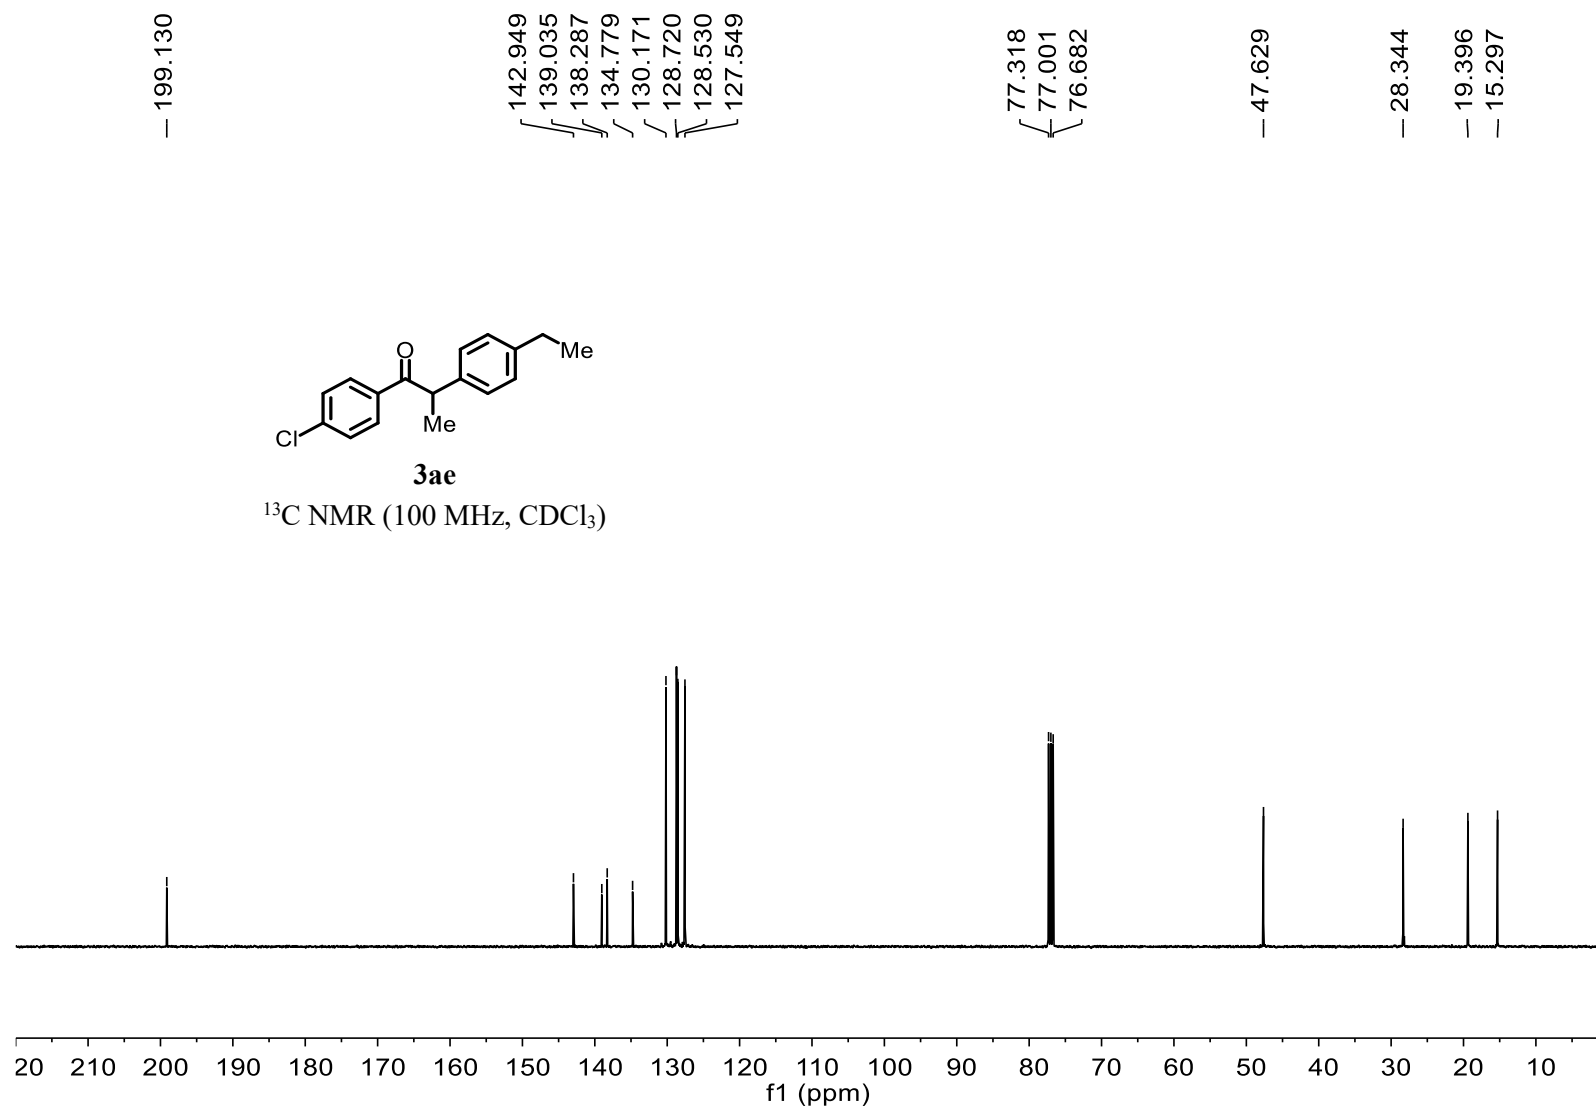

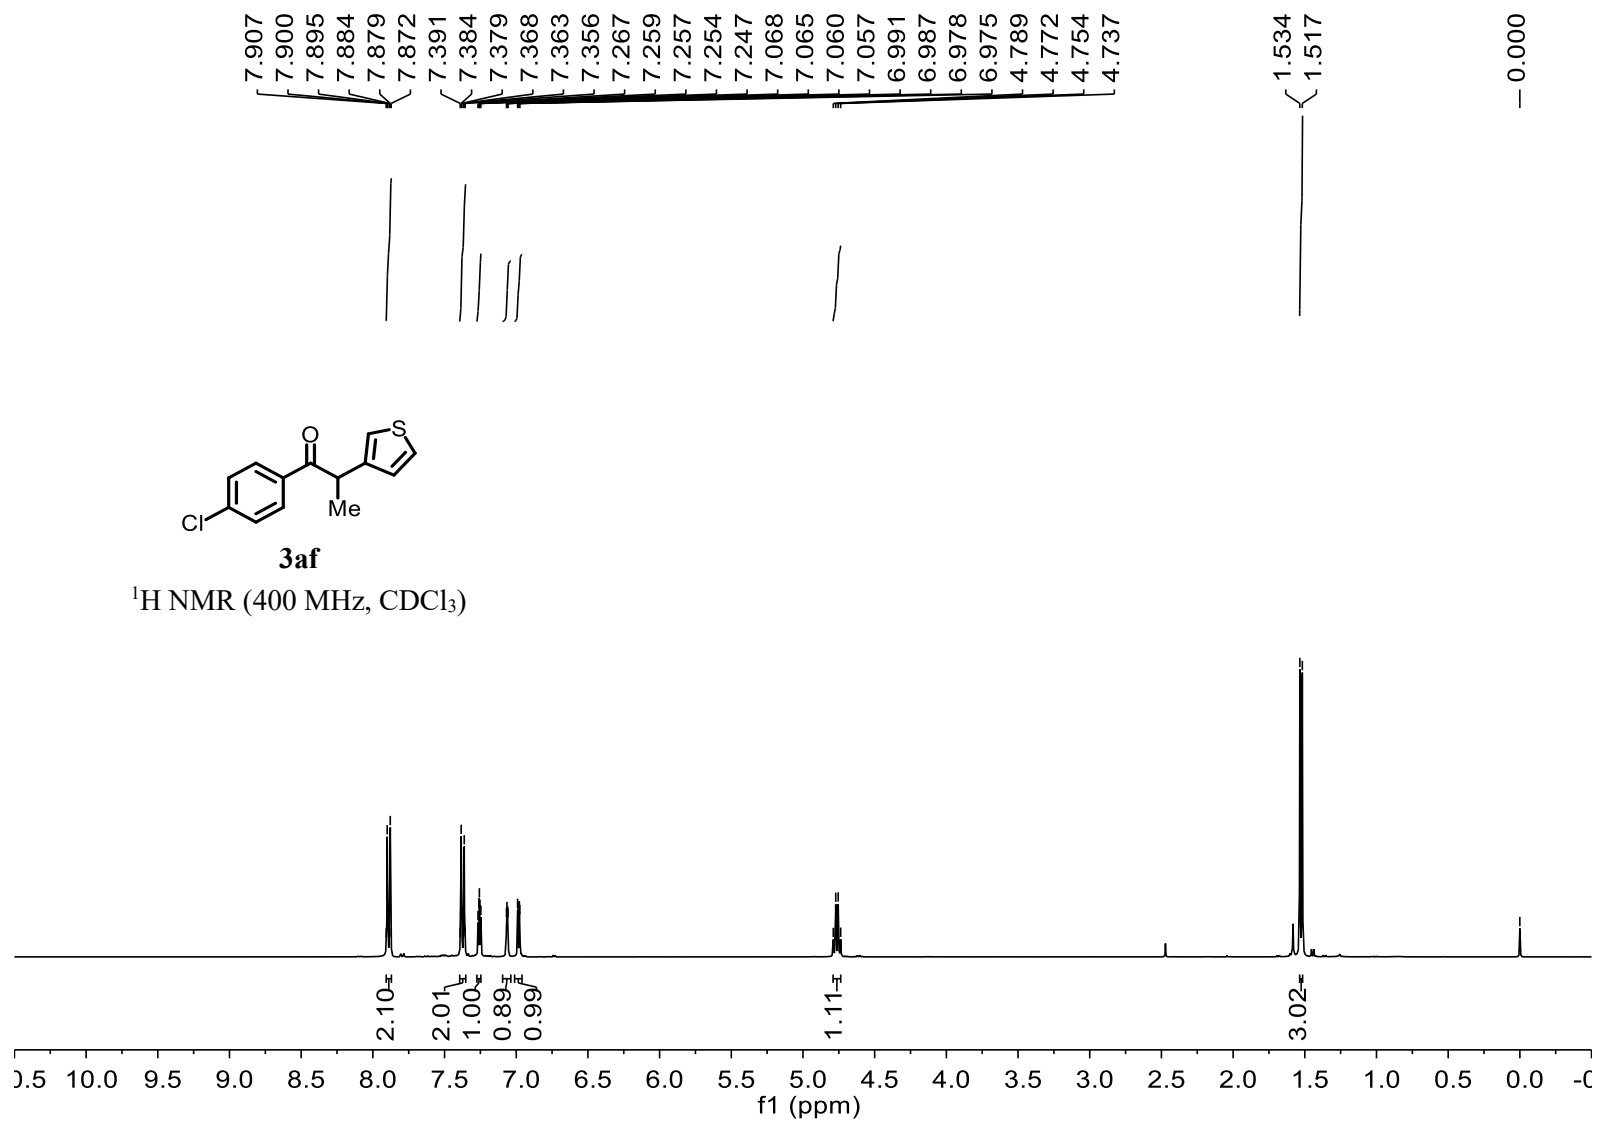

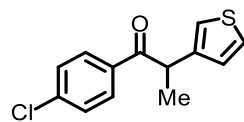

**3af**

$^{13}\text{C}$  NMR (100 MHz,  $\text{CDCl}_3$ )

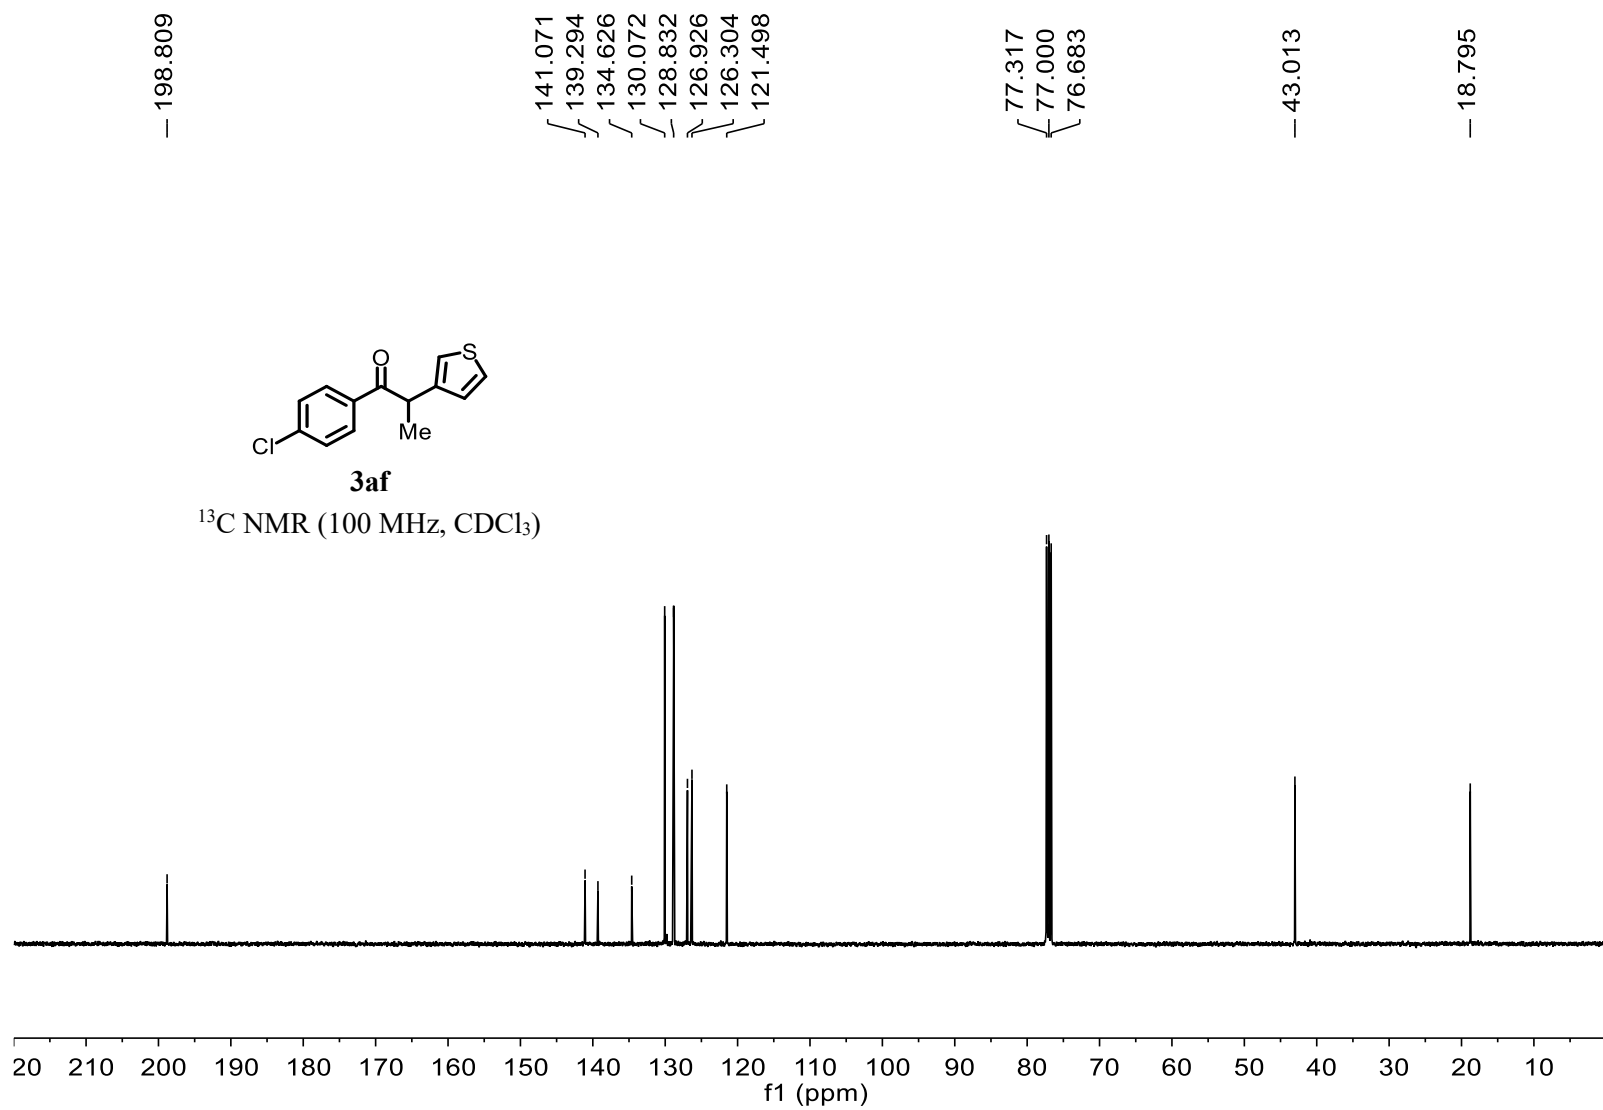

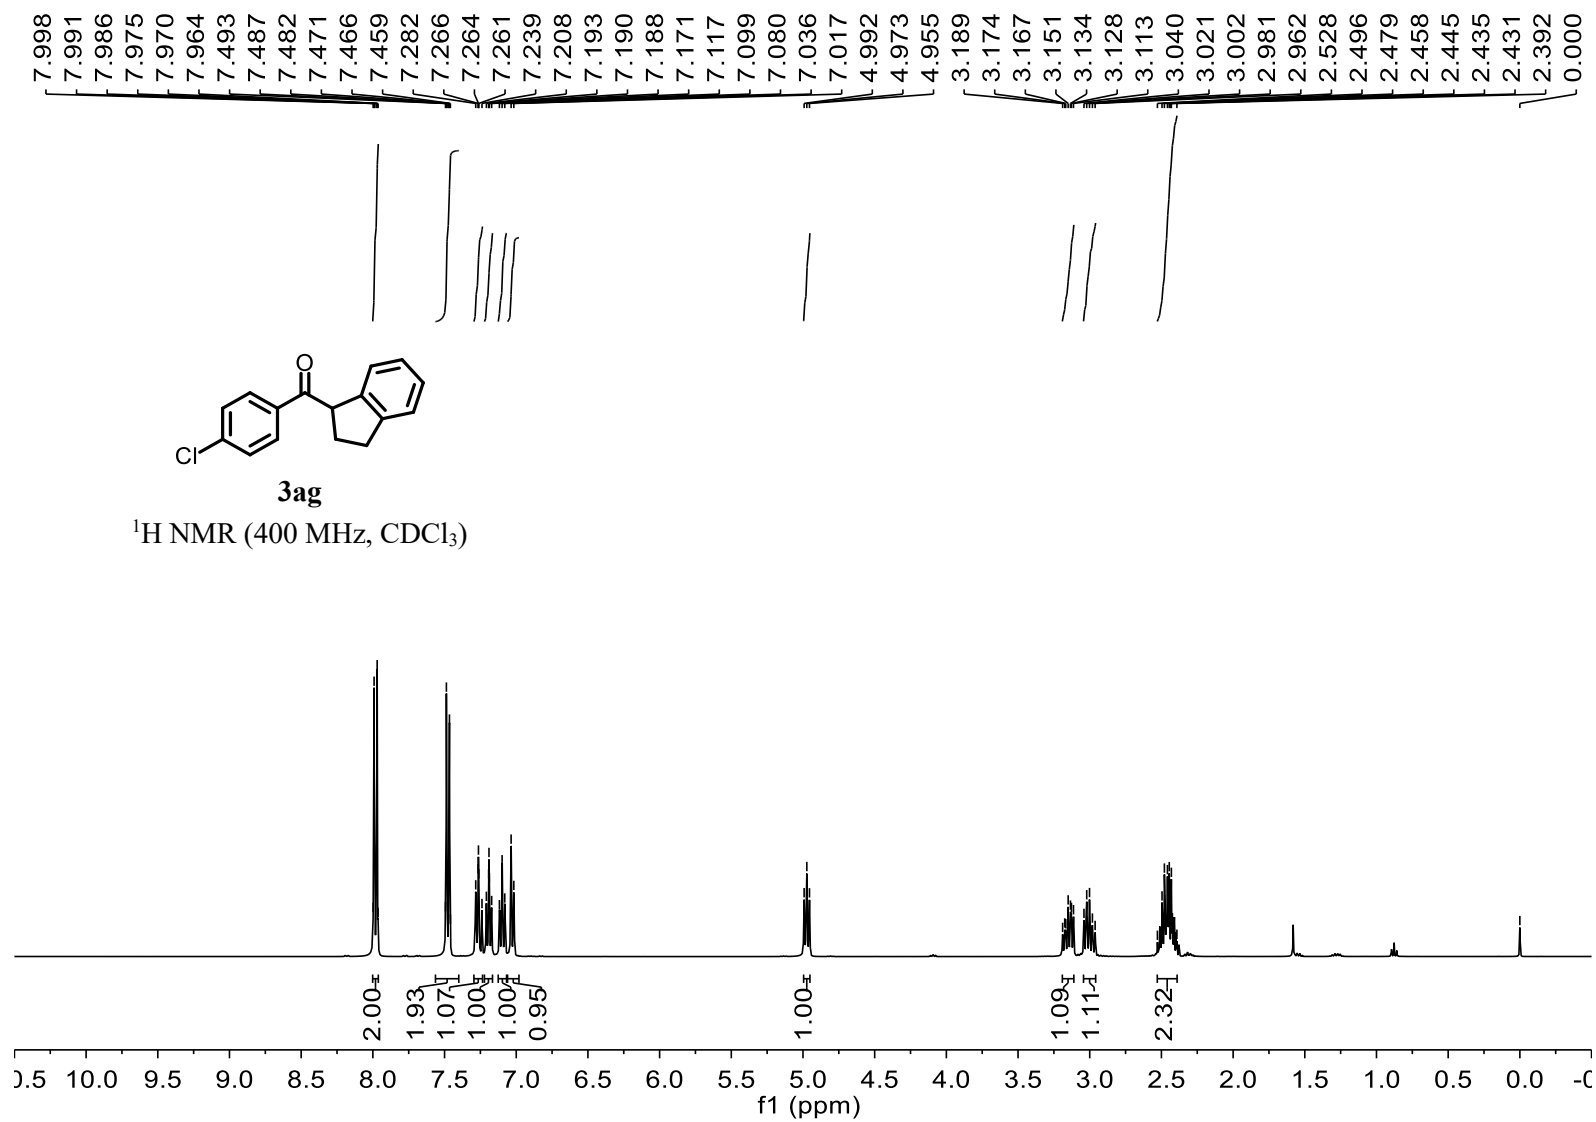

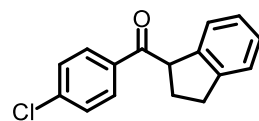

**3ag**

$^{13}\text{C}$  NMR (100 MHz,  $\text{CDCl}_3$ )

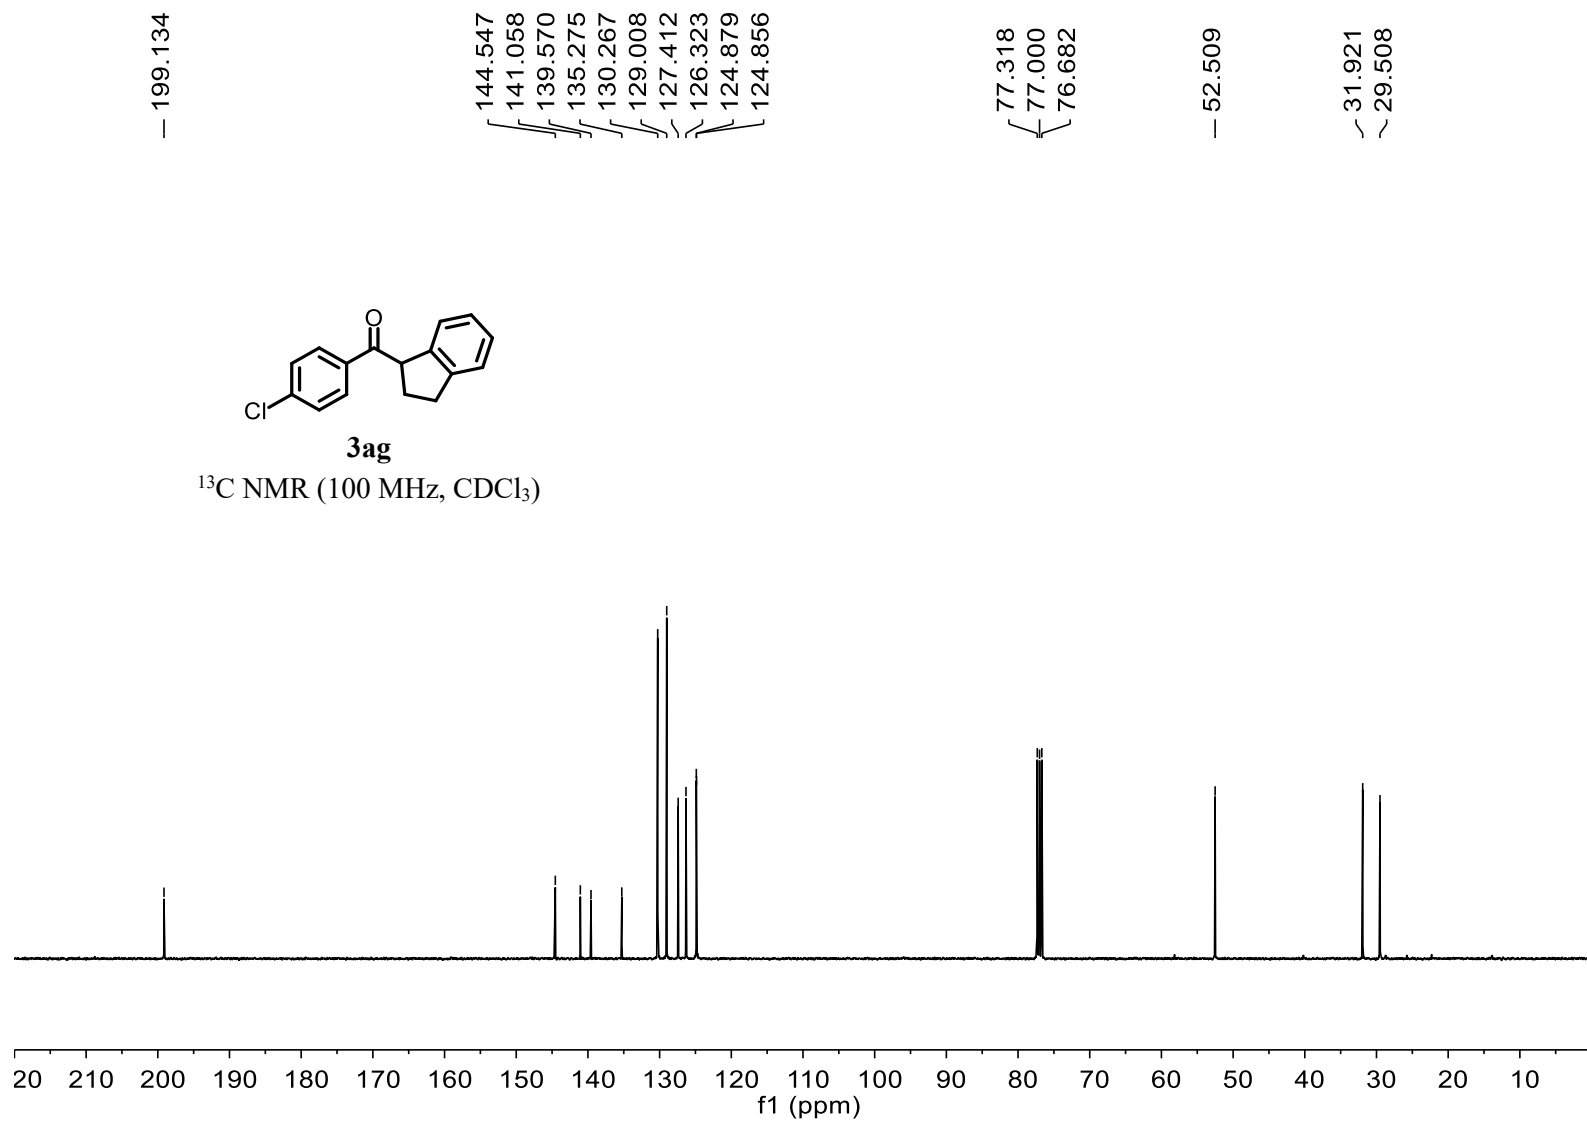

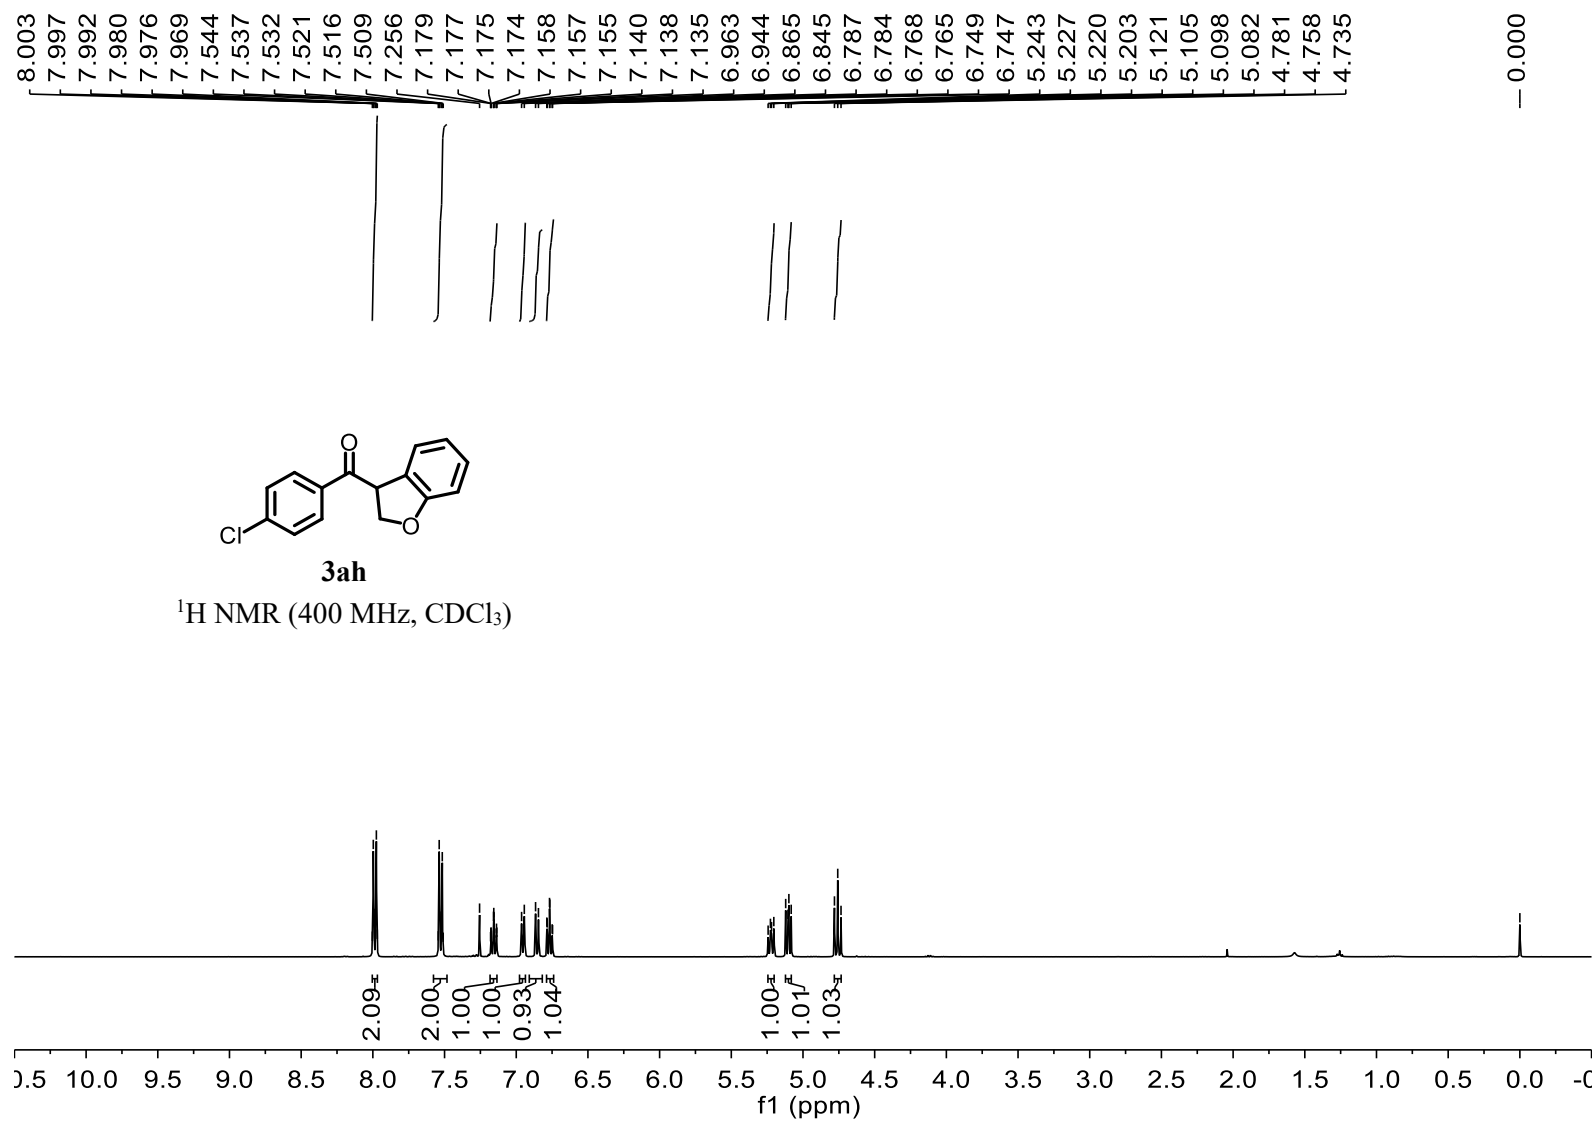

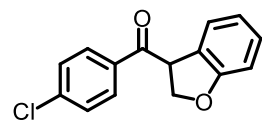

**3ah**

$^{13}\text{C}$  NMR (100 MHz,  $\text{CDCl}_3$ )

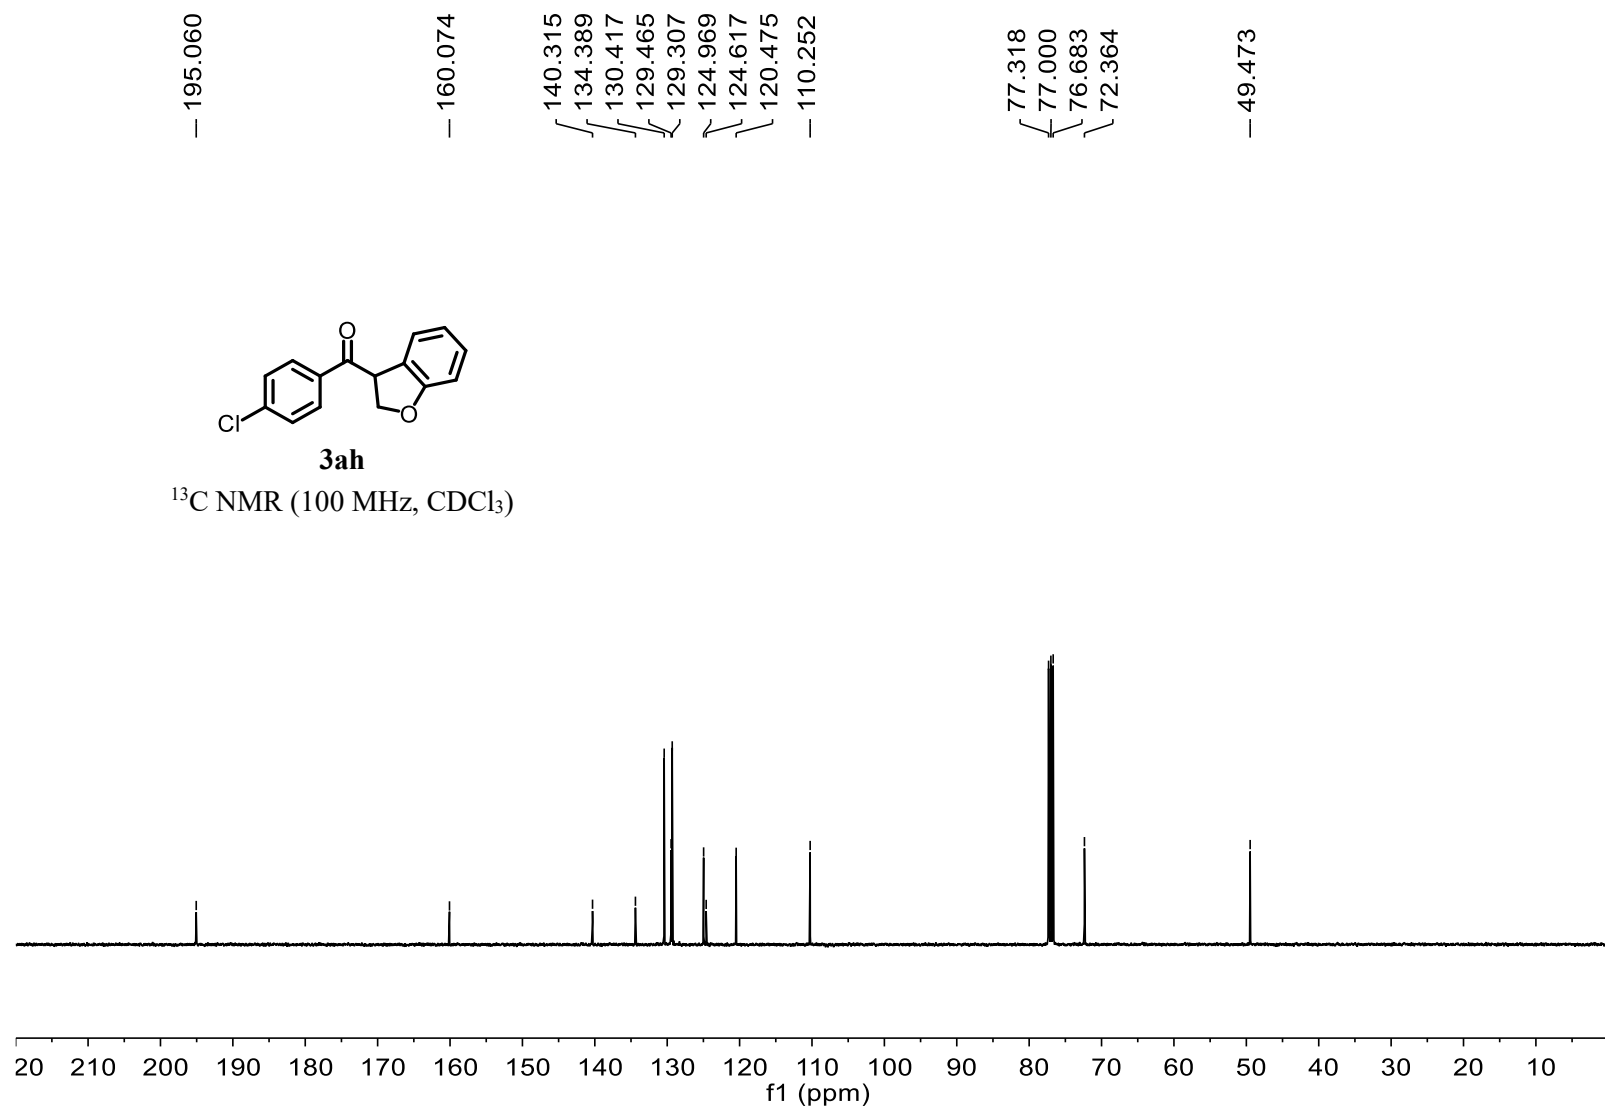

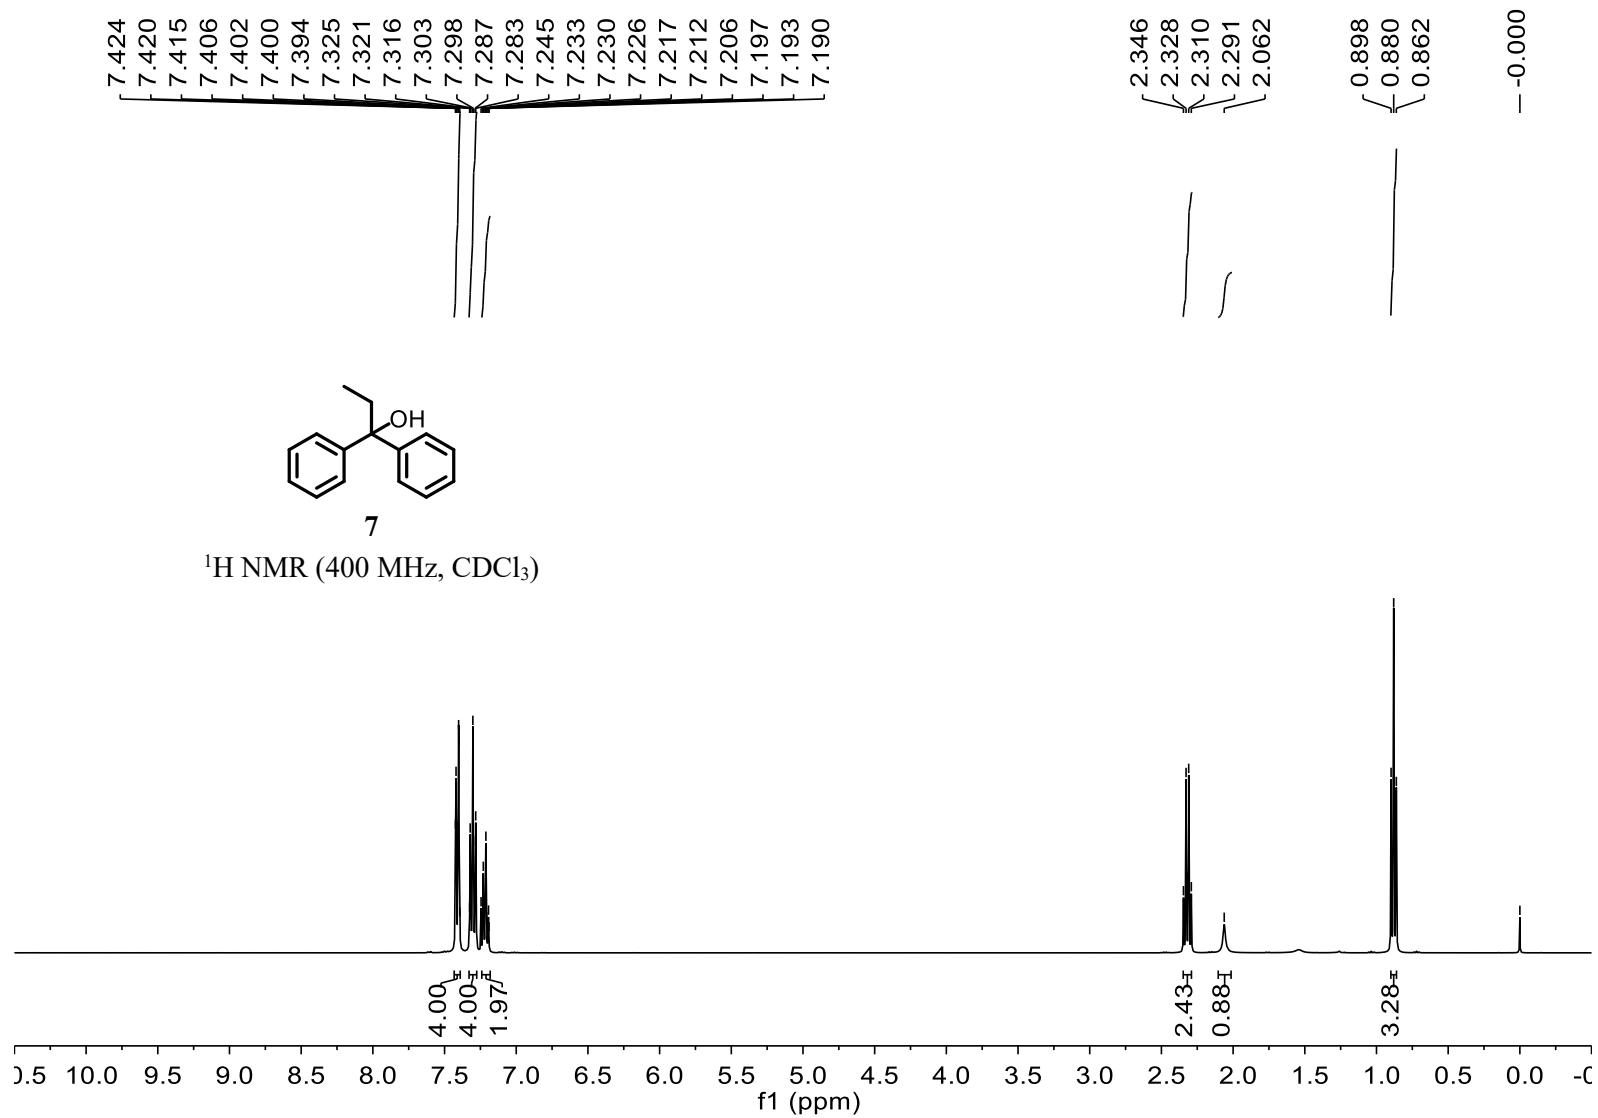



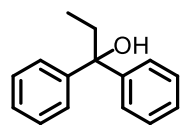

7

$^{13}\text{C}$  NMR (100 MHz,  $\text{CDCl}_3$ )

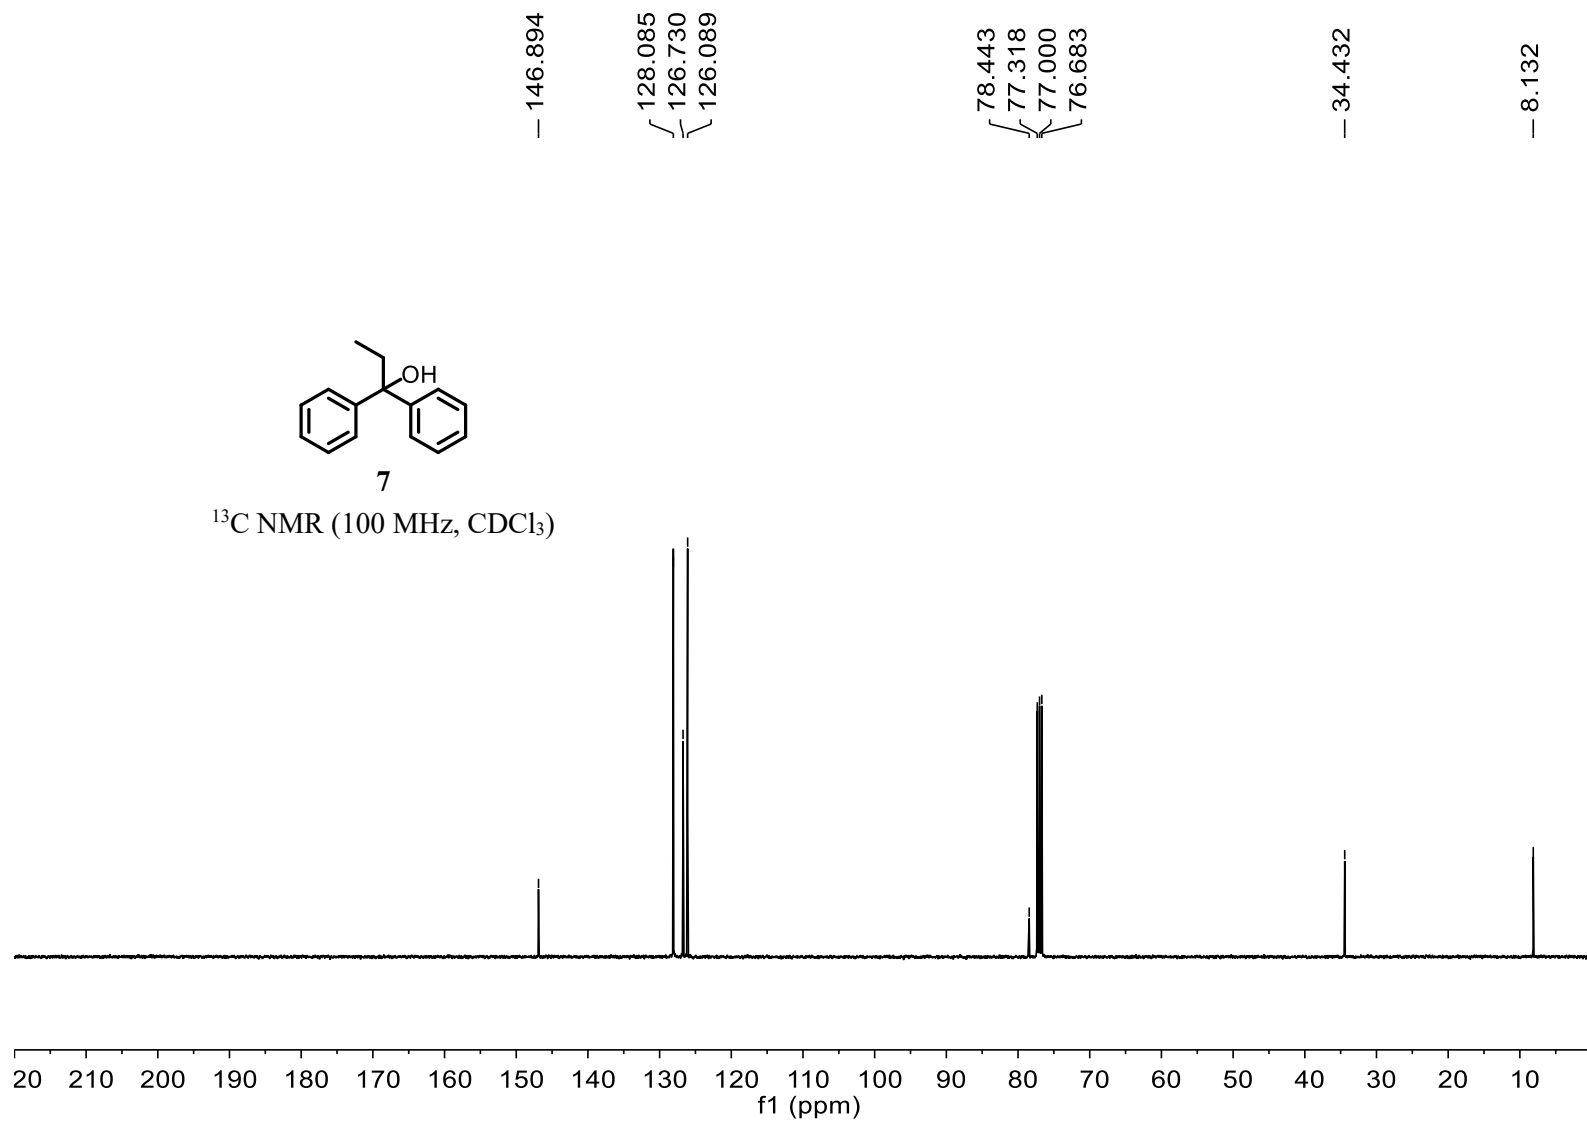

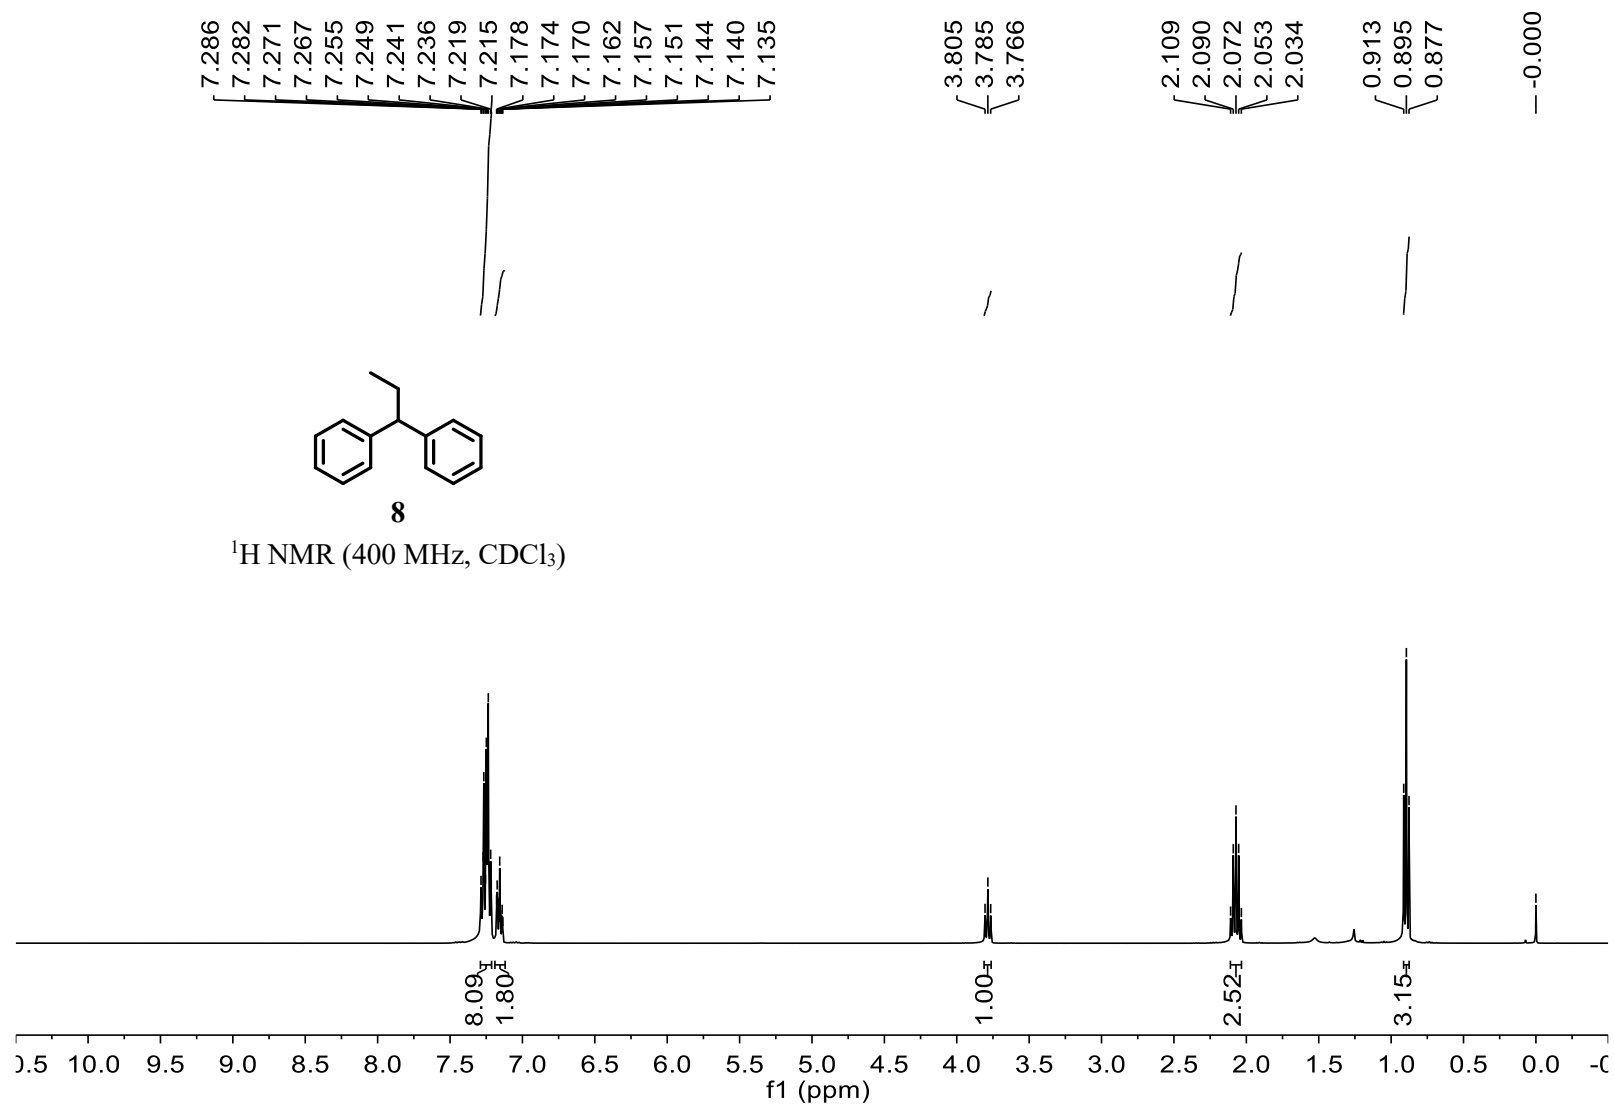

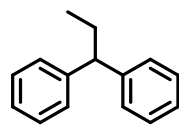

**8**

$^{13}\text{C}$  NMR (100 MHz,  $\text{CDCl}_3$ )

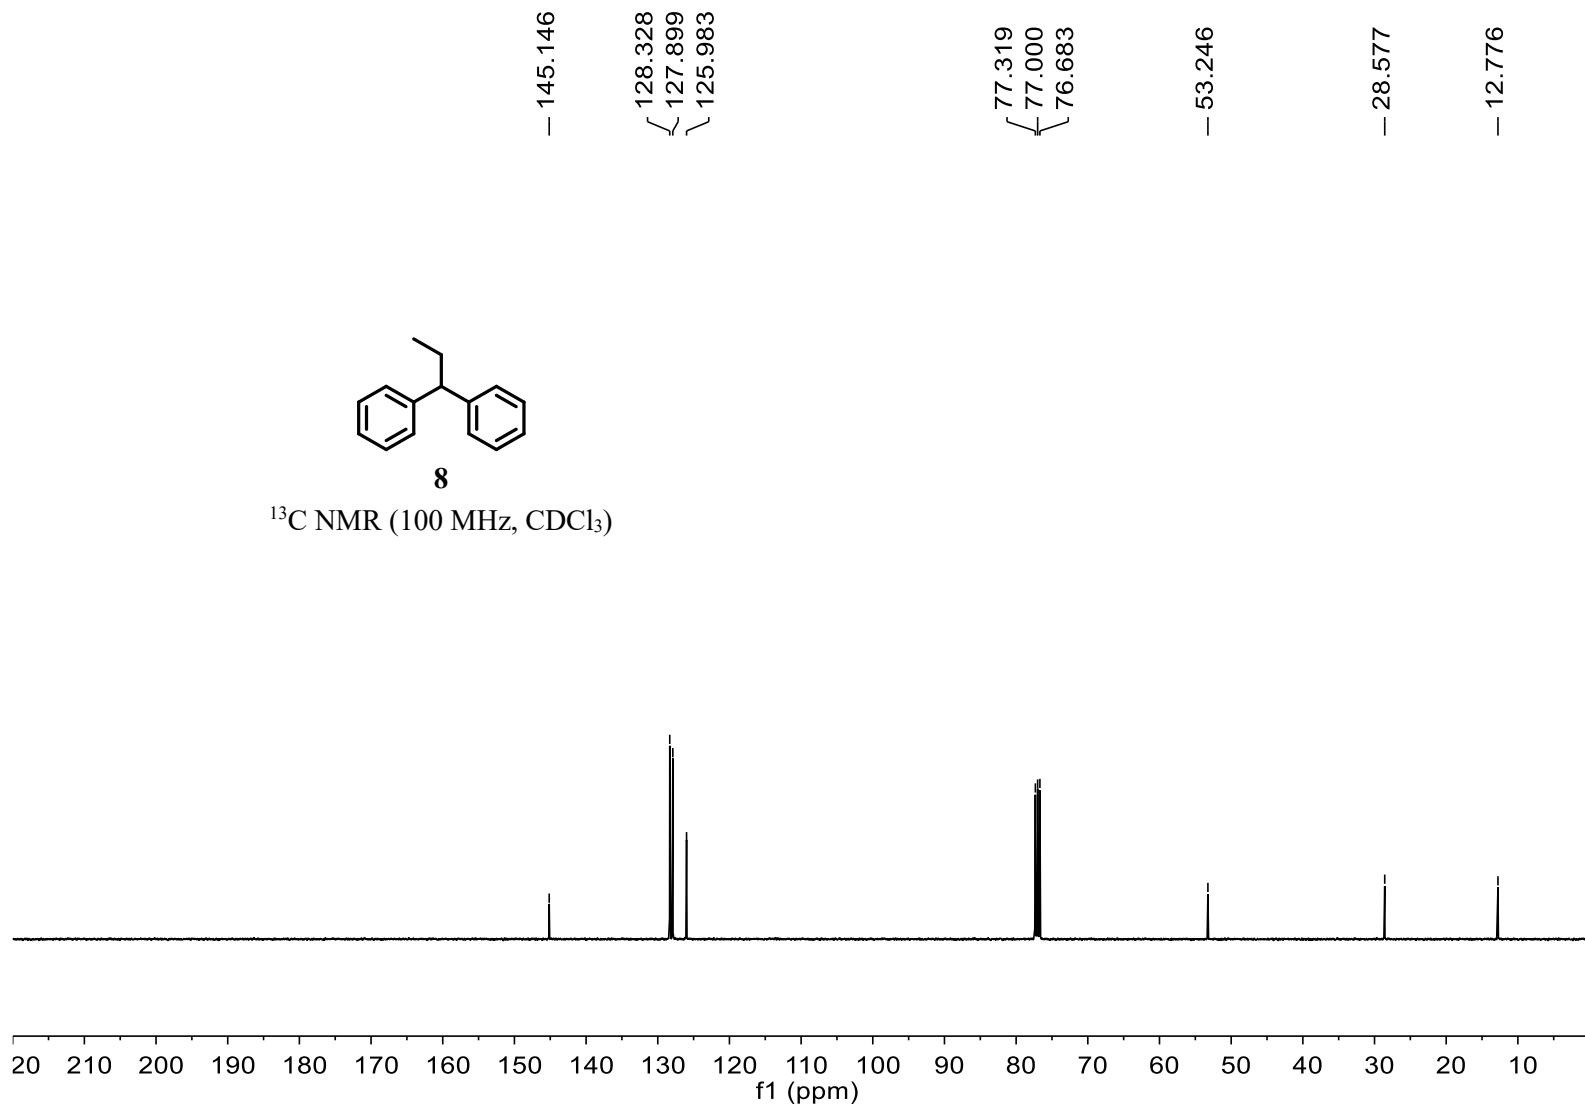

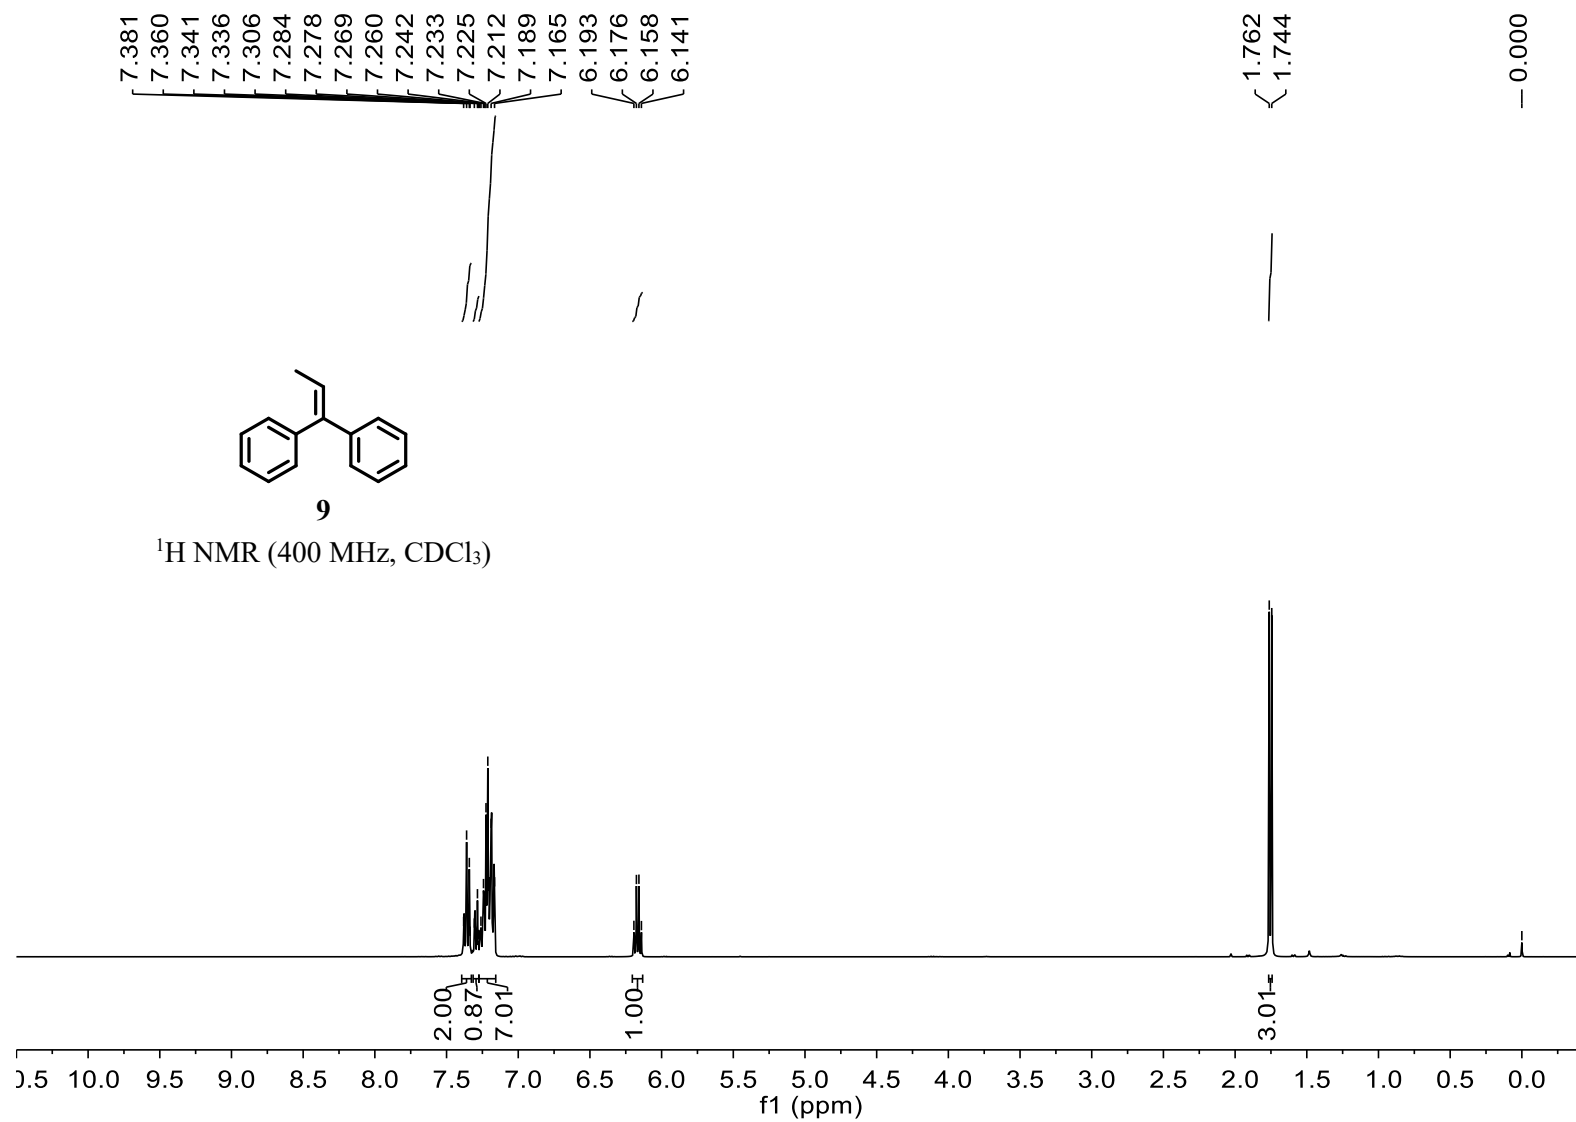

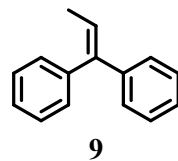

$^{13}\text{C}$  NMR (100 MHz,  $\text{CDCl}_3$ )

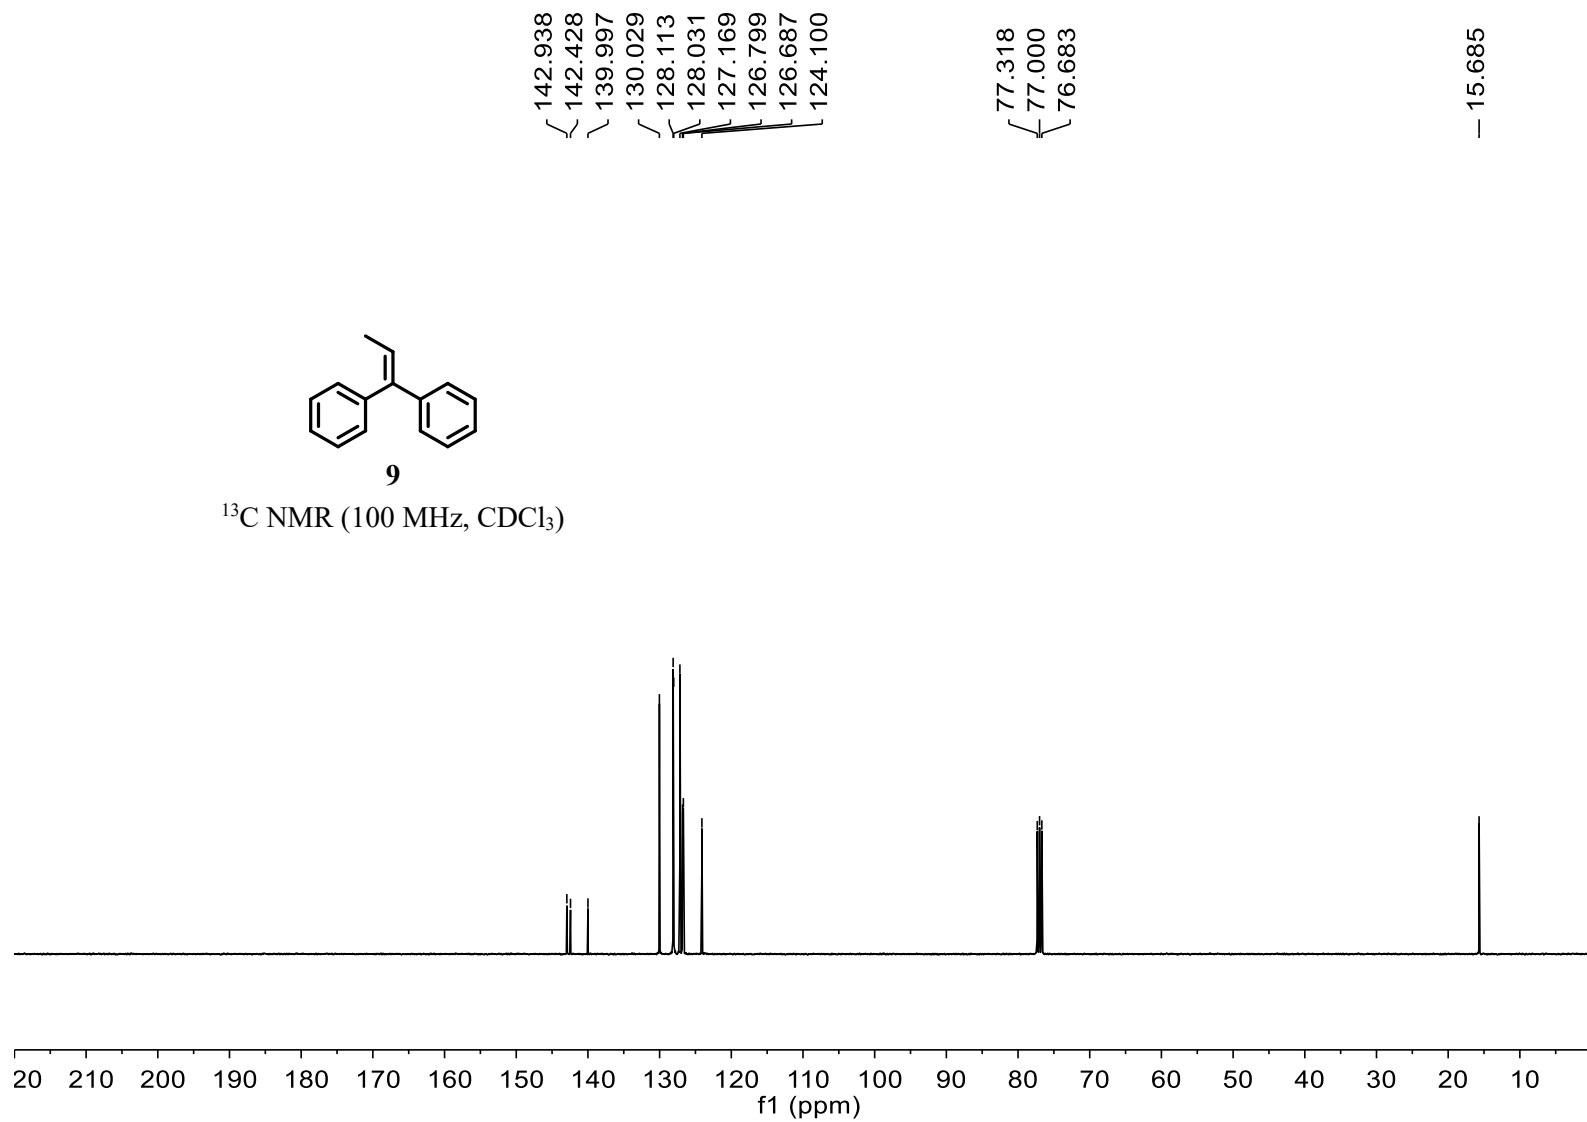

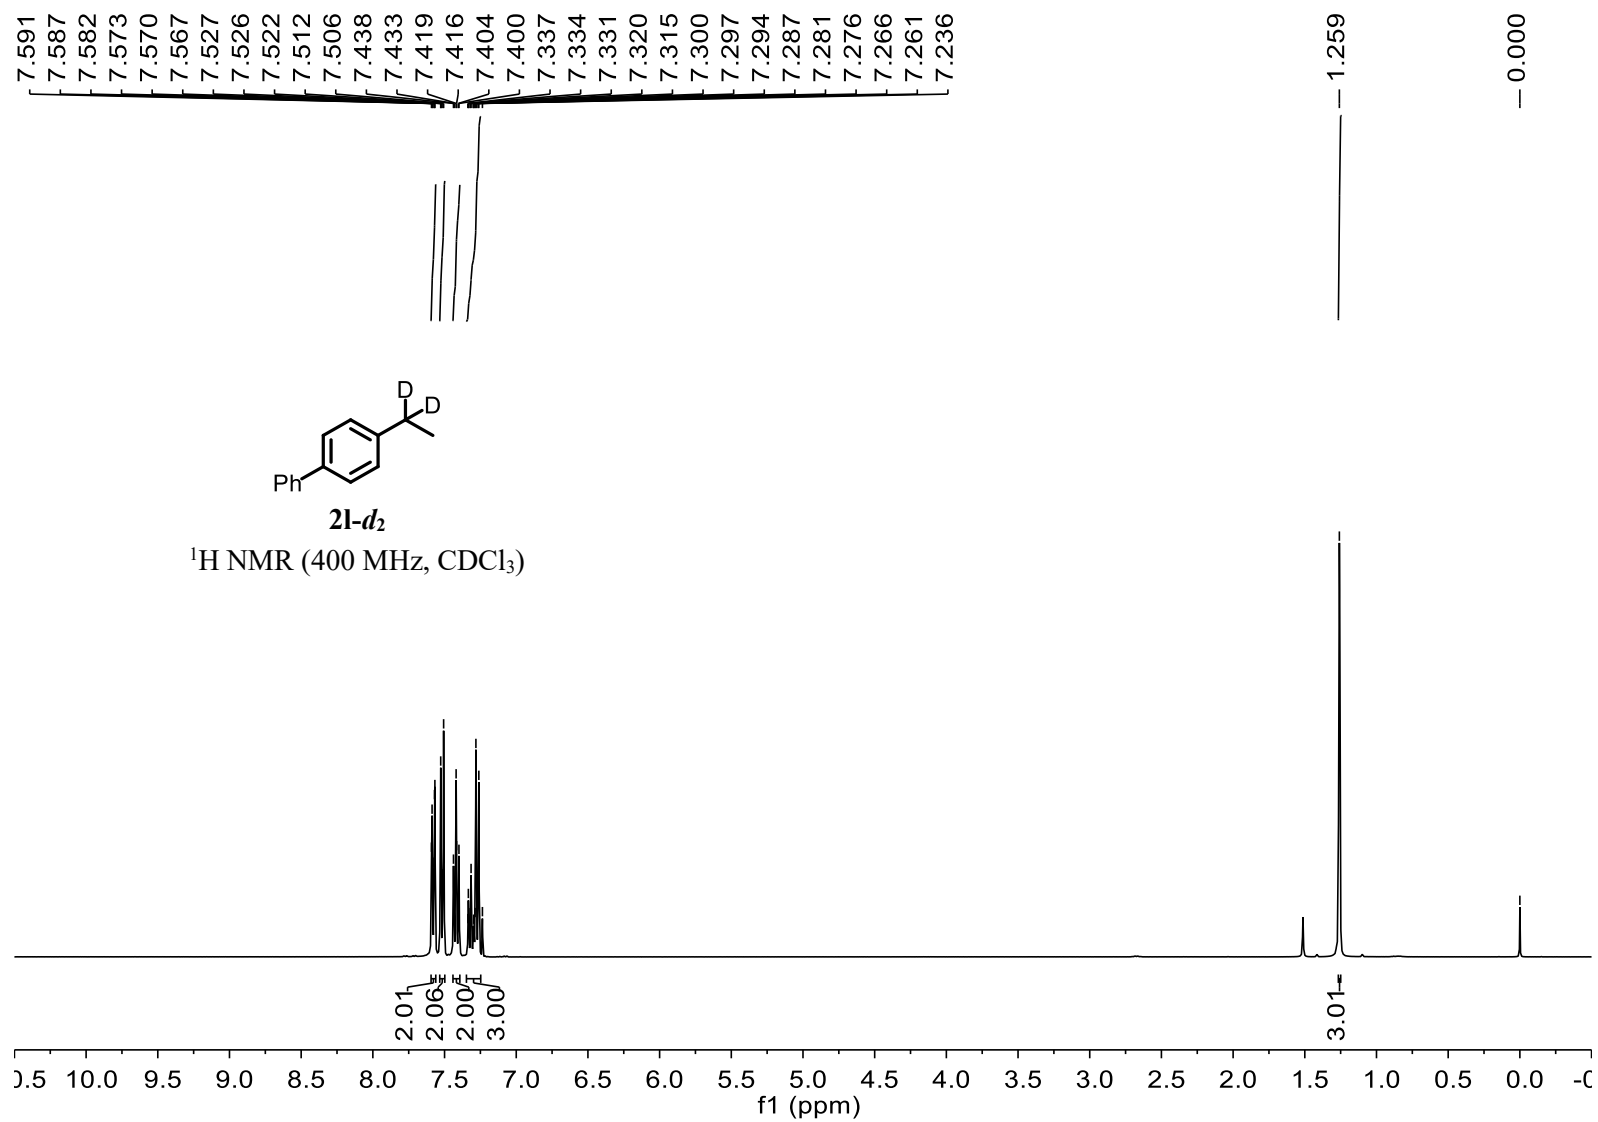

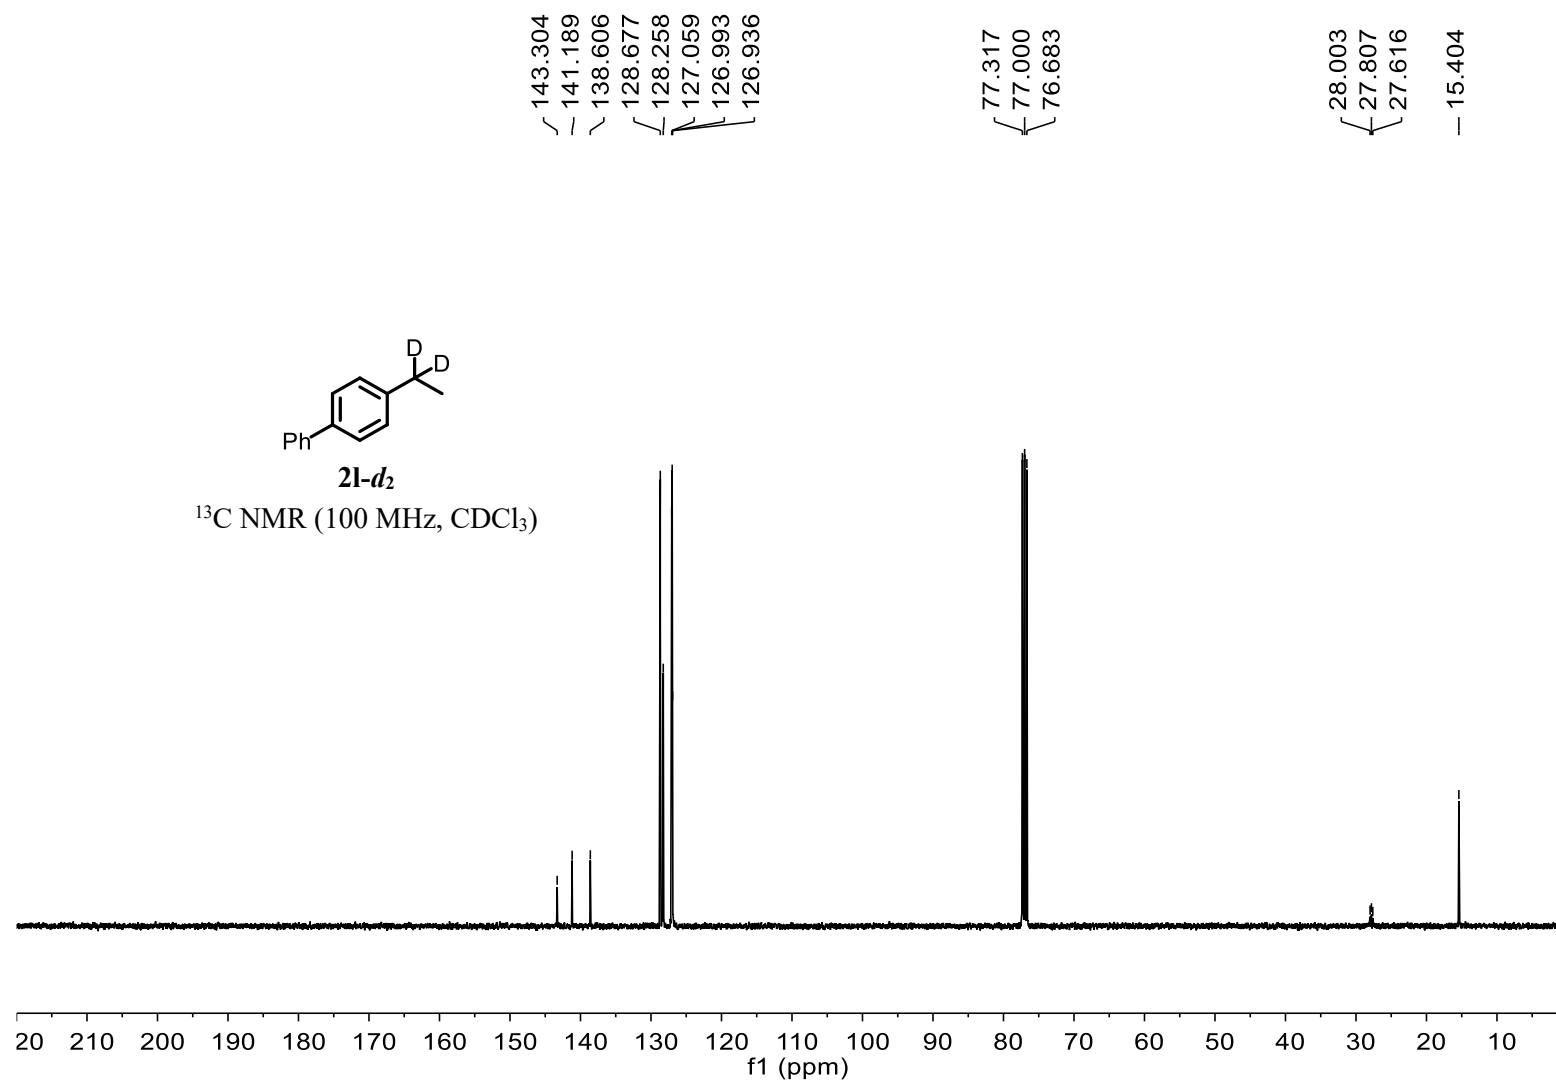

## 10. References

1. Xu, Y. et al., A light-driven enzymatic enantioselective radical acylation. *Nature* **625**, 74-78 (2024).
2. Tang, L. et al. Construction of “small-intelligent” focused mutagenesis libraries using well-designed combinatorial degenerate primers. *Bio Techniques*. **52**, 149-158 (2012).
3. Li, A., Acevedo-Rocha, C. G. & Reetz, M. T. Boosting the efficiency of site-saturation mutagenesis for a difficult-to-randomize gene by a two-step PCR strategy. *Appl. Microbiol. Biotechnol.* **102**, 6095-6103 (2018).
4. Liao, Y., Xing, C., Hu, Q. Rhodium(I)/diene-catalyzed addition reactions of arylborons with ketones. *Org. Lett.* **14**, 1544-1547 (2012).
5. Jin, L. et al. Unsymmetrical CNN-palladacycles with geometry-constrained iminopyridyl ligands: an efficient precatalyst in Suzuki coupling for accessing 1,1-diaryllkanes from secondary benzylic bromides. *Org. Chem. Front.* **5**, 2484-2491 (2018).
6. Chatalova-Sazepin, C., Wang, Q., Sammis, G. M. & Zhu, J. Copper-catalyzed intermolecular carboetherification of unactivated alkenes by alkyl nitriles and alcohols. *Angew. Chem. Int. Ed.* **54**, 5443-5446 (2015).
7. Tie, L., Shan, X.-H., Qu, J.-P. & Kang, Y.-B.  $\alpha$ -Trideuteration of methylarenes. *Org. Chem. Front.* **8**, 2981-2984 (2021).
8. Finney, E. E., Ogawa, K. A. & Boydston, A. J. Organocatalyzed anodic oxidation of aldehydes. *J. Am. Chem. Soc.* **134**, 12374-12377 (2012).
9. Hari, D. P. & König, B. Synthetic applications of eosin Y in photoredox catalysis. *Chem. Commun.* **50**, 6688-6699 (2014).
10. Leibler, I. N.-M., Tekle-Smith, M. A. & Doyle, A. G. A general strategy for C(sp<sup>3</sup>)-H functionalization with nucleophiles using methyl radical as a hydrogen atom abstractor. *Nat. Commun.* **12**, 6950 (2021).
11. Delfau, L. et al. Critical assessment of the reducing ability of Breslow-type derivatives and implications for carbene-catalyzed radical reactions. *Angew. Chem. Int. Ed.* **60**, 26783-26789 (2021).
12. Waterhouse, A. et al., SWISS-MODEL: homology modelling of protein structures and complexes. *Nucleic Acids Res.* **46**, W296-W303 (2018).
13. Trott, O. & Olson, A. J. AutoDock Vina: improving the speed and accuracy of docking with a new scoring function, efficient optimization, and multithreading. *J. Comput. Chem.* **31**, 455-461 (2010).
14. Søndergaard, C. R., Olsson, M. H. M., Rostkowski, M. & Jensen, J. H. Improved treatment of ligands and coupling effects in empirical calculation and rationalization of pKa values. *J. Chem. Theory Comput.* **7**, 2284-2295 (2011).
15. Maier, J. A. et al. ff14SB: Improving the accuracy of protein side chain and backbone parameters from ff99SB. *J. Chem. Theory Comput.* **11**, 3696-3713 (2015).
16. Wang, J., Wolf, R. M., Caldwell, J. W., Kollman, P. A. & Case, D. A. Case, Development and testing of a general amber force field. *J. Comput. Chem.* **25**, 1157-1174 (2004).
17. Bayly, C. I., Cieplak, P., Cornell, W. & Kollman, P. A. A well-behaved electrostatic



- potential based method using charge restraints for deriving atomic charges: the RESP model. *J. Phys. Chem.* **97**, 10269-10280 (1993).
18. Krätzler, V., van Gunsteren, W. F. & Hünenberger, P. H. A fast SHAKE algorithm to solve distance constraint equations for small molecules in molecular dynamics simulations. *J. Comput. Chem.* **22**, 501-508 (2001).
  19. Case, A. D. et al., AMBER 2020. (2020).
  20. Senn, H. M. & Thiel, W. QM/MM methods for biomolecular systems. *Angew. Chem. Int. Ed.* **48**, 1198-1229 (2009).
  21. Metz, S., Kästner, J., Sokol, A. A., Keal, T. W. & Sherwood, P. ChemShell-a modular software package for QM/MM simulations. *WIREs Comput. Mol. Sci.* **4**, 101-110 (2014).
  22. Ahlrichs, R., Bär, M., Häser, M., Horn, H. & Kölmel, C. Electronic structure calculations on workstation computers: The program system turbomole. *Chem. Phys. Lett.* **162**, 165-169 (1989).
  23. Smith, W., Yong, C. W. & Rodger, P. M. DL\_POLY: Application to molecular simulation. *Mol. Simul.* **28**, 385-471 (2002).
  24. Frisch, M. J. et al., Gaussian 16 Rev. A.03. (2016).
  25. Marenich, A. V., Cramer, C. J. & Truhlar, D. G. Universal solvation model based on solute electron density and on a continuum model of the solvent defined by the bulk dielectric constant and atomic surface tensions. *J. Phys. Chem. B* **113**, 6378-6396 (2009).
  26. Chai, J.-D. & Head-Gordon, M. Long-range corrected hybrid density functionals with damped atom-atom dispersion corrections. *Phys. Chem. Chem. Phys.* **10**, 6615-6620 (2008).
  27. Aragó, J., Sancho-García, J. C., Ortí, E. & Beljonne, D. Ab Initio Modeling of Donor-Acceptor Interactions and Charge-Transfer Excitations in Molecular Complexes: The Case of Terthiophene-Tetracyanoquinodimethane. *J. Chem. Theory. Comput.* **7**, 2068-2077 (2011).
  28. Kim, J. & Yi, C.-S. Intermolecular Markovnikov-selective hydroacylation of olefins catalyzed by a cationic ruthenium-hydride complex. *ACS Catal.* **6**, 3336-3339 (2016).
  29. Pichette Drapeau, M. et al. Transition-metal-free  $\alpha$ -arylation of enolizable aryl ketones and mechanistic evidence for a radical process. *Angew. Chem. Int. Ed.* **54**, 10587-10591 (2015).
  30. Liu, F., et al. N-Heterocyclic carbene-palladacyclic complexes: synthesis, characterization and their applications in the C-N coupling and  $\alpha$ -arylation of ketones using aryl chlorides. *Tetrahedron Lett.* **74**, 5683-5690 (2018).
  31. Lundin, P. M., Esquivias, J. & Fu, G. C. Catalytic asymmetric cross-couplings of racemic  $\alpha$ -bromoketones with arylzinc reagents. *Angew. Chem. Int. Ed.* **48**, 154-156 (2009).
  32. Peng, C., Zhang, W., Yan, G. & Wang, J.-B. Arylation and vinylation of  $\alpha$ -diazocarbonyl compounds with boroxines. *Org. Lett.* **11**, 1667-1670 (2009).
  33. Kim, J., Jang, J., Lee, Y. & Shin, K. Exogenous ligand-free NiH-catalyzed hydroacylation of aryl alkenes with aroyl fluorides. *Org. Lett.* **24**, 5412-5416 (2022).
  34. Scholz, M. et al. Diaryl-dithiolanes and -isothiazoles: COX-1/COX-2 and 5-LOX-inhibitory, OH scavenging and anti-adhesive activities. *Bio. Org. Med. Chem.* **17**, 558-568 (2009).
  35. Schedler, M., Wang, D.-S. & Glorius, F. NHC-catalyzed hydroacylation of styrenes.

- Angew. Chem. Int. Ed.* **52**, 2585-2589 (2013).
36. Sim, S-B. D., Wang, M. & Zhao, Y. Phase-transfer-catalyzed enantioselective  $\alpha$ -hydroxylation of acyclic and cyclic ketones with oxygen. *ACS Catal.* **5**, 3609-3612 (2015).
  37. Zhang, Z. et al. Anodic oxidation triggered divergent 1, 2- and 1, 4-group transfer reactions of  $\beta$ -hydroxycarboxylic acids enabled by electrochemical regulation. *Chem. Sci.* **11**, 12021-12028 (2020).
  38. Henrion, M., Chetcuti, M. J. & Ritleng, V. From acetone metalation to the catalytic  $\alpha$ -arylation of acyclic ketones with NHC-nickel (II) complexes. *Chem. Commun.* **50**, 4624-4627 (2014).
  39. Meng, Q.-Y., Lezius, L. & Studer, A. Benzylic C-H acylation by cooperative NHC and photoredox catalysis. *Nat. Commun.* **12**, 2068 (2021).
  40. Wang, C. et al. Palladium-catalyzed secondary benzylic imidoylative reactions. *Org. Lett.* **22**, 6954-6959 (2020).
  41. Yan, W.-J., Tu, H.-Y., Liao, Z., Shen, X.-Q. & Zhang, X.-G. Palladium-catalyzed ring-opening diarylation of cyclobutanols for the synthesis of acylindanes. *Adv. Synth. Catal.* **365**, 2147-2151 (2023).
